# Supplementary material for: The Role of ARHGAP1 in Rho GTPase Inactivation during Metastasizing of Breast Cancer Cell Line MCF-7 after Treatment with Doxorubicin
Source: MDPI journal article supplement (doi:10.3390/ijms241411352), 2023-07-12
Supplement: s1 [file s1]

Table S1  
List of identified and quantified proteins.

| #  | Visible? | Starred? | Identified Proteins (1803)                                                                                    | Accession Number | Molecular Weight | Protein Grouping Ambiguity | T-Test (P-Value): (p <= 0.05) | Fold Change by Category | MCF-7[1] | MCF-7[2] | MCF-7[3] | MCF-7/DOX[1] | MCF-7/DOX[2] | MCF-7/DOX[3] |
|----|----------|----------|---------------------------------------------------------------------------------------------------------------|------------------|------------------|----------------------------|-------------------------------|-------------------------|----------|----------|----------|--------------|--------------|--------------|
| 1  | TRUE     | Empty    | [Pyruvate dehydrogenase [acetyl-transferring]]-phosphatase 1, mitochondrial OS=Homo sapiens GN=PDP1 PE=1 SV=3 | PDP1_HUMAN       | ?                |                            | 0.184606477                   | INF                     | 0        | 0        | 0        | 0.74522      | 0            | 1.96         |
| 2  | TRUE     | Empty    | 1,4-alpha-glucan-branching enzyme OS=Homo sapiens GN=GBE1 PE=1 SV=3                                           | GLGB_HUMAN       | 80 kDa           |                            | 0.145322396                   | INF                     | 0        | 0        | 0        | 1.04         | 0.84713      | 0            |
| 3  | TRUE     | Empty    | 10 kDa heat shock protein, mitochondrial OS=Homo sapiens GN=HSPE1 PE=1 SV=2                                   | CH10_HUMAN       | 11 kDa           |                            | 0.211910961                   | 1.3                     | 15.472   | 13.561   | 23.939   | 23.847       | 21.178       | 22.555       |
| 4  | TRUE     | Empty    | 116 kDa U5 small nuclear ribonucleoprotein component OS=Homo sapiens GN=EFTUD2 PE=1 SV=1                      | U5S1_HUMAN       | ?                | TRUE                       | .013446306                    | 3.778455175             | 2.03     | 2.0863   | 4.73     | 10.433       | 15.248       | 9.78         |
| 5  | TRUE     | Empty    | 14 kDa phosphohistidine phosphatase OS=Homo sapiens GN=PHPT1 PE=1 SV=1                                        | PHP14_HUMAN      | ?                |                            | 0.6126083                     | 0.4                     | 0        | 9.86     | 0        | 2.57         | 0            | 1.96         |
| 6  | TRUE     | Empty    | 14-3-3 protein beta/alpha OS=Homo sapiens GN=YWHAB PE=1 SV=3                                                  | 1433B_HUMAN      | ?                | TRUE                       | .027938477                    | 1.564532112             | 59.679   | 77.195   | 54.86    | 83.464       | 108.43       | 108.08       |
| 7  | TRUE     | Empty    | 14-3-3 protein epsilon OS=Homo sapiens GN=YWHAE PE=1 SV=1                                                     | 1433E_HUMAN      | ?                | TRUE                       | .396415565                    | 1.2                     | 59.679   | 128.31   | 112.71   | 102.09       | 126.22       | 139.09       |
| 8  | TRUE     | Empty    | 14-3-3 protein eta OS=Homo sapiens GN=YWHAH PE=1 SV=4                                                         | 1433F_HUMAN      | 28 kDa           | TRUE                       | .066171799                    | 1.7                     | 37.575   | 70.936   | 47.878   | 68.56        | 92.338       | 105.26       |
| 9  | TRUE     | Empty    | 14-3-3 protein gamma OS=Homo sapiens GN=YWHAG PE=1 SV=2                                                       | 1433G_HUMAN      | 28 kDa           | TRUE                       | 0.06379069                    | 1.6                     | 46.417   | 76.152   | 49.873   | 72.286       | 104.2        | 106.2        |
| 10 | TRUE     | Empty    | 14-3-3 protein sigma OS=Homo sapiens GN=SFN PE=1 SV=1                                                         | 1433S_HUMAN      | ?                | TRUE                       | .068282107                    | 1.6                     | 41.996   | 73.022   | 57.853   | 70.796       | 103.35       | 104.32       |
| 11 | TRUE     | Empty    | 14-3-3 protein theta OS=Homo sapiens GN=YWHAQ PE=1 SV=1                                                       | 1433T_HUMAN      | 28 kDa           | TRUE                       | .068239458                    | 1.6                     | 41.996   | 79.281   | 68.825   | 80.484       | 109.28       | 115.59       |
| 12 | TRUE     | Empty    | 14-3-3 protein zeta/delta OS=Homo sapiens GN=YWHAZ PE=1 SV=1                                                  | 1433Z_HUMAN      | ?                | TRUE                       | .042246178                    | 1.417111594             | 106.1    | 101.19   | 95.756   | 117.74       | 166.04       | 145.67       |
| 13 | TRUE     | Empty    | 1-phosphatidylinositol 4,5-bisphosphate phosphodiesterase eta-1 OS=Homo sapiens GN=PLCH1 PE=1 SV=1            | PLCH1_HUMAN      | ?                | TRUE                       | .625960051                    | 0.6                     | 2.03     | 2.0863   | 0        | 0            | 2.14         | 0            |
| 14 | TRUE     | Empty    | 2,4-dienoyl-CoA reductase, mitochondrial OS=Homo sapiens GN=DECR1 PE=1 SV=1                                   | DECR_HUMAN       | ?                |                            | 0.007360905                   | 4.986205038             | 0        | 2.0863   | 1.49     | 5.17         | 5.99         | 8.81         |
| 15 | TRUE     | Empty    | 2'-5'-oligoadenylate synthase 1 OS=Homo sapiens GN=OAS1 PE=1 SV=4                                             | OAS1_HUMAN       | ?                | TRUE                       | .373900966                    | INF                     | 0        | 0        | 0        | 1.04         | 0            | 0            |
| 16 | TRUE     | Empty    | 26S protease regulatory subunit 10B OS=Homo sapiens GN=PSMC6 PE=1 SV=1                                        | PRS10_HUMAN      | 44 kDa           | TRUE                       | .315162174                    | 1.3                     | 6.631    | 11.475   | 7.97     | 8.74         | 11.86        | 13.157       |
| 17 | TRUE     | Empty    | 26S protease regulatory subunit 4 OS=Homo sapiens GN=PSMC1 PE=1 SV=1                                          | PRS4_HUMAN       | ?                | TRUE                       | .038588035                    | 4.698508276             | 0        | 1.0432   | 2.24     | 3.61         | 6.71         | 8.81         |
| 18 | TRUE     | Empty    | 26S protease regulatory subunit 6A OS=Homo sapiens GN=PSMC3 PE=1 SV=3                                         | PRS6A_HUMAN      | 49 kDa           | TRUE                       | .881302386                    | 1                       | 8.13     | 14.604   | 14.962   | 9.78         | 14.401       | 13.157       |
| 19 | TRUE     | Empty    | 26S protease regulatory subunit 6B OS=Homo sapiens GN=PSMC4 PE=1 SV=2                                         | PRS6B_HUMAN      | ?                | TRUE                       | .574786554                    | 0.6                     | 2.03     | 1.0432   | 6.22     | 4.13         | 0.84713      | 0.93978      |
| 20 | TRUE     | Empty    | 26S protease regulatory subunit 7 OS=Homo sapiens GN=PSMC2 PE=1 SV=3                                          | PRS7_HUMAN       | ?                | TRUE                       | .004910701                    | 22.15988611             | 0        | 0        | 0.99746  | 9.78         | 6.71         | 5.87         |
| 21 | TRUE     | Empty    | 26S protease regulatory subunit 8 OS=Homo sapiens GN=PSMC5 PE=1 SV=1                                          | PRS8_HUMAN       | ?                | TRUE                       | .186604005                    | 2                       | 2.03     | 2.0863   | 4.73     | 5.17         | 3.85         | 9.78         |
| 22 | TRUE     | Empty    | 26S proteasome non-ATPase regulatory subunit 1 OS=Homo sapiens GN=PSMD1 PE=1 SV=2                             | PSMD1_HUMAN      | ?                |                            | 0.038342701                   | 3.655538651             | 4.06     | 1.0432   | 4.73     | 8.74         | 17.79        | 12.217       |

|    |      |       |                                                                                                 |             |        |      |             |             |         |        |         |         |         |         |
|----|------|-------|-------------------------------------------------------------------------------------------------|-------------|--------|------|-------------|-------------|---------|--------|---------|---------|---------|---------|
| 23 | TRUE | Empty | 26S proteasome non-ATPase regulatory subunit 11 OS=Homo sapiens GN=PSMD11 PE=1 SV=3             | PSD11_HUMAN | ?      |      | 0.038714573 | 5.189657513 | 4.06    | 0      | 0       | 10.433  | 5.99    | 6.85    |
| 24 | TRUE | Empty | 26S proteasome non-ATPase regulatory subunit 12 OS=Homo sapiens GN=PSMD12 PE=1 SV=3             | PSD12_HUMAN | ?      |      | 0.150165826 | INF         | 0       | 0      | 0       | 0       | 2.14    | 4.89    |
| 25 | TRUE | Empty | 26S proteasome non-ATPase regulatory subunit 13 OS=Homo sapiens GN=PSMD13 PE=1 SV=2             | PSD13_HUMAN | ?      |      | 0.00945161  | 17.95590801 | 0.99746 | 0      | 0       | 5.65    | 4.57    | 8.81    |
| 26 | TRUE | Empty | 26S proteasome non-ATPase regulatory subunit 2 OS=Homo sapiens GN=PSMD2 PE=1 SV=3               | PSMD2_HUMAN | ?      | TRUE | .009110702  | 4.882133883 | 0       | 2.0863 | 8.71    | 16.395  | 16.943  | 20.675  |
| 27 | TRUE | Empty | 26S proteasome non-ATPase regulatory subunit 3 OS=Homo sapiens GN=PSMD3 PE=1 SV=2               | PSMD3_HUMAN | ?      |      | 0.062928597 | 5.8         | 0       | 1.0432 | 3.98    | 8.26    | 5.0828  | 15.037  |
| 28 | TRUE | Empty | 26S proteasome non-ATPase regulatory subunit 4 OS=Homo sapiens GN=PSMD4 PE=1 SV=1               | PSMD4_HUMAN | ?      | TRUE | .985320714  | 1           | 2.03    | 9.86   | 15.959  | 12.669  | 7.42    | 7.83    |
| 29 | TRUE | Empty | 26S proteasome non-ATPase regulatory subunit 5 OS=Homo sapiens GN=PSMD5 PE=1 SV=3               | PSMD5_HUMAN | ?      |      | 0.004670138 | 26.62482706 | 0.99746 | 0      | 0       | 5.17    | 9.85    | 11.277  |
| 30 | TRUE | Empty | 26S proteasome non-ATPase regulatory subunit 6 OS=Homo sapiens GN=PSMD6 PE=1 SV=1               | PSMD6_HUMAN | ?      |      | 0.050468881 | 4.9         | 4.06    | 2.0863 | 1.49    | 6.707   | 20.331  | 15.037  |
| 31 | TRUE | Empty | 26S proteasome non-ATPase regulatory subunit 7 OS=Homo sapiens GN=PSMD7 PE=1 SV=2               | PSMD7_HUMAN | 37 kDa | TRUE | .184903748  | 5           | 0       | 2.0863 | 2.24    | 4.13    | 4.57    | 16.916  |
| 32 | TRUE | Empty | 26S proteasome non-ATPase regulatory subunit 8 OS=Homo sapiens GN=PSMD8 PE=1 SV=2               | PSMD8_HUMAN | 40 kDa |      | 0.136121777 | INF         | 0       | 0      | 0       | 1.04    | 0       | 0.93978 |
| 33 | TRUE | Empty | 26S proteasome non-ATPase regulatory subunit 9 OS=Homo sapiens GN=PSMD9 PE=1 SV=3               | PSMD9_HUMAN | ?      |      | 0.450690138 | 0.5         | 0       | 2.0863 | 4.73    | 0.74522 | 1.43    | 0.93978 |
| 34 | TRUE | Empty | 28 kDa heat- and acid-stable phosphoprotein OS=Homo sapiens GN=PDAP1 PE=1 SV=1                  | HAP28_HUMAN | 21 kDa | TRUE | .459398381  | 0.7         | 2.03    | 8.54   | 12.967  | 2.09    | 6.71    | 5.87    |
| 35 | TRUE | Empty | 28S ribosomal protein S18c, mitochondrial OS=Homo sapiens GN=MRPS18C PE=1 SV=1                  | RT18C_HUMAN | 16 kDa |      | 0.388590446 | 3           | 0       | 1.0432 | 0       | 2.57    | 0       | 0.93978 |
| 36 | TRUE | Empty | 28S ribosomal protein S22, mitochondrial OS=Homo sapiens GN=MRPS22 PE=1 SV=1                    | RT22_HUMAN  | ?      |      | 0.373900966 | INF         | 0       | 0      | 0       | 0       | 0       | 1.96    |
| 37 | TRUE | Empty | 28S ribosomal protein S23, mitochondrial OS=Homo sapiens GN=MRPS23 PE=1 SV=2                    | RT23_HUMAN  | 22 kDa | TRUE | 0.1639255   | 2           | 2.03    | 1.0432 | 0       | 2.57    | 2.14    | 1.96    |
| 38 | TRUE | Empty | 28S ribosomal protein S25, mitochondrial OS=Homo sapiens GN=MRPS25 PE=1 SV=1                    | RT25_HUMAN  | ?      |      | 0.053421057 | INF         | 0       | 0      | 0       | 2.57    | 0.84713 | 3.91    |
| 39 | TRUE | Empty | 28S ribosomal protein S27, mitochondrial OS=Homo sapiens GN=MRPS27 PE=1 SV=3                    | RT27_HUMAN  | ?      |      | 0.373900966 | INF         | 0       | 0      | 0       | 0       | 0       | 3.91    |
| 40 | TRUE | Empty | 28S ribosomal protein S29, mitochondrial OS=Homo sapiens GN=DAP3 PE=1 SV=1                      | RT29_HUMAN  | ?      |      | 0.136121777 | INF         | 0       | 0      | 0       | 1.04    | 0       | 0.93978 |
| 41 | TRUE | Empty | 2-oxoglutarate dehydrogenase, mitochondrial OS=Homo sapiens GN=OGDH PE=1 SV=3                   | ODO1_HUMAN  | ?      | TRUE | .084566581  | INF         | 0       | 0      | 0       | 2.09    | 0.84713 | 0.93978 |
| 42 | TRUE | Empty | 2-oxoisovalerate dehydrogenase subunit alpha, mitochondrial OS=Homo sapiens GN=BCKDHA PE=1 SV=2 | ODBA_HUMAN  | ?      |      | 0.192836343 | INF         | 0       | 0      | 0       | 0       | 2.14    | 0.93978 |
| 43 | TRUE | Empty | 3'(2'),5'-bisphosphate nucleotidase 1 OS=Homo sapiens GN=BPNT1 PE=1 SV=1                        | BPNT1_HUMAN | ?      |      | 0.360920531 | 4.5         | 0       | 1.0432 | 0       | 3.61    | 0       | 0.93978 |
| 44 | TRUE | Empty | 39S ribosomal protein L12, mitochondrial OS=Homo sapiens GN=MRPL12 PE=1 SV=2                    | RM12_HUMAN  | 21 kDa |      | 0.728175975 | 1.1         | 2.03    | 8.54   | 4.73    | 5.17    | 5.99    | 5.87    |
| 45 | TRUE | Empty | 39S ribosomal protein L46, mitochondrial OS=Homo sapiens GN=MRPL46 PE=1 SV=1                    | RM46_HUMAN  | 32 kDa | TRUE | 0.03308882  | 3.48079121  | 0       | 0      | 0.99746 | 0.74522 | 0.84713 | 1.96    |
| 46 | TRUE | Empty | 39S ribosomal protein L53, mitochondrial OS=Homo sapiens GN=MRPL53 PE=1 SV=1                    | RM53_HUMAN  | 12 kDa |      | 0.968461748 | 0.9         | 0       | 0      | 1.49    | 0       | 0       | 1.96    |
| 47 | TRUE | Empty | 3-hydroxyacyl-CoA dehydrogenase type-2 OS=Homo sapiens GN=HSD17B10 PE=1 SV=3                    | HCD2_HUMAN  | ?      |      | 0.234985525 | 1.4         | 35.365  | 20.863 | 14.962  | 31.299  | 29.65   | 37.591  |
| 48 | TRUE | Empty | 3-hydroxyisobutyrate dehydrogenase, mitochondrial OS=Homo sapiens GN=HIBADH PE=1 SV=2           | 3HIDH_HUMAN | 35 kDa | TRUE | .800719764  | 1.1         | 2.03    | 11.475 | 4.73    | 6.707   | 7.42    | 6.85    |

|    |      |       |                                                                                               |             |        |      |             |             |        |        |         |         |        |         |
|----|------|-------|-----------------------------------------------------------------------------------------------|-------------|--------|------|-------------|-------------|--------|--------|---------|---------|--------|---------|
| 49 | TRUE | Empty | 3-ketoacyl-CoA thiolase, mitochondrial OS=Homo sapiens<br>GN=ACAA2 PE=1 SV=2                  | THIM_HUMAN  | 42 kDa |      | 0.994822471 | 1           | 0      | 4.1727 | 1.49    | 0.74522 | 1.43   | 3.91    |
| 50 | TRUE | Empty | 3-ketoacyl-CoA thiolase, peroxisomal OS=Homo sapiens<br>GN=ACAA1 PE=1 SV=2                    | THIK_HUMAN  | ?      |      | 0.000706428 | 17.47288112 | 0      | 0      | 0.99746 | 6.707   | 5.0828 | 5.87    |
| 51 | TRUE | Empty | 3-mercaptopyruvate sulfurtransferase OS=Homo sapiens<br>GN=MPST PE=1 SV=3                     | THTM_HUMAN  | ?      | TRUE | .356219975  | 1.3         | 2.03   | 3.1295 | 4.73    | 5.65    | 4.57   | 3.91    |
| 52 | TRUE | Empty | 3-oxoacyl-[acyl-carrier-protein] synthase, mitochondrial<br>OS=Homo sapiens GN=OXSM PE=1 SV=1 | OXSM_HUMAN  | ?      | TRUE | .373900966  | INF         | 0      | 0      | 0       | 2.57    | 0      | 0       |
| 53 | TRUE | Empty | 40S ribosomal protein S10 OS=Homo sapiens GN=RPS10 PE=1<br>SV=1                               | RS10_HUMAN  | 19 kDa | TRUE | .864900777  | 0.9         | 26.524 | 3.1295 | 5.47    | 8.26    | 8.13   | 14.097  |
| 54 | TRUE | Empty | 40S ribosomal protein S11 OS=Homo sapiens GN=RPS11 PE=1<br>SV=3                               | RS11_HUMAN  | 18 kDa |      | 0.038076528 | 4.703644293 | 0      | 0      | 1.49    | 2.57    | 3.85   | 3.91    |
| 55 | TRUE | Empty | 40S ribosomal protein S12 OS=Homo sapiens GN=RPS12 PE=1<br>SV=3                               | RS12_HUMAN  | 15 kDa |      | 0.400534658 | 0.5         | 2.03   | 50.072 | 32.916  | 12.669  | 18.637 | 14.097  |
| 56 | TRUE | Empty | 40S ribosomal protein S13 OS=Homo sapiens GN=RPS13 PE=1<br>SV=2                               | RS13_HUMAN  | 17 kDa | TRUE | .046374213  | 5.174745601 | 0      | 0      | 1.49    | 2.57    | 3.85   | 4.89    |
| 57 | TRUE | Empty | 40S ribosomal protein S14 OS=Homo sapiens GN=RPS14 PE=1<br>SV=3                               | RS14_HUMAN  | 16 kDa |      | 0.314645447 | 2.4         | 0      | 0      | 2.24    | 2.09    | 3.85   | 0.93978 |
| 58 | TRUE | Empty | 40S ribosomal protein S15 OS=Homo sapiens GN=RPS15 PE=1<br>SV=2                               | RS15_HUMAN  | 17 kDa | TRUE | .550821271  | 1.5         | 0      | 1.0432 | 3.98    | 2.09    | 1.43   | 2.94    |
| 59 | TRUE | Empty | 40S ribosomal protein S15a OS=Homo sapiens GN=RPS15A PE=1<br>SV=2                             | RS15A_HUMAN | 15 kDa |      | 0.236171395 | 3           | 6.631  | 0      | 0       | 4.13    | 4.57   | 11.277  |
| 60 | TRUE | Empty | 40S ribosomal protein S16 OS=Homo sapiens GN=RPS16 PE=1<br>SV=2                               | RS16_HUMAN  | 16 kDa |      | 0.218969151 | 2.8         | 11.052 | 0      | 2.24    | 23.102  | 9.85   | 7.83    |
| 61 | TRUE | Empty | 40S ribosomal protein S17 OS=Homo sapiens GN=RPS17 PE=1<br>SV=2                               | RS17_HUMAN  | 16 kDa |      | 0.981470778 | 1           | 2.03   | 11.475 | 17.954  | 8.26    | 12.707 | 10.338  |
| 62 | TRUE | Empty | 40S ribosomal protein S18 OS=Homo sapiens GN=RPS18 PE=1<br>SV=3                               | RS18_HUMAN  | 18 kDa | TRUE | 0.73326517  | 1.2         | 8.13   | 1.0432 | 9.46    | 5.65    | 11.86  | 6.85    |
| 63 | TRUE | Empty | 40S ribosomal protein S19 OS=Homo sapiens GN=RPS19 PE=1<br>SV=2                               | RS19_HUMAN  | 16 kDa | TRUE | .314449511  | 0.7         | 6.631  | 13.561 | 11.969  | 2.57    | 8.13   | 10.338  |
| 64 | TRUE | Empty | 40S ribosomal protein S2 OS=Homo sapiens GN=RPS2 PE=1 SV=2                                    | RS2_HUMAN   | 31 kDa |      | 0.772904383 | 0.9         | 8.13   | 10.432 | 20.947  | 13.414  | 11.013 | 12.217  |
| 65 | TRUE | Empty | 40S ribosomal protein S20 OS=Homo sapiens GN=RPS20 PE=1<br>SV=1                               | RS20_HUMAN  | ?      |      | 0.364088797 | 0.6         | 6.631  | 2.0863 | 6.22    | 5.65    | 3.85   | 0.93978 |
| 66 | TRUE | Empty | 40S ribosomal protein S21 OS=Homo sapiens GN=RPS21 PE=1<br>SV=1                               | RS21_HUMAN  | 9 kDa  |      | 0.865712078 | 0.9         | 4.06   | 17.734 | 20.947  | 7.22    | 5.99   | 25.374  |
| 67 | TRUE | Empty | 40S ribosomal protein S24 OS=Homo sapiens GN=RPS24 PE=1<br>SV=1                               | RS24_HUMAN  | ?      |      | 0.21264754  | 2.4         | 4.06   | 0      | 4.73    | 4.13    | 12.707 | 5.87    |
| 68 | TRUE | Empty | 40S ribosomal protein S25 OS=Homo sapiens GN=RPS25 PE=1<br>SV=1                               | RS25_HUMAN  | 14 kDa |      | 0.62678517  | 0.8         | 22.103 | 6.259  | 15.959  | 11.178  | 14.401 | 11.277  |
| 69 | TRUE | Empty | 40S ribosomal protein S26 OS=Homo sapiens GN=RPS26 PE=1<br>SV=3                               | RS26_HUMAN  | 13 kDa | TRUE | .358712293  | 2.4         | 8.13   | 1.0432 | 6.22    | 28.318  | 5.0828 | 7.83    |
| 70 | TRUE | Empty | 40S ribosomal protein S28 OS=Homo sapiens GN=RPS28 PE=1<br>SV=1                               | RS28_HUMAN  | 8 kDa  |      | 0.30958028  | 0.6         | 8.13   | 3.1295 | 8.71    | 2.57    | 6.71   | 3.91    |
| 71 | TRUE | Empty | 40S ribosomal protein S3 OS=Homo sapiens GN=RPS3 PE=1 SV=2                                    | RS3_HUMAN   | ?      |      | 0.394474769 | 1.6         | 33.155 | 4.1727 | 7.97    | 17.885  | 22.873 | 33.832  |
| 72 | TRUE | Empty | 40S ribosomal protein S3a OS=Homo sapiens GN=RPS3A PE=1<br>SV=2                               | RS3A_HUMAN  | 30 kDa |      | 0.138939551 | 2.6         | 2.03   | 2.0863 | 3.98    | 11.923  | 4.57   | 5.87    |
| 73 | TRUE | Empty | 40S ribosomal protein S4, X isoform OS=Homo sapiens GN=RPS4X<br>PE=1 SV=2                     | RS4X_HUMAN  | 30 kDa | TRUE | .373104626  | 1.5         | 4.06   | 5.59   | 13.964  | 11.178  | 17.79  | 7.83    |
| 74 | TRUE | Empty | 40S ribosomal protein S5 OS=Homo sapiens GN=RPS5 PE=1 SV=4                                    | RS5_HUMAN   | 23 kDa | TRUE | .046990761  | 6.267678335 | 0      | 3.1295 | 2.24    | 19.376  | 6.71   | 12.217  |

|     |      |       |                                                                                               |             |        |      |             |             |         |         |         |         |         |         |
|-----|------|-------|-----------------------------------------------------------------------------------------------|-------------|--------|------|-------------|-------------|---------|---------|---------|---------|---------|---------|
| 75  | TRUE | Empty | 40S ribosomal protein S6 OS=Homo sapiens GN=RPS6 PE=1 SV=1                                    | RS6_HUMAN   | 29 kDa |      | 0.088101989 | 3.1         | 2.03    | 1.0432  | 5.47    | 11.178  | 12.707  | 4.89    |
| 76  | TRUE | Empty | 40S ribosomal protein S7 OS=Homo sapiens GN=RPS7 PE=1 SV=1                                    | RS7_HUMAN   | 22 kDa |      | 0.151551581 | 0.7         | 15.472  | 9.86    | 9.46    | 6.707   | 7.42    | 9.78    |
| 77  | TRUE | Empty | 40S ribosomal protein S8 OS=Homo sapiens GN=RPS8 PE=1 SV=2                                    | RS8_HUMAN   | 24 kDa | TRUE | .994000394  | 1           | 4.06    | 5.59    | 24.936  | 14.904  | 16.096  | 3.91    |
| 78  | TRUE | Empty | 40S ribosomal protein S9 OS=Homo sapiens GN=RPS9 PE=1 SV=3                                    | RS9_HUMAN   | 23 kDa |      | 0.41505911  | 2           | 8.13    | 0       | 0       | 5.17    | 3.85    | 8.81    |
| 79  | TRUE | Empty | 40S ribosomal protein SA OS=Homo sapiens GN=RPSA PE=1 SV=4                                    | RSSA_HUMAN  | 33 kDa |      | 0.261617919 | 0.6         | 59.679  | 18.777  | 35.908  | 20.121  | 27.108  | 19.735  |
| 80  | TRUE | Empty | 4-aminobutyrate aminotransferase, mitochondrial OS=Homo sapiens GN=ABAT PE=1 SV=3             | GABT_HUMAN  | 56 kDa |      | 0.339979506 | 1.7         | 6.631   | 3.1295  | 2.24    | 3.61    | 5.99    | 12.217  |
| 81  | TRUE | Empty | 4F2 cell-surface antigen heavy chain OS=Homo sapiens GN=SLC3A2 PE=1 SV=3                      | 4F2_HUMAN   | ?      |      | 0.83444122  | 1.1         | 33.155  | 8.54    | 2.24    | 11.178  | 22.025  | 17.856  |
| 82  | TRUE | Empty | 4-hydroxyphenylpyruvate dioxygenase-like protein OS=Homo sapiens GN=HPDL PE=1 SV=1            | HPDL_HUMAN  | 39 kDa |      | 0.036639133 | 5.722164297 | 0.99746 | 0       | 0       | 2.09    | 0.84713 | 1.96    |
| 83  | TRUE | Empty | 4-trimethylaminobutyraldehyde dehydrogenase OS=Homo sapiens GN=ALDH9A1 PE=1 SV=3              | AL9A1_HUMAN | ?      |      | 0.037589604 | 5.755463957 | 0       | 1.0432  | 0       | 1.04    | 1.43    | 2.94    |
| 84  | TRUE | Empty | 5'-3' exoribonuclease 2 OS=Homo sapiens GN=XRN2 PE=1 SV=1                                     | XRN2_HUMAN  | ?      |      | 0.738892649 | 0.8         | 0       | 3.1295  | 9.46    | 3.61    | 3.85    | 2.94    |
| 85  | TRUE | Empty | 5'-AMP-activated protein kinase catalytic subunit alpha-1 OS=Homo sapiens GN=PRKAA1 PE=1 SV=4 | AAPK1_HUMAN | ?      | TRUE | .003651919  | 4.134982856 | 0       | 0.99746 | 0       | 1.04    | 1.43    | 0.93978 |
| 86  | TRUE | Empty | 5'-AMP-activated protein kinase subunit beta-1 OS=Homo sapiens GN=PRKAB1 PE=1 SV=4            | AAKB1_HUMAN | 30 kDa | TRUE | .373900966  | INF         | 0       | 0       | 0       | 0       | 0       | 1.96    |
| 87  | TRUE | Empty | 5'-AMP-activated protein kinase subunit gamma-1 OS=Homo sapiens GN=PRKAG1 PE=1 SV=1           | AAKG1_HUMAN | ?      | TRUE | .458310893  | 2.3         | 0       | 0       | 0.99746 | 1.04    | 0.84713 | 0       |
| 88  | TRUE | Empty | 5'-nucleotidase domain-containing protein 1 OS=Homo sapiens GN=NT5DC1 PE=1 SV=1               | NT5D1_HUMAN | ?      |      | 0.4598504   | 1.9         | 0       | 0       | 2.24    | 2.57    | 2.14    | 0.93978 |
| 89  | TRUE | Empty | 60 kDa heat shock protein, mitochondrial OS=Homo sapiens GN=HSPD1 PE=1 SV=2                   | CH60_HUMAN  | ?      |      | 0.148347207 | 1.7         | 172.4   | 78.238  | 66.83   | 219.84  | 164.34  | 147.55  |
| 90  | TRUE | Empty | 60 kDa SS-A/Ro ribonucleoprotein OS=Homo sapiens GN=TROVE2 PE=1 SV=2                          | RO60_HUMAN  | ?      | TRUE | .678870175  | 1.1         | 4.06    | 5.59    | 7.97    | 4.13    | 7.42    | 7.83    |
| 91  | TRUE | Empty | 60S acidic ribosomal protein P0 OS=Homo sapiens GN=RPLP0 PE=1 SV=1                            | RLA0_HUMAN  | ?      | TRUE | 0.23991139  | 1.4         | 11.052  | 22.95   | 31.919  | 24.592  | 33.885  | 36.652  |
| 92  | TRUE | Empty | 60S acidic ribosomal protein P1 OS=Homo sapiens GN=RPLP1 PE=1 SV=1                            | RLA1_HUMAN  | ?      | TRUE | .088915969  | 0.4         | 26.524  | 40.684  | 27.929  | 11.923  | 25.414  | 0       |
| 93  | TRUE | Empty | 60S acidic ribosomal protein P2 OS=Homo sapiens GN=RPLP2 PE=1 SV=1                            | RLA2_HUMAN  | 12 kDa | TRUE | .562490765  | 0.8         | 37.575  | 64.677  | 25.934  | 18.63   | 54.217  | 25.374  |
| 94  | TRUE | Empty | 60S ribosomal protein L10 OS=Homo sapiens GN=RPL10 PE=1 SV=4                                  | RL10_HUMAN  | 25 kDa | TRUE | .060356148  | 4.1         | 0       | 0       | 2.24    | 4.13    | 5.0828  | 2.94    |
| 95  | TRUE | Empty | 60S ribosomal protein L10a OS=Homo sapiens GN=RPL10A PE=1 SV=2                                | RL10A_HUMAN | 25 kDa |      | 0.292851619 | 2           | 0       | 2.0863  | 6.22    | 8.74    | 3.85    | 6.85    |
| 96  | TRUE | Empty | 60S ribosomal protein L11 OS=Homo sapiens GN=RPL11 PE=1 SV=2                                  | RL11_HUMAN  | ?      | TRUE | .528645098  | 0.8         | 11.052  | 6.259   | 7.97    | 3.61    | 10.166  | 6.85    |
| 97  | TRUE | Empty | 60S ribosomal protein L12 OS=Homo sapiens GN=RPL12 PE=1 SV=1                                  | RL12_HUMAN  | ?      |      | 0.529566289 | 0.8         | 35.365  | 30.252  | 18.952  | 38.006  | 9.85    | 16.916  |
| 98  | TRUE | Empty | 60S ribosomal protein L13 OS=Homo sapiens GN=RPL13 PE=1 SV=4                                  | RL13_HUMAN  | ?      | TRUE | .346367754  | 1.7         | 2.03    | 3.1295  | 15.959  | 12.669  | 12.707  | 10.338  |
| 99  | TRUE | Empty | 60S ribosomal protein L13a OS=Homo sapiens GN=RPL13A PE=1 SV=2                                | RL13A_HUMAN | 24 kDa |      | 0.984363485 | 1           | 6.631   | 0       | 2.24    | 0.74522 | 3.85    | 5.87    |
| 100 | TRUE | Empty | 60S ribosomal protein L14 OS=Homo sapiens GN=RPL14 PE=1 SV=4                                  | RL14_HUMAN  | 23 kDa |      | 0.864007608 | 0.8         | 0       | 0       | 8.71    | 3.61    | 1.43    | 1.96    |

|     |      |       |                                                                                    |             |        |                 |             |        |         |         |         |        |        |
|-----|------|-------|------------------------------------------------------------------------------------|-------------|--------|-----------------|-------------|--------|---------|---------|---------|--------|--------|
| 101 | TRUE | Empty | 60S ribosomal protein L15 OS=Homo sapiens GN=RPL15 PE=1 SV=2                       | RL15_HUMAN  | ?      | 0.9604117       | 1           | 2.03   | 2.0863  | 4.73    | 1.04    | 4.57   | 3.91   |
| 102 | TRUE | Empty | 60S ribosomal protein L17 OS=Homo sapiens GN=RPL17 PE=1 SV=3                       | RL17_HUMAN  | ?      | TRUE .251980677 | 2           | 0      | 3.1295  | 0.99746 | 2.09    | 3.85   | 1.96   |
| 103 | TRUE | Empty | 60S ribosomal protein L18 OS=Homo sapiens GN=RPL18 PE=1 SV=2                       | RL18_HUMAN  | ?      | TRUE .383730047 | 1.5         | 6.631  | 0       | 5.47    | 7.22    | 5.99   | 5.87   |
| 104 | TRUE | Empty | 60S ribosomal protein L18a OS=Homo sapiens GN=RPL18A PE=1 SV=2                     | RL18A_HUMAN | 21 kDa | TRUE .210232473 | 2.4         | 0      | 6.259   | 6.22    | 3.61    | 14.401 | 13.157 |
| 105 | TRUE | Empty | 60S ribosomal protein L21 OS=Homo sapiens GN=RPL21 PE=1 SV=2                       | RL21_HUMAN  | 19 kDa | TRUE .231293643 | 2.7         | 0      | 0       | 6.22    | 3.61    | 5.99   | 9.78   |
| 106 | TRUE | Empty | 60S ribosomal protein L22 OS=Homo sapiens GN=RPL22 PE=1 SV=2                       | RL22_HUMAN  | 15 kDa | TRUE .553223062 | 0.8         | 15.472 | 6.259   | 14.962  | 11.178  | 11.013 | 8.81   |
| 107 | TRUE | Empty | 60S ribosomal protein L23 OS=Homo sapiens GN=RPL23 PE=1 SV=1                       | RL23_HUMAN  | 15 kDa | 0.53560817      | 1.4         | 15.472 | 1.0432  | 11.969  | 8.74    | 15.248 | 15.037 |
| 108 | TRUE | Empty | 60S ribosomal protein L23a OS=Homo sapiens GN=RPL23A PE=1 SV=1                     | RL23A_HUMAN | 18 kDa | TRUE 0.16626643 | 2           | 8.13   | 0       | 4.73    | 10.433  | 7.42   | 9.78   |
| 109 | TRUE | Empty | 60S ribosomal protein L24 OS=Homo sapiens GN=RPL24 PE=1 SV=1                       | RL24_HUMAN  | 18 kDa | 0.744157408     | 1.2         | 2.03   | 1.0432  | 7.97    | 2.57    | 5.99   | 5.87   |
| 110 | TRUE | Empty | 60S ribosomal protein L27 OS=Homo sapiens GN=RPL27 PE=1 SV=2                       | RL27_HUMAN  | 16 kDa | TRUE .724509257 | 1.3         | 2.03   | 0       | 4.73    | 2.57    | 5.0828 | 1.96   |
| 111 | TRUE | Empty | 60S ribosomal protein L27a OS=Homo sapiens GN=RPL27A PE=1 SV=2                     | RL27A_HUMAN | 17 kDa | 0.788325767     | 0.9         | 6.631  | 4.1727  | 11.969  | 2.57    | 9.85   | 8.81   |
| 112 | TRUE | Empty | 60S ribosomal protein L3 OS=Homo sapiens GN=RPL3 PE=1 SV=2                         | RL3_HUMAN   | 46 kDa | TRUE .145654847 | 2.4         | 0      | 2.0863  | 7.97    | 8.26    | 5.99   | 9.78   |
| 113 | TRUE | Empty | 60S ribosomal protein L30 OS=Homo sapiens GN=RPL30 PE=1 SV=2                       | RL30_HUMAN  | 13 kDa | 0.413689219     | 1.8         | 0      | 3.1295  | 17.954  | 7.22    | 14.401 | 15.976 |
| 114 | TRUE | Empty | 60S ribosomal protein L31 OS=Homo sapiens GN=RPL31 PE=1 SV=1                       | RL31_HUMAN  | ?      | 0.730226587     | 1.2         | 19.893 | 0       | 6.22    | 11.923  | 10.166 | 11.277 |
| 115 | TRUE | Empty | 60S ribosomal protein L32 OS=Homo sapiens GN=RPL32 PE=1 SV=2                       | RL32_HUMAN  | 16 kDa | 0.166541107     | 2.4         | 0      | 2.0863  | 4.73    | 4.13    | 4.57   | 8.81   |
| 116 | TRUE | Empty | 60S ribosomal protein L36 OS=Homo sapiens GN=RPL36 PE=1 SV=3                       | RL36_HUMAN  | 12 kDa | 0.681500123     | 1.5         | 0      | 0       | 6.22    | 0.74522 | 4.57   | 5.87   |
| 117 | TRUE | Empty | 60S ribosomal protein L38 OS=Homo sapiens GN=RPL38 PE=1 SV=2                       | RL38_HUMAN  | 8 kDa  | 0.196156141     | 2.1         | 2.03   | 0       | 5.47    | 4.13    | 6.71   | 5.87   |
| 118 | TRUE | Empty | 60S ribosomal protein L4 OS=Homo sapiens GN=RPL4 PE=1 SV=5                         | RL4_HUMAN   | 48 kDa | TRUE .197322838 | 2.2         | 0      | 6.259   | 23.939  | 23.102  | 25.414 | 16.916 |
| 119 | TRUE | Empty | 60S ribosomal protein L5 OS=Homo sapiens GN=RPL5 PE=1 SV=3                         | RL5_HUMAN   | 34 kDa | TRUE .983841311 | 1           | 4.06   | 12.518  | 28.926  | 13.414  | 16.943 | 15.037 |
| 120 | TRUE | Empty | 60S ribosomal protein L6 OS=Homo sapiens GN=RPL6 PE=1 SV=3                         | RL6_HUMAN   | 33 kDa | TRUE .857047964 | 0.9         | 33.155 | 2.0863  | 22.942  | 20.121  | 19.484 | 13.157 |
| 121 | TRUE | Empty | 60S ribosomal protein L7 OS=Homo sapiens GN=RPL7 PE=1 SV=1                         | RL7_HUMAN   | 29 kDa | 0.631734019     | 0.7         | 37.575 | 4.1727  | 16.957  | 11.923  | 13.554 | 17.856 |
| 122 | TRUE | Empty | 60S ribosomal protein L7a OS=Homo sapiens GN=RPL7A PE=1 SV=2                       | RL7A_HUMAN  | 30 kDa | 0.99743936      | 1           | 11.052 | 10.432  | 20.947  | 11.923  | 13.554 | 16.916 |
| 123 | TRUE | Empty | 60S ribosomal protein L9 OS=Homo sapiens GN=RPL9 PE=1 SV=1                         | RL9_HUMAN   | 22 kDa | 0.012513274     | 17.88151906 | 0      | 0.99746 | 0       | 3.61    | 8.13   | 5.87   |
| 124 | TRUE | Empty | 6-phosphogluconate dehydrogenase, decarboxylating OS=Homo sapiens GN=PGD PE=1 SV=3 | 6PGD_HUMAN  | ?      | 0.121859819     | 1.8         | 26.524 | 9.86    | 10.972  | 26.083  | 23.72  | 34.772 |
| 125 | TRUE | Empty | 6-phosphogluconolactonase OS=Homo sapiens GN=PGLS PE=1 SV=2                        | 6PGL_HUMAN  | 28 kDa | 0.515625178     | 0.7         | 2.03   | 10.432  | 9.46    | 2.09    | 6.71   | 6.85   |
| 126 | TRUE | Empty | 78 kDa glucose-regulated protein OS=Homo sapiens GN=HSPA5 PE=1 SV=2                | GRP78_HUMAN | 72 kDa | TRUE .684131215 | 1.1         | 125.99 | 44.856  | 63.837  | 82.719  | 98.268 | 86.46  |

|     |      |       |                                                                                                   |             |         |      |              |             |        |        |         |         |        |         |
|-----|------|-------|---------------------------------------------------------------------------------------------------|-------------|---------|------|--------------|-------------|--------|--------|---------|---------|--------|---------|
| 127 | TRUE | Empty | 7-dehydrocholesterol reductase OS=Homo sapiens GN=DHCR7 PE=1 SV=1                                 | DHCR7_HUMAN | 54 kDa  |      | 0.0000058929 | 15.97858561 | 0      | 0      | 0.99746 | 5.65    | 5.0828 | 5.87    |
| 128 | TRUE | Empty | Abl interactor 1 OS=Homo sapiens GN=ABI1 PE=1 SV=4                                                | ABI1_HUMAN  | ?       | TRUE | .862954764   | 1.1         | 0      | 4.1727 | 1.49    | 1.04    | 1.43   | 3.91    |
| 129 | TRUE | Empty | Acetolactate synthase-like protein OS=Homo sapiens GN=ILVBL PE=1 SV=2                             | ILVBL_HUMAN | 68 kDa  | TRUE | .022978995   | 5.774148306 | 2.03   | 0      | 0       | 2.09    | 5.0828 | 4.89    |
| 130 | TRUE | Empty | Acetyl-CoA acetyltransferase, cytosolic OS=Homo sapiens GN=ACAT2 PE=1 SV=2                        | THIC_HUMAN  | ?       | TRUE | .548000861   | 0.6         | 0      | 18.777 | 5.47    | 3.61    | 3.85   | 6.85    |
| 131 | TRUE | Empty | Acetyl-CoA acetyltransferase, mitochondrial OS=Homo sapiens GN=ACAT1 PE=1 SV=1                    | THIL_HUMAN  | ?       |      | 0.450926579  | 1.3         | 4.06   | 4.1727 | 0.99746 | 3.61    | 5.0828 | 3.91    |
| 132 | TRUE | Empty | Acidic leucine-rich nuclear phosphoprotein 32 family member A OS=Homo sapiens GN=ANP32A PE=1 SV=1 | AN32A_HUMAN | 29 kDa  | TRUE | 0.44716148   | 1.4         | 4.06   | 17.734 | 21.944  | 25.337  | 20.331 | 14.097  |
| 133 | TRUE | Empty | Acidic leucine-rich nuclear phosphoprotein 32 family member B OS=Homo sapiens GN=ANP32B PE=1 SV=1 | AN32B_HUMAN | ?       | TRUE | .767278136   | 1.1         | 11.052 | 15.648 | 19.949  | 18.63   | 17.79  | 13.157  |
| 134 | TRUE | Empty | Acidic leucine-rich nuclear phosphoprotein 32 family member E OS=Homo sapiens GN=ANP32E PE=1 SV=1 | AN32E_HUMAN | ?       | TRUE | .144728695   | 2.4         | 0      | 6.259  | 1.49    | 5.65    | 5.99   | 8.81    |
| 135 | TRUE | Empty | Aconitate hydratase, mitochondrial OS=Homo sapiens GN=ACO2 PE=1 SV=2                              | ACON_HUMAN  | 85 kDa  | TRUE | .020046247   | 15.41725984 | 0      | 0      | 0.99746 | 4.13    | 3.85   | 7.83    |
| 136 | TRUE | Empty | Actin, alpha cardiac muscle 1 OS=Homo sapiens GN=ACTC1 PE=1 SV=1                                  | ACTC_HUMAN  | 42 kDa  | TRUE | .121489978   | 0.7         | 316.08 | 230.54 | 192.51  | 204.94  | 149.1  | 138.15  |
| 137 | TRUE | Empty | Actin, cytoplasmic 1 OS=Homo sapiens GN=ACTB PE=1 SV=1                                            | ACTB_HUMAN  | 42 kDa  | TRUE | .176650393   | 0.6         | 778.03 | 346.33 | 409.96  | 351.74  | 261.76 | 237.77  |
| 138 | TRUE | Empty | Actin-like protein 6A OS=Homo sapiens GN=ACTL6A PE=1 SV=1                                         | ACL6A_HUMAN | ?       | TRUE | .018699122   | 3.627208844 | 0      | 1.0432 | 0.99746 | 2.09    | 2.14   | 1.96    |
| 139 | TRUE | Empty | Actin-related protein 2 OS=Homo sapiens GN=ACTR2 PE=1 SV=1                                        | ARP2_HUMAN  | ?       |      | 0.140292063  | 1.7         | 2.03   | 5.59   | 9.46    | 8.26    | 11.013 | 10.338  |
| 140 | TRUE | Empty | Actin-related protein 2/3 complex subunit 1B OS=Homo sapiens GN=ARPC1B PE=1 SV=3                  | ARC1B_HUMAN | 41 kDa  | TRUE | .063396291   | 3.7         | 0      | 0      | 3.98    | 5.17    | 4.57   | 4.89    |
| 141 | TRUE | Empty | Actin-related protein 2/3 complex subunit 2 OS=Homo sapiens GN=ARPC2 PE=1 SV=1                    | ARPC2_HUMAN | 34 kDa  |      | 0.066514209  | 3           | 6.631  | 4.1727 | 0       | 14.904  | 10.166 | 7.83    |
| 142 | TRUE | Empty | Actin-related protein 2/3 complex subunit 3 OS=Homo sapiens GN=ARPC3 PE=1 SV=3                    | ARPC3_HUMAN | 21 kDa  |      | 0.501412314  | 1.8         | 0      | 1.0432 | 2.24    | 4.13    | 1.43   | 0.93978 |
| 143 | TRUE | Empty | Actin-related protein 2/3 complex subunit 4 OS=Homo sapiens GN=ARPC4 PE=1 SV=3                    | ARPC4_HUMAN | ?       |      | 0.139596743  | 2.2         | 4.06   | 4.1727 | 1.49    | 3.61    | 8.13   | 11.277  |
| 144 | TRUE | Empty | Actin-related protein 2/3 complex subunit 5 OS=Homo sapiens GN=ARPC5 PE=1 SV=3                    | ARPC5_HUMAN | ?       | TRUE | .936048318   | 1           | 0      | 6.259  | 7.97    | 3.61    | 4.57   | 5.87    |
| 145 | TRUE | Empty | Actin-related protein 2/3 complex subunit 5-like protein OS=Homo sapiens GN=ARPC5L PE=1 SV=1      | ARP5L_HUMAN | 17 kDa  | TRUE | .598991574   | 0.6         | 0      | 2.0863 | 5.47    | 1.04    | 1.43   | 1.96    |
| 146 | TRUE | Empty | Actin-related protein 3 OS=Homo sapiens GN=ACTR3 PE=1 SV=3                                        | ARP3_HUMAN  | 47 kDa  | TRUE | .392274922   | 1.2         | 30.944 | 15.648 | 26.931  | 35.77   | 26.261 | 27.254  |
| 147 | TRUE | Empty | Activated RNA polymerase II transcriptional coactivator p15 OS=Homo sapiens GN=SUB1 PE=1 SV=3     | TCP4_HUMAN  | 14 kDa  |      | 0.483305995  | 0.7         | 4.06   | 23.993 | 13.964  | 5.17    | 9.85   | 13.157  |
| 148 | TRUE | Empty | Activator of 90 kDa heat shock protein ATPase homolog 1 OS=Homo sapiens GN=AHSA1 PE=1 SV=1        | AHSA1_HUMAN | ?       |      | 0.09127636   | 2.4         | 2.03   | 0      | 0.99746 | 2.57    | 2.14   | 2.94    |
| 149 | TRUE | Empty | Activity-dependent neuroprotector homeobox protein OS=Homo sapiens GN=ADNP PE=1 SV=1              | ADNP_HUMAN  | 124 kDa | TRUE | .002694299   | 0.18639875  | 8.13   | 8.54   | 5.47    | 0.74522 | 1.43   | 1.96    |
| 150 | TRUE | Empty | Acyl carrier protein, mitochondrial OS=Homo sapiens GN=NDUFAB1 PE=1 SV=3                          | ACPM_HUMAN  | 17 kDa  |      | 0.236841901  | INF         | 0      | 0      | 0       | 3.61    | 0      | 0.93978 |
| 151 | TRUE | Empty | Acylamino-acid-releasing enzyme OS=Homo sapiens GN=APEH PE=1 SV=4                                 | ACPH_HUMAN  | 81 kDa  |      | 0.543212036  | 0.6         | 0      | 14.604 | 7.97    | 5.17    | 3.85   | 4.89    |
| 152 | TRUE | Empty | Acyl-CoA dehydrogenase family member 9, mitochondrial OS=Homo sapiens GN=ACAD9 PE=1 SV=1          | ACAD9_HUMAN | 69 kDa  |      | 0.019847808  | 4.183058422 | 0      | 1.0432 | 0.99746 | 2.57    | 2.14   | 3.91    |
| 153 | TRUE | Empty | Acyl-CoA-binding protein OS=Homo sapiens GN=DBI PE=1 SV=2                                         | ACBP_HUMAN  | ?       |      | 0.758037229  | 0.8         | 0      | 12.518 | 13.964  | 6.707   | 11.86  | 2.94    |

|     |      |       |                                                                                     |                |        |      |             |             |        |         |         |         |         |         |
|-----|------|-------|-------------------------------------------------------------------------------------|----------------|--------|------|-------------|-------------|--------|---------|---------|---------|---------|---------|
| 154 | TRUE | Empty | Acyl-coenzyme A thioesterase 9, mitochondrial OS=Homo sapiens<br>GN=ACOT9 PE=1 SV=2 | ACOT9_HUMAN    | ?      |      | 0.840559453 | 1.3         | 0      | 2.0863  | 0       | 0       | 1.43    | 0.93978 |
| 155 | TRUE | Empty | Acylphosphatase-1 OS=Homo sapiens GN=ACYP1 PE=1 SV=2                                | ACYP1_HUMAN    | ?      |      | 0.199673922 | 0.2         | 0      | 2.0863  | 1.49    | 0.74522 | 0       | 0       |
| 156 | TRUE | Empty | Acyl-protein thioesterase 1 OS=Homo sapiens GN=LYPLA1 PE=1<br>SV=1                  | LYPA1_HUMAN    | ?      |      | 0.884130871 | 0.9         | 0      | 9.86    | 2.24    | 2.57    | 5.99    | 2.94    |
| 157 | TRUE | Empty | Adapter molecule crk OS=Homo sapiens GN=CRK PE=1 SV=2                               | CRK_HUMAN      | ?      | TRUE | .409086063  | 2.6         | 0      | 0       | 0.99746 | 0       | 1.43    | 0.93978 |
| 158 | TRUE | Empty | Adenine phosphoribosyltransferase OS=Homo sapiens GN=APRT<br>PE=1 SV=2              | APT_HUMAN      | ?      |      | 0.887260184 | 1           | 19.893 | 20.863  | 23.939  | 24.592  | 22.025  | 16.916  |
| 159 | TRUE | Empty | Adenosine kinase OS=Homo sapiens GN=ADK PE=1 SV=2                                   | ADK_HUMAN      | ?      |      | 0.139868417 | 2.4         | 0      | 10.432  | 6.22    | 9.78    | 11.86   | 19.735  |
| 160 | TRUE | Empty | Adenosylhomocysteinase 2 OS=Homo sapiens GN=AHCYL1 PE=1<br>SV=2                     | SAHH2_HUMAN    | ?      | TRUE | .329975308  | 6.2         | 2.03   | 0       | 0       | 11.178  | 2.14    | 0       |
| 161 | TRUE | Empty | Adenosylhomocysteinase OS=Homo sapiens GN=AHCY PE=1 SV=4                            | SAHH_HUMAN     | ?      |      | 0.002600651 | 1.883231999 | 15.472 | 11.475  | 17.954  | 28.318  | 27.108  | 29.133  |
| 162 | TRUE | Empty | Adenylate kinase 2, mitochondrial OS=Homo sapiens GN=AK2<br>PE=1 SV=2               | KAD2_HUMAN     | ?      |      | 0.337523635 | 0.7         | 6.631  | 12.518  | 13.964  | 4.13    | 7.42    | 11.277  |
| 163 | TRUE | Empty | Adenylate kinase isoenzyme 1 OS=Homo sapiens GN=AK1 PE=1<br>SV=3                    | KAD1_HUMAN     | 22 kDa | TRUE | .602051864  | 1.5         | 0      | 9.86    | 2.24    | 3.61    | 4.57    | 10.338  |
| 164 | TRUE | Empty | Adenylosuccinate lyase OS=Homo sapiens GN=ADSL PE=1 SV=2                            | PUR8_HUMAN     | ?      | TRUE | .136122783  | INF         | 0      | 0       | 0       | 2.09    | 0       | 1.96    |
| 165 | TRUE | Empty | Adenylyl cyclase-associated protein 1 OS=Homo sapiens GN=CAP1<br>PE=1 SV=5          | CAP1_HUMAN     | ?      | TRUE | .019069428  | 2.151224572 | 4.06   | 5.59    | 2.24    | 11.178  | 8.13    | 7.83    |
| 166 | TRUE | Empty | Adipocyte plasma membrane-associated protein OS=Homo<br>sapiens GN=APMAP PE=1 SV=2  | APMAP_HUMAN    | ?      |      | 0.669298398 | 1.6         | 8.13   | 0       | 0       | 2.09    | 1.43    | 9.78    |
| 167 | TRUE | Empty | ADP/ATP translocase 2 OS=Homo sapiens GN=SLC25A5 PE=1 SV=7                          | ADT2_HUMAN     | 33 kDa | TRUE | .801185623  | 1.3         | 112.73 | 2.0863  | 2.24    | 40.242  | 47.44   | 60.146  |
| 168 | TRUE | Empty | ADP/ATP translocase 3 OS=Homo sapiens GN=SLC25A6 PE=1 SV=4                          | ADT3_HUMAN     | 33 kDa | TRUE | .681630302  | 1.4         | 75.151 | 2.0863  | 0       | 29.809  | 35.58   | 45.11   |
| 169 | TRUE | Empty | ADP-ribosylation factor 1 OS=Homo sapiens GN=ARF1 PE=1 SV=2                         | ARF1_HUMAN     | 21 kDa | TRUE | .026667737  | 1.499405403 | 24.314 | 29.209  | 17.954  | 34.28   | 38.121  | 34.772  |
| 170 | TRUE | Empty | ADP-ribosylation factor 4 OS=Homo sapiens GN=ARF4 PE=1 SV=3                         | ARF4_HUMAN     | 21 kDa | TRUE | .851401055  | 0.9         | 8.13   | 19.82   | 8.71    | 13.414  | 7.42    | 14.097  |
| 171 | TRUE | Empty | ADP-ribosylation factor 6 OS=Homo sapiens GN=ARF6 PE=1 SV=2                         | ARF6_HUMAN     | 20 kDa | TRUE | .262949104  | 3.9         | 0      | 0       | 0.99746 | 2.57    | 1.43    | 0       |
| 172 | TRUE | Empty | ADP-ribosylation factor-like protein 1 OS=Homo sapiens GN=ARL1<br>PE=1 SV=1         | ARL1_HUMAN     | ?      |      | 0.023730014 | 6.571491589 | 0      | 0       | 0.99746 | 2.09    | 1.43    | 1.96    |
| 173 | TRUE | Empty | ADP-ribosylation factor-like protein 3 OS=Homo sapiens GN=ARL3<br>PE=1 SV=2         | ARL3_HUMAN     | 20 kDa |      | 0.24827618  | 0.3         | 0      | 9.86    | 7.97    | 1.04    | 3.85    | 0       |
| 174 | TRUE | Empty | ADP-sugar pyrophosphatase OS=Homo sapiens GN=NUDT5 PE=1<br>SV=1                     | NUDT5_HUMAN    | 24 kDa |      | 0.760233275 | 1.2         | 0      | 4.1727  | 4.73    | 4.13    | 2.14    | 3.91    |
| 175 | TRUE | Empty | Aflatoxin B1 aldehyde reductase member 2 OS=Homo sapiens<br>GN=AKR7A2 PE=1 SV=3     | ARK72_HUMAN    | 40 kDa | TRUE | .936285911  | 1           | 6.631  | 15.648  | 7.97    | 13.414  | 8.13    | 7.83    |
| 176 | TRUE | Empty | AGO3_HUMAN-DECOY                                                                    | AGO3_HUMAN-DEC | ?      | TRUE | .195474009  | 2.1         | 0      | 1.0432  | 0.99746 | 0.74522 | 1.43    | 1.96    |
| 177 | TRUE | Empty | AH receptor-interacting protein OS=Homo sapiens GN=AIP PE=1<br>SV=2                 | AIP_HUMAN      | 38 kDa |      | 0.129938577 | 2.9         | 0      | 1.0432  | 0.99746 | 2.57    | 0.84713 | 2.94    |
| 178 | TRUE | Empty | A-kinase anchor protein 1, mitochondrial OS=Homo sapiens<br>GN=AKAP1 PE=1 SV=1      | AKAP1_HUMAN    | ?      |      | 0.03308882  | 3.48079121  | 0      | 0.99746 | 0       | 0.74522 | 0.84713 | 1.96    |
| 179 | TRUE | Empty | A-kinase anchor protein 8 OS=Homo sapiens GN=AKAP8 PE=1<br>SV=1                     | AKAP8_HUMAN    | 76 kDa | TRUE | .185911451  | 4.6         | 0      | 1.0432  | 0       | 2.09    | 0.84713 | 0.93978 |
| 180 | TRUE | Empty | A-kinase anchor protein 9 OS=Homo sapiens GN=AKAP9 PE=1<br>SV=3                     | AKAP9_HUMAN    | ?      | TRUE | .136121777  | INF         | 0      | 0       | 0       | 1.04    | 0       | 0.93978 |

|     |      |       |                                                                                                             |             |         |      |             |             |        |         |         |         |        |         |
|-----|------|-------|-------------------------------------------------------------------------------------------------------------|-------------|---------|------|-------------|-------------|--------|---------|---------|---------|--------|---------|
| 181 | TRUE | Empty | Alanine--tRNA ligase, cytoplasmic OS=Homo sapiens GN=AARS<br>PE=1 SV=2                                      | SYAC_HUMAN  | ?       | TRUE | .015484022  | 2.17027666  | 11.052 | 8.54    | 10.972  | 20.866  | 17.79  | 27.254  |
| 182 | TRUE | Empty | Alcohol dehydrogenase [NADP(+)] OS=Homo sapiens GN=AKR1A1<br>PE=1 SV=3                                      | AK1A1_HUMAN | 37 kDa  |      | 0.188122049 | 3           | 0      | 4.1727  | 1.49    | 10.433  | 5.0828 | 2.94    |
| 183 | TRUE | Empty | Alcohol dehydrogenase class-3 OS=Homo sapiens GN=ADH5 PE=1<br>SV=4                                          | ADHX_HUMAN  | 40 kDa  | TRUE | 0.00485573  | 6.868646362 | 0      | 0       | 0.99746 | 1.04    | 2.14   | 2.94    |
| 184 | TRUE | Empty | Aldehyde dehydrogenase family 16 member A1 OS=Homo sapiens<br>GN=ALDH16A1 PE=1 SV=2                         | A16A1_HUMAN | ?       | TRUE | .021107574  | 4.040099178 | 2.03   | 1.0432  | 0.99746 | 3.61    | 5.99   | 7.83    |
| 185 | TRUE | Empty | Aldehyde dehydrogenase X, mitochondrial OS=Homo sapiens<br>GN=ALDH1B1 PE=1 SV=3                             | AL1B1_HUMAN | 57 kDa  | TRUE | 0.00734386  | 8.16784633  | 0      | 0       | 0.99746 | 3.61    | 2.14   | 1.96    |
| 186 | TRUE | Empty | Aldo-keto reductase family 1 member C1 OS=Homo sapiens<br>GN=AKR1C1 PE=1 SV=1                               | AK1C1_HUMAN | 37 kDa  | TRUE | .443867849  | 1.7         | 0      | 9.86    | 2.24    | 4.13    | 5.99   | 10.338  |
| 187 | TRUE | Empty | Allograft inflammatory factor 1-like OS=Homo sapiens GN=AIF1L<br>PE=1 SV=1                                  | AIF1L_HUMAN | ?       |      | 0.373900966 | 0           | 0      | 0       | 3.98    | 0       | 0      | 0       |
| 188 | TRUE | Empty | Alpha-2-macroglobulin OS=Homo sapiens GN=A2M PE=1 SV=3                                                      | A2MG_HUMAN  | 163 kDa | TRUE | .856753163  | 1.2         | 0      | 2.0863  | 11.969  | 2.57    | 1.43   | 13.157  |
| 189 | TRUE | Empty | Alpha-2-macroglobulin receptor-associated protein OS=Homo<br>sapiens GN=LRPAP1 PE=1 SV=1                    | AMRP_HUMAN  | 41 kDa  |      | 0.118047874 | INF         | 0      | 0       | 0       | 5.65    | 1.43   | 0.93978 |
| 190 | TRUE | Empty | Alpha-actinin-1 OS=Homo sapiens GN=ACTN1 PE=1 SV=2                                                          | ACTN1_HUMAN | ?       | TRUE | .171008554  | 0.8         | 97.254 | 132.48  | 140.64  | 84.21   | 114.36 | 91.159  |
| 191 | TRUE | Empty | Alpha-actinin-4 OS=Homo sapiens GN=ACTN4 PE=1 SV=2                                                          | ACTN4_HUMAN | ?       | TRUE | .244631272  | 0.8         | 130.41 | 218.02  | 236.4   | 139.36  | 164.34 | 143.79  |
| 192 | TRUE | Empty | Alpha-aminoadipic semialdehyde dehydrogenase OS=Homo<br>sapiens GN=ALDH7A1 PE=1 SV=5                        | AL7A1_HUMAN | ?       |      | 0.005098322 | 7.635977017 | 2.03   | 0       | 0       | 5.65    | 5.0828 | 6.85    |
| 193 | TRUE | Empty | Alpha-endosulfine OS=Homo sapiens GN=ENSA PE=1 SV=1                                                         | ENSA_HUMAN  | ?       | TRUE | .262180901  | 0.3         | 0      | 9.86    | 6.22    | 0.74522 | 2.14   | 1.96    |
| 194 | TRUE | Empty | Alpha-enolase OS=Homo sapiens GN=ENO1 PE=1 SV=2                                                             | ENOA_HUMAN  | ?       | TRUE | 0.99758219  | 1           | 161.35 | 433.96  | 358.09  | 210.9   | 316.83 | 426.66  |
| 195 | TRUE | Empty | Alpha-galactosidase A OS=Homo sapiens GN=GLA PE=1 SV=1                                                      | AGAL_HUMAN  | 49 kDa  |      | 0.766585891 | 1.2         | 0      | 10.432  | 5.47    | 5.65    | 11.013 | 3.91    |
| 196 | TRUE | Empty | Alpha-N-acetylglucosaminidase OS=Homo sapiens GN=NAGLU<br>PE=1 SV=2                                         | ANAG_HUMAN  | 82 kDa  |      | 0.797694301 | 0.8         | 0      | 3.1295  | 1.49    | 0.74522 | 1.43   | 1.96    |
| 197 | TRUE | Empty | Alpha-soluble NSF attachment protein OS=Homo sapiens<br>GN=NAPA PE=1 SV=3                                   | SNA_A_HUMAN | 33 kDa  | TRUE | .015689374  | 5.687621439 | 4.06   | 5.59    | 1.49    | 14.904  | 21.178 | 30.073  |
| 198 | TRUE | Empty | Alpha-taxilin OS=Homo sapiens GN=TXLNA PE=1 SV=3                                                            | TXLNA_HUMAN | 62 kDa  | TRUE | .121394667  | INF         | 0      | 0       | 0       | 1.04    | 0      | 1.96    |
| 199 | TRUE | Empty | Aminoacyl tRNA synthase complex-interacting multifunctional<br>protein 1 OS=Homo sapiens GN=AIMP1 PE=1 SV=2 | AIMP1_HUMAN | ?       |      | 0.185495762 | 5.7         | 0      | 0       | 1.49    | 2.57    | 1.43   | 7.83    |
| 200 | TRUE | Empty | Aminoacyl tRNA synthase complex-interacting multifunctional<br>protein 2 OS=Homo sapiens GN=AIMP2 PE=1 SV=2 | AIMP2_HUMAN | 35 kDa  |      | 0.590356854 | 1.7         | 6.631  | 1.0432  | 0       | 2.57    | 1.43   | 9.78    |
| 201 | TRUE | Empty | Aminopeptidase B OS=Homo sapiens GN=RNPEP PE=1 SV=2                                                         | AMPB_HUMAN  | 73 kDa  |      | 0.119448566 | INF         | 0      | 0       | 0       | 0       | 3.85   | 2.94    |
| 202 | TRUE | Empty | Angio-associated migratory cell protein OS=Homo sapiens<br>GN=AAMP PE=1 SV=2                                | AAMP_HUMAN  | 47 kDa  |      | 0.03048408  | 9.513707822 | 0      | 1.0432  | 0       | 4.13    | 1.43   | 3.91    |
| 203 | TRUE | Empty | Ankyrin repeat domain-containing protein 17 OS=Homo sapiens<br>GN=ANKRD17 PE=1 SV=3                         | ANR17_HUMAN | ?       | TRUE | .840559453  | 1.3         | 0      | 2.0863  | 0       | 0       | 1.43   | 0.93978 |
| 204 | TRUE | Empty | Ankyrin-1 OS=Homo sapiens GN=ANK1 PE=1 SV=3                                                                 | ANK1_HUMAN  | ?       | TRUE | .373900966  | 0           | 0      | 0       | 8.71    | 0       | 0      | 0       |
| 205 | TRUE | Empty | Ankyrin-3 OS=Homo sapiens GN=ANK3 PE=1 SV=3                                                                 | ANK3_HUMAN  | ?       | TRUE | .515839158  | 0.5         | 0      | 2.0863  | 6.22    | 0.74522 | 3.85   | 0       |
| 206 | TRUE | Empty | Annexin A1 OS=Homo sapiens GN=ANXA1 PE=1 SV=2                                                               | ANXA1_HUMAN | 39 kDa  | TRUE | 0.33251746  | 1.3         | 11.052 | 13.561  | 9.46    | 14.159  | 20.331 | 10.338  |
| 207 | TRUE | Empty | Annexin A11 OS=Homo sapiens GN=ANXA11 PE=1 SV=1                                                             | ANX11_HUMAN | ?       | TRUE | 0.05337963  | 2.9         | 2.03   | 2.0863  | 0.99746 | 6.707   | 5.99   | 2.94    |
| 208 | TRUE | Empty | Annexin A2 OS=Homo sapiens GN=ANXA2 PE=1 SV=2                                                               | ANXA2_HUMAN | ?       | TRUE | .904484993  | 0.9         | 172.4  | 49.029  | 50.87   | 87.936  | 90.643 | 78.002  |
| 209 | TRUE | Empty | Annexin A3 OS=Homo sapiens GN=ANXA3 PE=1 SV=3                                                               | ANXA3_HUMAN | 36 kDa  | TRUE | .379559643  | 2.6         | 0      | 2.0863  | 0       | 2.09    | 2.14   | 0       |
| 210 | TRUE | Empty | Annexin A4 OS=Homo sapiens GN=ANXA4 PE=1 SV=4                                                               | ANXA4_HUMAN | ?       | TRUE | .014494473  | 2.777936447 | 4.06   | 1.0432  | 3.98    | 7.22    | 8.13   | 10.338  |
| 211 | TRUE | Empty | Annexin A5 OS=Homo sapiens GN=ANXA5 PE=1 SV=2                                                               | ANXA5_HUMAN | 36 kDa  |      | 0.039563618 | 2.603960706 | 22.103 | 6.259   | 9.46    | 24.592  | 33.885 | 41.35   |
| 212 | TRUE | Empty | Annexin A7 OS=Homo sapiens GN=ANXA7 PE=1 SV=3                                                               | ANXA7_HUMAN | ?       | TRUE | 0.000368    | 13.54219718 | 0      | 0.99746 | 0       | 3.61    | 5.0828 | 4.89    |

|     |      |       |                                                                                                  |                 |        |      |             |             |         |        |         |         |         |         |
|-----|------|-------|--------------------------------------------------------------------------------------------------|-----------------|--------|------|-------------|-------------|---------|--------|---------|---------|---------|---------|
| 213 | TRUE | Empty | Anterior gradient protein 2 homolog OS=Homo sapiens GN=AGR2<br>PE=1 SV=1                         | AGR2_HUMAN      | 20 kDa | TRUE | .009509825  | 0.427507102 | 79.571  | 62.59  | 52.865  | 24.592  | 29.65   | 29.133  |
| 214 | TRUE | Empty | Antithrombin-III OS=Homo sapiens GN=SERPINC1 PE=1 SV=1                                           | ANT3_HUMAN      | 53 kDa |      | 0.781341676 | 0.7         | 0       | 0      | 4.73    | 0.74522 | 0.84713 | 1.96    |
| 215 | TRUE | Empty | AP-1 complex subunit beta-1 OS=Homo sapiens GN=AP1B1 PE=1<br>SV=2                                | AP1B1_HUMAN     | ?      | TRUE | .050255883  | 2.8         | 6.631   | 8.54   | 21.944  | 23.847  | 33.885  | 46.049  |
| 216 | TRUE | Empty | AP-1 complex subunit gamma-1 OS=Homo sapiens GN=AP1G1<br>PE=1 SV=5                               | AP1G1_HUMAN     | ?      | TRUE | .002606621  | 21.79365589 | 0.99746 | 0      | 0       | 8.74    | 5.0828  | 8.81    |
| 217 | TRUE | Empty | AP-1 complex subunit mu-2 OS=Homo sapiens GN=AP1M2 PE=1<br>SV=4                                  | AP1M2_HUMAN     | ?      | TRUE | .173447135  | 2.3         | 2.03    | 1.0432 | 4.73    | 2.09    | 6.71    | 9.78    |
| 218 | TRUE | Empty | AP-2 complex subunit alpha-1 OS=Homo sapiens GN=AP2A1 PE=1<br>SV=3                               | AP2A1_HUMAN     | ?      | TRUE | .333638339  | 2.1         | 0       | 0      | 9.46    | 5.17    | 6.71    | 8.81    |
| 219 | TRUE | Empty | AP-2 complex subunit alpha-2 OS=Homo sapiens GN=AP2A2 PE=1<br>SV=2                               | AP2A2_HUMAN     | ?      | TRUE | .174676845  | 3.3         | 0       | 1.0432 | 1.49    | 2.57    | 5.99    | 1.96    |
| 220 | TRUE | Empty | AP-2 complex subunit beta OS=Homo sapiens GN=AP2B1 PE=1<br>SV=1                                  | AP2B1_HUMAN     | ?      | TRUE | .098576866  | 2           | 4.06    | 7.22   | 15.959  | 13.414  | 20.331  | 21.615  |
| 221 | TRUE | Empty | AP-2 complex subunit mu OS=Homo sapiens GN=AP2M1 PE=1<br>SV=2                                    | AP2M1_HUMAN     | ?      |      | 0.600971946 | 1.5         | 2.03    | 0      | 4.73    | 5.17    | 1.43    | 2.94    |
| 222 | TRUE | Empty | AP-3 complex subunit beta-1 OS=Homo sapiens GN=AP3B1 PE=1<br>SV=3                                | AP3B1_HUMAN     | ?      | TRUE | .041852932  | 14.87458144 | 0       | 0      | 0.99746 | 2.57    | 5.0828  | 7.83    |
| 223 | TRUE | Empty | AP-3 complex subunit delta-1 OS=Homo sapiens GN=AP3D1 PE=1<br>SV=1                               | AP3D1_HUMAN     | ?      | TRUE | .001790582  | 12.39558479 | 0       | 0      | 0.99746 | 5.65    | 3.85    | 3.91    |
| 224 | TRUE | Empty | AP-3 complex subunit mu-1 OS=Homo sapiens GN=AP3M1 PE=1<br>SV=1                                  | AP3M1_HUMAN     | 47 kDa | TRUE | .373900966  | INF         | 0       | 0      | 0       | 0       | 0       | 1.96    |
| 225 | TRUE | Empty | Apoptosis inhibitor 5 OS=Homo sapiens GN=API5 PE=1 SV=3                                          | API5_HUMAN      | ?      |      | 0.403926404 | 2           | 0       | 0      | 2.24    | 1.04    | 2.14    | 1.96    |
| 226 | TRUE | Empty | Apoptosis regulator BAX OS=Homo sapiens GN=BAX PE=1 SV=1                                         | BAX_HUMAN       | ?      |      | 0.996953168 | 1           | 4.06    | 1.0432 | 2.24    | 2.57    | 3.85    | 2.94    |
| 227 | TRUE | Empty | Apoptosis-associated speck-like protein containing a CARD<br>OS=Homo sapiens GN=PYCARD PE=1 SV=2 | ASC_HUMAN       | ?      |      | 0.13736875  | 1.4         | 4.06    | 6.259  | 7.97    | 8.74    | 10.166  | 7.83    |
| 228 | TRUE | Empty | Apoptosis-inducing factor 1, mitochondrial OS=Homo sapiens<br>GN=AIFM1 PE=1 SV=1                 | AIFM1_HUMAN     | ?      |      | 0.047075874 | 5.735665981 | 0       | 2.0863 | 1.49    | 11.178  | 8.13    | 3.91    |
| 229 | TRUE | Empty | Apoptotic chromatin condensation inducer in the nucleus<br>OS=Homo sapiens GN=ACIN1 PE=1 SV=2    | ACINU_HUMAN     | ?      | TRUE | .576584151  | 0.5         | 0       | 1.0432 | 9.46    | 1.04    | 0.84713 | 2.94    |
| 230 | TRUE | Empty | Arf-GAP domain and FG repeat-containing protein 1 OS=Homo<br>sapiens GN=AGFG1 PE=1 SV=2          | AGFG1_HUMAN     | ?      | TRUE | .373900966  | INF         | 0       | 0      | 0       | 1.04    | 0       | 0       |
| 231 | TRUE | Empty | Arginine--tRNA ligase, cytoplasmic OS=Homo sapiens GN=RARS<br>PE=1 SV=2                          | SYRC_HUMAN      | ?      | TRUE | .000718645  | 8.79672299  | 2.03    | 2.0863 | 0       | 11.178  | 14.401  | 12.217  |
| 232 | TRUE | Empty | ARI1_HUMAN-DECOY                                                                                 | ARI1_HUMAN-DECC | ?      |      | 0.153594946 | 0           | 0       | 2.0863 | 3.98    | 0       | 0       | 0       |
| 233 | TRUE | Empty | Asparagine synthetase [glutamine-hydrolyzing] OS=Homo sapiens<br>GN=ASNS PE=1 SV=4               | ASNS_HUMAN      | ?      |      | 0.202194141 | 3.3         | 4.06    | 0      | 0       | 7.22    | 5.0828  | 1.96    |
| 234 | TRUE | Empty | Asparagine--tRNA ligase, cytoplasmic OS=Homo sapiens GN=NARS<br>PE=1 SV=1                        | SYNC_HUMAN      | ?      | TRUE | .033813504  | 29.25738113 | 0       | 1.0432 | 0       | 4.13    | 11.013  | 15.037  |
| 235 | TRUE | Empty | Aspartate aminotransferase, cytoplasmic OS=Homo sapiens<br>GN=GOT1 PE=1 SV=3                     | AATC_HUMAN      | ?      | TRUE | .240827197  | 0.5         | 4.06    | 18.777 | 16.957  | 6.707   | 9.85    | 4.89    |
| 236 | TRUE | Empty | Aspartate aminotransferase, mitochondrial OS=Homo sapiens<br>GN=GOT2 PE=1 SV=3                   | AATM_HUMAN      | ?      | TRUE | .670394191  | 1.1         | 6.631   | 11.475 | 10.972  | 12.669  | 6.71    | 13.157  |
| 237 | TRUE | Empty | Aspartate--tRNA ligase, cytoplasmic OS=Homo sapiens GN=DARS<br>PE=1 SV=2                         | SYDC_HUMAN      | ?      |      | 0.016663436 | 12.34699603 | 2.03    | 0      | 0.99746 | 17.885  | 7.42    | 14.097  |
| 238 | TRUE | Empty | Aspartyl aminopeptidase OS=Homo sapiens GN=DNPEP PE=1 SV=1                                       | DNPEP_HUMAN     | 52 kDa |      | 0.977954822 | 1           | 4.06    | 5.59   | 5.47    | 5.17    | 7.42    | 1.96    |
| 239 | TRUE | Empty | Ataxin-2-like protein OS=Homo sapiens GN=ATXN2L PE=1 SV=2                                        | ATX2L_HUMAN     | ?      |      | 0.836436044 | 0.8         | 0       | 4.1727 | 5.47    | 5.17    | 1.43    | 0.93978 |

|     |      |       |                                                                                         |             |        |      |             |             |         |        |         |         |         |         |
|-----|------|-------|-----------------------------------------------------------------------------------------|-------------|--------|------|-------------|-------------|---------|--------|---------|---------|---------|---------|
| 240 | TRUE | Empty | ATP synthase F(0) complex subunit B1, mitochondrial OS=Homo sapiens GN=ATP5F1 PE=1 SV=2 | AT5F1_HUMAN | 29 kDa |      | 0.344258503 | 2.1         | 4.06    | 0      | 0       | 2.09    | 3.85    | 2.94    |
| 241 | TRUE | Empty | ATP synthase subunit alpha, mitochondrial OS=Homo sapiens GN=ATP5A1 PE=1 SV=1           | ATPA_HUMAN  | ?      |      | 0.592881441 | 1.4         | 53.048  | 8.54   | 9.46    | 40.987  | 29.65   | 27.254  |
| 242 | TRUE | Empty | ATP synthase subunit beta, mitochondrial OS=Homo sapiens GN=ATP5B PE=1 SV=3             | ATPB_HUMAN  | 57 kDa |      | 0.972014445 | 1           | 145.88  | 54.245 | 33.914  | 64.089  | 88.949  | 77.062  |
| 243 | TRUE | Empty | ATP synthase subunit d, mitochondrial OS=Homo sapiens GN=ATP5H PE=1 SV=3                | ATP5H_HUMAN | ?      | TRUE | .211638856  | INF         | 0       | 0      | 0       | 2.09    | 0       | 0.93978 |
| 244 | TRUE | Empty | ATP synthase subunit delta, mitochondrial OS=Homo sapiens GN=ATP5D PE=1 SV=2            | ATPD_HUMAN  | 17 kDa |      | 0.964742757 | 1           | 8.13    | 1.0432 | 0       | 2.57    | 2.14    | 4.89    |
| 245 | TRUE | Empty | ATP synthase subunit e, mitochondrial OS=Homo sapiens GN=ATP5I PE=1 SV=2                | ATP5I_HUMAN | 8 kDa  |      | 0.810945021 | 0.9         | 6.631   | 5.59   | 0       | 2.09    | 2.14    | 4.89    |
| 246 | TRUE | Empty | ATP synthase subunit f, mitochondrial OS=Homo sapiens GN=ATP5J2 PE=1 SV=3               | ATPK_HUMAN  | ?      |      | 0.23631817  | 2.6         | 6.631   | 0      | 0       | 3.61    | 7.42    | 5.87    |
| 247 | TRUE | Empty | ATP synthase subunit gamma, mitochondrial OS=Homo sapiens GN=ATP5C1 PE=1 SV=1           | ATPG_HUMAN  | ?      | TRUE | .412671593  | 1.6         | 8.13    | 1.0432 | 1.49    | 6.707   | 4.57    | 8.81    |
| 248 | TRUE | Empty | ATP synthase subunit O, mitochondrial OS=Homo sapiens GN=ATP5O PE=1 SV=1                | ATPO_HUMAN  | 23 kDa | TRUE | .575834535  | 1.4         | 0       | 16.691 | 10.972  | 11.178  | 16.943  | 9.78    |
| 249 | TRUE | Empty | ATPase ASNA1 OS=Homo sapiens GN=ASNA1 PE=1 SV=2                                         | ASNA_HUMAN  | 39 kDa |      | 0.08219335  | 2.9         | 2.03    | 1.0432 | 0       | 2.57    | 4.57    | 2.94    |
| 250 | TRUE | Empty | ATPase WRNIP1 OS=Homo sapiens GN=WRNIP1 PE=1 SV=2                                       | WRIP1_HUMAN | ?      | TRUE | .373900966  | INF         | 0       | 0      | 0       | 0       | 1.43    | 0       |
| 251 | TRUE | Empty | ATP-binding cassette sub-family E member 1 OS=Homo sapiens GN=ABCE1 PE=1 SV=1           | ABCE1_HUMAN | 67 kDa |      | 0.061930926 | 10          | 0       | 0      | 0.99746 | 2.09    | 1.43    | 5.87    |
| 252 | TRUE | Empty | ATP-binding cassette sub-family F member 1 OS=Homo sapiens GN=ABCF1 PE=1 SV=2           | ABCF1_HUMAN | ?      | TRUE | .432550548  | 2           | 0       | 0      | 2.24    | 0.74522 | 2.14    | 2.94    |
| 253 | TRUE | Empty | ATP-binding cassette sub-family F member 2 OS=Homo sapiens GN=ABCF2 PE=1 SV=2           | ABCF2_HUMAN | ?      | TRUE | .184606477  | INF         | 0       | 0      | 0       | 0.74522 | 0       | 1.96    |
| 254 | TRUE | Empty | ATP-binding cassette sub-family F member 3 OS=Homo sapiens GN=ABCF3 PE=1 SV=2           | ABCF3_HUMAN | ?      |      | 0.005539052 | 6.571491589 | 0.99746 | 0      | 0       | 2.09    | 1.43    | 1.96    |
| 255 | TRUE | Empty | ATP-citrate synthase OS=Homo sapiens GN=ACLY PE=1 SV=3                                  | ACLY_HUMAN  | ?      | TRUE | .006589573  | 8.30722469  | 4.06    | 0      | 1.49    | 23.102  | 16.096  | 14.097  |
| 256 | TRUE | Empty | ATP-dependent 6-phosphofructokinase, liver type OS=Homo sapiens GN=PFKL PE=1 SV=6       | PFKAL_HUMAN | ?      | TRUE | .076190979  | 1.9         | 19.893  | 11.475 | 5.47    | 18.63   | 27.108  | 26.314  |
| 257 | TRUE | Empty | ATP-dependent 6-phosphofructokinase, muscle type OS=Homo sapiens GN=PFKM PE=1 SV=2      | PFKAM_HUMAN | ?      | TRUE | .356080741  | 2.2         | 6.631   | 0      | 0       | 2.09    | 4.57    | 7.83    |
| 258 | TRUE | Empty | ATP-dependent 6-phosphofructokinase, platelet type OS=Homo sapiens GN=PFKP PE=1 SV=2    | PFKAP_HUMAN | ?      | TRUE | .175380355  | 1.7         | 24.314  | 6.259  | 8.71    | 23.847  | 22.025  | 21.615  |
| 259 | TRUE | Empty | ATP-dependent RNA helicase A OS=Homo sapiens GN=DHX9 PE=1 SV=4                          | DHX9_HUMAN  | ?      | TRUE | .015840947  | 2.326152578 | 24.314  | 7.22   | 14.962  | 38.751  | 33.885  | 35.712  |
| 260 | TRUE | Empty | ATP-dependent RNA helicase DDX1 OS=Homo sapiens GN=DDX1 PE=1 SV=2                       | DDX1_HUMAN  | ?      |      | 0.205597599 | 1.5         | 8.13    | 14.604 | 13.964  | 11.923  | 26.261  | 19.735  |
| 261 | TRUE | Empty | ATP-dependent RNA helicase DDX18 OS=Homo sapiens GN=DDX18 PE=1 SV=2                     | DDX18_HUMAN | 75 kDa | TRUE | .891581636  | 1.1         | 4.06    | 0      | 0       | 1.04    | 1.43    | 1.96    |
| 262 | TRUE | Empty | ATP-dependent RNA helicase DDX19A OS=Homo sapiens GN=DDX19A PE=1 SV=1                   | DD19A_HUMAN | ?      | TRUE | .005538615  | 3.285655565 | 0.99746 | 0      | 0       | 1.04    | 0.84713 | 0.93978 |
| 263 | TRUE | Empty | ATP-dependent RNA helicase DDX39A OS=Homo sapiens GN=DDX39A PE=1 SV=2                   | DX39A_HUMAN | ?      | TRUE | .000546845  | 2.05379188  | 8.13    | 8.54   | 8.71    | 16.395  | 19.484  | 17.856  |
| 264 | TRUE | Empty | ATP-dependent RNA helicase DDX3X OS=Homo sapiens GN=DDX3X PE=1 SV=3                     | DDX3X_HUMAN | ?      | TRUE | .281507001  | 1.3         | 33.155  | 16.691 | 19.949  | 29.809  | 29.65   | 29.133  |
| 265 | TRUE | Empty | ATP-dependent RNA helicase DDX42 OS=Homo sapiens GN=DDX42 PE=1 SV=1                     | DDX42_HUMAN | ?      | TRUE | .035155885  | 4.555065417 | 0       | 0      | 1.49    | 3.61    | 2.14    | 2.94    |
| 266 | TRUE | Empty | BAG family molecular chaperone regulator 3 OS=Homo sapiens GN=BAG3 PE=1 SV=3            | BAG3_HUMAN  | 62 kDa |      | 0.872365376 | 0.9         | 0       | 9.86   | 3.98    | 3.61    | 2.14    | 5.87    |

|     |      |       |                                                                                                                        |             |         |      |             |             |        |         |         |         |         |         |
|-----|------|-------|------------------------------------------------------------------------------------------------------------------------|-------------|---------|------|-------------|-------------|--------|---------|---------|---------|---------|---------|
| 267 | TRUE | Empty | Band 3 anion transport protein OS=Homo sapiens GN=SLC4A1 PE=1 SV=3                                                     | B3AT_HUMAN  | ?       |      | 0.373900966 | 0           | 0      | 0       | 2.24    | 0       | 0       | 0       |
| 268 | TRUE | Empty | Band 4.1-like protein 4B OS=Homo sapiens GN=EPB41L4B PE=2 SV=2                                                         | E41LB_HUMAN | ?       | TRUE | .217218164  | INF         | 0      | 0       | 0       | 0       | 0.84713 | 2.94    |
| 269 | TRUE | Empty | Barrier-to-autointegration factor OS=Homo sapiens GN=BANF1 PE=1 SV=1                                                   | BAF_HUMAN   | 10 kDa  |      | 0.337061464 | 0.8         | 8.13   | 18.777  | 13.964  | 8.74    | 11.013  | 12.217  |
| 270 | TRUE | Empty | Basic leucine zipper and W2 domain-containing protein 1 OS=Homo sapiens GN=BZW1 PE=1 SV=1                              | BZW1_HUMAN  | ?       | TRUE | .094658247  | 5.5         | 2.03   | 0       | 0       | 1.04    | 5.99    | 4.89    |
| 271 | TRUE | Empty | Basic leucine zipper and W2 domain-containing protein 2 OS=Homo sapiens GN=BZW2 PE=1 SV=1                              | BZW2_HUMAN  | ?       | TRUE | .169754044  | INF         | 0      | 0       | 0       | 0       | 1.43    | 3.91    |
| 272 | TRUE | Empty | B-cell CLL/lymphoma 9-like protein OS=Homo sapiens GN=BCL9L PE=1 SV=1                                                  | BCL9L_HUMAN | ?       |      | 0.184606477 | INF         | 0      | 0       | 0       | 0.74522 | 0       | 1.96    |
| 273 | TRUE | Empty | B-cell receptor-associated protein 31 OS=Homo sapiens GN=BCAP31 PE=1 SV=3                                              | BAP31_HUMAN | ?       |      | 0.613977735 | 0.4         | 28.734 | 0       | 0       | 6.707   | 3.85    | 2.94    |
| 274 | TRUE | Empty | Bcl-2-associated transcription factor 1 OS=Homo sapiens GN=BCLAF1 PE=1 SV=2                                            | BCLF1_HUMAN | ?       | TRUE | 0.30647747  | 0.1         | 0      | 1.0432  | 3.98    | 0.74522 | 0       | 0       |
| 275 | TRUE | Empty | Beta-actin-like protein 2 OS=Homo sapiens GN=ACTBL2 PE=1 SV=2                                                          | ACTBL_HUMAN | 42 kDa  | TRUE | .144748861  | 0.7         | 81.782 | 53.202  | 82.789  | 44.713  | 60.994  | 53.568  |
| 276 | TRUE | Empty | Beta-arrestin-1 OS=Homo sapiens GN=ARRB1 PE=1 SV=2                                                                     | ARRB1_HUMAN | ?       | TRUE | .053421057  | INF         | 0      | 0       | 0       | 2.57    | 0.84713 | 3.91    |
| 277 | TRUE | Empty | Beta-galactosidase OS=Homo sapiens GN=GLB1 PE=1 SV=2                                                                   | BGAL_HUMAN  | ?       | TRUE | .195474009  | 2.1         | 0      | 1.0432  | 0.99746 | 0.74522 | 1.43    | 1.96    |
| 278 | TRUE | Empty | Beta-hexosaminidase subunit alpha OS=Homo sapiens GN=HEXA PE=1 SV=2                                                    | HEXA_HUMAN  | ?       | TRUE | .920175008  | 0.9         | 0      | 6.259   | 4.73    | 5.65    | 2.14    | 2.94    |
| 279 | TRUE | Empty | Beta-hexosaminidase subunit beta OS=Homo sapiens GN=HEXB PE=1 SV=3                                                     | HEXB_HUMAN  | 63 kDa  |      | 0.052661927 | 0.3         | 2.03   | 1.0432  | 1.49    | 0.74522 | 0.84713 | 0       |
| 280 | TRUE | Empty | Beta-lactamase-like protein 2 OS=Homo sapiens GN=LACTB2 PE=1 SV=2                                                      | LACB2_HUMAN | 33 kDa  |      | 0.473019919 | 3.8         | 0      | 0       | 2.24    | 10.433  | 0.84713 | 0       |
| 281 | TRUE | Empty | BH3-interacting domain death agonist OS=Homo sapiens GN=BID PE=1 SV=1                                                  | BID_HUMAN   | ?       |      | 0.401696177 | 0.6         | 11.052 | 14.604  | 1.49    | 6.707   | 1.43    | 7.83    |
| 282 | TRUE | Empty | Bifunctional 3'-phosphoadenosine 5'-phosphosulfate synthase 1 OS=Homo sapiens GN=PAPSS1 PE=1 SV=2                      | PAPS1_HUMAN | 71 kDa  | TRUE | .074620032  | 2.6         | 2.03   | 0       | 1.49    | 3.61    | 2.14    | 4.89    |
| 283 | TRUE | Empty | Bifunctional 3'-phosphoadenosine 5'-phosphosulfate synthase 2 OS=Homo sapiens GN=PAPSS2 PE=1 SV=2                      | PAPS2_HUMAN | ?       | TRUE | .045552312  | 2.427306816 | 2.03   | 6.259   | 10.972  | 12.669  | 19.484  | 15.037  |
| 284 | TRUE | Empty | Bifunctional coenzyme A synthase OS=Homo sapiens GN=COASY PE=1 SV=4                                                    | COASY_HUMAN | ?       |      | 0.03308882  | 3.48079121  | 0      | 0.99746 | 0       | 0.74522 | 0.84713 | 1.96    |
| 285 | TRUE | Empty | Bifunctional glutamate/proline--tRNA ligase OS=Homo sapiens GN=EPRS PE=1 SV=5                                          | SYEP_HUMAN  | 171 kDa | TRUE | .000762161  | 28.37417039 | 0      | 0.99746 | 0       | 10.433  | 8.13    | 9.78    |
| 286 | TRUE | Empty | Bifunctional methylenetetrahydrofolate dehydrogenase/cyclohydrolase, mitochondrial OS=Homo sapiens GN=MTHFD2 PE=1 SV=2 | MTDC_HUMAN  | ?       | TRUE | .117744445  | INF         | 0      | 0       | 0       | 1.04    | 1.43    | 0       |
| 287 | TRUE | Empty | Bifunctional purine biosynthesis protein PURH OS=Homo sapiens GN=ATIC PE=1 SV=3                                        | PUR9_HUMAN  | ?       | TRUE | .252948543  | 1.3         | 46.417 | 26.079  | 35.908  | 41.732  | 41.51   | 53.568  |
| 288 | TRUE | Empty | Biliverdin reductase A OS=Homo sapiens GN=BLVRA PE=1 SV=2                                                              | BIEA_HUMAN  | 33 kDa  | TRUE | .005206173  | 4.654333844 | 0      | 4.1727  | 3.98    | 10.433  | 14.401  | 13.157  |
| 289 | TRUE | Empty | BolA-like protein 2 OS=Homo sapiens GN=BOLA2 PE=1 SV=1                                                                 | BOLA2_HUMAN | ?       |      | 0.780084979 | 0.8         | 0      | 5.59    | 2.24    | 1.04    | 3.85    | 1.96    |
| 290 | TRUE | Empty | Brain acid soluble protein 1 OS=Homo sapiens GN=BASP1 PE=1 SV=2                                                        | BASP1_HUMAN | ?       |      | 0.17460843  | 0           | 2.03   | 1.0432  | 8.71    | 0       | 0       | 0       |
| 291 | TRUE | Empty | Branched-chain-amino-acid aminotransferase, mitochondrial OS=Homo sapiens GN=BCAT2 PE=1 SV=2                           | BCAT2_HUMAN | ?       |      | 0.331587669 | 0.4         | 0      | 7.22    | 6.22    | 0.74522 | 2.14    | 2.94    |
| 292 | TRUE | Empty | BRCA1-A complex subunit BRE OS=Homo sapiens GN=BRE PE=1 SV=2                                                           | BRE_HUMAN   | ?       |      | 0.513864492 | 2.1         | 0      | 1.0432  | 0.99746 | 0       | 3.85    | 0.93978 |
| 293 | TRUE | Empty | BRCA1-associated ATM activator 1 OS=Homo sapiens GN=BRAT1 PE=1 SV=2                                                    | BRAT1_HUMAN | ?       |      | 0.063218814 | INF         | 0      | 0       | 0       | 2.09    | 0.84713 | 4.89    |

|     |      |       |                                                                                                     |             |         |      |             |             |         |         |         |         |         |         |
|-----|------|-------|-----------------------------------------------------------------------------------------------------|-------------|---------|------|-------------|-------------|---------|---------|---------|---------|---------|---------|
| 294 | TRUE | Empty | BRCA1-associated protein OS=Homo sapiens GN=BRAP PE=1 SV=2                                          | BRAP_HUMAN  | ?       |      | 0.005538615 | 3.285655565 | 0.99746 | 0       | 0       | 1.04    | 0.84713 | 0.93978 |
| 295 | TRUE | Empty | Breast carcinoma-amplified sequence 1 OS=Homo sapiens GN=BCAS1 PE=1 SV=2                            | BCAS1_HUMAN | ?       | TRUE | .394250017  | 0.5         | 0       | 7.22    | 4.73    | 2.57    | 0.84713 | 2.94    |
| 296 | TRUE | Empty | BRO1 domain-containing protein BROX OS=Homo sapiens GN=BROX PE=1 SV=1                               | BROX_HUMAN  | ?       |      | 0.053421057 | INF         | 0       | 0       | 0       | 2.57    | 0.84713 | 3.91    |
| 297 | TRUE | Empty | C-1-tetrahydrofolate synthase, cytoplasmic OS=Homo sapiens GN=MTHFD1 PE=1 SV=3                      | C1TC_HUMAN  | 102 kDa |      | 0.041818893 | 2.22074096  | 35.365  | 10.432  | 14.962  | 41.732  | 41.51   | 51.688  |
| 298 | TRUE | Empty | Cactin OS=Homo sapiens GN=CACTIN PE=1 SV=3                                                          | CATIN_HUMAN | ?       |      | 0.351869907 | 1.7         | 0       | 4.1727  | 3.98    | 6.707   | 4.57    | 2.94    |
| 299 | TRUE | Empty | CAD protein OS=Homo sapiens GN=CAD PE=1 SV=3                                                        | PYR1_HUMAN  | 243 kDa | TRUE | .002719629  | 21.71936719 | 0.99746 | 0       | 0       | 6.707   | 9.85    | 5.87    |
| 300 | TRUE | Empty | Cadherin EGF LAG seven-pass G-type receptor 2 OS=Homo sapiens GN=CELSR2 PE=1 SV=1                   | CELR2_HUMAN | 317 kDa | TRUE | .163163057  | 0           | 0       | 6.259   | 2.24    | 0       | 0       | 0       |
| 301 | TRUE | Empty | Cadherin-1 OS=Homo sapiens GN=CDH1 PE=1 SV=3                                                        | CADH1_HUMAN | ?       | TRUE | .509929123  | 1.8         | 2.03    | 1.0432  | 0       | 2.57    | 0       | 3.91    |
| 302 | TRUE | Empty | Calcium-binding mitochondrial carrier protein Aralar2 OS=Homo sapiens GN=SLC25A13 PE=1 SV=2         | CMC2_HUMAN  | ?       | TRUE | 0.01245054  | 4.882180739 | 0       | 0.99746 | 0       | 2.57    | 1.43    | 0.93978 |
| 303 | TRUE | Empty | Calcium-binding mitochondrial carrier protein ScaMC-1 OS=Homo sapiens GN=SLC25A24 PE=1 SV=2         | SCMC1_HUMAN | ?       |      | 0.18202165  | 4           | 17.683  | 0       | 0       | 41.732  | 17.79   | 11.277  |
| 304 | TRUE | Empty | Calcium-binding protein 39 OS=Homo sapiens GN=CAB39 PE=1 SV=1                                       | CAB39_HUMAN | 40 kDa  | TRUE | .082815077  | 2.7         | 0       | 1.0432  | 2.24    | 2.09    | 3.85    | 4.89    |
| 305 | TRUE | Empty | Calcyclin-binding protein OS=Homo sapiens GN=CACYBP PE=1 SV=2                                       | CYBP_HUMAN  | ?       |      | 0.79476342  | 0.8         | 0       | 34.425  | 12.967  | 14.904  | 11.86   | 12.217  |
| 306 | TRUE | Empty | Calcyphosin OS=Homo sapiens GN=CAPS PE=1 SV=1                                                       | CAYP1_HUMAN | ?       |      | 0.277766028 | 3.6         | 0       | 0       | 0.99746 | 0       | 1.43    | 1.96    |
| 307 | TRUE | Empty | Calmodulin OS=Homo sapiens GN=CALM1 PE=1 SV=2                                                       | CALM_HUMAN  | 17 kDa  | TRUE | 0.62499055  | 0.8         | 6.631   | 9.86    | 4.73    | 2.09    | 3.85    | 10.338  |
| 308 | TRUE | Empty | Calmodulin-like protein 5 OS=Homo sapiens GN=CALML5 PE=1 SV=2                                       | CALL5_HUMAN | 16 kDa  |      | 0.122021578 | 0.3         | 6.631   | 22.95   | 29.924  | 3.61    | 9.85    | 4.89    |
| 309 | TRUE | Empty | Calnexin OS=Homo sapiens GN=CANX PE=1 SV=2                                                          | CALX_HUMAN  | ?       |      | 0.066967129 | 3.5         | 11.052  | 1.0432  | 0.99746 | 20.866  | 12.707  | 12.217  |
| 310 | TRUE | Empty | Calpain small subunit 1 OS=Homo sapiens GN=CAPNS1 PE=1 SV=1                                         | CPNS1_HUMAN | 28 kDa  | TRUE | .887886748  | 0.9         | 0       | 6.259   | 8.71    | 5.65    | 5.99    | 2.94    |
| 311 | TRUE | Empty | Calpain-1 catalytic subunit OS=Homo sapiens GN=CAPN1 PE=1 SV=1                                      | CAN1_HUMAN  | 82 kDa  | TRUE | .006927817  | 11.29068462 | 0       | 2.0863  | 2.24    | 12.669  | 21.178  | 23.495  |
| 312 | TRUE | Empty | Calpain-2 catalytic subunit OS=Homo sapiens GN=CAPN2 PE=1 SV=6                                      | CAN2_HUMAN  | ?       | TRUE | 0.06853503  | INF         | 0       | 0       | 0       | 0.74522 | 2.14    | 0.93978 |
| 313 | TRUE | Empty | Calpastatin OS=Homo sapiens GN=CAST PE=1 SV=4                                                       | ICAL_HUMAN  | ?       | TRUE | .882916777  | 1.1         | 0       | 14.604  | 11.969  | 8.26    | 7.42    | 12.217  |
| 314 | TRUE | Empty | Calponin-2 OS=Homo sapiens GN=CNN2 PE=1 SV=4                                                        | CNN2_HUMAN  | ?       | TRUE | .118703811  | 9.5         | 0       | 0       | 0.99746 | 2.09    | 0.84713 | 5.87    |
| 315 | TRUE | Empty | Calreticulin OS=Homo sapiens GN=CALR PE=1 SV=1                                                      | CALR_HUMAN  | 48 kDa  |      | 0.292671775 | 2           | 22.103  | 6.259   | 1.49    | 26.083  | 9.85    | 24.434  |
| 316 | TRUE | Empty | cAMP-dependent protein kinase catalytic subunit alpha OS=Homo sapiens GN=PRKACA PE=1 SV=2           | KAPCA_HUMAN | ?       | TRUE | .191631292  | 3.1         | 4.06    | 0       | 0       | 2.57    | 6.71    | 4.89    |
| 317 | TRUE | Empty | cAMP-dependent protein kinase type II-alpha regulatory subunit OS=Homo sapiens GN=PRKAR2A PE=1 SV=2 | KAP2_HUMAN  | ?       | TRUE | .017814887  | 5.731437852 | 0.99746 | 0       | 0       | 2.57    | 2.14    | 0.93978 |
| 318 | TRUE | Empty | Cancer-related nucleoside-triphosphatase OS=Homo sapiens GN=NTPCR PE=1 SV=1                         | NTPCR_HUMAN | 21 kDa  |      | 0.374455941 | 1.7         | 0       | 1.0432  | 0.99746 | 0.74522 | 1.43    | 0.93978 |
| 319 | TRUE | Empty | CAP-Gly domain-containing linker protein 1 OS=Homo sapiens GN=CLIP1 PE=1 SV=2                       | CLIP1_HUMAN | ?       | TRUE | 0.76413443  | 0.8         | 0       | 2.0863  | 1.49    | 2.57    | 0       | 0.93978 |
| 320 | TRUE | Empty | Caprin-1 OS=Homo sapiens GN=CAPRIN1 PE=1 SV=2                                                       | CAPR1_HUMAN | ?       |      | 0.873156475 | 0.9         | 0       | 9.86    | 8.71    | 3.61    | 3.85    | 9.78    |
| 321 | TRUE | Empty | Carbonic anhydrase 2 OS=Homo sapiens GN=CA2 PE=1 SV=2                                               | CAH2_HUMAN  | 29 kDa  |      | 0.146372392 | 0.5         | 15.472  | 37.554  | 21.944  | 10.433  | 14.401  | 14.097  |
| 322 | TRUE | Empty | Carbonyl reductase [NADPH] 1 OS=Homo sapiens GN=CBR1 PE=1 SV=3                                      | CBR1_HUMAN  | ?       | TRUE | 0.84630378  | 1.1         | 6.631   | 11.475  | 14.962  | 8.74    | 13.554  | 13.157  |
| 323 | TRUE | Empty | Carboxymethylenebutenolidase homolog OS=Homo sapiens GN=CMBL PE=1 SV=1                              | CMBL_HUMAN  | 28 kDa  |      | 0.784057816 | 0.7         | 0       | 0       | 3.98    | 0       | 0.84713 | 1.96    |
| 324 | TRUE | Empty | Carcinoembryonic antigen-related cell adhesion molecule 5 OS=Homo sapiens GN=CEACAM5 PE=1 SV=3      | CEAM5_HUMAN | ?       | TRUE | .323128365  | 3.5         | 0       | 2.0863  | 0       | 0       | 2.14    | 4.89    |

|     |      |       |                                                                                           |             |        |      |             |             |         |         |         |         |         |         |
|-----|------|-------|-------------------------------------------------------------------------------------------|-------------|--------|------|-------------|-------------|---------|---------|---------|---------|---------|---------|
| 325 | TRUE | Empty | Carnitine O-palmitoyltransferase 1, liver isoform OS=Homo sapiens GN=CPT1A PE=1 SV=2      | CPT1A_HUMAN | ?      |      | 0.279257698 | INF         | 0       | 0       | 0       | 5.65    | 0.84713 | 0       |
| 326 | TRUE | Empty | Casein kinase I isoform alpha OS=Homo sapiens GN=CSNK1A1 PE=1 SV=2                        | KC1A_HUMAN  | ?      | TRUE | .122761597  | 3.9         | 2.03    | 0       | 0       | 1.04    | 4.57    | 2.94    |
| 327 | TRUE | Empty | Casein kinase II subunit alpha OS=Homo sapiens GN=CSNK2A1 PE=1 SV=1                       | CSK21_HUMAN | ?      | TRUE | .106968772  | 5.3         | 0       | 0       | 0.99746 | 0.74522 | 1.43    | 2.94    |
| 328 | TRUE | Empty | Casein kinase II subunit beta OS=Homo sapiens GN=CSNK2B PE=1 SV=1                         | CSK2B_HUMAN | 25 kDa |      | 0.194668816 | 2.6         | 0       | 2.0863  | 0.99746 | 3.61    | 3.85    | 0.93978 |
| 329 | TRUE | Empty | Catalase OS=Homo sapiens GN=CAT PE=1 SV=3                                                 | CATA_HUMAN  | 60 kDa |      | 0.093238996 | 4.2         | 0       | 3.1295  | 1.49    | 11.923  | 5.0828  | 4.89    |
| 330 | TRUE | Empty | Catechol O-methyltransferase OS=Homo sapiens GN=COMT PE=1 SV=2                            | COMT_HUMAN  | ?      |      | 0.090276431 | 2.4         | 4.06    | 3.1295  | 2.24    | 12.669  | 5.99    | 6.85    |
| 331 | TRUE | Empty | Catenin alpha-1 OS=Homo sapiens GN=CTNNA1 PE=1 SV=1                                       | CTNA1_HUMAN | ?      | TRUE | .200546071  | 1.6         | 8.13    | 6.259   | 14.962  | 19.376  | 17.79   | 10.338  |
| 332 | TRUE | Empty | Catenin beta-1 OS=Homo sapiens GN=CTNNB1 PE=1 SV=1                                        | CTNB1_HUMAN | ?      | TRUE | .443363156  | 1.9         | 0       | 0       | 4.73    | 2.57    | 3.85    | 3.91    |
| 333 | TRUE | Empty | Catenin delta-1 OS=Homo sapiens GN=CTNND1 PE=1 SV=1                                       | CTND1_HUMAN | ?      |      | 0.004127847 | 13.19389443 | 0       | 0       | 1.49    | 11.178  | 7.42    | 7.83    |
| 334 | TRUE | Empty | Cathepsin B OS=Homo sapiens GN=CTSB PE=1 SV=3                                             | CATB_HUMAN  | 38 kDa |      | 0.088962811 | 0.4         | 4.06    | 11.475  | 7.97    | 2.09    | 3.85    | 3.91    |
| 335 | TRUE | Empty | Cathepsin D OS=Homo sapiens GN=CTSD PE=1 SV=1                                             | CATD_HUMAN  | 45 kDa |      | 0.090938872 | 0.7         | 50.837  | 49.029  | 33.914  | 24.592  | 35.58   | 31.953  |
| 336 | TRUE | Empty | Cathepsin L1 OS=Homo sapiens GN=CTSL PE=1 SV=2                                            | CATL1_HUMAN | 38 kDa | TRUE | 0.77737516  | 1.3         | 0       | 2.0863  | 1.49    | 1.04    | 0       | 3.91    |
| 337 | TRUE | Empty | CCR4-NOT transcription complex subunit 1 OS=Homo sapiens GN=CNOT1 PE=1 SV=2               | CNOT1_HUMAN | ?      | TRUE | .011775165  | 14.49371403 | 0       | 0.99746 | 0       | 2.09    | 6.71    | 4.89    |
| 338 | TRUE | Empty | CD166 antigen OS=Homo sapiens GN=ALCAM PE=1 SV=2                                          | CD166_HUMAN | ?      |      | 0.373900966 | INF         | 0       | 0       | 0       | 2.57    | 0       | 0       |
| 339 | TRUE | Empty | CD2 antigen cytoplasmic tail-binding protein 2 OS=Homo sapiens GN=CD2BP2 PE=1 SV=1        | CD2B2_HUMAN | 38 kDa |      | 0.675387566 | 1.4         | 2.03    | 1.0432  | 5.47    | 8.74    | 2.14    | 1.96    |
| 340 | TRUE | Empty | CD2-associated protein OS=Homo sapiens GN=CD2AP PE=1 SV=1                                 | CD2AP_HUMAN | 71 kDa |      | 0.736671358 | 0.8         | 0       | 3.1295  | 1.49    | 2.57    | 0.84713 | 0.93978 |
| 341 | TRUE | Empty | CD44 antigen OS=Homo sapiens GN=CD44 PE=1 SV=3                                            | CD44_HUMAN  | ?      |      | 0.01245054  | 4.882180739 | 0       | 0       | 0.99746 | 2.57    | 1.43    | 0.93978 |
| 342 | TRUE | Empty | CD59 glycoprotein OS=Homo sapiens GN=CD59 PE=1 SV=1                                       | CD59_HUMAN  | 14 kDa |      | 0.003020465 | 5.926453191 | 0       | 0       | 0.99746 | 1.04    | 2.14    | 1.96    |
| 343 | TRUE | Empty | CD81 antigen OS=Homo sapiens GN=CD81 PE=1 SV=1                                            | CD81_HUMAN  | 26 kDa |      | 0.944043977 | 0.9         | 0       | 8.54    | 1.49    | 3.61    | 5.99    | 0       |
| 344 | TRUE | Empty | CD9 antigen OS=Homo sapiens GN=CD9 PE=1 SV=4                                              | CD9_HUMAN   | 25 kDa |      | 0.483022542 | 0.5         | 0       | 4.1727  | 12.967  | 3.61    | 3.85    | 0.93978 |
| 345 | TRUE | Empty | CDGSH iron-sulfur domain-containing protein 2 OS=Homo sapiens GN=CISD2 PE=1 SV=1          | CISD2_HUMAN | 15 kDa |      | 0.064414469 | INF         | 0       | 0       | 0       | 1.04    | 1.43    | 4.89    |
| 346 | TRUE | Empty | CDP-diacylglycerol--inositol 3-phosphatidyltransferase OS=Homo sapiens GN=CDIPT PE=1 SV=1 | CDIPT_HUMAN | ?      |      | 0.173372942 | 5.9         | 2.03    | 0       | 0       | 2.09    | 1.43    | 8.81    |
| 347 | TRUE | Empty | Cell cycle and apoptosis regulator protein 2 OS=Homo sapiens GN=CCAR2 PE=1 SV=2           | CCAR2_HUMAN | ?      |      | 0.027346516 | 27.95657592 | 0       | 1.0432  | 0       | 8.74    | 5.99    | 15.037  |
| 348 | TRUE | Empty | Cell division control protein 42 homolog OS=Homo sapiens GN=CDC42 PE=1 SV=2               | CDC42_HUMAN | ?      | TRUE | .002245391  | 19.82565717 | 0.99746 | 0       | 0       | 7.22    | 7.42    | 4.89    |
| 349 | TRUE | Empty | Cellular nucleic acid-binding protein OS=Homo sapiens GN=CNBP PE=1 SV=1                   | CNBP_HUMAN  | ?      |      | 0.349068061 | 0.4         | 0       | 12.518  | 18.952  | 5.65    | 6.71    | 0.93978 |
| 350 | TRUE | Empty | Cellular retinoic acid-binding protein 2 OS=Homo sapiens GN=CRABP2 PE=1 SV=2              | RABP2_HUMAN | 16 kDa | TRUE | .371969959  | 1.8         | 11.052  | 10.432  | 14.962  | 6.707   | 19.484  | 37.591  |
| 351 | TRUE | Empty | Centrin-2 OS=Homo sapiens GN=CETN2 PE=1 SV=1                                              | CETN2_HUMAN | 20 kDa | TRUE | .416420095  | 0.4         | 0       | 4.1727  | 1.49    | 0       | 1.43    | 0.93978 |
| 352 | TRUE | Empty | Ceramide synthase 2 OS=Homo sapiens GN=CERS2 PE=1 SV=1                                    | CERS2_HUMAN | 45 kDa |      | 0.226345874 | INF         | 0       | 0       | 0       | 0       | 3.85    | 0.93978 |
| 353 | TRUE | Empty | Cingulin OS=Homo sapiens GN=CGN PE=1 SV=2                                                 | CING_HUMAN  | ?      | TRUE | .577751678  | 0.7         | 0       | 5.59    | 7.97    | 2.57    | 1.43    | 4.89    |
| 354 | TRUE | Empty | Citrate synthase, mitochondrial OS=Homo sapiens GN=CS PE=1 SV=2                           | CISY_HUMAN  | 52 kDa |      | 0.019646104 | 21.74352856 | 0       | 0       | 0.99746 | 3.61    | 7.42    | 10.338  |
| 355 | TRUE | Empty | C-Jun-amino-terminal kinase-interacting protein 4 OS=Homo sapiens GN=SPAG9 PE=1 SV=4      | JIP4_HUMAN  | ?      | TRUE | .179911888  | 2.9         | 0       | 3.1295  | 0.99746 | 6.707   | 2.14    | 2.94    |
| 356 | TRUE | Empty | Clathrin heavy chain 1 OS=Homo sapiens GN=CLTC PE=1 SV=5                                  | CLH1_HUMAN  | ?      | TRUE | .074816381  | 2.3         | 125.99  | 32.338  | 22.942  | 126.69  | 149.94  | 146.61  |
| 357 | TRUE | Empty | Clathrin interactor 1 OS=Homo sapiens GN=CLINT1 PE=1 SV=1                                 | EPN4_HUMAN  | ?      |      | 0.921029287 | 0.9         | 0       | 4.1727  | 3.98    | 2.57    | 1.43    | 3.91    |

|     |      |       |                                                                                                         |             |         |      |             |             |         |         |         |         |         |         |
|-----|------|-------|---------------------------------------------------------------------------------------------------------|-------------|---------|------|-------------|-------------|---------|---------|---------|---------|---------|---------|
| 358 | TRUE | Empty | Clathrin light chain B OS=Homo sapiens GN=CLTB PE=1 SV=1                                                | CLCB_HUMAN  | ?       | TRUE | 0.37963503  | 0.2         | 0       | 1.0432  | 8.71    | 0.74522 | 0.84713 | 0       |
| 359 | TRUE | Empty | OS=Homo sapiens GN=CPSF1 PE=1 SV=2                                                                      | CPSF1_HUMAN | 161 kDa | TRUE | .373900966  | INF         | 0       | 0       | 0       | 1.04    | 0       | 0       |
| 360 | TRUE | Empty | Cleavage and polyadenylation specificity factor subunit 3 OS=Homo sapiens GN=CPSF3 PE=1 SV=1            | CPSF3_HUMAN | 77 kDa  | TRUE | .147672906  | INF         | 0       | 0       | 0       | 0       | 1.43    | 0.93978 |
| 361 | TRUE | Empty | Cleavage and polyadenylation specificity factor subunit 5 OS=Homo sapiens GN=NUDT21 PE=1 SV=1           | CPSF5_HUMAN | 26 kDa  |      | 0.582536923 | 1.2         | 6.631   | 6.259   | 7.97    | 9.78    | 11.86   | 3.91    |
| 362 | TRUE | Empty | Cleavage and polyadenylation specificity factor subunit 6 OS=Homo sapiens GN=CPSF6 PE=1 SV=2            | CPSF6_HUMAN | ?       |      | 0.963334705 | 1           | 0       | 5.59    | 8.71    | 6.707   | 5.0828  | 2.94    |
| 363 | TRUE | Empty | Cleavage and polyadenylation specificity factor subunit 7 OS=Homo sapiens GN=CPSF7 PE=1 SV=1            | CPSF7_HUMAN | ?       | TRUE | .482026799  | 1.5         | 0       | 4.1727  | 1.49    | 3.61    | 2.14    | 2.94    |
| 364 | TRUE | Empty | Cleavage stimulation factor subunit 2 tau variant OS=Homo sapiens GN=CSTF2T PE=1 SV=1                   | CSTFT_HUMAN | 64 kDa  | TRUE | .067797762  | 2.7         | 0       | 2.0863  | 1.49    | 3.61    | 2.14    | 4.89    |
| 365 | TRUE | Empty | Clustered mitochondria protein homolog OS=Homo sapiens GN=CLUH PE=1 SV=2                                | CLU_HUMAN   | 147 kDa |      | 0.140218517 | INF         | 0       | 0       | 0       | 0       | 1.43    | 2.94    |
| 366 | TRUE | Empty | C-Myc-binding protein OS=Homo sapiens GN=MYCBP PE=1 SV=3                                                | MYCBP_HUMAN | 12 kDa  |      | 0.607859167 | 0.6         | 0       | 4.1727  | 6.22    | 5.65    | 1.43    | 0       |
| 367 | TRUE | Empty | Coagulation factor V OS=Homo sapiens GN=F5 PE=1 SV=4                                                    | FA5_HUMAN   | 252 kDa |      | 0.069585698 | 3.2         | 0       | 1.0432  | 4.73    | 5.17    | 5.0828  | 8.81    |
| 368 | TRUE | Empty | Coatomer subunit alpha OS=Homo sapiens GN=COPA PE=1 SV=2                                                | COPA_HUMAN  | ?       | TRUE | 0.00621089  | 6.024621177 | 8.13    | 0       | 1.49    | 17.885  | 22.025  | 25.374  |
| 369 | TRUE | Empty | Coatomer subunit beta OS=Homo sapiens GN=COPB1 PE=1 SV=3                                                | COPB_HUMAN  | 107 kDa | TRUE | .000193602  | 12.40187333 | 0       | 1.0432  | 2.24    | 17.885  | 15.248  | 16.916  |
| 370 | TRUE | Empty | Coatomer subunit beta' OS=Homo sapiens GN=COPB2 PE=1 SV=2                                               | COPB2_HUMAN | ?       |      | 0.015200776 | 3.359556622 | 11.052  | 2.0863  | 2.24    | 17.885  | 20.331  | 15.976  |
| 371 | TRUE | Empty | Coatomer subunit delta OS=Homo sapiens GN=ARCN1 PE=1 SV=1                                               | COPD_HUMAN  | ?       | TRUE | .017502731  | 2.854724882 | 4.06    | 2.0863  | 1.49    | 8.26    | 5.99    | 9.78    |
| 372 | TRUE | Empty | Coatomer subunit epsilon OS=Homo sapiens GN=COPE PE=1 SV=3                                              | COPE_HUMAN  | ?       |      | 0.004776955 | 9.305034788 | 0       | 0       | 0.99746 | 2.09    | 2.14    | 3.91    |
| 373 | TRUE | Empty | Coatomer subunit gamma-1 OS=Homo sapiens GN=COPG1 PE=1 SV=1                                             | COPG1_HUMAN | 98 kDa  | TRUE | .000914255  | 5.266562445 | 4.06    | 3.1295  | 4.73    | 18.63   | 22.025  | 25.374  |
| 374 | TRUE | Empty | Coatomer subunit gamma-2 OS=Homo sapiens GN=COPG2 PE=1 SV=1                                             | COPG2_HUMAN | ?       | TRUE | .079931037  | 3.9         | 4.06    | 3.1295  | 2.24    | 6.707   | 12.707  | 21.615  |
| 375 | TRUE | Empty | Cofilin-1 OS=Homo sapiens GN=CFL1 PE=1 SV=3                                                             | COF1_HUMAN  | 19 kDa  | TRUE | .738797939  | 0.9         | 70.73   | 150.22  | 122.69  | 93.152  | 105.89  | 118.41  |
| 376 | TRUE | Empty | Coiled-coil and C2 domain-containing protein 1A OS=Homo sapiens GN=CC2D1A PE=1 SV=1                     | C2D1A_HUMAN | ?       | TRUE | .026917445  | 2.358667219 | 2.03    | 1.0432  | 0.99746 | 3.61    | 2.14    | 3.91    |
| 377 | TRUE | Empty | Coiled-coil domain-containing protein 25 OS=Homo sapiens GN=CCDC25 PE=1 SV=2                            | CCD25_HUMAN | ?       |      | 0.189953018 | INF         | 0       | 0       | 0       | 2.57    | 0.84713 | 0       |
| 378 | TRUE | Empty | Coiled-coil domain-containing protein 47 OS=Homo sapiens GN=CCDC47 PE=1 SV=1                            | CCD47_HUMAN | ?       | TRUE | .013972038  | 17.49132797 | 0.99746 | 0       | 0       | 5.65    | 8.13    | 3.91    |
| 379 | TRUE | Empty | Cold shock domain-containing protein E1 OS=Homo sapiens GN=CSDE1 PE=1 SV=2                              | CSDE1_HUMAN | ?       | TRUE | .105071446  | 2.5         | 0       | 3.1295  | 6.22    | 7.22    | 6.71    | 11.277  |
| 380 | TRUE | Empty | Cold-inducible RNA-binding protein OS=Homo sapiens GN=CIRBP PE=1 SV=1                                   | CIRBP_HUMAN | ?       | TRUE | .080788661  | 0.5         | 6.631   | 6.259   | 8.71    | 0.74522 | 5.0828  | 4.89    |
| 381 | TRUE | Empty | Complement C3 OS=Homo sapiens GN=C3 PE=1 SV=2                                                           | CO3_HUMAN   | 187 kDa | TRUE | .849337677  | 0.7         | 0       | 0       | 1.49    | 1.04    | 0       | 0       |
| 382 | TRUE | Empty | Complement component 1 Q subcomponent-binding protein, mitochondrial OS=Homo sapiens GN=C1QBP PE=1 SV=1 | C1QBP_HUMAN | 31 kDa  |      | 0.133459228 | 1.8         | 6.631   | 2.0863  | 2.24    | 6.707   | 8.13    | 5.87    |
| 383 | TRUE | Empty | Condensin complex subunit 1 OS=Homo sapiens GN=NCAPD2 PE=1 SV=3                                         | CND1_HUMAN  | 157 kDa | TRUE | .043958178  | 13.18519038 | 0       | 0.99746 | 0       | 1.04    | 5.0828  | 6.85    |
| 384 | TRUE | Empty | Conserved oligomeric Golgi complex subunit 2 OS=Homo sapiens GN=COG2 PE=1 SV=1                          | COG2_HUMAN  | ?       |      | 0.373900966 | INF         | 0       | 0       | 0       | 0       | 1.43    | 0       |

|     |      |       |                                                                                                 |             |        |      |             |             |         |         |         |         |         |         |
|-----|------|-------|-------------------------------------------------------------------------------------------------|-------------|--------|------|-------------|-------------|---------|---------|---------|---------|---------|---------|
| 385 | TRUE | Empty | Conserved oligomeric Golgi complex subunit 8 OS=Homo sapiens<br>GN=COG8 PE=1 SV=2               | COG8_HUMAN  | 68 kDa |      | 0.120323626 | INF         | 0       | 0       | 0       | 1.04    | 0.84713 | 4.89    |
| 386 | TRUE | Empty | Constitutive coactivator of PPAR-gamma-like protein 1 OS=Homo sapiens<br>GN=FAM120A PE=1 SV=2   | F120A_HUMAN | ?      | TRUE | .927527477  | 1.1         | 4.06    | 0       | 0.99746 | 2.57    | 1.43    | 1.96    |
| 387 | TRUE | Empty | COP9 signalosome complex subunit 1 OS=Homo sapiens GN=GPS1<br>PE=1 SV=4                         | CSN1_HUMAN  | ?      | TRUE | .117184678  | INF         | 0       | 0       | 0       | 0       | 1.43    | 1.96    |
| 388 | TRUE | Empty | COP9 signalosome complex subunit 4 OS=Homo sapiens<br>GN=COPS4 PE=1 SV=1                        | CSN4_HUMAN  | ?      | TRUE | .016501622  | 9.949972931 | 0.99746 | 0       | 0       | 4.13    | 1.43    | 3.91    |
| 389 | TRUE | Empty | COP9 signalosome complex subunit 6 OS=Homo sapiens<br>GN=COPS6 PE=1 SV=1                        | CSN6_HUMAN  | 36 kDa |      | 0.177767042 | INF         | 0       | 0       | 0       | 2.57    | 0       | 0.93978 |
| 390 | TRUE | Empty | Copine-1 OS=Homo sapiens GN=CPNE1 PE=1 SV=1                                                     | CPNE1_HUMAN | 59 kDa |      | 0.140218517 | INF         | 0       | 0       | 0       | 0       | 1.43    | 2.94    |
| 391 | TRUE | Empty | Copine-3 OS=Homo sapiens GN=CPNE3 PE=1 SV=1                                                     | CPNE3_HUMAN | 60 kDa | TRUE | .229855168  | 2.3         | 15.472  | 1.0432  | 3.98    | 13.414  | 23.72   | 9.78    |
| 392 | TRUE | Empty | Copper transport protein ATOX1 OS=Homo sapiens GN=ATOX1<br>PE=1 SV=1                            | ATOX1_HUMAN | 7 kDa  |      | 0.348672532 | 0.4         | 0       | 3.1295  | 4.73    | 1.04    | 1.43    | 0       |
| 393 | TRUE | Empty | Core histone macro-H2A.1 OS=Homo sapiens GN=H2AFY PE=1<br>SV=4                                  | H2AY_HUMAN  | ?      | TRUE | .192496369  | 2.4         | 4.06    | 0       | 0.99746 | 5.17    | 4.57    | 2.94    |
| 394 | TRUE | Empty | Coronin-1A OS=Homo sapiens GN=CORO1A PE=1 SV=4                                                  | COR1A_HUMAN | 51 kDa | TRUE | .063017666  | INF         | 0       | 0       | 0       | 3.61    | 0.84713 | 1.96    |
| 395 | TRUE | Empty | Coronin-1B OS=Homo sapiens GN=CORO1B PE=1 SV=1                                                  | COR1B_HUMAN | 54 kDa | TRUE | .229574336  | 7           | 0       | 0       | 0.99746 | 2.57    | 0       | 4.89    |
| 396 | TRUE | Empty | Coronin-7 OS=Homo sapiens GN=CORO7 PE=1 SV=2                                                    | CORO7_HUMAN | ?      | TRUE | .278146739  | 3           | 4.06    | 0       | 0       | 7.22    | 5.0828  | 0.93978 |
| 397 | TRUE | Empty | COUP transcription factor 2 OS=Homo sapiens GN=NR2F2 PE=1<br>SV=1                               | COT2_HUMAN  | ?      | TRUE | .094905451  | INF         | 0       | 0       | 0       | 0.74522 | 0.84713 | 2.94    |
| 398 | TRUE | Empty | Crk-like protein OS=Homo sapiens GN=CRKL PE=1 SV=1                                              | CRKL_HUMAN  | 34 kDa | TRUE | .799101856  | 1.3         | 0       | 4.1727  | 0.99746 | 3.61    | 0       | 2.94    |
| 399 | TRUE | Empty | C-terminal-binding protein 2 OS=Homo sapiens GN=CTBP2 PE=1<br>SV=1                              | CTBP2_HUMAN | ?      | TRUE | .024028039  | 8.799367331 | 0       | 1.0432  | 0       | 3.61    | 1.43    | 3.91    |
| 400 | TRUE | Empty | CTP synthase 1 OS=Homo sapiens GN=CTPS1 PE=1 SV=2                                               | PYRG1_HUMAN | ?      | TRUE | .374640578  | 0.7         | 2.03    | 3.1295  | 1.49    | 0.74522 | 1.43    | 2.94    |
| 401 | TRUE | Empty | CTP synthase 2 OS=Homo sapiens GN=CTPS2 PE=1 SV=1                                               | PYRG2_HUMAN | 66 kDa | TRUE | .687473951  | 1.3         | 0       | 2.0863  | 1.49    | 0.74522 | 1.43    | 2.94    |
| 402 | TRUE | Empty | CUGBP Elav-like family member 1 OS=Homo sapiens GN=CELF1<br>PE=1 SV=2                           | CELF1_HUMAN | ?      | TRUE | 0.00055667  | 11.8435827  | 0       | 0.99746 | 0       | 3.61    | 3.85    | 4.89    |
| 403 | TRUE | Empty | Cullin-1 OS=Homo sapiens GN=CUL1 PE=1 SV=2                                                      | CUL1_HUMAN  | 90 kDa | TRUE | 0.03308882  | 3.48079121  | 0.99746 | 0       | 0       | 0.74522 | 0.84713 | 1.96    |
| 404 | TRUE | Empty | Cullin-2 OS=Homo sapiens GN=CUL2 PE=1 SV=2                                                      | CUL2_HUMAN  | ?      |      | 0.06372838  | 9.4         | 0       | 0       | 0.99746 | 1.04    | 5.0828  | 2.94    |
| 405 | TRUE | Empty | Cullin-associated NEDD8-dissociated protein 1 OS=Homo sapiens<br>GN=CAND1 PE=1 SV=2             | CAND1_HUMAN | ?      | TRUE | .019714117  | 2.98292363  | 28.734  | 3.1295  | 11.969  | 46.949  | 41.51   | 42.29   |
| 406 | TRUE | Empty | Cyclin-dependent kinase 1 OS=Homo sapiens GN=CDK1 PE=1 SV=3                                     | CDK1_HUMAN  | ?      | TRUE | .084566581  | INF         | 0       | 0       | 0       | 2.09    | 0.84713 | 0.93978 |
| 407 | TRUE | Empty | Cyclin-dependent kinase 9 OS=Homo sapiens GN=CDK9 PE=1 SV=3                                     | CDK9_HUMAN  | ?      | TRUE | .136121777  | INF         | 0       | 0       | 0       | 1.04    | 0       | 0.93978 |
| 408 | TRUE | Empty | Cyclin-dependent-like kinase 5 OS=Homo sapiens GN=CDK5 PE=1<br>SV=3                             | CDK5_HUMAN  | ?      | TRUE | .152478611  | INF         | 0       | 0       | 0       | 1.04    | 0       | 2.94    |
| 409 | TRUE | Empty | Cyclin-G-associated kinase OS=Homo sapiens GN=GAK PE=1 SV=2                                     | GAK_HUMAN   | ?      | TRUE | .217218164  | INF         | 0       | 0       | 0       | 0       | 0.84713 | 2.94    |
| 410 | TRUE | Empty | Cystathionine beta-synthase OS=Homo sapiens GN=CBS PE=1<br>SV=2                                 | CBS_HUMAN   | ?      | TRUE | .310947221  | 3.2         | 0       | 0       | 0.99746 | 1.04    | 1.43    | 0       |
| 411 | TRUE | Empty | Cystatin-B OS=Homo sapiens GN=CSTB PE=1 SV=2                                                    | CYTB_HUMAN  | 11 kDa |      | 0.168960308 | 0.6         | 22.103  | 29.209  | 15.959  | 15.65   | 18.637  | 8.81    |
| 412 | TRUE | Empty | Cysteine and glycine-rich protein 1 OS=Homo sapiens GN=CSRP1<br>PE=1 SV=3                       | CSRP1_HUMAN | 21 kDa | TRUE | .370063286  | 0.5         | 4.06    | 12.518  | 24.936  | 2.09    | 10.166  | 9.78    |
| 413 | TRUE | Empty | Cysteine and histidine-rich domain-containing protein 1<br>OS=Homo sapiens GN=CHORDC1 PE=1 SV=2 | CHRD1_HUMAN | ?      |      | 0.136121777 | INF         | 0       | 0       | 0       | 1.04    | 0       | 0.93978 |
| 414 | TRUE | Empty | Cysteine-rich protein 2 OS=Homo sapiens GN=CRIP2 PE=1 SV=1                                      | CRIP2_HUMAN | ?      | TRUE | .226008646  | 0.5         | 4.06    | 25.036  | 22.942  | 8.74    | 9.85    | 6.85    |
| 415 | TRUE | Empty | Cytochrome b-c1 complex subunit 1, mitochondrial OS=Homo sapiens<br>GN=UQCRC1 PE=1 SV=3         | QCR1_HUMAN  | 53 kDa | TRUE | .111135393  | 1.8         | 6.631   | 8.54    | 5.47    | 9.78    | 10.166  | 17.856  |
| 416 | TRUE | Empty | Cytochrome b-c1 complex subunit 2, mitochondrial OS=Homo sapiens<br>GN=UQCRC2 PE=1 SV=3         | QCR2_HUMAN  | 48 kDa |      | 0.186328973 | 1.4         | 6.631   | 11.475  | 5.47    | 14.159  | 9.85    | 11.277  |

|     |      |       |                                                                                                |             |         |             |             |             |        |         |         |         |         |         |
|-----|------|-------|------------------------------------------------------------------------------------------------|-------------|---------|-------------|-------------|-------------|--------|---------|---------|---------|---------|---------|
| 417 | TRUE | Empty | Cytochrome b-c1 complex subunit 7 OS=Homo sapiens<br>GN=UQCRB PE=1 SV=2                        | QCR7_HUMAN  | ?       | 0.701916933 | 1.3         | 0           | 4.1727 | 1.49    | 4.13    | 0.84713 | 2.94    |         |
| 418 | TRUE | Empty | Cytochrome b-c1 complex subunit Rieske, mitochondrial<br>OS=Homo sapiens GN=UQCRFS1 PE=1 SV=2  | UCRI_HUMAN  | 30 kDa  | 0.287811707 | 1.9         | 0           | 12.518 | 3.98    | 11.923  | 6.71    | 13.157  |         |
| 419 | TRUE | Empty | Cytochrome c OS=Homo sapiens GN=CYCS PE=1 SV=2                                                 | CYC_HUMAN   | 12 kDa  | 0.095090395 | 2.1         | 4.06        | 4.1727 | 5.47    | 6.707   | 9.85    | 15.037  |         |
| 420 | TRUE | Empty | Cytochrome c oxidase subunit 2 OS=Homo sapiens GN=MT-CO2<br>PE=1 SV=1                          | COX2_HUMAN  | 26 kDa  | 0.585522401 | 1.7         | 13.262      | 0      | 0       | 8.74    | 3.85    | 10.338  |         |
| 421 | TRUE | Empty | Cytochrome c oxidase subunit 4 isoform 1, mitochondrial<br>OS=Homo sapiens GN=COX4I1 PE=1 SV=1 | COX4I_HUMAN | 20 kDa  | TRUE        | .000650923  | 14.93423295 | 0      | 0.99746 | 0       | 5.17    | 4.57    | 4.89    |
| 422 | TRUE | Empty | Cytochrome c oxidase subunit 5A, mitochondrial OS=Homo<br>sapiens GN=COX5A PE=1 SV=2           | COX5A_HUMAN | 17 kDa  | 0.207817272 | 12          | 2.03        | 0      | 0       | 20.121  | 3.85    | 3.91    |         |
| 423 | TRUE | Empty | Cytochrome c oxidase subunit 5B, mitochondrial OS=Homo<br>sapiens GN=COX5B PE=1 SV=2           | COX5B_HUMAN | 14 kDa  | 0.064300471 | 3.3         | 0           | 4.1727 | 0.99746 | 4.13    | 5.0828  | 7.83    |         |
| 424 | TRUE | Empty | Cytochrome c oxidase subunit 6B1 OS=Homo sapiens GN=COX6B1<br>PE=1 SV=2                        | CX6B1_HUMAN | 10 kDa  | 0.499627956 | 0.6         | 0           | 7.22   | 5.47    | 3.61    | 2.14    | 1.96    |         |
| 425 | TRUE | Empty | Cytochrome c oxidase subunit 7A2, mitochondrial OS=Homo<br>sapiens GN=COX7A2 PE=1 SV=1         | CX7A2_HUMAN | 9 kDa   | 0.946101728 | 1           | 4.06        | 0      | 1.49    | 0.74522 | 2.14    | 2.94    |         |
| 426 | TRUE | Empty | Cytochrome c1, heme protein, mitochondrial OS=Homo sapiens<br>GN=CYC1 PE=1 SV=3                | CY1_HUMAN   | 35 kDa  | 0.061088963 | INF         | 0           | 0      | 0       | 2.57    | 1.43    | 5.87    |         |
| 427 | TRUE | Empty | Cytochrome P450 1B1 OS=Homo sapiens GN=CYP1B1 PE=1 SV=2                                        | CP1B1_HUMAN | 61 kDa  | 0.217218164 | INF         | 0           | 0      | 0       | 0       | 0.84713 | 2.94    |         |
| 428 | TRUE | Empty | Cytoplasmic aconitate hydratase OS=Homo sapiens GN=ACO1<br>PE=1 SV=3                           | ACOC_HUMAN  | 98 kDa  | 0.001501257 | 11.94584244 | 0.99746     | 0      | 0       | 2.09    | 4.57    | 4.89    |         |
| 429 | TRUE | Empty | Cytoplasmic dynein 1 heavy chain 1 OS=Homo sapiens<br>GN=DYNC1H1 PE=1 SV=5                     | DYHC1_HUMAN | 532 kDa | TRUE        | .019664439  | 9.149826572 | 13.262 | 0       | 0       | 26.083  | 39.815  | 55.447  |
| 430 | TRUE | Empty | Cytoplasmic dynein 1 light intermediate chain 1 OS=Homo sapiens<br>GN=DYNC1LI1 PE=1 SV=3       | DC1L1_HUMAN | 57 kDa  | TRUE        | .832416383  | 0.9         | 0      | 4.1727  | 6.22    | 5.65    | 3.85    | 0.93978 |
| 431 | TRUE | Empty | Cytoplasmic dynein 1 light intermediate chain 2 OS=Homo sapiens<br>GN=DYNC1LI2 PE=1 SV=1       | DC1L2_HUMAN | ?       | TRUE        | .750161253  | 0.8         | 0      | 3.1295  | 2.24    | 1.04    | 2.14    | 0.93978 |
| 432 | TRUE | Empty | Cytoplasmic FMR1-interacting protein 1 OS=Homo sapiens<br>GN=CYFIP1 PE=1 SV=1                  | CYFP1_HUMAN | ?       | TRUE        | .000157434  | 20.215748   | 0      | 0       | 0.99746 | 5.17    | 7.42    | 6.85    |
| 433 | TRUE | Empty | Cytoskeleton-associated protein 4 OS=Homo sapiens GN=CKAP4<br>PE=1 SV=2                        | CKAP4_HUMAN | 66 kDa  | TRUE        | .006165014  | 18.03420689 | 0      | 0.99746 | 0       | 7.22    | 6.71    | 3.91    |
| 434 | TRUE | Empty | Cytoskeleton-associated protein 5 OS=Homo sapiens GN=CKAP5<br>PE=1 SV=3                        | CKAP5_HUMAN | ?       | TRUE        | .040274969  | 4.032853448 | 0      | 0       | 0.99746 | 2.57    | 0.84713 | 0.93978 |
| 435 | TRUE | Empty | Cytosol aminopeptidase OS=Homo sapiens GN=LAP3 PE=1 SV=3                                       | AMPL_HUMAN  | ?       | TRUE        | 0.90686667  | 1           | 11.052 | 32.338  | 22.942  | 18.63   | 23.72   | 21.615  |
| 436 | TRUE | Empty | Cytosolic acyl coenzyme A thioester hydrolase OS=Homo sapiens<br>GN=ACOT7 PE=1 SV=3            | BACH_HUMAN  | ?       | TRUE        | .177116089  | 3.5         | 2.03   | 2.0863  | 1.49    | 11.178  | 10.166  | 0.93978 |
| 437 | TRUE | Empty | Cytosolic Fe-S cluster assembly factor NUBP1 OS=Homo sapiens<br>GN=NUBP1 PE=1 SV=2             | NUBP1_HUMAN | ?       | TRUE        | .874205584  | 0.9         | 0      | 5.59    | 5.47    | 2.57    | 5.99    | 1.96    |
| 438 | TRUE | Empty | Cytosolic non-specific dipeptidase OS=Homo sapiens GN=CNDP2<br>PE=1 SV=2                       | CNDP2_HUMAN | ?       | 0.038788539 | 3.556178172 | 0           | 2.0863 | 0.99746 | 3.61    | 2.14    | 4.89    |         |
| 439 | TRUE | Empty | Cytosolic purine 5'-nucleotidase OS=Homo sapiens GN=NT5C2<br>PE=1 SV=1                         | 5NTC_HUMAN  | ?       | TRUE        | .008306911  | 22.21884586 | 0      | 1.0432  | 0       | 5.65    | 7.42    | 10.338  |
| 440 | TRUE | Empty | D-3-phosphoglycerate dehydrogenase OS=Homo sapiens<br>GN=PHGDH PE=1 SV=4                       | SERA_HUMAN  | 57 kDa  | 0.006668773 | 2.077804611 | 15.472      | 18.777 | 9.46    | 29.809  | 33.885  | 28.194  |         |
| 441 | TRUE | Empty | DAZ-associated protein 1 OS=Homo sapiens GN=DAZAP1 PE=1<br>SV=1                                | DAZP1_HUMAN | ?       | 0.234163855 | 0.1         | 0           | 5.59   | 1.49    | 0.74522 | 0       | 0       |         |
| 442 | TRUE | Empty | DBIRD complex subunit ZNF326 OS=Homo sapiens GN=ZNF326<br>PE=1 SV=2                            | ZN326_HUMAN | ?       | TRUE        | .792670078  | 0.8         | 0      | 1.0432  | 2.24    | 1.04    | 0.84713 | 0.93978 |
| 443 | TRUE | Empty | dCTP pyrophosphatase 1 OS=Homo sapiens GN=DCTPP1 PE=1<br>SV=1                                  | DCTP1_HUMAN | 19 kDa  | 0.989266989 | 1           | 8.13        | 3.1295 | 5.47    | 8.26    | 2.14    | 6.85    |         |

|     |      |       |                                                                                                                                                           |             |         |      |             |             |         |         |         |        |         |         |
|-----|------|-------|-----------------------------------------------------------------------------------------------------------------------------------------------------------|-------------|---------|------|-------------|-------------|---------|---------|---------|--------|---------|---------|
| 444 | TRUE | Empty | DDB1- and CUL4-associated factor 7 OS=Homo sapiens GN=DCAF7<br>PE=1 SV=1                                                                                  | DCAF7_HUMAN | ?       | TRUE | .116315977  | 0           | 0       | 2.0863  | 1.49    | 0      | 0       | 0       |
| 445 | TRUE | Empty | D-dopachrome decarboxylase OS=Homo sapiens GN=DDT PE=1<br>SV=3                                                                                            | DOPD_HUMAN  | ?       |      | 0.914994424 | 1.1         | 0       | 14.604  | 5.47    | 6.707  | 5.0828  | 10.338  |
| 446 | TRUE | Empty | DDRKG domain-containing protein 1 OS=Homo sapiens<br>GN=DDRKG1 PE=1 SV=2                                                                                  | DDRKG_HUMAN | ?       | TRUE | 0.00734386  | 8.16784633  | 0.99746 | 0       | 0       | 3.61   | 2.14    | 1.96    |
| 447 | TRUE | Empty | Dehydrogenase/reductase SDR family member 4 OS=Homo<br>sapiens GN=DHRS4 PE=1 SV=3                                                                         | DHRS4_HUMAN | ?       | TRUE | .036639133  | 5.722164297 | 0       | 0.99746 | 0       | 2.09   | 0.84713 | 1.96    |
| 448 | TRUE | Empty | Delta(14)-sterol reductase OS=Homo sapiens GN=TM7SF2 PE=2<br>SV=3                                                                                         | ERG24_HUMAN | ?       |      | 0.169759736 | INF         | 0       | 0       | 0       | 0      | 0.84713 | 1.96    |
| 449 | TRUE | Empty | Delta(24)-sterol reductase OS=Homo sapiens GN=DHCR24 PE=1<br>SV=2                                                                                         | DHC24_HUMAN | ?       | TRUE | 0.01245054  | 4.882180739 | 0       | 0       | 0.99746 | 2.57   | 1.43    | 0.93978 |
| 450 | TRUE | Empty | Delta(3,5)-Delta(2,4)-dienoyl-CoA isomerase, mitochondrial<br>OS=Homo sapiens GN=ECH1 PE=1 SV=2                                                           | ECH1_HUMAN  | 36 kDa  |      | 0.12357825  | 2.2         | 8.13    | 3.1295  | 1.49    | 12.669 | 11.013  | 6.85    |
| 451 | TRUE | Empty | Delta-1-pyrroline-5-carboxylate synthase OS=Homo sapiens<br>GN=ALDH18A1 PE=1 SV=2                                                                         | P5CS_HUMAN  | ?       |      | 0.06534674  | 4.8         | 2.03    | 0       | 0       | 4.13   | 4.57    | 1.96    |
| 452 | TRUE | Empty | Delta-aminolevulinic acid dehydratase OS=Homo sapiens<br>GN=ALAD PE=1 SV=1                                                                                | HEM2_HUMAN  | ?       |      | 0.766616669 | 0.8         | 0       | 6.259   | 4.73    | 0      | 4.57    | 4.89    |
| 453 | TRUE | Empty | Deoxyhypusine synthase OS=Homo sapiens GN=DHPS PE=1 SV=1                                                                                                  | DHYS_HUMAN  | ?       |      | 0.373900966 | 0           | 0       | 0       | 1.49    | 0      | 0       | 0       |
| 454 | TRUE | Empty | Deoxyribonuclease-2-alpha OS=Homo sapiens GN=DNASE2 PE=1<br>SV=2                                                                                          | DNS2A_HUMAN | ?       |      | 0.799197877 | 1.2         | 0       | 3.1295  | 0.99746 | 1.04   | 2.14    | 0.93978 |
| 455 | TRUE | Empty | Deoxyuridine 5'-triphosphate nucleotidohydrolase, mitochondrial<br>OS=Homo sapiens GN=DUT PE=1 SV=4                                                       | DUT_HUMAN   | ?       | TRUE | .818394512  | 1.1         | 2.03    | 3.1295  | 6.22    | 4.13   | 3.85    | 5.87    |
| 456 | TRUE | Empty | Derlin-1 OS=Homo sapiens GN=DERL1 PE=1 SV=1                                                                                                               | DERL1_HUMAN | ?       |      | 0.125523833 | 6.4         | 2.03    | 0       | 0       | 2.57   | 3.85    | 8.81    |
| 457 | TRUE | Empty | Desmoplakin OS=Homo sapiens GN=DSP PE=1 SV=3                                                                                                              | DESP_HUMAN  | ?       | TRUE | .038995226  | 3.790319591 | 4.06    | 2.0863  | 6.22    | 23.847 | 16.943  | 10.338  |
| 458 | TRUE | Empty | Destrin OS=Homo sapiens GN=DSTN PE=1 SV=3                                                                                                                 | DEST_HUMAN  | ?       | TRUE | .136263267  | 0.5         | 6.631   | 18.777  | 17.954  | 8.26   | 5.0828  | 6.85    |
| 459 | TRUE | Empty | Developmentally-regulated GTP-binding protein 2 OS=Homo<br>sapiens GN=DRG2 PE=1 SV=1                                                                      | DRG2_HUMAN  | 41 kDa  | TRUE | .373900966  | INF         | 0       | 0       | 0       | 1.04   | 0       | 0       |
| 460 | TRUE | Empty | Diablo homolog, mitochondrial OS=Homo sapiens GN=DIABLO<br>PE=1 SV=1                                                                                      | DBLOH_HUMAN | ?       | TRUE | .316446148  | 0.3         | 0       | 3.1295  | 3.98    | 2.57   | 0       | 0       |
| 461 | TRUE | Empty | Dihydrolipoyl dehydrogenase, mitochondrial OS=Homo sapiens<br>GN=DLD PE=1 SV=2                                                                            | DLDH_HUMAN  | ?       | TRUE | .060888089  | 1.7         | 13.262  | 11.475  | 6.22    | 15.65  | 16.096  | 22.555  |
| 462 | TRUE | Empty | Dihydrolipoyllysine-residue succinyltransferase component of 2-<br>oxoglutarate dehydrogenase complex, mitochondrial OS=Homo<br>sapiens GN=DLST PE=1 SV=4 | ODO2_HUMAN  | ?       | TRUE | .162453876  | 3.3         | 0       | 3.1295  | 0.99746 | 2.57   | 7.42    | 3.91    |
| 463 | TRUE | Empty | Dihydropyrimidinase-related protein 2 OS=Homo sapiens<br>GN=DPYSL2 PE=1 SV=1                                                                              | DPYL2_HUMAN | ?       | TRUE | 0.04347111  | 3.214422229 | 0       | 2.0863  | 1.49    | 5.65   | 5.0828  | 2.94    |
| 464 | TRUE | Empty | Dipeptidyl peptidase 2 OS=Homo sapiens GN=DPP7 PE=1 SV=3                                                                                                  | DPP2_HUMAN  | 54 kDa  | TRUE | 0.96154385  | 1.1         | 0       | 0       | 2.24    | 2.57   | 0       | 0.93978 |
| 465 | TRUE | Empty | Dipeptidyl peptidase 3 OS=Homo sapiens GN=DPP3 PE=1 SV=2                                                                                                  | DPP3_HUMAN  | ?       |      | 0.008244721 | 3.870805856 | 6.631   | 3.1295  | 2.24    | 20.866 | 14.401  | 14.097  |
| 466 | TRUE | Empty | DNA damage-binding protein 1 OS=Homo sapiens GN=DDB1 PE=1<br>SV=1                                                                                         | DDB1_HUMAN  | ?       |      | 0.180455608 | 2           | 0       | 7.22    | 12.967  | 14.904 | 10.166  | 15.037  |
| 467 | TRUE | Empty | DNA fragmentation factor subunit alpha OS=Homo sapiens<br>GN=DFFA PE=1 SV=1                                                                               | DFFA_HUMAN  | ?       |      | 0.466013214 | 0.5         | 0       | 4.1727  | 5.47    | 0      | 3.85    | 1.96    |
| 468 | TRUE | Empty | DNA polymerase delta catalytic subunit OS=Homo sapiens<br>GN=POLD1 PE=1 SV=2                                                                              | DPOD1_HUMAN | 124 kDa | TRUE | .061814651  | 4.9         | 0       | 0       | 0.99746 | 2.57   | 1.43    | 0.93978 |
| 469 | TRUE | Empty | DNA repair protein XRCC1 OS=Homo sapiens GN=XRCC1 PE=1<br>SV=2                                                                                            | XRCC1_HUMAN | 69 kDa  | TRUE | .313355175  | 2.7         | 0       | 1.0432  | 1.49    | 4.13   | 0       | 3.91    |
| 470 | TRUE | Empty | DNA replication licensing factor MCM2 OS=Homo sapiens<br>GN=MCM2 PE=1 SV=4                                                                                | MCM2_HUMAN  | 102 kDa |      | 0.037396137 | 24.01239147 | 0.99746 | 0       | 0       | 3.61   | 12.707  | 7.83    |

|     |      |       |                                                                                                                     |             |         |      |             |             |         |        |         |         |         |         |
|-----|------|-------|---------------------------------------------------------------------------------------------------------------------|-------------|---------|------|-------------|-------------|---------|--------|---------|---------|---------|---------|
| 471 | TRUE | Empty | DNA replication licensing factor MCM3 OS=Homo sapiens<br>GN=MCM3 PE=1 SV=3                                          | MCM3_HUMAN  | ?       |      | 0.084741888 | 2.3         | 11.052  | 1.0432 | 4.73    | 15.65   | 10.166  | 14.097  |
| 472 | TRUE | Empty | DNA replication licensing factor MCM4 OS=Homo sapiens<br>GN=MCM4 PE=1 SV=5                                          | MCM4_HUMAN  | 97 kDa  | TRUE | .001582051  | 3.578173166 | 2.03    | 4.1727 | 6.22    | 14.904  | 16.943  | 15.976  |
| 473 | TRUE | Empty | DNA replication licensing factor MCM5 OS=Homo sapiens<br>GN=MCM5 PE=1 SV=5                                          | MCM5_HUMAN  | 82 kDa  | TRUE | .002170477  | 27.81254386 | 0.99746 | 0      | 0       | 9.78    | 6.71    | 11.277  |
| 474 | TRUE | Empty | DNA replication licensing factor MCM6 OS=Homo sapiens<br>GN=MCM6 PE=1 SV=1                                          | MCM6_HUMAN  | 93 kDa  | TRUE | .000471505  | 11.70519839 | 2.03    | 0      | 0       | 8.26    | 8.13    | 8.81    |
| 475 | TRUE | Empty | DNA replication licensing factor MCM7 OS=Homo sapiens<br>GN=MCM7 PE=1 SV=4                                          | MCM7_HUMAN  | ?       | TRUE | .003108288  | 20.95350844 | 0       | 1.0432 | 0       | 5.17    | 9.85    | 6.85    |
| 476 | TRUE | Empty | DNA topoisomerase 1 OS=Homo sapiens GN=TOP1 PE=1 SV=2                                                               | TOP1_HUMAN  | 91 kDa  | TRUE | .001858442  | 9.709068252 | 0       | 1.0432 | 0       | 2.09    | 3.85    | 3.91    |
| 477 | TRUE | Empty | DNA topoisomerase 2-beta OS=Homo sapiens GN=TOP2B PE=1<br>SV=3                                                      | TOP2B_HUMAN | ?       | TRUE | .437700045  | 2           | 2.03    | 0      | 0       | 0.74522 | 1.43    | 1.96    |
| 478 | TRUE | Empty | DNA-(apurinic or apyrimidinic site) lyase OS=Homo sapiens<br>GN=APEX1 PE=1 SV=2                                     | APEX1_HUMAN | 36 kDa  |      | 0.022424161 | 5.632645296 | 2.03    | 0      | 1.49    | 11.178  | 5.99    | 6.85    |
| 479 | TRUE | Empty | DNA-dependent protein kinase catalytic subunit OS=Homo<br>sapiens GN=PRKDC PE=1 SV=3                                | PRKDC_HUMAN | ?       | TRUE | .001886819  | 9.913680782 | 11.052  | 0      | 0       | 38.751  | 31.344  | 39.471  |
| 480 | TRUE | Empty | DNA-directed RNA polymerase II subunit RPB2 OS=Homo sapiens<br>GN=POLR2B PE=1 SV=1                                  | RPB2_HUMAN  | 134 kDa | TRUE | 0.63960284  | 2.2         | 0       | 0      | 0.99746 | 2.57    | 0       | 0       |
| 481 | TRUE | Empty | DNA-directed RNA polymerase III subunit RPC1 OS=Homo sapiens<br>GN=POLR3A PE=1 SV=2                                 | RPC1_HUMAN  | 156 kDa | TRUE | 0.43108597  | 0.1         | 0       | 6.259  | 0       | 0.74522 | 0       | 0       |
| 482 | TRUE | Empty | DNA-directed RNA polymerases I and III subunit RPAC1 OS=Homo<br>sapiens GN=POLR1C PE=1 SV=1                         | RPAC1_HUMAN | ?       |      | 0.00485573  | 6.868646362 | 0       | 0      | 0.99746 | 1.04    | 2.14    | 2.94    |
| 483 | TRUE | Empty | DnaJ homolog subfamily A member 1 OS=Homo sapiens<br>GN=DNAJA1 PE=1 SV=2                                            | DNJA1_HUMAN | ?       | TRUE | 0.57220724  | 0.7         | 0       | 12.518 | 9.46    | 5.17    | 2.14    | 6.85    |
| 484 | TRUE | Empty | DnaJ homolog subfamily B member 1 OS=Homo sapiens<br>GN=DNAJB1 PE=1 SV=4                                            | DNJB1_HUMAN | ?       | TRUE | .177913222  | 0.4         | 4.06    | 13.561 | 5.47    | 4.13    | 2.14    | 2.94    |
| 485 | TRUE | Empty | DnaJ homolog subfamily B member 6 OS=Homo sapiens<br>GN=DNAJB6 PE=1 SV=2                                            | DNJB6_HUMAN | ?       | TRUE | .041547618  | 5.170061957 | 0       | 0      | 0.99746 | 1.04    | 0.84713 | 2.94    |
| 486 | TRUE | Empty | DnaJ homolog subfamily C member 13 OS=Homo sapiens<br>GN=DNAJC13 PE=1 SV=5                                          | DJC13_HUMAN | 254 kDa |      | 0.074940238 | 4.2         | 0       | 0      | 0.99746 | 1.04    | 0.84713 | 1.96    |
| 487 | TRUE | Empty | DnaJ homolog subfamily C member 9 OS=Homo sapiens<br>GN=DNAJC9 PE=1 SV=1                                            | DNJC9_HUMAN | 30 kDa  |      | 0.528254655 | 0.3         | 0       | 0      | 2.24    | 0       | 0.84713 | 0       |
| 488 | TRUE | Empty | DNL-type zinc finger protein OS=Homo sapiens GN=DNLZ PE=1<br>SV=1                                                   | DNLZ_HUMAN  | 19 kDa  |      | 0.373900966 | INF         | 0       | 0      | 0       | 1.04    | 0       | 0       |
| 489 | TRUE | Empty | Dolichol-phosphate mannosyltransferase subunit 1 OS=Homo<br>sapiens GN=DPM1 PE=1 SV=1                               | DPM1_HUMAN  | 30 kDa  |      | 0.219982104 | 4.8         | 0       | 0      | 0.99746 | 2.57    | 2.14    | 0       |
| 490 | TRUE | Empty | Dolichyl-diphosphooligosaccharide--protein glycosyltransferase<br>48 kDa subunit OS=Homo sapiens GN=DDOST PE=1 SV=4 | OST48_HUMAN | ?       | TRUE | .201766144  | 3           | 15.472  | 0      | 0       | 9.78    | 12.707  | 23.495  |
| 491 | TRUE | Empty | Dolichyl-diphosphooligosaccharide--protein glycosyltransferase<br>subunit 1 OS=Homo sapiens GN=RPN1 PE=1 SV=1       | RPN1_HUMAN  | 69 kDa  |      | 0.029045105 | 4.922366992 | 11.052  | 0      | 0       | 14.904  | 16.943  | 22.555  |
| 492 | TRUE | Empty | Dolichyl-diphosphooligosaccharide--protein glycosyltransferase<br>subunit 2 OS=Homo sapiens GN=RPN2 PE=1 SV=3       | RPN2_HUMAN  | ?       | TRUE | .591379601  | 1.6         | 22.103  | 0      | 0       | 12.669  | 10.166  | 12.217  |
| 493 | TRUE | Empty | Dolichyl-diphosphooligosaccharide--protein glycosyltransferase<br>subunit STT3A OS=Homo sapiens GN=STT3A PE=1 SV=2  | STT3A_HUMAN | ?       | TRUE | .226345874  | INF         | 0       | 0      | 0       | 0       | 3.85    | 0.93978 |
| 494 | TRUE | Empty | Dolichyl-diphosphooligosaccharide--protein glycosyltransferase<br>subunit STT3B OS=Homo sapiens GN=STT3B PE=1 SV=1  | STT3B_HUMAN | 94 kDa  | TRUE | .041547618  | 5.170061957 | 0.99746 | 0      | 0       | 1.04    | 0.84713 | 2.94    |

|     |      |       |                                                                                          |                         |        |      |             |             |         |         |         |         |         |         |
|-----|------|-------|------------------------------------------------------------------------------------------|-------------------------|--------|------|-------------|-------------|---------|---------|---------|---------|---------|---------|
| 495 | TRUE | Empty | Double-strand-break repair protein rad21 homolog OS=Homo sapiens GN=RAD21 PE=1 SV=2      | RAD21_HUMAN             | 72 kDa | TRUE | .089717672  | 4.2         | 0       | 1.0432  | 0.99746 | 2.57    | 1.43    | 4.89    |
| 496 | TRUE | Empty | Double-stranded RNA-binding protein Staufen homolog 1 OS=Homo sapiens GN=STAU1 PE=1 SV=2 | STAU1_HUMAN             | ?      | TRUE | .982802861  | 1           | 0       | 4.1727  | 8.71    | 2.57    | 5.0828  | 5.87    |
| 497 | TRUE | Empty | Double-stranded RNA-specific adenosine deaminase OS=Homo sapiens GN=ADAR PE=1 SV=4       | DSRAD_HUMAN             | ?      |      | 0.011744795 | 8.55793716  | 0       | 0       | 0.99746 | 2.57    | 2.14    | 3.91    |
| 498 | TRUE | Empty | Drebrin-like protein OS=Homo sapiens GN=DBNL PE=1 SV=1                                   | DBNL_HUMAN              | ?      |      | 0.245785844 | 0.3         | 0       | 18.777  | 13.964  | 1.04    | 5.0828  | 2.94    |
| 499 | TRUE | Empty | D-tyrosyl-tRNA(Tyr) deacylase 1 OS=Homo sapiens GN=DTD1 PE=1 SV=2                        | DTD1_HUMAN              | 23 kDa |      | 0.256806469 | 0.4         | 8.13    | 2.0863  | 3.98    | 0.74522 | 1.43    | 3.91    |
| 500 | TRUE | Empty | Dual specificity protein phosphatase 3 OS=Homo sapiens GN=DUSP3 PE=1 SV=1                | DUS3_HUMAN              | ?      |      | 0.060312045 | 2.7         | 0       | 2.0863  | 0.99746 | 2.57    | 3.85    | 2.94    |
| 501 | TRUE | Empty | Dynactin subunit 1 OS=Homo sapiens GN=DCTN1 PE=1 SV=3                                    | DCTN1_HUMAN             | ?      | TRUE | .000114504  | 5.077196078 | 0.99746 | 0       | 0       | 1.04    | 1.43    | 1.96    |
| 502 | TRUE | Empty | Dynactin subunit 2 OS=Homo sapiens GN=DCTN2 PE=1 SV=4                                    | DCTN2_HUMAN             | ?      |      | 0.628370931 | 1.3         | 2.03    | 3.1295  | 8.71    | 4.13    | 5.99    | 7.83    |
| 503 | TRUE | Empty | Dynamamin-1-like protein OS=Homo sapiens GN=DNM1L PE=1 SV=2                              | DNM1L_HUMAN             | ?      |      | 0.028213971 | 5.91725984  | 0       | 0.99746 | 0       | 2.57    | 0.84713 | 2.94    |
| 504 | TRUE | Empty | Dynamamin-2 OS=Homo sapiens GN=DNM2 PE=1 SV=2                                            | DYN2_HUMAN              | ?      | TRUE | .011688212  | 5.462358141 | 2.03    | 3.1295  | 0       | 8.26    | 12.707  | 7.83    |
| 505 | TRUE | Empty | Dynamamin-like 120 kDa protein, mitochondrial OS=Homo sapiens GN=OPA1 PE=1 SV=3          | OPA1_HUMAN              | ?      | TRUE | .373900966  | INF         | 0       | 0       | 0       | 0       | 0       | 1.96    |
| 506 | TRUE | Empty | Dynein assembly factor 5, axonemal OS=Homo sapiens GN=DNAAF5 PE=1 SV=4                   | DAAF5_HUMAN             | ?      | TRUE | .217218164  | INF         | 0       | 0       | 0       | 0       | 0.84713 | 2.94    |
| 507 | TRUE | Empty | Dynein light chain 2, cytoplasmic OS=Homo sapiens GN=DYNLL2 PE=1 SV=1                    | DYL2_HUMAN              | 10 kDa | TRUE | .097375341  | 0.4         | 4.06    | 2.0863  | 4.73    | 1.04    | 2.14    | 0       |
| 508 | TRUE | Empty | Dynein light chain roadblock-type 1 OS=Homo sapiens GN=DYNLRB1 PE=1 SV=3                 | DLRB1_HUMAN             | ?      | TRUE | .756551235  | 1.3         | 0       | 1.0432  | 2.24    | 0.74522 | 0.84713 | 3.91    |
| 509 | TRUE | Empty | E2 ubiquitin-conjugating enzyme OS=Homo sapiens GN=UBE2O PE=1 SV=3                       | sp Q9C0C9 UBE2O_141 kDa |        | TRUE | 0.39870266  | 3.6         | 0       | 0       | 0.99746 | 0.74522 | 0       | 2.94    |
| 510 | TRUE | Empty | E3 ubiquitin/ISG15 ligase TRIM25 OS=Homo sapiens GN=TRIM25 PE=1 SV=2                     | TRI25_HUMAN             | 71 kDa |      | 0.019014979 | 6.274442696 | 4.06    | 1.0432  | 0       | 14.904  | 11.86   | 7.83    |
| 511 | TRUE | Empty | E3 ubiquitin-protein ligase BRE1B OS=Homo sapiens GN=RNFB1 PE=1 SV=4                     | BRE1B_HUMAN             | ?      | TRUE | .248726999  | INF         | 0       | 0       | 0       | 0       | 0.84713 | 3.91    |
| 512 | TRUE | Empty | E3 ubiquitin-protein ligase HUWE1 OS=Homo sapiens GN=HUWE1 PE=1 SV=3                     | HUWE1_HUMAN             | ?      | TRUE | .014132239  | 6.610296779 | 11.052  | 0       | 0       | 20.866  | 21.178  | 31.013  |
| 513 | TRUE | Empty | E3 ubiquitin-protein ligase CHIP OS=Homo sapiens GN=STUB1 PE=1 SV=2                      | CHIP_HUMAN              | ?      |      | 0.136189297 | 2.3         | 0       | 3.1295  | 1.49    | 2.09    | 3.85    | 5.87    |
| 514 | TRUE | Empty | E3 ubiquitin-protein ligase LRSAM1 OS=Homo sapiens GN=LRSAM1 PE=1 SV=1                   | LRSAM1_HUMAN            | ?      |      | 0.118629825 | INF         | 0       | 0       | 0       | 2.09    | 2.14    | 0       |
| 515 | TRUE | Empty | E3 ubiquitin-protein ligase RNF114 OS=Homo sapiens GN=RNF114 PE=1 SV=1                   | RN114_HUMAN             | ?      |      | 0.182857041 | 0.2         | 0       | 4.1727  | 4.73    | 0.74522 | 0.84713 | 0       |
| 516 | TRUE | Empty | E3 ubiquitin-protein ligase RNF213 OS=Homo sapiens GN=RNF213 PE=1 SV=3                   | RN213_HUMAN             | ?      | TRUE | .373900966  | INF         | 0       | 0       | 0       | 0       | 0       | 2.94    |
| 517 | TRUE | Empty | E3 ubiquitin-protein ligase TRIM23 OS=Homo sapiens GN=TRIM23 PE=1 SV=1                   | TRI23_HUMAN             | ?      |      | 0.373900966 | INF         | 0       | 0       | 0       | 0       | 1.43    | 0       |
| 518 | TRUE | Empty | E3 ubiquitin-protein ligase TRIM33 OS=Homo sapiens GN=TRIM33 PE=1 SV=3                   | TRI33_HUMAN             | ?      | TRUE | .052971722  | 16          | 0       | 0       | 0.99746 | 4.13    | 2.14    | 8.81    |
| 519 | TRUE | Empty | E3 ubiquitin-protein ligase UBR4 OS=Homo sapiens GN=UBR4 PE=1 SV=1                       | UBR4_HUMAN              | ?      | TRUE | .015162985  | 19.00016041 | 0       | 0       | 0.99746 | 4.13    | 5.0828  | 9.78    |
| 520 | TRUE | Empty | E3 ubiquitin-protein ligase UBR5 OS=Homo sapiens GN=UBR5 PE=1 SV=2                       | UBR5_HUMAN              | ?      | TRUE | .311490087  | 3.2         | 0       | 1.0432  | 0       | 1.04    | 0       | 1.96    |
| 521 | TRUE | Empty | E3 UFM1-protein ligase 1 OS=Homo sapiens GN=UFL1 PE=1 SV=2                               | UFL1_HUMAN              | ?      | TRUE | .224916699  | 3.4         | 2.03    | 0       | 0       | 2.57    | 4.57    | 0.93978 |

|     |      |       |                                                                                                          |             |         |      |             |             |         |         |         |         |         |         |
|-----|------|-------|----------------------------------------------------------------------------------------------------------|-------------|---------|------|-------------|-------------|---------|---------|---------|---------|---------|---------|
| 522 | TRUE | Empty | Early endosome antigen 1 OS=Homo sapiens GN=EEA1 PE=1 SV=2                                               | EEA1_HUMAN  | 162 kDa |      | 0.502582938 | 0.6         | 0       | 4.1727  | 6.22    | 2.57    | 2.14    | 1.96    |
| 523 | TRUE | Empty | EH domain-containing protein 1 OS=Homo sapiens GN=EHD1 PE=1 SV=2                                         | EHD1_HUMAN  | 61 kDa  | TRUE | .175558359  | 2.5         | 4.06    | 0       | 1.49    | 5.17    | 2.14    | 7.83    |
| 524 | TRUE | Empty | EH domain-containing protein 4 OS=Homo sapiens GN=EHD4 PE=1 SV=1                                         | EHD4_HUMAN  | 61 kDa  | TRUE | .000315223  | 6.673651074 | 0       | 0.99746 | 0       | 2.57    | 2.14    | 1.96    |
| 525 | TRUE | Empty | EKC/KEOPS complex subunit LAGE3 OS=Homo sapiens GN=LAGE3 PE=1 SV=2                                       | LAGE3_HUMAN | 15 kDa  |      | 0.842158589 | 1.1         | 2.03    | 1.0432  | 0.99746 | 2.09    | 0       | 1.96    |
| 526 | TRUE | Empty | ELAV-like protein 1 OS=Homo sapiens GN=ELAVL1 PE=1 SV=2                                                  | ELAV1_HUMAN | ?       |      | 0.6617871   | 0.7         | 2.03    | 13.561  | 30.921  | 8.26    | 16.096  | 9.78    |
| 527 | TRUE | Empty | Electron transfer flavoprotein subunit alpha, mitochondrial OS=Homo sapiens GN=ETFA PE=1 SV=1            | ETFA_HUMAN  | ?       |      | 0.037559261 | 1.926866259 | 6.631   | 13.561  | 5.47    | 16.395  | 15.248  | 18.796  |
| 528 | TRUE | Empty | Electron transfer flavoprotein subunit beta OS=Homo sapiens GN=ETFB PE=1 SV=3                            | ETFB_HUMAN  | ?       |      | 0.003475822 | 7.54793467  | 2.03    | 0       | 0       | 5.17    | 5.0828  | 5.87    |
| 529 | TRUE | Empty | Elongation factor 1-alpha 2 OS=Homo sapiens GN=EEF1A2 PE=1 SV=1                                          | EF1A2_HUMAN | 50 kDa  | TRUE | .199860117  | 1.6         | 187.88  | 134.57  | 55.858  | 274.24  | 153.33  | 191.72  |
| 530 | TRUE | Empty | Elongation factor 1-beta OS=Homo sapiens GN=EEF1B2 PE=1 SV=3                                             | EF1B_HUMAN  | 25 kDa  | TRUE | .830889948  | 0.9         | 15.472  | 9.86    | 14.962  | 17.14   | 9.85    | 11.277  |
| 531 | TRUE | Empty | Elongation factor 1-delta OS=Homo sapiens GN=EEF1D PE=1 SV=5                                             | EF1D_HUMAN  | ?       | TRUE | .028919631  | 0.677815631 | 44.206  | 56.331  | 58.85   | 32.044  | 35.58   | 40.411  |
| 532 | TRUE | Empty | Elongation factor 1-gamma OS=Homo sapiens GN=EEF1G PE=1 SV=3                                             | EF1G_HUMAN  | ?       |      | 0.009524998 | 2.404486135 | 22.103  | 8.54    | 13.964  | 34.28   | 33.038  | 39.471  |
| 533 | TRUE | Empty | Elongation factor 2 OS=Homo sapiens GN=EEF2 PE=1 SV=4                                                    | EF2_HUMAN   | 95 kDa  | TRUE | .106392674  | 2.1         | 128.2   | 33.382  | 31.919  | 150.53  | 137.24  | 114.65  |
| 534 | TRUE | Empty | Elongation factor G, mitochondrial OS=Homo sapiens GN=GFM1 PE=1 SV=2                                     | EFGM_HUMAN  | ?       | TRUE | .373900966  | INF         | 0       | 0       | 0       | 1.04    | 0       | 0       |
| 535 | TRUE | Empty | Elongation factor Ts, mitochondrial OS=Homo sapiens GN=TSFM PE=1 SV=2                                    | EFTS_HUMAN  | ?       | TRUE | .090036366  | INF         | 0       | 0       | 0       | 4.13    | 0.84713 | 1.96    |
| 536 | TRUE | Empty | Elongation factor Tu, mitochondrial OS=Homo sapiens GN=TUFM PE=1 SV=2                                    | EFTU_HUMAN  | 50 kDa  |      | 0.32944426  | 2           | 15.472  | 2.0863  | 0       | 17.14   | 9.85    | 9.78    |
| 537 | TRUE | Empty | Endonuclease G, mitochondrial OS=Homo sapiens GN=ENDOG PE=1 SV=4                                         | NUCG_HUMAN  | 33 kDa  | TRUE | .475552494  | 2.5         | 0       | 1.0432  | 0.99746 | 0       | 4.57    | 0.93978 |
| 538 | TRUE | Empty | Endophilin-B2 OS=Homo sapiens GN=SH3GLB2 PE=1 SV=1                                                       | SHLB2_HUMAN | ?       |      | 0.817889465 | 1.1         | 2.03    | 14.604  | 10.972  | 14.904  | 7.42    | 8.81    |
| 539 | TRUE | Empty | Endoplasmic reticulum mannosyl-oligosaccharide 1,2-alpha-mannosidase OS=Homo sapiens GN=MAN1B1 PE=1 SV=2 | MA1B1_HUMAN | 80 kDa  |      | 0.119086248 | INF         | 0       | 0       | 0       | 2.57    | 0       | 1.96    |
| 540 | TRUE | Empty | Endoplasmic reticulum resident protein 29 OS=Homo sapiens GN=ERP29 PE=1 SV=4                             | ERP29_HUMAN | ?       | TRUE | .268333783  | 1.7         | 2.03    | 14.604  | 9.46    | 10.433  | 13.554  | 22.555  |
| 541 | TRUE | Empty | Endoplasmic reticulum resident protein 44 OS=Homo sapiens GN=ERP44 PE=1 SV=1                             | ERP44_HUMAN | 47 kDa  |      | 0.139470421 | 3.1         | 4.06    | 0       | 0.99746 | 7.22    | 2.14    | 6.85    |
| 542 | TRUE | Empty | Endoplasmin OS=Homo sapiens GN=HSP90B1 PE=1 SV=1                                                         | ENPL_HUMAN  | 92 kDa  | TRUE | .078555915  | 3.9         | 39.786  | 0       | 4.73    | 84.955  | 38.968  | 51.688  |
| 543 | TRUE | Empty | Enhancer of mRNA-decapping protein 3 OS=Homo sapiens GN=EDC3 PE=1 SV=1                                   | EDC3_HUMAN  | 56 kDa  |      | 0.003651919 | 4.134982856 | 0.99746 | 0       | 0       | 1.04    | 1.43    | 0.93978 |
| 544 | TRUE | Empty | Enhancer of mRNA-decapping protein 4 OS=Homo sapiens GN=EDC4 PE=1 SV=1                                   | EDC4_HUMAN  | ?       |      | 0.023060505 | 6.578428268 | 2.03    | 0       | 0       | 3.61    | 4.57    | 6.85    |
| 545 | TRUE | Empty | Enolase-phosphatase E1 OS=Homo sapiens GN=ENOPH1 PE=1 SV=1                                               | ENOPH_HUMAN | ?       |      | 0.46135138  | 2.5         | 0       | 1.0432  | 0       | 0.74522 | 0       | 1.96    |
| 546 | TRUE | Empty | Enoyl-CoA delta isomerase 1, mitochondrial OS=Homo sapiens GN=ECI1 PE=1 SV=1                             | ECI1_HUMAN  | ?       | TRUE | .227514196  | 1.4         | 4.06    | 6.259   | 5.47    | 8.74    | 5.0828  | 9.78    |
| 547 | TRUE | Empty | Enoyl-CoA hydratase, mitochondrial OS=Homo sapiens GN=ECHS1 PE=1 SV=4                                    | ECHM_HUMAN  | 31 kDa  | TRUE | .005653132  | 24.22994406 | 0       | 0.99746 | 0       | 9.78    | 5.0828  | 9.78    |
| 548 | TRUE | Empty | Ensconsin OS=Homo sapiens GN=MAP7 PE=1 SV=1                                                              | MAP7_HUMAN  | ?       | TRUE | .367591425  | 2.1         | 0       | 0       | 1.49    | 1.04    | 0.84713 | 1.96    |
| 549 | TRUE | Empty | Envoplakin OS=Homo sapiens GN=EVPL PE=1 SV=3                                                             | EVPL_HUMAN  | 232 kDa | TRUE | .251391811  | 0.3         | 0       | 6.259   | 6.22    | 2.57    | 1.43    | 0       |

|     |      |       |                                                                                                           |             |         |      |             |             |        |        |         |         |         |         |
|-----|------|-------|-----------------------------------------------------------------------------------------------------------|-------------|---------|------|-------------|-------------|--------|--------|---------|---------|---------|---------|
| 550 | TRUE | Empty | Epidermal growth factor receptor kinase substrate 8-like protein 1<br>OS=Homo sapiens GN=EPS8L1 PE=1 SV=3 | ES8L1_HUMAN | ?       |      | 0.373900966 | 0           | 0      | 0      | 1.49    | 0       | 0       | 0       |
| 551 | TRUE | Empty | Epidermal growth factor receptor kinase substrate 8-like protein 2<br>OS=Homo sapiens GN=EPS8L2 PE=1 SV=2 | ES8L2_HUMAN | ?       | TRUE | .373900966  | INF         | 0      | 0      | 0       | 0       | 2.14    | 0       |
| 552 | TRUE | Empty | Epidermal growth factor receptor substrate 15 OS=Homo sapiens<br>GN=EPS15 PE=1 SV=2                       | EPS15_HUMAN | ?       | TRUE | .147672906  | INF         | 0      | 0      | 0       | 0       | 1.43    | 0.93978 |
| 553 | TRUE | Empty | Epidermal growth factor receptor substrate 15-like 1 OS=Homo<br>sapiens GN=EPS15L1 PE=1 SV=1              | EP15R_HUMAN | ?       |      | 0.097636    | 2.3         | 0      | 2.0863 | 1.49    | 2.57    | 3.85    | 3.91    |
| 554 | TRUE | Empty | Epiplakin OS=Homo sapiens GN=EPPK1 PE=1 SV=2                                                              | EPIPL_HUMAN | 556 kDa | TRUE | .075079764  | 2.5         | 83.992 | 12.518 | 15.959  | 89.426  | 102.5   | 90.219  |
| 555 | TRUE | Empty | Epithelial cell adhesion molecule OS=Homo sapiens GN=EPCAM<br>PE=1 SV=2                                   | EPCAM_HUMAN | 35 kDa  |      | 0.817919934 | 1.4         | 0      | 1.0432 | 0       | 1.04    | 0       | 0       |
| 556 | TRUE | Empty | Epithelial splicing regulatory protein 1 OS=Homo sapiens<br>GN=ESRP1 PE=1 SV=2                            | ESRP1_HUMAN | ?       | TRUE | .497736304  | 1.5         | 0      | 3.1295 | 2.24    | 1.04    | 5.0828  | 2.94    |
| 557 | TRUE | Empty | Epithelial splicing regulatory protein 2 OS=Homo sapiens<br>GN=ESRP2 PE=1 SV=1                            | ESRP2_HUMAN | ?       | TRUE | .373900966  | INF         | 0      | 0      | 0       | 0       | 2.14    | 0       |
| 558 | TRUE | Empty | Epoxide hydrolase 1 OS=Homo sapiens GN=EPHX1 PE=1 SV=1                                                    | HYEP_HUMAN  | 53 kDa  |      | 0.03308882  | 3.48079121  | 0      | 0      | 0.99746 | 0.74522 | 0.84713 | 1.96    |
| 559 | TRUE | Empty | ER membrane protein complex subunit 1 OS=Homo sapiens<br>GN=EMC1 PE=1 SV=1                                | EMC1_HUMAN  | ?       |      | 0.060961291 | INF         | 0      | 0      | 0       | 0.74522 | 4.57    | 4.89    |
| 560 | TRUE | Empty | ER membrane protein complex subunit 2 OS=Homo sapiens<br>GN=EMC2 PE=1 SV=1                                | EMC2_HUMAN  | 35 kDa  |      | 0.119086248 | INF         | 0      | 0      | 0       | 2.57    | 0       | 1.96    |
| 561 | TRUE | Empty | Erlin-2 OS=Homo sapiens GN=ERLIN2 PE=1 SV=1                                                               | ERLN2_HUMAN | ?       | TRUE | .104344154  | 4.2         | 2.03   | 0      | 0       | 2.09    | 1.43    | 4.89    |
| 562 | TRUE | Empty | ERO1-like protein alpha OS=Homo sapiens GN=ERO1A PE=1 SV=2                                                | ERO1A_HUMAN | 54 kDa  | TRUE | .032392471  | 7.327792593 | 0      | 0      | 0.99746 | 2.09    | 3.85    | 0.93978 |
| 563 | TRUE | Empty | Erythrocyte band 7 integral membrane protein OS=Homo sapiens<br>GN=STOM PE=1 SV=3                         | STOM_HUMAN  | ?       |      | 0.007186925 | 5.719427639 | 2.03   | 3.1295 | 0.99746 | 15.65   | 9.85    | 11.277  |
| 564 | TRUE | Empty | ES1 protein homolog, mitochondrial OS=Homo sapiens<br>GN=C21orf33 PE=1 SV=3                               | ES1_HUMAN   | ?       |      | 0.254431521 | 0.3         | 0      | 4.1727 | 4.73    | 0.74522 | 0       | 1.96    |
| 565 | TRUE | Empty | Estradiol 17-beta-dehydrogenase 8 OS=Homo sapiens<br>GN=HSD17B8 PE=1 SV=2                                 | DHB8_HUMAN  | 27 kDa  |      | 0.373900966 | INF         | 0      | 0      | 0       | 1.04    | 0       | 0       |
| 566 | TRUE | Empty | Ethanolamine-phosphate cytidyltransferase OS=Homo sapiens<br>GN=PCYT2 PE=1 SV=1                           | PCY2_HUMAN  | ?       |      | 0.373900966 | INF         | 0      | 0      | 0       | 0       | 1.43    | 0       |
| 567 | TRUE | Empty | Eukaryotic initiation factor 4A-I OS=Homo sapiens GN=EIF4A1<br>PE=1 SV=1                                  | IF4A1_HUMAN | ?       | TRUE | .043439178  | 2.619032565 | 37.575 | 9.86   | 9.46    | 42.477  | 47.44   | 59.206  |
| 568 | TRUE | Empty | Eukaryotic initiation factor 4A-III OS=Homo sapiens GN=EIF4A3<br>PE=1 SV=4                                | IF4A3_HUMAN | 47 kDa  | TRUE | .138340583  | 1.6         | 6.631  | 5.59   | 1.49    | 7.22    | 7.42    | 6.85    |
| 569 | TRUE | Empty | Eukaryotic peptide chain release factor GTP-binding subunit<br>ERF3A OS=Homo sapiens GN=GSPT1 PE=1 SV=1   | ERF3A_HUMAN | ?       | TRUE | .554356598  | 2.1         | 0      | 0      | 5.47    | 8.26    | 3.85    | 0       |
| 570 | TRUE | Empty | Eukaryotic peptide chain release factor subunit 1 OS=Homo<br>sapiens GN=ETF1 PE=1 SV=3                    | ERF1_HUMAN  | ?       | TRUE | .007195192  | 4.987713391 | 0      | 2.0863 | 2.24    | 6.707   | 10.166  | 8.81    |
| 571 | TRUE | Empty | Eukaryotic translation elongation factor 1 epsilon-1 OS=Homo<br>sapiens GN=EEF1E1 PE=1 SV=1               | MCA3_HUMAN  | ?       |      | 0.015910638 | 0.179725665 | 2.03   | 4.1727 | 2.24    | 0.74522 | 0       | 0.93978 |
| 572 | TRUE | Empty | Eukaryotic translation initiation factor 1b OS=Homo sapiens<br>GN=EIF1B PE=1 SV=2                         | EIF1B_HUMAN | 13 kDa  | TRUE | .074940238  | 4.2         | 0      | 0      | 0.99746 | 1.04    | 0.84713 | 1.96    |
| 573 | TRUE | Empty | Eukaryotic translation initiation factor 2 subunit 1 OS=Homo<br>sapiens GN=EIF2S1 PE=1 SV=3               | IF2A_HUMAN  | 36 kDa  |      | 0.164168852 | 1.8         | 13.262 | 2.0863 | 7.97    | 12.669  | 11.86   | 17.856  |
| 574 | TRUE | Empty | Eukaryotic translation initiation factor 2 subunit 2 OS=Homo<br>sapiens GN=EIF2S2 PE=1 SV=2               | IF2B_HUMAN  | 38 kDa  |      | 0.359102554 | 2           | 0      | 1.0432 | 1.49    | 0.74522 | 3.85    | 1.96    |
| 575 | TRUE | Empty | Eukaryotic translation initiation factor 2 subunit 3 OS=Homo<br>sapiens GN=EIF2S3 PE=1 SV=3               | IF2G_HUMAN  | 51 kDa  |      | 0.550446381 | 1.3         | 2.03   | 3.1295 | 8.71    | 5.65    | 5.99    | 7.83    |
| 576 | TRUE | Empty | Eukaryotic translation initiation factor 2A OS=Homo sapiens<br>GN=EIF2A PE=1 SV=3                         | EIF2A_HUMAN | ?       |      | 0.146055018 | 3.4         | 0      | 0      | 0.99746 | 0.74522 | 1.43    | 0.93978 |

|     |      |       |                                                                                                       |                  |         |      |             |             |         |         |         |         |         |         |
|-----|------|-------|-------------------------------------------------------------------------------------------------------|------------------|---------|------|-------------|-------------|---------|---------|---------|---------|---------|---------|
| 577 | TRUE | Empty | Eukaryotic translation initiation factor 3 subunit A OS=Homo sapiens GN=EIF3A PE=1 SV=1               | EIF3A_HUMAN      | ?       | TRUE | .053455521  | 8.9         | 2.03    | 1.0432  | 0       | 4.13    | 15.248  | 9.78    |
| 578 | TRUE | Empty | Eukaryotic translation initiation factor 3 subunit B OS=Homo sapiens GN=EIF3B PE=1 SV=3               | EIF3B_HUMAN      | ?       | TRUE | .148107419  | 2.5         | 13.262  | 1.0432  | 1.49    | 9.78    | 13.554  | 16.916  |
| 579 | TRUE | Empty | Eukaryotic translation initiation factor 3 subunit C-like protein OS=Homo sapiens GN=EIF3CL PE=3 SV=1 | EIFCL_HUMAN (+1) | 105 kDa | TRUE | .174870512  | 2.7         | 6.631   | 0       | 0       | 5.65    | 5.99    | 6.85    |
| 580 | TRUE | Empty | Eukaryotic translation initiation factor 3 subunit D OS=Homo sapiens GN=EIF3D PE=1 SV=1               | EIF3D_HUMAN      | ?       |      | 0.115134731 | 3.8         | 0       | 1.0432  | 3.98    | 3.61    | 5.0828  | 10.338  |
| 581 | TRUE | Empty | Eukaryotic translation initiation factor 3 subunit E OS=Homo sapiens GN=EIF3E PE=1 SV=1               | EIF3E_HUMAN      | 52 kDa  |      | 0.140004642 | 5.8         | 2.03    | 1.0432  | 0       | 5.17    | 1.43    | 11.277  |
| 582 | TRUE | Empty | Eukaryotic translation initiation factor 3 subunit F OS=Homo sapiens GN=EIF3F PE=1 SV=1               | EIF3F_HUMAN      | 38 kDa  |      | 0.045615209 | 6.267657527 | 0       | 0       | 3.98    | 10.433  | 4.57    | 10.338  |
| 583 | TRUE | Empty | Eukaryotic translation initiation factor 3 subunit G OS=Homo sapiens GN=EIF3G PE=1 SV=2               | EIF3G_HUMAN      | 36 kDa  | TRUE | .366763367  | 0.5         | 0       | 6.259   | 4.73    | 1.04    | 0.84713 | 2.94    |
| 584 | TRUE | Empty | Eukaryotic translation initiation factor 3 subunit H OS=Homo sapiens GN=EIF3H PE=1 SV=1               | EIF3H_HUMAN      | 40 kDa  |      | 0.507804467 | 2.4         | 0       | 1.0432  | 0.99746 | 0.74522 | 4.57    | 0       |
| 585 | TRUE | Empty | Eukaryotic translation initiation factor 3 subunit I OS=Homo sapiens GN=EIF3I PE=1 SV=1               | EIF3I_HUMAN      | 37 kDa  | TRUE | .193912178  | 5.7         | 0       | 2.0863  | 1.49    | 15.65   | 5.99    | 1.96    |
| 586 | TRUE | Empty | Eukaryotic translation initiation factor 3 subunit L OS=Homo sapiens GN=EIF3L PE=1 SV=1               | EIF3L_HUMAN      | ?       |      | 0.00606701  | 13.64435667 | 0       | 0.99746 | 0       | 2.09    | 5.99    | 4.89    |
| 587 | TRUE | Empty | Eukaryotic translation initiation factor 3 subunit M OS=Homo sapiens GN=EIF3M PE=1 SV=1               | EIF3M_HUMAN      | ?       |      | 0.117185082 | INF         | 0       | 0       | 0       | 0       | 2.14    | 2.94    |
| 588 | TRUE | Empty | Eukaryotic translation initiation factor 4 gamma 1 OS=Homo sapiens GN=EIF4G1 PE=1 SV=4                | IF4G1_HUMAN      | ?       | TRUE | 0.01782156  | 5.230113219 | 8.13    | 0       | 0       | 13.414  | 17.79   | 15.037  |
| 589 | TRUE | Empty | Eukaryotic translation initiation factor 4 gamma 2 OS=Homo sapiens GN=EIF4G2 PE=1 SV=1                | IF4G2_HUMAN      | ?       | TRUE | .615399499  | 1.4         | 6.631   | 1.0432  | 0.99746 | 2.09    | 3.85    | 5.87    |
| 590 | TRUE | Empty | Eukaryotic translation initiation factor 4B OS=Homo sapiens GN=EIF4B PE=1 SV=2                        | IF4B_HUMAN       | ?       | TRUE | .065015792  | 0.2         | 6.631   | 19.82   | 11.969  | 2.09    | 2.14    | 3.91    |
| 591 | TRUE | Empty | Eukaryotic translation initiation factor 4H OS=Homo sapiens GN=EIF4H PE=1 SV=5                        | IF4H_HUMAN       | ?       | TRUE | .615576737  | 0.7         | 0       | 7.22    | 4.73    | 1.04    | 4.57    | 2.94    |
| 592 | TRUE | Empty | Eukaryotic translation initiation factor 5 OS=Homo sapiens GN=EIF5 PE=1 SV=2                          | IF5_HUMAN        | 49 kDa  | TRUE | .056487833  | 2.8         | 6.631   | 1.0432  | 1.49    | 11.178  | 9.85    | 6.85    |
| 593 | TRUE | Empty | Eukaryotic translation initiation factor 5A-1 OS=Homo sapiens GN=EIF5A PE=1 SV=2                      | IF5A1_HUMAN      | ?       | TRUE | .118035309  | 0.7         | 26.524  | 31.295  | 16.957  | 16.395  | 17.79   | 15.037  |
| 594 | TRUE | Empty | Eukaryotic translation initiation factor 5B OS=Homo sapiens GN=EIF5B PE=1 SV=4                        | IF2P_HUMAN       | 139 kDa |      | 0.044590634 | 4.488576668 | 0       | 1.0432  | 2.24    | 3.61    | 5.99    | 8.81    |
| 595 | TRUE | Empty | Eukaryotic translation initiation factor 6 OS=Homo sapiens GN=EIF6 PE=1 SV=1                          | IF6_HUMAN        | ?       |      | 0.66629989  | 0.7         | 0       | 29.209  | 7.97    | 8.26    | 7.42    | 8.81    |
| 596 | TRUE | Empty | Exosome complex component MTR3 OS=Homo sapiens GN=EXOSC6 PE=1 SV=1                                    | EXOS6_HUMAN      | 28 kDa  |      | 0.528254655 | 0.3         | 0       | 0       | 2.24    | 0       | 0.84713 | 0       |
| 597 | TRUE | Empty | Exosome complex component RRP4 OS=Homo sapiens GN=EXOSC2 PE=1 SV=2                                    | EXOS2_HUMAN      | ?       |      | 0.791076242 | 1.3         | 0       | 1.0432  | 2.24    | 0.74522 | 3.85    | 0.93978 |
| 598 | TRUE | Empty | Exosome complex component RRP45 OS=Homo sapiens GN=EXOSC9 PE=1 SV=3                                   | EXOS9_HUMAN      | ?       | TRUE | 0.44708438  | 0.3         | 0       | 1.0432  | 3.98    | 0       | 1.43    | 0       |
| 599 | TRUE | Empty | Exportin-1 OS=Homo sapiens GN=XPO1 PE=1 SV=1                                                          | XPO1_HUMAN       | 123 kDa | TRUE | .217545426  | 2.5         | 26.524  | 0       | 0       | 21.611  | 21.178  | 22.555  |
| 600 | TRUE | Empty | Exportin-2 OS=Homo sapiens GN=CSE1L PE=1 SV=3                                                         | XPO2_HUMAN       | ?       |      | 0.072845407 | 3.4         | 30.944  | 1.0432  | 0.99746 | 44.713  | 29.65   | 37.591  |
| 601 | TRUE | Empty | Exportin-5 OS=Homo sapiens GN=XPO5 PE=1 SV=1                                                          | XPO5_HUMAN       | 136 kDa | TRUE | .062200909  | 10          | 2.03    | 0       | 0       | 4.13    | 12.707  | 5.87    |
| 602 | TRUE | Empty | Exportin-7 OS=Homo sapiens GN=XPO7 PE=1 SV=3                                                          | XPO7_HUMAN       | 124 kDa |      | 0.002281953 | 6.766587131 | 0.99746 | 0       | 0       | 2.57    | 1.43    | 2.94    |
| 603 | TRUE | Empty | Exportin-T OS=Homo sapiens GN=XPOT PE=1 SV=2                                                          | XPOT_HUMAN       | 110 kDa |      | 0.033302108 | 4.818078994 | 4.06    | 0       | 0       | 5.65    | 7.42    | 8.81    |
| 604 | TRUE | Empty | Extended synaptotagmin-1 OS=Homo sapiens GN=ESYT1 PE=1 SV=1                                           | ESYT1_HUMAN      | ?       |      | 0.117655015 | 3.1         | 11.052  | 0       | 0       | 10.433  | 10.166  | 13.157  |
| 605 | TRUE | Empty | Extended synaptotagmin-2 OS=Homo sapiens GN=ESYT2 PE=1 SV=1                                           | ESYT2_HUMAN      | ?       |      | 0.373900966 | INF         | 0       | 0       | 0       | 0       | 0       | 1.96    |

|     |      |       |                                                                             |             |         |      |             |             |         |         |         |         |         |         |
|-----|------|-------|-----------------------------------------------------------------------------|-------------|---------|------|-------------|-------------|---------|---------|---------|---------|---------|---------|
| 606 | TRUE | Empty | Extracellular sulfatase Sulf-2 OS=Homo sapiens GN=SULF2 PE=1 SV=1           | SULF2_HUMAN | ?       |      | 0.117667821 | INF         | 0       | 0       | 0       | 0.74522 | 3.85    | 0.93978 |
| 607 | TRUE | Empty | Ezrin OS=Homo sapiens GN=EZR PE=1 SV=4                                      | EZRI_HUMAN  | 69 kDa  | TRUE | .741568903  | 1.1         | 35.365  | 14.604  | 20.947  | 21.611  | 27.108  | 29.133  |
| 608 | TRUE | Empty | FACT complex subunit SPT16 OS=Homo sapiens GN=SUPT16H PE=1 SV=1             | SP16H_HUMAN | 120 kDa |      | 0.00262192  | 17.27778558 | 0.99746 | 0       | 0       | 7.22    | 5.0828  | 4.89    |
| 609 | TRUE | Empty | FACT complex subunit SSRP1 OS=Homo sapiens GN=SSRP1 PE=1 SV=1               | SSRP1_HUMAN | 81 kDa  | TRUE | .709010335  | 1.4         | 0       | 0       | 5.47    | 2.57    | 1.43    | 4.89    |
| 610 | TRUE | Empty | F-actin-capping protein subunit alpha-1 OS=Homo sapiens GN=CAPZA1 PE=1 SV=3 | CAZA1_HUMAN | 33 kDa  | TRUE | .283620737  | 0.6         | 8.13    | 23.993  | 30.921  | 10.433  | 11.013  | 16.916  |
| 611 | TRUE | Empty | F-actin-capping protein subunit alpha-2 OS=Homo sapiens GN=CAPZA2 PE=1 SV=3 | CAZA2_HUMAN | ?       | TRUE | 0.40536834  | 0.8         | 6.631   | 11.475  | 15.959  | 6.707   | 7.42    | 11.277  |
| 612 | TRUE | Empty | F-actin-capping protein subunit beta OS=Homo sapiens GN=CAPZB PE=1 SV=4     | CAPZB_HUMAN | ?       |      | 0.75526219  | 1.2         | 4.06    | 7.22    | 20.947  | 13.414  | 15.248  | 9.78    |
| 613 | TRUE | Empty | Far upstream element-binding protein 1 OS=Homo sapiens GN=FUBP1 PE=1 SV=3   | FUBP1_HUMAN | ?       | TRUE | .333799196  | 0.7         | 15.472  | 32.338  | 41.893  | 18.63   | 17.79   | 26.314  |
| 614 | TRUE | Empty | Far upstream element-binding protein 2 OS=Homo sapiens GN=KHSRP PE=1 SV=4   | FUBP2_HUMAN | 73 kDa  | TRUE | .036955802  | 0.574790603 | 26.524  | 35.468  | 35.908  | 15.65   | 15.248  | 25.374  |
| 615 | TRUE | Empty | Far upstream element-binding protein 3 OS=Homo sapiens GN=FUBP3 PE=1 SV=2   | FUBP3_HUMAN | ?       | TRUE | .098930349  | 0.7         | 11.052  | 18.777  | 13.964  | 9.78    | 10.166  | 9.78    |
| 616 | TRUE | Empty | Farnesyl pyrophosphate synthase OS=Homo sapiens GN=FDPS PE=1 SV=4           | FPPS_HUMAN  | ?       |      | 0.00049079  | 12.59068033 | 0.99746 | 0       | 0       | 4.13    | 3.85    | 4.89    |
| 617 | TRUE | Empty | Fascin OS=Homo sapiens GN=FSCN1 PE=1 SV=3                                   | FSCN1_HUMAN | 55 kDa  |      | 0.142831189 | 1.6         | 2.03    | 1.0432  | 0.99746 | 2.57    | 2.14    | 1.96    |
| 618 | TRUE | Empty | Fatty acid synthase OS=Homo sapiens GN=FASN PE=1 SV=3                       | FAS_HUMAN   | 273 kDa | TRUE | .494590846  | 1.7         | 291.76  | 7.22    | 8.71    | 176.62  | 176.2   | 168.22  |
| 619 | TRUE | Empty | Fatty acid-binding protein, epidermal OS=Homo sapiens GN=FABP5 PE=1 SV=3    | FABP5_HUMAN | 15 kDa  | TRUE | .867045185  | 1.1         | 2.03    | 3.1295  | 2.24    | 3.61    | 4.57    | 0.93978 |
| 620 | TRUE | Empty | F-box only protein 22 OS=Homo sapiens GN=FBXO22 PE=1 SV=1                   | FBX22_HUMAN | ?       |      | 0.080922552 | INF         | 0       | 0       | 0       | 0.74522 | 1.43    | 3.91    |
| 621 | TRUE | Empty | Fermitin family homolog 2 OS=Homo sapiens GN=FERMT2 PE=1 SV=1               | FERM2_HUMAN | ?       |      | 0.009521936 | 4.227868787 | 0       | 0.99746 | 0       | 1.04    | 0.84713 | 1.96    |
| 622 | TRUE | Empty | Filamin-A OS=Homo sapiens GN=FLNA PE=1 SV=4                                 | FLNA_HUMAN  | ?       | TRUE | .108753105  | 1.3         | 183.46  | 125.18  | 187.52  | 190.03  | 219.41  | 237.77  |
| 623 | TRUE | Empty | Filamin-B OS=Homo sapiens GN=FLNB PE=1 SV=2                                 | FLNB_HUMAN  | ?       | TRUE | .216535841  | 0.6         | 64.099  | 140.83  | 158.6   | 68.56   | 87.255  | 78.002  |
| 624 | TRUE | Empty | FK506-binding protein 15 OS=Homo sapiens GN=FKBP15 PE=1 SV=2                | FKB15_HUMAN | ?       | TRUE | .005904554  | 5.839042271 | 0       | 1.0432  | 0.99746 | 2.09    | 4.57    | 4.89    |
| 625 | TRUE | Empty | Flavin reductase (NADPH) OS=Homo sapiens GN=BLVRB PE=1 SV=3                 | BLVRB_HUMAN | 22 kDa  |      | 0.121549451 | 0.4         | 11.052  | 38.597  | 35.908  | 6.707   | 12.707  | 13.157  |
| 626 | TRUE | Empty | Flotillin-1 OS=Homo sapiens GN=FLOT1 PE=1 SV=3                              | FLOT1_HUMAN | ?       | TRUE | .030400164  | 5.179375614 | 0.99746 | 0       | 0       | 0.74522 | 2.14    | 1.96    |
| 627 | TRUE | Empty | Four and a half LIM domains protein 2 OS=Homo sapiens GN=FHL2 PE=1 SV=3     | FHL2_HUMAN  | ?       |      | 0.137246924 | 3.1         | 0       | 1.0432  | 0       | 1.04    | 0.84713 | 0.93978 |
| 628 | TRUE | Empty | Fructose-1,6-bisphosphatase 1 OS=Homo sapiens GN=FBP1 PE=1 SV=5             | F16P1_HUMAN | 37 kDa  | TRUE | .169233844  | 0.5         | 59.679  | 160.65  | 98.748  | 44.713  | 72.854  | 46.989  |
| 629 | TRUE | Empty | Fructose-2,6-bisphosphatase TIGAR OS=Homo sapiens GN=TIGAR PE=1 SV=1        | TIGAR_HUMAN | 30 kDa  |      | 0.001127235 | 10.05213242 | 0       | 0.99746 | 0       | 3.61    | 2.14    | 3.91    |
| 630 | TRUE | Empty | Fructose-bisphosphate aldolase A OS=Homo sapiens GN=ALDOA PE=1 SV=2         | ALDOA_HUMAN | ?       | TRUE | .109056292  | 0.7         | 181.25  | 275.4   | 220.44  | 169.16  | 182.98  | 135.33  |
| 631 | TRUE | Empty | Fructose-bisphosphate aldolase C OS=Homo sapiens GN=ALDOC PE=1 SV=2         | ALDOC_HUMAN | 39 kDa  | TRUE | .492102883  | 0.6         | 11.052  | 3.1295  | 3.98    | 6.707   | 0.84713 | 3.91    |
| 632 | TRUE | Empty | Fumarate hydratase, mitochondrial OS=Homo sapiens GN=FH PE=1 SV=3           | FUMH_HUMAN  | ?       | TRUE | .058785769  | 5           | 0       | 3.1295  | 0.99746 | 3.61    | 10.166  | 6.85    |
| 633 | TRUE | Empty | Fumarylacetoacetase OS=Homo sapiens GN=FAH PE=1 SV=2                        | FAAA_HUMAN  | ?       |      | 0.88838267  | 0.8         | 0       | 0       | 3.98    | 0.74522 | 1.43    | 0.93978 |
| 634 | TRUE | Empty | G1/S-specific cyclin-D1 OS=Homo sapiens GN=CCND1 PE=1 SV=1                  | CCND1_HUMAN | 34 kDa  |      | 0.080922552 | INF         | 0       | 0       | 0       | 0.74522 | 1.43    | 3.91    |

|     |      |       |                                                                                                     |                  |         |      |             |             |        |        |         |         |         |         |
|-----|------|-------|-----------------------------------------------------------------------------------------------------|------------------|---------|------|-------------|-------------|--------|--------|---------|---------|---------|---------|
| 635 | TRUE | Empty | Galactokinase OS=Homo sapiens GN=GALK1 PE=1 SV=1                                                    | GALK1_HUMAN      | ?       | TRUE | .302113716  | 1.5         | 4.06   | 3.1295 | 6.22    | 5.65    | 5.99    | 11.277  |
| 636 | TRUE | Empty | GALC_HUMAN-DECOY                                                                                    | GALC_HUMAN-DECOY | ?       |      | 0.373900966 | 0           | 0      | 0      | 1.49    | 0       | 0       | 0       |
| 637 | TRUE | Empty | Galectin-1 OS=Homo sapiens GN=LGALS1 PE=1 SV=2                                                      | LEG1_HUMAN       | 15 kDa  |      | 0.925381927 | 1.1         | 0      | 19.82  | 5.47    | 8.26    | 10.166  | 8.81    |
| 638 | TRUE | Empty | Galectin-3 OS=Homo sapiens GN=LGALS3 PE=1 SV=5                                                      | LEG3_HUMAN       | 26 kDa  |      | 0.102937276 | 0.4         | 19.893 | 56.331 | 62.84   | 8.74    | 16.943  | 24.434  |
| 639 | TRUE | Empty | Gamma-glutamyl hydrolase OS=Homo sapiens GN=GGH PE=1 SV=2                                           | GGH_HUMAN        | 36 kDa  |      | 0.335302688 | 0.2         | 0      | 1.0432 | 4.73    | 0       | 0       | 0.93978 |
| 640 | TRUE | Empty | Gamma-glutamylcyclotransferase OS=Homo sapiens GN=GGCT PE=1 SV=1                                    | GGCT_HUMAN       | ?       |      | 0.148155676 | 2.1         | 0      | 3.1295 | 1.49    | 4.13    | 3.85    | 2.94    |
| 641 | TRUE | Empty | GDP-L-fucose synthase OS=Homo sapiens GN=TSTA3 PE=1 SV=1                                            | FCL_HUMAN        | 36 kDa  |      | 0.895738011 | 1.1         | 0      | 3.1295 | 3.98    | 2.57    | 1.43    | 3.91    |
| 642 | TRUE | Empty | GDP-mannose 4,6 dehydratase OS=Homo sapiens GN=GMDS PE=1 SV=1                                       | GMDS_HUMAN       | ?       | TRUE | .373900966  | 0           | 0      | 0      | 1.49    | 0       | 0       | 0       |
| 643 | TRUE | Empty | Gelsolin OS=Homo sapiens GN=GSLN PE=1 SV=1                                                          | GELS_HUMAN       | ?       | TRUE | .112291811  | 0.5         | 22.103 | 35.468 | 49.873  | 17.885  | 18.637  | 21.615  |
| 644 | TRUE | Empty | Gem-associated protein 5 OS=Homo sapiens GN=GEMIN5 PE=1 SV=3                                        | GEMI5_HUMAN      | 169 kDa | TRUE | .119086248  | INF         | 0      | 0      | 0       | 2.57    | 0       | 1.96    |
| 645 | TRUE | Empty | General transcription factor 3C polypeptide 3 OS=Homo sapiens GN=GTF3C3 PE=1 SV=1                   | TF3C3_HUMAN      | ?       |      | 0.231711402 | INF         | 0      | 0      | 0       | 0.74522 | 0       | 2.94    |
| 646 | TRUE | Empty | General transcription factor 3C polypeptide 4 OS=Homo sapiens GN=GTF3C4 PE=1 SV=2                   | TF3C4_HUMAN      | 92 kDa  |      | 0.071986351 | 5.9         | 0      | 0      | 0.99746 | 2.57    | 0.84713 | 2.94    |
| 647 | TRUE | Empty | General transcription factor II-I OS=Homo sapiens GN=GTF2I PE=1 SV=2                                | GTF2I_HUMAN      | ?       | TRUE | .828224327  | 1.2         | 11.052 | 0      | 1.49    | 6.707   | 0       | 9.78    |
| 648 | TRUE | Empty | General vesicular transport factor p115 OS=Homo sapiens GN=USO1 PE=1 SV=2                           | USO1_HUMAN       | ?       | TRUE | 0.49364667  | 1.6         | 2.03   | 0      | 0.99746 | 1.04    | 0.84713 | 2.94    |
| 649 | TRUE | Empty | Gephyrin OS=Homo sapiens GN=GPHN PE=1 SV=1                                                          | GEPH_HUMAN       | ?       | TRUE | .271397858  | 2.3         | 0      | 1.0432 | 1.49    | 0.74522 | 2.14    | 3.91    |
| 650 | TRUE | Empty | Gigaxonin OS=Homo sapiens GN=GAN PE=1 SV=1                                                          | GAN_HUMAN        | 68 kDa  |      | 0.013481328 | 7.907400307 | 0      | 1.0432 | 0       | 2.09    | 3.85    | 1.96    |
| 651 | TRUE | Empty | Glia maturation factor beta OS=Homo sapiens GN=GMFB PE=1 SV=2                                       | GMFB_HUMAN       | 17 kDa  | TRUE | .443532528  | 0.4         | 0      | 1.0432 | 2.24    | 0.74522 | 0       | 0.93978 |
| 652 | TRUE | Empty | Glucosamine 6-phosphate N-acetyltransferase OS=Homo sapiens GN=GNPNAT1 PE=1 SV=1                    | GNA1_HUMAN       | 21 kDa  |      | 0.009682446 | 5.793884152 | 0      | 2.0863 | 1.49    | 5.17    | 10.166  | 7.83    |
| 653 | TRUE | Empty | Glucosamine-6-phosphate isomerase 1 OS=Homo sapiens GN=GNPDA1 PE=1 SV=1                             | GNPI1_HUMAN      | ?       | TRUE | .456401571  | 1.6         | 0      | 2.0863 | 0.99746 | 1.04    | 2.14    | 0.93978 |
| 654 | TRUE | Empty | Glucose-6-phosphate 1-dehydrogenase OS=Homo sapiens GN=G6PD PE=1 SV=4                               | G6PD_HUMAN       | ?       |      | 0.003589052 | 2.393575591 | 24.314 | 25.036 | 18.952  | 57.382  | 60.994  | 45.11   |
| 655 | TRUE | Empty | Glucose-6-phosphate isomerase OS=Homo sapiens GN=GPI PE=1 SV=4                                      | G6PI_HUMAN       | ?       | TRUE | .549373894  | 0.8         | 81.782 | 34.425 | 74.809  | 63.344  | 62.688  | 28.194  |
| 656 | TRUE | Empty | Glucose-induced degradation protein 8 homolog OS=Homo sapiens GN=GID8 PE=1 SV=1                     | GID8_HUMAN       | 27 kDa  |      | 0.087092203 | 5.6         | 0      | 0      | 0.99746 | 2.09    | 1.43    | 0.93978 |
| 657 | TRUE | Empty | Glucosidase 2 subunit beta OS=Homo sapiens GN=PRKCSH PE=1 SV=2                                      | GLU2B_HUMAN      | ?       | TRUE | .563974417  | 1.4         | 15.472 | 1.0432 | 5.47    | 11.923  | 9.85    | 9.78    |
| 658 | TRUE | Empty | Glutamate dehydrogenase 1, mitochondrial OS=Homo sapiens GN=GLUD1 PE=1 SV=2                         | DHE3_HUMAN       | ?       | TRUE | .056327309  | INF         | 0      | 0      | 0       | 17.14   | 3.85    | 11.277  |
| 659 | TRUE | Empty | Glutamate dehydrogenase 2, mitochondrial OS=Homo sapiens GN=GLUD2 PE=1 SV=2                         | DHE4_HUMAN       | 61 kDa  | TRUE | .037604234  | 13.8209051  | 0      | 0      | 0.99746 | 3.61    | 2.14    | 7.83    |
| 660 | TRUE | Empty | Glutamate-rich WD repeat-containing protein 1 OS=Homo sapiens GN=GRWD1 PE=1 SV=1                    | GRWD1_HUMAN      | 49 kDa  |      | 0.993762925 | 1           | 2.03   | 2.0863 | 2.24    | 2.09    | 3.85    | 0.93978 |
| 661 | TRUE | Empty | Glutamine--fructose-6-phosphate aminotransferase [isomerizing] 1 OS=Homo sapiens GN=GFPT1 PE=1 SV=3 | GFPT1_HUMAN      | ?       | TRUE | 0.06066379  | 3.7         | 6.631  | 0      | 0       | 7.22    | 7.42    | 9.78    |
| 662 | TRUE | Empty | Glutamine--tRNA ligase OS=Homo sapiens GN=QARS PE=1 SV=1                                            | SYQ_HUMAN        | ?       | TRUE | .000708106  | 24.43436328 | 0      | 0      | 0.99746 | 8.74    | 6.71    | 9.78    |
| 663 | TRUE | Empty | Glutaredoxin-3 OS=Homo sapiens GN=GLRX3 PE=1 SV=2                                                   | GLRX3_HUMAN      | 37 kDa  |      | 0.029584164 | 2.615992063 | 4.06   | 1.0432 | 1.49    | 5.65    | 6.71    | 7.83    |
| 664 | TRUE | Empty | Glutathione reductase, mitochondrial OS=Homo sapiens GN=GSR PE=1 SV=2                               | GSHR_HUMAN       | ?       |      | 0.680743732 | 0.8         | 0      | 28.166 | 17.954  | 11.178  | 12.707  | 11.277  |

|     |      |       |                                                                                                           |                |        |      |             |             |         |         |         |         |         |         |
|-----|------|-------|-----------------------------------------------------------------------------------------------------------|----------------|--------|------|-------------|-------------|---------|---------|---------|---------|---------|---------|
| 665 | TRUE | Empty | Glutathione S-transferase kappa 1 OS=Homo sapiens GN=GSTK1<br>PE=1 SV=3                                   | GSTK1_HUMAN    | ?      |      | 0.000114504 | 5.077196078 | 0.99746 | 0       | 0       | 1.04    | 1.43    | 1.96    |
| 666 | TRUE | Empty | Glutathione S-transferase Mu 3 OS=Homo sapiens GN=GSTM3<br>PE=1 SV=3                                      | GSTM3_HUMAN    | 27 kDa | TRUE | 0.66798007  | 1.4         | 24.314  | 2.0863  | 1.49    | 11.923  | 12.707  | 14.097  |
| 667 | TRUE | Empty | Glutathione S-transferase omega-1 OS=Homo sapiens GN=GSTO1<br>PE=1 SV=2                                   | GSTO1_HUMAN    | ?      | TRUE | .567429604  | 0.7         | 2.03    | 11.475  | 22.942  | 5.65    | 8.13    | 11.277  |
| 668 | TRUE | Empty | Glutathione S-transferase theta-1 OS=Homo sapiens GN=GSTT1<br>PE=1 SV=4                                   | GSTT1_HUMAN    | ?      |      | 0.116315977 | 0           | 0       | 2.0863  | 1.49    | 0       | 0       | 0       |
| 669 | TRUE | Empty | Glutathione synthetase OS=Homo sapiens GN=GSS PE=1 SV=1                                                   | GSHB_HUMAN     | ?      |      | 0.065597725 | 0.4         | 6.631   | 9.86    | 13.964  | 2.57    | 5.99    | 3.91    |
| 670 | TRUE | Empty | Glyceraldehyde-3-phosphate dehydrogenase OS=Homo sapiens<br>GN=GAPDH PE=1 SV=3                            | G3P_HUMAN      | ?      | TRUE | .362040537  | 0.5         | 243.14  | 1 000.4 | 439.88  | 277.22  | 282.1   | 210.51  |
| 671 | TRUE | Empty | Glycerol-3-phosphate dehydrogenase 1-like protein OS=Homo<br>sapiens GN=GPD1L PE=1 SV=1                   | GPD1L_HUMAN    | 38 kDa | TRUE | .187802093  | 3.2         | 0       | 0       | 5.47    | 8.74    | 2.14    | 8.81    |
| 672 | TRUE | Empty | Glycerol-3-phosphate dehydrogenase, mitochondrial OS=Homo<br>sapiens GN=GPD2 PE=1 SV=3                    | GPDM_HUMAN     | ?      |      | 0.014880523 | 9.299142022 | 0       | 2.0863  | 0       | 6.707   | 4.57    | 8.81    |
| 673 | TRUE | Empty | Glycerophosphodiester phosphodiesterase domain-containing<br>protein 3 OS=Homo sapiens GN=GDPD3 PE=2 SV=3 | GDPD3_HUMAN    | ?      |      | 0.121391969 | INF         | 0       | 0       | 0       | 2.09    | 0       | 3.91    |
| 674 | TRUE | Empty | Glycine--tRNA ligase OS=Homo sapiens GN=GARS PE=1 SV=3                                                    | SYG_HUMAN      | 83 kDa | TRUE | .183523879  | 0.6         | 15.472  | 38.597  | 29.924  | 9.78    | 18.637  | 19.735  |
| 675 | TRUE | Empty | Glycogen phosphorylase, brain form OS=Homo sapiens GN=PYGB<br>PE=1 SV=5                                   | PYGB_HUMAN     | 97 kDa | TRUE | .007375351  | 4.946791833 | 4.06    | 3.1295  | 0.99746 | 13.414  | 11.013  | 17.856  |
| 676 | TRUE | Empty | Glycogenin-1 OS=Homo sapiens GN=GYG1 PE=1 SV=4                                                            | GLYG_HUMAN     | ?      |      | 0.352779877 | 0.6         | 4.06    | 7.22    | 5.47    | 0.74522 | 2.14    | 7.83    |
| 677 | TRUE | Empty | Glyoxalase domain-containing protein 4 OS=Homo sapiens<br>GN=GLOD4 PE=1 SV=1                              | GLOD4_HUMAN    | ?      |      | 0.173004776 | 2.8         | 0       | 7.22    | 6.22    | 8.74    | 9.85    | 22.555  |
| 678 | TRUE | Empty | Glyoxylate reductase/hydroxypyruvate reductase OS=Homo<br>sapiens GN=GRHPR PE=1 SV=1                      | GRHPR_HUMAN    | ?      | TRUE | .483720568  | 1.4         | 0       | 11.475  | 5.47    | 8.74    | 8.13    | 8.81    |
| 679 | TRUE | Empty | GMP synthase [glutamine-hydrolyzing] OS=Homo sapiens<br>GN=GMPS PE=1 SV=1                                 | GUAA_HUMAN     | ?      | TRUE | .084528058  | 9.4         | 0       | 1.0432  | 1.49    | 6.707   | 5.0828  | 16.916  |
| 680 | TRUE | Empty | GOGA4_HUMAN-DECOY                                                                                         | GOGA4_HUMAN-DE | ?      | TRUE | .243940672  | 0           | 4.06    | 1.0432  | 0       | 0       | 0       | 0       |
| 681 | TRUE | Empty | Golgi apparatus protein 1 OS=Homo sapiens GN=GLG1 PE=1 SV=2                                               | GSLG1_HUMAN    | ?      | TRUE | 0.10854527  | 5.9         | 2.03    | 0       | 0       | 2.09    | 2.14    | 7.83    |
| 682 | TRUE | Empty | Golgi phosphoprotein 3 OS=Homo sapiens GN=GOLPH3 PE=1 SV=1                                                | GOLP3_HUMAN    | 34 kDa | TRUE | .013822492  | 2.053311993 | 4.06    | 2.0863  | 3.98    | 8.74    | 6.71    | 6.85    |
| 683 | TRUE | Empty | Golgi reassembly-stacking protein 2 OS=Homo sapiens<br>GN=GORASP2 PE=1 SV=3                               | GORS2_HUMAN    | ?      |      | 0.736444178 | 0.9         | 8.13    | 3.1295  | 2.24    | 2.09    | 5.0828  | 4.89    |
| 684 | TRUE | Empty | Golgi resident protein GCP60 OS=Homo sapiens GN=ACBD3 PE=1<br>SV=4                                        | GCP60_HUMAN    | 61 kDa | TRUE | .178702406  | 4.8         | 0       | 0       | 0.99746 | 2.09    | 0.84713 | 0.93978 |
| 685 | TRUE | Empty | Golgin subfamily A member 3 OS=Homo sapiens GN=GOLGA3<br>PE=1 SV=2                                        | GOGA3_HUMAN    | ?      | TRUE | .491737711  | 0.6         | 0       | 2.0863  | 1.49    | 0.74522 | 0.84713 | 0.93978 |
| 686 | TRUE | Empty | Golgin subfamily A member 4 OS=Homo sapiens GN=GOLGA4<br>PE=1 SV=1                                        | GOGA4_HUMAN    | ?      | TRUE | .373900966  | 0           | 0       | 0       | 2.24    | 0       | 0       | 0       |
| 687 | TRUE | Empty | Grancalcin OS=Homo sapiens GN=GCA PE=1 SV=2                                                               | GRAN_HUMAN     | 24 kDa |      | 0.017663121 | 3.387905279 | 0.99746 | 0       | 0       | 0.74522 | 1.43    | 0.93978 |
| 688 | TRUE | Empty | G-rich sequence factor 1 OS=Homo sapiens GN=GRSF1 PE=1 SV=3                                               | GRSF1_HUMAN    | ?      |      | 0.001071009 | 8.465101357 | 0       | 0.99746 | 0       | 2.57    | 3.85    | 2.94    |
| 689 | TRUE | Empty | Growth factor receptor-bound protein 2 OS=Homo sapiens<br>GN=GRB2 PE=1 SV=1                               | GRB2_HUMAN     | ?      |      | 0.792670078 | 0.8         | 0       | 1.0432  | 2.24    | 1.04    | 0.84713 | 0.93978 |
| 690 | TRUE | Empty | GTPase NRas OS=Homo sapiens GN=NRAS PE=1 SV=1                                                             | RASN_HUMAN     | 21 kDa | TRUE | .731633154  | 0.7         | 0       | 1.0432  | 3.98    | 0       | 2.14    | 0.93978 |
| 691 | TRUE | Empty | GTPase-activating protein and VPS9 domain-containing protein 1<br>OS=Homo sapiens GN=GAPVD1 PE=1 SV=2     | GAPD1_HUMAN    | ?      |      | 0.02329226  | 12.87871193 | 0.99746 | 0       | 0       | 3.61    | 2.14    | 6.85    |
| 692 | TRUE | Empty | GTP-binding nuclear protein Ran OS=Homo sapiens GN=RAN PE=1<br>SV=3                                       | RAN_HUMAN      | 24 kDa |      | 0.209114757 | 1.2         | 30.944  | 41.727  | 35.908  | 48.439  | 38.968  | 40.411  |

|     |      |       |                                                                                                       |              |         |      |             |             |        |        |         |         |         |         |
|-----|------|-------|-------------------------------------------------------------------------------------------------------|--------------|---------|------|-------------|-------------|--------|--------|---------|---------|---------|---------|
| 693 | TRUE | Empty | GTP-binding protein Rheb OS=Homo sapiens GN=RHEB PE=1 SV=1                                            | RHEB_HUMAN   | 20 kDa  |      | 0.373900966 | INF         | 0      | 0      | 0       | 0       | 1.43    | 0       |
| 694 | TRUE | Empty | GTP-binding protein SAR1b OS=Homo sapiens GN=SAR1B PE=1 SV=1                                          | SAR1B_HUMAN  | 22 kDa  | TRUE | .408813086  | 1.7         | 2.03   | 0      | 3.98    | 1.04    | 4.57    | 4.89    |
| 695 | TRUE | Empty | Guanine nucleotide exchange factor VAV2 OS=Homo sapiens GN=VAV2 PE=1 SV=2                             | VAV2_HUMAN   | ?       |      | 0.355492035 | 7.7         | 0      | 0      | 0.99746 | 0       | 6.71    | 0.93978 |
| 696 | TRUE | Empty | Guanine nucleotide-binding protein G(I)/G(S)/G(T) subunit beta-1 OS=Homo sapiens GN=GNB1 PE=1 SV=3    | GNB1_HUMAN   | ?       | TRUE | .911579007  | 1.1         | 2.03   | 14.604 | 9.46    | 7.22    | 7.42    | 13.157  |
| 697 | TRUE | Empty | Guanine nucleotide-binding protein G(I)/G(S)/G(T) subunit beta-2 OS=Homo sapiens GN=GNB2 PE=1 SV=3    | GNB2_HUMAN   | ?       | TRUE | .866332962  | 0.9         | 2.03   | 16.691 | 7.97    | 6.707   | 8.13    | 9.78    |
| 698 | TRUE | Empty | Guanine nucleotide-binding protein G(k) subunit alpha OS=Homo sapiens GN=GNAI3 PE=1 SV=3              | GNAI3_HUMAN  | 41 kDa  | TRUE | 0.33908911  | 2.4         | 6.631  | 0      | 0.99746 | 11.178  | 2.14    | 4.89    |
| 699 | TRUE | Empty | Guanine nucleotide-binding protein G(s) subunit alpha isoforms XLas OS=Homo sapiens GN=GNAS PE=1 SV=2 | GNAS1_HUMAN  | ?       | TRUE | .009839231  | 7.420722843 | 0      | 0      | 1.49    | 5.17    | 5.0828  | 3.91    |
| 700 | TRUE | Empty | Guanine nucleotide-binding protein subunit alpha-13 OS=Homo sapiens GN=GNA13 PE=1 SV=2                | GNA13_HUMAN  | ?       | TRUE | .004654004  | 13.5328735  | 0      | 0      | 0.99746 | 4.13    | 3.85    | 5.87    |
| 701 | TRUE | Empty | Guanine nucleotide-binding protein subunit beta-2-like 1 OS=Homo sapiens GN=GNB2L1 PE=1 SV=3          | GNB2L1_HUMAN | 35 kDa  |      | 0.036981082 | 1.907841342 | 19.893 | 12.518 | 9.46    | 30.554  | 21.178  | 29.133  |
| 702 | TRUE | Empty | Guanine nucleotide-binding protein-like 1 OS=Homo sapiens GN=GNL1 PE=1 SV=2                           | GNL1_HUMAN   | ?       |      | 0.06853503  | INF         | 0      | 0      | 0       | 0.74522 | 2.14    | 0.93978 |
| 703 | TRUE | Empty | H/ACA ribonucleoprotein complex subunit 2 OS=Homo sapiens GN=NHP2 PE=1 SV=1                           | NHP2_HUMAN   | 17 kDa  |      | 0.200796519 | 0.5         | 4.06   | 10.432 | 5.47    | 3.61    | 1.43    | 5.87    |
| 704 | TRUE | Empty | H/ACA ribonucleoprotein complex subunit 3 OS=Homo sapiens GN=NOP10 PE=1 SV=1                          | NOP10_HUMAN  | 8 kDa   |      | 0.896631565 | 1.2         | 0      | 2.0863 | 0       | 0.74522 | 1.43    | 0       |
| 705 | TRUE | Empty | H/ACA ribonucleoprotein complex subunit 4 OS=Homo sapiens GN=DKC1 PE=1 SV=3                           | DKC1_HUMAN   | ?       |      | 0.428752659 | 1.3         | 4.06   | 2.0863 | 3.98    | 4.13    | 6.71    | 2.94    |
| 706 | TRUE | Empty | HD domain-containing protein 2 OS=Homo sapiens GN=HDDC2 PE=1 SV=1                                     | HDDC2_HUMAN  | ?       | TRUE | .231724225  | 0.1         | 0      | 2.0863 | 4.73    | 0       | 0.84713 | 0       |
| 707 | TRUE | Empty | HEAT repeat-containing protein 6 OS=Homo sapiens GN=HEATR6 PE=1 SV=1                                  | HEATR6_HUMAN | 129 kDa |      | 0.007928191 | 4.529039955 | 6.631  | 2.0863 | 0       | 11.923  | 14.401  | 13.157  |
| 708 | TRUE | Empty | Heat shock 70 kDa protein 14 OS=Homo sapiens GN=HSPA14 PE=1 SV=1                                      | HSPA14_HUMAN | 55 kDa  |      | 0.91179265  | 1.1         | 4.06   | 0      | 0       | 2.57    | 0.84713 | 1.96    |
| 709 | TRUE | Empty | Heat shock 70 kDa protein 18 OS=Homo sapiens GN=HSPA18 PE=1 SV=1                                      | HSPA18_HUMAN | 70 kDa  | TRUE | .052352551  | 0.4         | 156.93 | 332.77 | 270.31  | 118.49  | 117.75  | 98.677  |
| 710 | TRUE | Empty | Heat shock 70 kDa protein 4 OS=Homo sapiens GN=HSPA4 PE=1 SV=4                                        | HSPA4_HUMAN  | ?       | TRUE | .009111815  | 3.658037131 | 6.631  | 3.1295 | 4.73    | 14.159  | 22.873  | 16.916  |
| 711 | TRUE | Empty | Heat shock cognate 71 kDa protein OS=Homo sapiens GN=HSPA8 PE=1 SV=1                                  | HSPA8_HUMAN  | ?       | TRUE | .090292806  | 0.6         | 179.04 | 327.56 | 296.24  | 183.32  | 155.03  | 156.94  |
| 712 | TRUE | Empty | Heat shock factor-binding protein 1 OS=Homo sapiens GN=HSBP1 PE=1 SV=1                                | HSBP1_HUMAN  | 9 kDa   |      | 0.870026374 | 0.9         | 0      | 4.1727 | 10.972  | 5.65    | 2.14    | 5.87    |
| 713 | TRUE | Empty | Heat shock protein 105 kDa OS=Homo sapiens GN=HSPH1 PE=1 SV=1                                         | HSPH1_HUMAN  | ?       | TRUE | .004927414  | 5.901646305 | 2.03   | 5.59   | 1.49    | 18.63   | 22.873  | 14.097  |
| 714 | TRUE | Empty | Heat shock protein 75 kDa, mitochondrial OS=Homo sapiens GN=TRAP1 PE=1 SV=3                           | TRAP1_HUMAN  | ?       | TRUE | .760794718  | 1.3         | 46.417 | 1.0432 | 0       | 15.65   | 25.414  | 21.615  |
| 715 | TRUE | Empty | Heat shock protein beta-1 OS=Homo sapiens GN=HSPB1 PE=1 SV=2                                          | HSPB1_HUMAN  | 23 kDa  | TRUE | .003991209  | 0.244920858 | 176.83 | 264.97 | 211.46  | 68.56   | 57.605  | 33.832  |
| 716 | TRUE | Empty | Heat shock protein HSP 90-alpha OS=Homo sapiens GN=HSP90AA1 PE=1 SV=5                                 | HSP90A_HUMAN | ?       | TRUE | .691283762  | 1.2         | 349.23 | 56.331 | 139.64  | 279.46  | 168.58  | 216.15  |
| 717 | TRUE | Empty | Heat shock protein HSP 90-beta OS=Homo sapiens GN=HSP90AB1 PE=1 SV=4                                  | HSP90B_HUMAN | 83 kDa  | TRUE | .537483646  | 1.3         | 265.24 | 37.554 | 108.72  | 221.33  | 155.87  | 175.74  |
| 718 | TRUE | Empty | Heat shock-related 70 kDa protein 2 OS=Homo sapiens GN=HSPA2 PE=1 SV=1                                | HSPA2_HUMAN  | 70 kDa  | TRUE | .014238855  | 0.442871496 | 90.623 | 145    | 119.69  | 47.694  | 54.217  | 55.447  |

|     |      |       |                                                                                               |             |        |      |             |             |        |        |         |         |         |         |
|-----|------|-------|-----------------------------------------------------------------------------------------------|-------------|--------|------|-------------|-------------|--------|--------|---------|---------|---------|---------|
| 719 | TRUE | Empty | Hematological and neurological expressed 1 protein OS=Homo sapiens GN=HN1 PE=1 SV=3           | HN1_HUMAN   | ?      |      | 0.247173027 | 0.3         | 0      | 11.475 | 12.967  | 3.61    | 3.85    | 0       |
| 720 | TRUE | Empty | Hematological and neurological expressed 1-like protein OS=Homo sapiens GN=HN1L PE=1 SV=1     | HN1L_HUMAN  | ?      |      | 0.21281136  | 0.2         | 0      | 8.54   | 8.71    | 0.74522 | 2.14    | 0.93978 |
| 721 | TRUE | Empty | Heme-binding protein 1 OS=Homo sapiens GN=HEBP1 PE=1 SV=1                                     | HEBP1_HUMAN | 21 kDa |      | 0.562574355 | 0.6         | 0      | 5.59   | 5.47    | 4.13    | 1.43    | 0.93978 |
| 722 | TRUE | Empty | Heme-binding protein 2 OS=Homo sapiens GN=HEBP2 PE=1 SV=1                                     | HEBP2_HUMAN | ?      | TRUE | .613850651  | 0.7         | 0      | 9.86   | 21.944  | 8.74    | 5.0828  | 7.83    |
| 723 | TRUE | Empty | Hemoglobin subunit alpha OS=Homo sapiens GN=HBA1 PE=1 SV=2                                    | HBA_HUMAN   | 15 kDa | TRUE | .727941284  | 0.7         | 0      | 11.475 | 35.908  | 8.26    | 9.85    | 16.916  |
| 724 | TRUE | Empty | Hemoglobin subunit beta OS=Homo sapiens GN=HBB PE=1 SV=2                                      | HBB_HUMAN   | 16 kDa | TRUE | .158199504  | 0.4         | 6.631  | 17.734 | 19.949  | 5.65    | 2.14    | 11.277  |
| 725 | TRUE | Empty | Hepatocyte growth factor-regulated tyrosine kinase substrate OS=Homo sapiens GN=HGS PE=1 SV=1 | HGS_HUMAN   | ?      | TRUE | .639358056  | 1.7         | 0      | 1.0432 | 1.49    | 0       | 4.57    | 0.93978 |
| 726 | TRUE | Empty | Hepatocyte nuclear factor 3-alpha OS=Homo sapiens GN=FOXA1 PE=1 SV=2                          | FOXA1_HUMAN | ?      | TRUE | .022343681  | 5.926453191 | 0      | 0      | 0.99746 | 1.04    | 2.14    | 1.96    |
| 727 | TRUE | Empty | Hepatoma-derived growth factor OS=Homo sapiens GN=HDGF PE=1 SV=1                              | HDGF_HUMAN  | ?      | TRUE | 0.80255124  | 1.2         | 0      | 8.54   | 15.959  | 18.63   | 4.57    | 6.85    |
| 728 | TRUE | Empty | Hepatoma-derived growth factor-related protein 2 OS=Homo sapiens GN=HDGFRP2 PE=1 SV=1         | HDGR2_HUMAN | ?      | TRUE | .741983428  | 1.3         | 0      | 2.0863 | 1.49    | 0.74522 | 0.84713 | 3.91    |
| 729 | TRUE | Empty | Heterogeneous nuclear ribonucleoprotein A/B OS=Homo sapiens GN=HNRNPAB PE=1 SV=2              | ROAA_HUMAN  | ?      | TRUE | .455741301  | 0.7         | 8.13   | 44.856 | 33.914  | 14.904  | 22.025  | 23.495  |
| 730 | TRUE | Empty | Heterogeneous nuclear ribonucleoprotein A0 OS=Homo sapiens GN=HNRNPA0 PE=1 SV=1               | ROA0_HUMAN  | 31 kDa | TRUE | .051228521  | 0.2         | 17.683 | 8.54   | 8.71    | 2.57    | 5.0828  | 0       |
| 731 | TRUE | Empty | Heterogeneous nuclear ribonucleoprotein A1 OS=Homo sapiens GN=HNRNPA1 PE=1 SV=5               | ROA1_HUMAN  | ?      | TRUE | 0.01311536  | 0.27783188  | 68.52  | 59.461 | 84.784  | 17.14   | 37.274  | 4.89    |
| 732 | TRUE | Empty | Heterogeneous nuclear ribonucleoprotein A3 OS=Homo sapiens GN=HNRNPA3 PE=1 SV=2               | ROA3_HUMAN  | ?      | TRUE | .107699507  | 0.5         | 30.944 | 73.022 | 73.812  | 32.79   | 31.344  | 24.434  |
| 733 | TRUE | Empty | Heterogeneous nuclear ribonucleoprotein D0 OS=Homo sapiens GN=HNRNPD PE=1 SV=1                | HNRPD_HUMAN | ?      | TRUE | .708232672  | 0.8         | 8.13   | 35.468 | 44.886  | 21.611  | 33.038  | 20.675  |
| 734 | TRUE | Empty | Heterogeneous nuclear ribonucleoprotein D-like OS=Homo sapiens GN=HNRNPDL PE=1 SV=3           | HNRDL_HUMAN | ?      | TRUE | .962853544  | 1           | 2.03   | 14.604 | 19.949  | 6.707   | 16.943  | 12.217  |
| 735 | TRUE | Empty | Heterogeneous nuclear ribonucleoprotein F OS=Homo sapiens GN=HNRNPF PE=1 SV=3                 | HNRPF_HUMAN | 46 kDa | TRUE | .531241972  | 0.7         | 19.893 | 41.727 | 51.868  | 49.93   | 18.637  | 15.037  |
| 736 | TRUE | Empty | Heterogeneous nuclear ribonucleoprotein H OS=Homo sapiens GN=HNRNPH1 PE=1 SV=4                | HNRH1_HUMAN | 49 kDa | TRUE | .616450921  | 0.8         | 33.155 | 53.202 | 68.825  | 76.757  | 17.79   | 26.314  |
| 737 | TRUE | Empty | Heterogeneous nuclear ribonucleoprotein H2 OS=Homo sapiens GN=HNRNPH2 PE=1 SV=1               | HNRH2_HUMAN | 49 kDa | TRUE | .937795618  | 1           | 26.524 | 30.252 | 43.888  | 72.286  | 14.401  | 18.796  |
| 738 | TRUE | Empty | Heterogeneous nuclear ribonucleoprotein H3 OS=Homo sapiens GN=HNRNPH3 PE=1 SV=2               | HNRH3_HUMAN | ?      | TRUE | .428747465  | 0.8         | 13.262 | 6.259  | 10.972  | 9.78    | 4.57    | 9.78    |
| 739 | TRUE | Empty | Heterogeneous nuclear ribonucleoprotein K OS=Homo sapiens GN=HNRNPK PE=1 SV=1                 | HNRPK_HUMAN | ?      | TRUE | .041418424  | 0.658267622 | 110.52 | 100.14 | 89.771  | 64.089  | 83.866  | 49.809  |
| 740 | TRUE | Empty | Heterogeneous nuclear ribonucleoprotein L OS=Homo sapiens GN=HNRNPL PE=1 SV=2                 | HNRPL_HUMAN | ?      | TRUE | .374659478  | 0.5         | 0      | 58.418 | 36.906  | 16.395  | 12.707  | 15.037  |
| 741 | TRUE | Empty | Heterogeneous nuclear ribonucleoprotein L-like OS=Homo sapiens GN=HNRNPLL PE=1 SV=1           | HNRL_HUMAN  | ?      | TRUE | .121394667  | INF         | 0      | 0      | 0       | 1.04    | 0       | 1.96    |
| 742 | TRUE | Empty | Heterogeneous nuclear ribonucleoprotein M OS=Homo sapiens GN=HNRNPM PE=1 SV=3                 | HNRPM_HUMAN | ?      | TRUE | .052505918  | 0.6         | 81.782 | 94.929 | 95.756  | 36.516  | 73.701  | 63.905  |
| 743 | TRUE | Empty | Heterogeneous nuclear ribonucleoprotein Q OS=Homo sapiens GN=SYNCRIP PE=1 SV=2                | HNRPO_HUMAN | ?      | TRUE | .504097358  | 0.8         | 44.206 | 21.907 | 29.924  | 20.121  | 28.803  | 31.013  |
| 744 | TRUE | Empty | Heterogeneous nuclear ribonucleoprotein R OS=Homo sapiens GN=HNRNPR PE=1 SV=1                 | HNRPR_HUMAN | ?      | TRUE | .318853558  | 0.8         | 22.103 | 15.648 | 21.944  | 9.78    | 18.637  | 18.796  |

|     |      |       |                                                                                                   |             |        |      |             |             |        |        |         |         |         |         |
|-----|------|-------|---------------------------------------------------------------------------------------------------|-------------|--------|------|-------------|-------------|--------|--------|---------|---------|---------|---------|
| 745 | TRUE | Empty | Heterogeneous nuclear ribonucleoprotein U OS=Homo sapiens<br>GN=HNRNPU PE=1 SV=6                  | HNRPU_HUMAN | ?      | TRUE | .814229947  | 0.9         | 37.575 | 12.518 | 49.873  | 39.497  | 27.955  | 23.495  |
| 746 | TRUE | Empty | Heterogeneous nuclear ribonucleoprotein U-like protein 1<br>OS=Homo sapiens GN=HNRNPUL1 PE=1 SV=2 | HNRL1_HUMAN | ?      | TRUE | .024169728  | 6.268346478 | 0      | 0      | 2.24    | 5.65    | 5.0828  | 8.81    |
| 747 | TRUE | Empty | Heterogeneous nuclear ribonucleoprotein U-like protein 2<br>OS=Homo sapiens GN=HNRNPUL2 PE=1 SV=1 | HNRL2_HUMAN | 85 kDa | TRUE | .543956482  | 1.3         | 4.06   | 18.777 | 15.959  | 15.65   | 12.707  | 20.675  |
| 748 | TRUE | Empty | Heterogeneous nuclear ribonucleoproteins A2/B1 OS=Homo<br>sapiens GN=HNRNPA2B1 PE=1 SV=2          | ROA2_HUMAN  | ?      | TRUE | .067278605  | 0.6         | 66.31  | 105.36 | 80.794  | 64.089  | 45.745  | 30.073  |
| 749 | TRUE | Empty | Heterogeneous nuclear ribonucleoproteins C1/C2 OS=Homo<br>sapiens GN=HNRNPC PE=1 SV=4             | HNRPC_HUMAN | ?      | TRUE | .303197603  | 0.8         | 39.786 | 55.288 | 63.837  | 44.713  | 46.592  | 42.29   |
| 750 | TRUE | Empty | Heterochromatin protein 1-binding protein 3 OS=Homo sapiens<br>GN=HP1BP3 PE=1 SV=1                | HP1B3_HUMAN | ?      | TRUE | 0.17096993  | 2.5         | 0      | 1.0432 | 0.99746 | 0.74522 | 2.14    | 1.96    |
| 751 | TRUE | Empty | Hexokinase-1 OS=Homo sapiens GN=HK1 PE=1 SV=3                                                     | HXX1_HUMAN  | ?      | TRUE | .198966639  | 2.6         | 19.893 | 0      | 0.99746 | 11.923  | 20.331  | 21.615  |
| 752 | TRUE | Empty | High mobility group protein B1 OS=Homo sapiens GN=HMGB1<br>PE=1 SV=3                              | HMGB1_HUMAN | 25 kDa | TRUE | .487911839  | 0.7         | 41.996 | 166.91 | 115.71  | 90.171  | 74.548  | 76.122  |
| 753 | TRUE | Empty | High mobility group protein B2 OS=Homo sapiens GN=HMGB2<br>PE=1 SV=2                              | HMGB2_HUMAN | 24 kDa | TRUE | .845973139  | 1.1         | 13.262 | 36.511 | 48.875  | 32.044  | 35.58   | 37.591  |
| 754 | TRUE | Empty | High mobility group protein B3 OS=Homo sapiens GN=HMGB3<br>PE=1 SV=4                              | HMGB3_HUMAN | 23 kDa | TRUE | .978962266  | 1           | 6.631  | 23.993 | 27.929  | 16.395  | 23.72   | 17.856  |
| 755 | TRUE | Empty | Hippocalcin-like protein 1 OS=Homo sapiens GN=HPCAL1 PE=1<br>SV=3                                 | HPCL1_HUMAN | 22 kDa | TRUE | .146055018  | 3.4         | 0      | 0      | 0.99746 | 0.74522 | 1.43    | 0.93978 |
| 756 | TRUE | Empty | Histidine triad nucleotide-binding protein 1 OS=Homo sapiens<br>GN=HINT1 PE=1 SV=2                | HINT1_HUMAN | 14 kDa |      | 0.5255283   | 0.6         | 0      | 8.54   | 9.46    | 5.65    | 0       | 5.87    |
| 757 | TRUE | Empty | Histidine triad nucleotide-binding protein 2, mitochondrial<br>OS=Homo sapiens GN=HINT2 PE=1 SV=1 | HINT2_HUMAN | 17 kDa |      | 0.782678988 | 0.7         | 0      | 2.0863 | 0.99746 | 2.57    | 0       | 0       |
| 758 | TRUE | Empty | Histidine--tRNA ligase, cytoplasmic OS=Homo sapiens GN=HARS<br>PE=1 SV=2                          | SYHC_HUMAN  | ?      | TRUE | .841255959  | 0.8         | 6.631  | 0      | 1.49    | 3.61    | 1.43    | 1.96    |
| 759 | TRUE | Empty | Histone acetyltransferase type B catalytic subunit OS=Homo<br>sapiens GN=HAT1 PE=1 SV=1           | HAT1_HUMAN  | ?      | TRUE | .121394667  | INF         | 0      | 0      | 0       | 1.04    | 0       | 1.96    |
| 760 | TRUE | Empty | Histone deacetylase 1 OS=Homo sapiens GN=HDAC1 PE=1 SV=1                                          | HDAC1_HUMAN | 55 kDa | TRUE | 0.13481951  | 3.5         | 2.03   | 0      | 3.98    | 2.57    | 9.85    | 10.338  |
| 761 | TRUE | Empty | Histone deacetylase 2 OS=Homo sapiens GN=HDAC2 PE=1 SV=2                                          | HDAC2_HUMAN | ?      | TRUE | .275439385  | 2.2         | 8.13   | 3.1295 | 0.99746 | 3.61    | 15.248  | 9.78    |
| 762 | TRUE | Empty | Histone H1.2 OS=Homo sapiens GN=HIST1H1C PE=1 SV=2                                                | H12_HUMAN   | 21 kDa | TRUE | .549022903  | 0.5         | 22.103 | 2.0863 | 3.98    | 6.707   | 5.99    | 2.94    |
| 763 | TRUE | Empty | Histone H1.5 OS=Homo sapiens GN=HIST1H1B PE=1 SV=3                                                | H15_HUMAN   | 23 kDa | TRUE | .555089633  | 0.4         | 22.103 | 0      | 0.99746 | 2.09    | 3.85    | 2.94    |
| 764 | TRUE | Empty | Histone H1x OS=Homo sapiens GN=H1FX PE=1 SV=1                                                     | H1X_HUMAN   | 22 kDa |      | 0.373900966 | 0           | 0      | 0      | 2.24    | 0       | 0       | 0       |
| 765 | TRUE | Empty | Histone H2A type 2-C OS=Homo sapiens GN=HIST2H2AC PE=1<br>SV=4                                    | H2A2C_HUMAN | 14 kDa | TRUE | .390882903  | 0.4         | 475.22 | 60.504 | 99.746  | 65.579  | 119.45  | 65.785  |
| 766 | TRUE | Empty | Histone H2A.V OS=Homo sapiens GN=H2AFV PE=1 SV=3                                                  | H2AV_HUMAN  | ?      | TRUE | .611010306  | 1.3         | 6.631  | 7.22   | 23.939  | 9.78    | 23.72   | 15.976  |
| 767 | TRUE | Empty | Histone H2B type 1-C/E/F/G/I OS=Homo sapiens GN=HIST1H2BC<br>PE=1 SV=4                            | H2B1C_HUMAN | 14 kDa | TRUE | .326937254  | 0.7         | 327.13 | 156.48 | 246.37  | 174.38  | 242.28  | 95.858  |
| 768 | TRUE | Empty | Histone H2B type 2-E OS=Homo sapiens GN=HIST2H2BE PE=1<br>SV=3                                    | H2B2E_HUMAN | 14 kDa | TRUE | .249702531  | 0.6         | 322.71 | 153.35 | 234.4   | 166.93  | 212.63  | 73.303  |
| 769 | TRUE | Empty | Histone H4 OS=Homo sapiens GN=HIST1H4A PE=1 SV=2                                                  | H4_HUMAN    | 11 kDa |      | 0.295929165 | 2           | 70.73  | 3.1295 | 6.22    | 49.184  | 65.229  | 47.929  |
| 770 | TRUE | Empty | Histone-arginine methyltransferase CARM1 OS=Homo sapiens<br>GN=CARM1 PE=1 SV=3                    | CARM1_HUMAN | ?      |      | 0.189953018 | INF         | 0      | 0      | 0       | 2.57    | 0.84713 | 0       |
| 771 | TRUE | Empty | Histone-binding protein RBBP4 OS=Homo sapiens GN=RBBP4<br>PE=1 SV=3                               | RBBP4_HUMAN | ?      | TRUE | .212239959  | 1.9         | 0      | 4.1727 | 8.71    | 7.22    | 7.42    | 10.338  |
| 772 | TRUE | Empty | Histone-binding protein RBBP7 OS=Homo sapiens GN=RBBP7<br>PE=1 SV=1                               | RBBP7_HUMAN | ?      | TRUE | .334575215  | 1.7         | 0      | 4.1727 | 11.969  | 8.74    | 9.85    | 10.338  |
| 773 | TRUE | Empty | Histone-lysine N-methyltransferase SETD7 OS=Homo sapiens<br>GN=SETD7 PE=1 SV=1                    | SETD7_HUMAN | 41 kDa |      | 0.225136446 | 0.1         | 0      | 4.1727 | 1.49    | 0       | 0.84713 | 0       |

|     |      |       |                                                                                       |             |         |      |             |             |        |         |         |         |         |         |
|-----|------|-------|---------------------------------------------------------------------------------------|-------------|---------|------|-------------|-------------|--------|---------|---------|---------|---------|---------|
| 774 | TRUE | Empty | HIV Tat-specific factor 1 OS=Homo sapiens GN=HTATSF1 PE=1 SV=1                        | HTSF1_HUMAN | 86 kDa  |      | 0.068186251 | 5           | 0      | 0       | 0.99746 | 2.57    | 0.84713 | 1.96    |
| 775 | TRUE | Empty | Host cell factor 1 OS=Homo sapiens GN=HCFC1 PE=1 SV=2                                 | HCFC1_HUMAN | ?       |      | 0.946462977 | 1           | 0      | 7.22    | 8.71    | 4.13    | 6.71    | 5.87    |
| 776 | TRUE | Empty | Hsc70-interacting protein OS=Homo sapiens GN=ST13 PE=1 SV=2                           | F10A1_HUMAN | 41 kDa  | TRUE | .745969406  | 1.1         | 2.03   | 4.1727  | 5.47    | 5.17    | 5.0828  | 2.94    |
| 777 | TRUE | Empty | Hsp70-binding protein 1 OS=Homo sapiens GN=HSPBP1 PE=1 SV=1                           | HPBP1_HUMAN | ?       |      | 0.009521936 | 4.227868787 | 0      | 0.99746 | 0       | 1.04    | 0.84713 | 1.96    |
| 778 | TRUE | Empty | Hsp90 co-chaperone Cdc37 OS=Homo sapiens GN=CDC37 PE=1 SV=1                           | CDC37_HUMAN | 44 kDa  | TRUE | .581189718  | 0.5         | 2.03   | 0       | 11.969  | 3.61    | 0.84713 | 2.94    |
| 779 | TRUE | Empty | Huntingtin OS=Homo sapiens GN=HTT PE=1 SV=2                                           | HD_HUMAN    | 348 kDa | TRUE | .145333264  | INF         | 0      | 0       | 0       | 0.74522 | 0.84713 | 3.91    |
| 780 | TRUE | Empty | Huntingtin-interacting protein 1-related protein OS=Homo sapiens GN=HIP1R PE=1 SV=2   | HIP1R_HUMAN | ?       | TRUE | .014880189  | 4.330118501 | 0      | 0.99746 | 0       | 0.74522 | 1.43    | 1.96    |
| 781 | TRUE | Empty | Hydroxyacyl-coenzyme A dehydrogenase, mitochondrial OS=Homo sapiens GN=HADH PE=1 SV=3 | HCDH_HUMAN  | ?       |      | 0.775877095 | 0.7         | 0      | 1.0432  | 0.99746 | 1.04    | 0       | 0       |
| 782 | TRUE | Empty | Hydroxyacylglutathione hydrolase, mitochondrial OS=Homo sapiens GN=HAGH PE=1 SV=2     | GLO2_HUMAN  | ?       |      | 0.575126505 | 0.6         | 0      | 3.1295  | 5.47    | 3.61    | 0.84713 | 0.93978 |
| 783 | TRUE | Empty | Hydroxymethylglutaryl-CoA lyase, mitochondrial OS=Homo sapiens GN=HMGCL PE=1 SV=2     | HMGCL_HUMAN | ?       |      | 0.231711402 | INF         | 0      | 0       | 0       | 0.74522 | 0       | 2.94    |
| 784 | TRUE | Empty | Hydroxymethylglutaryl-CoA synthase, cytoplasmic OS=Homo sapiens GN=HMGC1 PE=1 SV=2    | HMCS1_HUMAN | 57 kDa  | TRUE | .007459224  | 4.986189983 | 0      | 4.1727  | 0.99746 | 8.26    | 9.85    | 7.83    |
| 785 | TRUE | Empty | Hydroxysteroid dehydrogenase-like protein 2 OS=Homo sapiens GN=HSDL2 PE=1 SV=1        | HSDL2_HUMAN | ?       |      | 0.184606477 | INF         | 0      | 0       | 0       | 0.74522 | 0       | 1.96    |
| 786 | TRUE | Empty | Hypoxanthine-guanine phosphoribosyltransferase OS=Homo sapiens GN=HPRT1 PE=1 SV=2     | HPRT_HUMAN  | 25 kDa  | TRUE | .356492995  | 1.4         | 2.03   | 12.518  | 6.22    | 9.78    | 10.166  | 11.277  |
| 787 | TRUE | Empty | Hypoxia up-regulated protein 1 OS=Homo sapiens GN=HYOU1 PE=1 SV=1                     | HYOU1_HUMAN | ?       | TRUE | .005591786  | 5.77791303  | 2.03   | 3.1295  | 0       | 9.78    | 12.707  | 8.81    |
| 788 | TRUE | Empty | Charged multivesicular body protein 3 OS=Homo sapiens GN=CHMP3 PE=1 SV=3              | CHMP3_HUMAN | ?       |      | 0.84022402  | 1.2         | 0      | 1.0432  | 1.49    | 0       | 1.43    | 1.96    |
| 789 | TRUE | Empty | Charged multivesicular body protein 4a OS=Homo sapiens GN=CHMP4A PE=1 SV=3            | CHM4A_HUMAN | ?       |      | 0.593553623 | 0.6         | 0      | 1.0432  | 2.24    | 1.04    | 0.84713 | 0       |
| 790 | TRUE | Empty | Charged multivesicular body protein 4b OS=Homo sapiens GN=CHMP4B PE=1 SV=1            | CHM4B_HUMAN | 25 kDa  | TRUE | .404244787  | 0.4         | 0      | 3.1295  | 5.47    | 2.57    | 1.43    | 0       |
| 791 | TRUE | Empty | Chloride intracellular channel protein 1 OS=Homo sapiens GN=CLIC1 PE=1 SV=4           | CLIC1_HUMAN | 27 kDa  |      | 0.010303208 | 0.721061032 | 19.893 | 22.95   | 22.942  | 16.395  | 16.943  | 14.097  |
| 792 | TRUE | Empty | Chloride intracellular channel protein 3 OS=Homo sapiens GN=CLIC3 PE=1 SV=2           | CLIC3_HUMAN | 27 kDa  | TRUE | .195440388  | 0.2         | 0      | 4.1727  | 5.47    | 0       | 0.84713 | 0.93978 |
| 793 | TRUE | Empty | Chloride intracellular channel protein 4 OS=Homo sapiens GN=CLIC4 PE=1 SV=4           | CLIC4_HUMAN | 29 kDa  |      | 0.915011943 | 1.1         | 0      | 3.1295  | 1.49    | 3.61    | 0       | 1.96    |
| 794 | TRUE | Empty | Choline transporter-like protein 1 OS=Homo sapiens GN=SLC44A1 PE=1 SV=1               | CTL1_HUMAN  | ?       |      | 0.096931939 | 8.9         | 0      | 0       | 0.99746 | 0.74522 | 3.85    | 4.89    |
| 795 | TRUE | Empty | Choline transporter-like protein 2 OS=Homo sapiens GN=SLC44A2 PE=1 SV=3               | CTL2_HUMAN  | ?       |      | 0.5751267   | 0.5         | 0      | 2.0863  | 1.49    | 2.57    | 0       | 0       |
| 796 | TRUE | Empty | Choline-phosphate cytidyltransferase A OS=Homo sapiens GN=PCYT1A PE=1 SV=2            | PCY1A_HUMAN | 42 kDa  | TRUE | .928726266  | 0.9         | 0      | 3.1295  | 1.49    | 2.57    | 2.14    | 0       |
| 797 | TRUE | Empty | Chromatin complexes subunit BAP18 OS=Homo sapiens GN=BAP18 PE=1 SV=1                  | BAP18_HUMAN | ?       |      | 0.165289766 | 0.1         | 0      | 10.432  | 8.71    | 0       | 1.43    | 0.93978 |
| 798 | TRUE | Empty | Chromobox protein homolog 1 OS=Homo sapiens GN=CBX1 PE=1 SV=1                         | CBX1_HUMAN  | 21 kDa  | TRUE | .081078498  | 0.6         | 11.052 | 14.604  | 15.959  | 11.178  | 8.13    | 3.91    |
| 799 | TRUE | Empty | Chromobox protein homolog 3 OS=Homo sapiens GN=CBX3 PE=1 SV=4                         | CBX3_HUMAN  | 21 kDa  | TRUE | .544570353  | 0.8         | 26.524 | 15.648  | 14.962  | 20.121  | 16.096  | 12.217  |
| 800 | TRUE | Empty | Chromobox protein homolog 5 OS=Homo sapiens GN=CBX5 PE=1 SV=1                         | CBX5_HUMAN  | 22 kDa  | TRUE | .837586551  | 1.1         | 6.631  | 0       | 9.46    | 8.26    | 5.0828  | 4.89    |

|     |      |       |                                                                                                                  |             |         |      |             |             |         |        |         |         |         |         |
|-----|------|-------|------------------------------------------------------------------------------------------------------------------|-------------|---------|------|-------------|-------------|---------|--------|---------|---------|---------|---------|
| 801 | TRUE | Empty | Chromodomain-helicase-DNA-binding protein 4 OS=Homo sapiens GN=CHD4 PE=1 SV=2                                    | CHD4_HUMAN  | ?       | TRUE | .045359676  | 3.254356725 | 4.06    | 0      | 0.99746 | 5.65    | 6.71    | 5.87    |
| 802 | TRUE | Empty | Immunity-related GTPase family Q protein OS=Homo sapiens GN=IRGQ PE=1 SV=1                                       | IRGQ_HUMAN  | 63 kDa  | TRUE | 0.27968692  | 8.6         | 0       | 0      | 0.99746 | 6.707   | 0       | 1.96    |
| 803 | TRUE | Empty | Importin subunit alpha-1 OS=Homo sapiens GN=KPNA2 PE=1 SV=1                                                      | IMA1_HUMAN  | 58 kDa  |      | 0.099813876 | 3.4         | 8.13    | 1.0432 | 0.99746 | 12.669  | 6.71    | 17.856  |
| 804 | TRUE | Empty | Importin subunit alpha-3 OS=Homo sapiens GN=KPNA4 PE=1 SV=1                                                      | IMA3_HUMAN  | 58 kDa  | TRUE | 0.05629162  | 2.6         | 2.03    | 0      | 3.98    | 5.65    | 5.99    | 4.89    |
| 805 | TRUE | Empty | Importin subunit alpha-4 OS=Homo sapiens GN=KPNA3 PE=1 SV=2                                                      | IMA4_HUMAN  | 58 kDa  | TRUE | .337175177  | 2.3         | 2.03    | 0      | 0       | 0.74522 | 2.14    | 1.96    |
| 806 | TRUE | Empty | Importin subunit alpha-7 OS=Homo sapiens GN=KPNA6 PE=1 SV=1                                                      | IMA7_HUMAN  | 60 kDa  | TRUE | .005690322  | 20.05262653 | 0       | 1.0432 | 0       | 5.17    | 9.85    | 5.87    |
| 807 | TRUE | Empty | Importin subunit beta-1 OS=Homo sapiens GN=KPNB1 PE=1 SV=2                                                       | IMB1_HUMAN  | ?       |      | 0.128888016 | 2.2         | 35.365  | 6.259  | 6.22    | 36.516  | 38.968  | 30.073  |
| 808 | TRUE | Empty | Importin-4 OS=Homo sapiens GN=IPO4 PE=1 SV=2                                                                     | IPO4_HUMAN  | ?       | TRUE | 0.08007674  | 3.6         | 17.683  | 0      | 1.49    | 14.159  | 28.803  | 28.194  |
| 809 | TRUE | Empty | Importin-5 OS=Homo sapiens GN=IPO5 PE=1 SV=4                                                                     | IPO5_HUMAN  | ?       | TRUE | .014237465  | 21.20836926 | 0.99746 | 0      | 0       | 10.433  | 5.0828  | 5.87    |
| 810 | TRUE | Empty | Importin-7 OS=Homo sapiens GN=IPO7 PE=1 SV=1                                                                     | IPO7_HUMAN  | 120 kDa | TRUE | .028238364  | 6.791046464 | 4.06    | 0      | 0       | 7.22    | 8.13    | 14.097  |
| 811 | TRUE | Empty | Importin-9 OS=Homo sapiens GN=IPO9 PE=1 SV=3                                                                     | IPO9_HUMAN  | 116 kDa |      | 0.144191754 | INF         | 0       | 0      | 0       | 0.74522 | 5.99    | 1.96    |
| 812 | TRUE | Empty | Inorganic pyrophosphatase 2, mitochondrial OS=Homo sapiens GN=PPA2 PE=1 SV=2                                     | IPYR2_HUMAN | ?       |      | 0.212298995 | 2.2         | 0       | 5.59   | 2.24    | 2.09    | 8.13    | 6.85    |
| 813 | TRUE | Empty | Inorganic pyrophosphatase OS=Homo sapiens GN=PPA1 PE=1 SV=2                                                      | IPYR_HUMAN  | 33 kDa  |      | 0.919632846 | 1           | 6.631   | 23.993 | 25.934  | 17.885  | 16.943  | 19.735  |
| 814 | TRUE | Empty | Inosine-5'-monophosphate dehydrogenase 2 OS=Homo sapiens GN=IMPDH2 PE=1 SV=2                                     | IMDH2_HUMAN | 56 kDa  | TRUE | .097302296  | 0.5         | 8.13    | 18.777 | 12.967  | 6.707   | 7.42    | 7.83    |
| 815 | TRUE | Empty | Insulin receptor substrate 1 OS=Homo sapiens GN=IRS1 PE=1 SV=1                                                   | IRS1_HUMAN  | 132 kDa |      | 0.367102274 | 0.4         | 0       | 5.59   | 2.24    | 0.74522 | 0.84713 | 1.96    |
| 816 | TRUE | Empty | Integrin alpha-2 OS=Homo sapiens GN=ITGA2 PE=1 SV=1                                                              | ITA2_HUMAN  | 129 kDa | TRUE | .080922552  | INF         | 0       | 0      | 0       | 0.74522 | 1.43    | 3.91    |
| 817 | TRUE | Empty | Integrin alpha-IIb OS=Homo sapiens GN=ITGA2B PE=1 SV=3                                                           | ITA2B_HUMAN | ?       |      | 0.373900966 | 0           | 0       | 0      | 2.24    | 0       | 0       | 0       |
| 818 | TRUE | Empty | Integrin beta-1 OS=Homo sapiens GN=ITGB1 PE=1 SV=2                                                               | ITB1_HUMAN  | ?       |      | 0.059060944 | 4.6         | 0       | 1.0432 | 0.99746 | 2.09    | 1.43    | 4.89    |
| 819 | TRUE | Empty | Inter-alpha-trypsin inhibitor heavy chain H1 OS=Homo sapiens GN=ITIH1 PE=1 SV=3                                  | ITIH1_HUMAN | ?       | TRUE | .373900966  | 0           | 0       | 0      | 2.24    | 0       | 0       | 0       |
| 820 | TRUE | Empty | Inter-alpha-trypsin inhibitor heavy chain H2 OS=Homo sapiens GN=ITIH2 PE=1 SV=2                                  | ITIH2_HUMAN | 106 kDa |      | 0.845466072 | 0.9         | 0       | 4.1727 | 6.22    | 1.04    | 2.14    | 5.87    |
| 821 | TRUE | Empty | Interferon regulatory factor 2-binding protein 1 OS=Homo sapiens GN=IRF2BP1 PE=1 SV=1                            | I2BP1_HUMAN | 62 kDa  | TRUE | .836221794  | 0.9         | 2.03    | 2.0863 | 1.49    | 2.57    | 0.84713 | 2.94    |
| 822 | TRUE | Empty | Interferon regulatory factor 2-binding protein 2 OS=Homo sapiens GN=IRF2BP2 PE=1 SV=2                            | I2BP2_HUMAN | ?       | TRUE | .178737427  | 0.4         | 2.03    | 10.432 | 5.47    | 1.04    | 2.14    | 2.94    |
| 823 | TRUE | Empty | Interferon regulatory factor 2-binding protein-like OS=Homo sapiens GN=IRF2BPL PE=1 SV=1                         | I2BPL_HUMAN | 83 kDa  | TRUE | .378886963  | 0.4         | 0       | 9.86   | 4.73    | 0.74522 | 2.14    | 2.94    |
| 824 | TRUE | Empty | Interferon-induced, double-stranded RNA-activated protein kinase OS=Homo sapiens GN=EIF2AK2 PE=1 SV=2            | E2AK2_HUMAN | ?       | TRUE | .076246162  | 7           | 2.03    | 0      | 0       | 5.17    | 7.42    | 1.96    |
| 825 | TRUE | Empty | Interferon-inducible double-stranded RNA-dependent protein kinase activator A OS=Homo sapiens GN=PRKRA PE=1 SV=1 | PRKRA_HUMAN | ?       |      | 0.401672964 | 2           | 0       | 2.0863 | 0       | 1.04    | 0.84713 | 1.96    |
| 826 | TRUE | Empty | Interleukin enhancer-binding factor 2 OS=Homo sapiens GN=ILF2 PE=1 SV=2                                          | ILF2_HUMAN  | 43 kDa  | TRUE | .041416164  | 1.608464038 | 8.13    | 13.561 | 11.969  | 21.611  | 18.637  | 15.037  |
| 827 | TRUE | Empty | Interleukin enhancer-binding factor 3 OS=Homo sapiens GN=ILF3 PE=1 SV=3                                          | ILF3_HUMAN  | ?       | TRUE | 0.28808888  | 1.3         | 19.893  | 11.475 | 23.939  | 26.083  | 21.178  | 22.555  |
| 828 | TRUE | Empty | Intraflagellar transport protein 27 homolog OS=Homo sapiens GN=IFT27 PE=1 SV=1                                   | IFT27_HUMAN | ?       |      | 0.642647753 | 0.5         | 0       | 2.0863 | 0       | 0       | 0       | 0.93978 |
| 829 | TRUE | Empty | Inverted formin-2 OS=Homo sapiens GN=INF2 PE=1 SV=2                                                              | INF2_HUMAN  | ?       |      | 0.627500576 | 1.5         | 6.631   | 0      | 0       | 2.09    | 3.85    | 3.91    |

|     |      |       |                                                                                                                  |             |         |      |             |             |         |        |         |         |         |         |
|-----|------|-------|------------------------------------------------------------------------------------------------------------------|-------------|---------|------|-------------|-------------|---------|--------|---------|---------|---------|---------|
| 830 | TRUE | Empty | Isoamyl acetate-hydrolyzing esterase 1 homolog OS=Homo sapiens GN=IAH1 PE=1 SV=1                                 | IAH1_HUMAN  | ?       |      | 0.432326179 | 0.5         | 0       | 7.22   | 4.73    | 0.74522 | 4.57    | 0.93978 |
| 831 | TRUE | Empty | Isocitrate dehydrogenase [NAD] subunit alpha, mitochondrial OS=Homo sapiens GN=IDH3A PE=1 SV=1                   | IDH3A_HUMAN | ?       |      | 0.00210632  | 7.720147533 | 2.03    | 1.0432 | 0       | 8.26    | 6.71    | 9.78    |
| 832 | TRUE | Empty | Isocitrate dehydrogenase [NAD] subunit beta, mitochondrial OS=Homo sapiens GN=IDH3B PE=1 SV=2                    | IDH3B_HUMAN | ?       | TRUE | .117744445  | INF         | 0       | 0      | 0       | 1.04    | 1.43    | 0       |
| 833 | TRUE | Empty | Isocitrate dehydrogenase [NADP] cytoplasmic OS=Homo sapiens GN=IDH1 PE=1 SV=2                                    | IDHC_HUMAN  | 47 kDa  | TRUE | .546823868  | 1.4         | 2.03    | 14.604 | 6.22    | 17.14   | 8.13    | 7.83    |
| 834 | TRUE | Empty | Isocitrate dehydrogenase [NADP], mitochondrial OS=Homo sapiens GN=IDH2 PE=1 SV=2                                 | IDHP_HUMAN  | ?       | TRUE | 0.002494    | 3.315540516 | 8.13    | 6.259  | 3.98    | 19.376  | 19.484  | 24.434  |
| 835 | TRUE | Empty | Isochorismatase domain-containing protein 1 OS=Homo sapiens GN=ISOC1 PE=1 SV=3                                   | ISOC1_HUMAN | 32 kDa  |      | 0.756007367 | 1.1         | 11.052  | 13.561 | 12.967  | 8.26    | 11.013  | 21.615  |
| 836 | TRUE | Empty | Isochorismatase domain-containing protein 2, mitochondrial OS=Homo sapiens GN=ISOC2 PE=1 SV=1                    | ISOC2_HUMAN | ?       |      | 0.458310893 | 2.3         | 0       | 0      | 0.99746 | 1.04    | 0.84713 | 0       |
| 837 | TRUE | Empty | Isoleucine--tRNA ligase, cytoplasmic OS=Homo sapiens GN=IARS PE=1 SV=2                                           | SYIC_HUMAN  | 145 kDa | TRUE | .001174808  | 14.12627245 | 2.03    | 0      | 0       | 9.78    | 9.85    | 12.217  |
| 838 | TRUE | Empty | Isoleucine--tRNA ligase, mitochondrial OS=Homo sapiens GN=IARS2 PE=1 SV=2                                        | SYIM_HUMAN  | 114 kDa | TRUE | .217218164  | INF         | 0       | 0      | 0       | 0       | 0.84713 | 2.94    |
| 839 | TRUE | Empty | Isopentenyl-diphosphate Delta-isomerase 1 OS=Homo sapiens GN=IDI1 PE=1 SV=2                                      | IDI1_HUMAN  | ?       |      | 0.314718277 | 2.1         | 0       | 3.1295 | 0.99746 | 2.57    | 1.43    | 4.89    |
| 840 | TRUE | Empty | Isovaleryl-CoA dehydrogenase, mitochondrial OS=Homo sapiens GN=IVD PE=1 SV=1                                     | IVD_HUMAN   | ?       |      | 0.27968692  | 8.6         | 0       | 0      | 0.99746 | 6.707   | 0       | 1.96    |
| 841 | TRUE | Empty | Junction plakoglobin OS=Homo sapiens GN=JUP PE=1 SV=3                                                            | PLAK_HUMAN  | 82 kDa  | TRUE | .023146446  | 2.533366523 | 6.631   | 1.0432 | 5.47    | 10.433  | 11.013  | 13.157  |
| 842 | TRUE | Empty | Kanadaplin OS=Homo sapiens GN=SLC4A1AP PE=1 SV=1                                                                 | NADAP_HUMAN | 89 kDa  |      | 0.146055018 | 3.4         | 0       | 0      | 0.99746 | 0.74522 | 1.43    | 0.93978 |
| 843 | TRUE | Empty | Keratin, type I cuticular Ha8 OS=Homo sapiens GN=KRT38 PE=1 SV=3                                                 | KRT38_HUMAN | 50 kDa  | TRUE | .050574492  | 0.5         | 4.06    | 4.1727 | 5.47    | 1.04    | 1.43    | 3.91    |
| 844 | TRUE | Empty | Keratin, type I cytoskeletal 10 OS=Homo sapiens GN=KRT10 PE=1 SV=6                                               | K1C10_HUMAN | 59 kDa  | TRUE | .063042626  | 0.08        | 17.683  | 7.22   | 5.47    | 1.04    | 0       | 0.93978 |
| 845 | TRUE | Empty | Keratin, type I cytoskeletal 16 OS=Homo sapiens GN=KRT16 PE=1 SV=4                                               | K1C16_HUMAN | 51 kDa  | TRUE | .070115658  | 0.4         | 61.889  | 23.993 | 45.883  | 12.669  | 22.025  | 13.157  |
| 846 | TRUE | Empty | Keratin, type I cytoskeletal 18 OS=Homo sapiens GN=KRT18 PE=1 SV=2                                               | K1C18_HUMAN | 48 kDa  | TRUE | .099430858  | 0.6         | 1 246.6 | 868.96 | 782.01  | 382.3   | 661.61  | 612.74  |
| 847 | TRUE | Empty | Keratin, type I cytoskeletal 19 OS=Homo sapiens GN=KRT19 PE=1 SV=4                                               | K1C19_HUMAN | 44 kDa  | TRUE | .051431323  | 0.7         | 800.14  | 817.85 | 850.83  | 722.86  | 584.52  | 413.5   |
| 848 | TRUE | Empty | Keratin, type I cytoskeletal 9 OS=Homo sapiens GN=KRT9 PE=1 SV=3                                                 | K1C9_HUMAN  | 62 kDa  | TRUE | .373900966  | INF         | 0       | 0      | 0       | 0       | 0       | 1.96    |
| 849 | TRUE | Empty | Keratin, type II cytoskeletal 1 OS=Homo sapiens GN=KRT1 PE=1 SV=6                                                | K2C1_HUMAN  | 66 kDa  | TRUE | 0.80854899  | 1.1         | 128.2   | 67.806 | 68.825  | 115.51  | 54.217  | 117.47  |
| 850 | TRUE | Empty | Keratin, type II cytoskeletal 2 epidermal OS=Homo sapiens GN=KRT2 PE=1 SV=2                                      | K22E_HUMAN  | 65 kDa  | TRUE | .531837205  | 0.6         | 2.03    | 10.432 | 22.942  | 5.17    | 2.14    | 13.157  |
| 851 | TRUE | Empty | Keratin, type II cytoskeletal 5 OS=Homo sapiens GN=KRT5 PE=1 SV=3                                                | K2C5_HUMAN  | 62 kDa  | TRUE | .119578236  | 0.3         | 6.631   | 6.259  | 15.959  | 0.74522 | 3.85    | 4.89    |
| 852 | TRUE | Empty | Keratin, type II cytoskeletal 7 OS=Homo sapiens GN=KRT7 PE=1 SV=5                                                | K2C7_HUMAN  | 51 kDa  | TRUE | 0.77922981  | 0.9         | 114.94  | 77.195 | 100.74  | 108.8   | 55.064  | 109.95  |
| 853 | TRUE | Empty | Keratin, type II cytoskeletal 8 OS=Homo sapiens GN=KRT8 PE=1 SV=7                                                | K2C8_HUMAN  | ?       | TRUE | .278845167  | 0.6         | 1 545.0 | 690.58 | 938.61  | 594.68  | 652.29  | 757.47  |
| 854 | TRUE | Empty | Keratin, type II cytoskeletal 80 OS=Homo sapiens GN=KRT80 PE=1 SV=2                                              | K2C80_HUMAN | ?       | TRUE | .957419353  | 1           | 119.36  | 70.936 | 95.756  | 115.51  | 57.605  | 109.01  |
| 855 | TRUE | Empty | KH domain-containing, RNA-binding, signal transduction-associated protein 1 OS=Homo sapiens GN=KHDRBS1 PE=1 SV=1 | KHDR1_HUMAN | ?       | TRUE | .295436989  | 2.2         | 0       | 0      | 2.24    | 2.57    | 2.14    | 1.96    |

|     |      |       |                                                                                                                                          |             |         |      |             |             |        |        |         |         |         |         |
|-----|------|-------|------------------------------------------------------------------------------------------------------------------------------------------|-------------|---------|------|-------------|-------------|--------|--------|---------|---------|---------|---------|
| 856 | TRUE | Empty | Kinesin light chain 1 OS=Homo sapiens GN=KLC1 PE=1 SV=2                                                                                  | KLC1_HUMAN  | ?       | TRUE | .439254504  | 1.5         | 0      | 6.259  | 3.98    | 4.13    | 5.99    | 4.89    |
| 857 | TRUE | Empty | Kinesin light chain 2 OS=Homo sapiens GN=KLC2 PE=1 SV=1                                                                                  | KLC2_HUMAN  | ?       | TRUE | .439933611  | 1.7         | 0      | 5.59   | 3.98    | 8.74    | 1.43    | 5.87    |
| 858 | TRUE | Empty | Kinesin light chain 4 OS=Homo sapiens GN=KLC4 PE=1 SV=3                                                                                  | KLC4_HUMAN  | ?       | TRUE | .071986351  | 5.9         | 0      | 0      | 0.99746 | 2.57    | 0.84713 | 2.94    |
| 859 | TRUE | Empty | Kinesin-1 heavy chain OS=Homo sapiens GN=KIF5B PE=1 SV=1<br>KN motif and ankyrin repeat domain-containing protein 2                      | KINH_HUMAN  | 110 kDa | TRUE | .019434362  | 4.341659233 | 0      | 1.0432 | 2.24    | 6.707   | 4.57    | 6.85    |
| 860 | TRUE | Empty | OS=Homo sapiens GN=KANK2 PE=1 SV=1                                                                                                       | KANK2_HUMAN | ?       | TRUE | .217218164  | INF         | 0      | 0      | 0       | 0       | 0.84713 | 2.94    |
| 861 | TRUE | Empty | Kynureninase OS=Homo sapiens GN=KYNU PE=1 SV=1                                                                                           | KYNU_HUMAN  | ?       |      | 0.114667062 | 2.1         | 0      | 8.54   | 7.97    | 11.178  | 14.401  | 9.78    |
| 862 | TRUE | Empty | Lactotransferrin OS=Homo sapiens GN=LTF PE=1 SV=6                                                                                        | TRFL_HUMAN  | ?       | TRUE | .828998755  | 0.9         | 2.03   | 7.22   | 13.964  | 5.17    | 3.85    | 11.277  |
| 863 | TRUE | Empty | Lactoylglutathione lyase OS=Homo sapiens GN=GLO1 PE=1 SV=4                                                                               | LGUL_HUMAN  | ?       |      | 0.593406265 | 0.8         | 4.06   | 20.863 | 17.954  | 11.178  | 11.013  | 12.217  |
| 864 | TRUE | Empty | Ladinin-1 OS=Homo sapiens GN=LAD1 PE=1 SV=2                                                                                              | LAD1_HUMAN  | 57 kDa  | TRUE | .264095074  | 0.2         | 0      | 3.1295 | 6.22    | 0       | 0       | 1.96    |
| 865 | TRUE | Empty | Lamina-associated polypeptide 2, isoform alpha OS=Homo sapiens GN=TMPO PE=1 SV=2<br>Lamina-associated polypeptide 2, isoforms beta/gamma | LAP2A_HUMAN | 75 kDa  | TRUE | .035125144  | 6.430665672 | 0      | 3.1295 | 0.99746 | 7.22    | 5.99    | 13.157  |
| 866 | TRUE | Empty | OS=Homo sapiens GN=TMPO PE=1 SV=2                                                                                                        | LAP2B_HUMAN | ?       | TRUE | .069935796  | INF         | 0      | 0      | 0       | 5.17    | 0.84713 | 6.85    |
| 867 | TRUE | Empty | Lamin-B1 OS=Homo sapiens GN=LMNB1 PE=1 SV=2                                                                                              | LMNB1_HUMAN | 66 kDa  | TRUE | .764197007  | 0.9         | 6.631  | 32.338 | 32.916  | 17.14   | 26.261  | 19.735  |
| 868 | TRUE | Empty | Lamin-B2 OS=Homo sapiens GN=LMNB2 PE=1 SV=4                                                                                              | LMNB2_HUMAN | 70 kDa  | TRUE | .507417069  | 0.7         | 2.03   | 10.432 | 13.964  | 4.13    | 8.13    | 5.87    |
| 869 | TRUE | Empty | LanC-like protein 1 OS=Homo sapiens GN=LANCL1 PE=1 SV=1                                                                                  | LANC1_HUMAN | 45 kDa  |      | 0.420249734 | 0.4         | 0      | 7.22   | 1.49    | 0.74522 | 1.43    | 0.93978 |
| 870 | TRUE | Empty | Lanosterol synthase OS=Homo sapiens GN=LSS PE=1 SV=1                                                                                     | ERG7_HUMAN  | ?       | TRUE | .071497131  | 5.3         | 2.03   | 2.0863 | 0.99746 | 4.13    | 8.13    | 15.037  |
| 871 | TRUE | Empty | La-related protein 1 OS=Homo sapiens GN=LARP1 PE=1 SV=2<br>Large proline-rich protein BAG6 OS=Homo sapiens GN=BAG6 PE=1 SV=2             | LARP1_HUMAN | ?       | TRUE | .663928764  | 0.7         | 6.631  | 0      | 7.97    | 3.61    | 5.99    | 0.93978 |
| 872 | TRUE | Empty |                                                                                                                                          | BAG6_HUMAN  | ?       |      | 0.097956695 | 1.8         | 4.06   | 1.0432 | 5.47    | 6.707   | 6.71    | 7.83    |
| 873 | TRUE | Empty | Latexin OS=Homo sapiens GN=LXN PE=1 SV=2                                                                                                 | LXN_HUMAN   | 26 kDa  |      | 0.831207279 | 1.1         | 24.314 | 8.54   | 3.98    | 14.159  | 13.554  | 13.157  |
| 874 | TRUE | Empty | LDLR chaperone MESD OS=Homo sapiens GN=MESDC2 PE=1 SV=2                                                                                  | MESD_HUMAN  | ?       |      | 0.136122783 | INF         | 0      | 0      | 0       | 2.09    | 0       | 1.96    |
| 875 | TRUE | Empty | Lethal(2) giant larvae protein homolog 2 OS=Homo sapiens GN=LLGL2 PE=1 SV=2                                                              | L2GL2_HUMAN | ?       | TRUE | .166918615  | 21          | 0      | 0      | 0.99746 | 14.904  | 1.43    | 4.89    |
| 876 | TRUE | Empty | Leucine carboxyl methyltransferase 1 OS=Homo sapiens GN=LCMT1 PE=1 SV=2                                                                  | LCMT1_HUMAN | ?       |      | 0.169759736 | INF         | 0      | 0      | 0       | 0       | 0.84713 | 1.96    |
| 877 | TRUE | Empty | Leucine-rich PPR motif-containing protein, mitochondrial OS=Homo sapiens GN=LRPPRC PE=1 SV=3                                             | LPPRC_HUMAN | 158 kDa | TRUE | .029866352  | 6.453249887 | 6.631  | 0      | 0       | 19.376  | 9.85    | 14.097  |
| 878 | TRUE | Empty | Leucine-rich repeat flightless-interacting protein 1 OS=Homo sapiens GN=LRRFIP1 PE=1 SV=2                                                | LRRF1_HUMAN | ?       | TRUE | 0.46138078  | 0.6         | 0      | 10.432 | 8.71    | 5.65    | 0.84713 | 4.89    |
| 879 | TRUE | Empty | Leucine-rich repeat-containing protein 47 OS=Homo sapiens GN=LRRC47 PE=1 SV=1                                                            | LRC47_HUMAN | 63 kDa  |      | 0.294836952 | 3           | 0      | 0      | 3.98    | 7.22    | 1.43    | 2.94    |
| 880 | TRUE | Empty | Leucine-rich repeat-containing protein 59 OS=Homo sapiens GN=LRRCS9 PE=1 SV=1                                                            | LRC59_HUMAN | 35 kDa  |      | 0.017294729 | 5.595982446 | 4.06   | 0      | 0       | 9.78    | 8.13    | 6.85    |
| 881 | TRUE | Empty | Leucine--tRNA ligase, cytoplasmic OS=Homo sapiens GN=LARS PE=1 SV=2                                                                      | SYLC_HUMAN  | ?       | TRUE | .128315098  | 3.2         | 6.631  | 0      | 0       | 7.22    | 9.85    | 4.89    |
| 882 | TRUE | Empty | Leucyl-cystinyl aminopeptidase OS=Homo sapiens GN=LNPEP PE=1 SV=3                                                                        | LCAP_HUMAN  | ?       | TRUE | .092374389  | 4.7         | 2.03   | 0      | 0       | 1.04    | 4.57    | 4.89    |
| 883 | TRUE | Empty | Leukocyte elastase inhibitor OS=Homo sapiens GN=SERPINB1 PE=1 SV=1                                                                       | ILEU_HUMAN  | ?       | TRUE | 0.06853503  | INF         | 0      | 0      | 0       | 0.74522 | 2.14    | 0.93978 |
| 884 | TRUE | Empty | Leukocyte surface antigen CD47 OS=Homo sapiens GN=CD47 PE=1 SV=1                                                                         | CD47_HUMAN  | ?       |      | 0.373900966 | INF         | 0      | 0      | 0       | 8.74    | 0       | 0       |
| 885 | TRUE | Empty | Leukotriene A-4 hydrolase OS=Homo sapiens GN=LTA4H PE=1 SV=2                                                                             | LKHA4_HUMAN | ?       | TRUE | 0.12446721  | 5.8         | 2.03   | 0      | 0       | 7.22    | 1.43    | 3.91    |

|     |      |       |                                                                                            |              |         |      |             |             |         |         |         |         |         |         |
|-----|------|-------|--------------------------------------------------------------------------------------------|--------------|---------|------|-------------|-------------|---------|---------|---------|---------|---------|---------|
| 886 | TRUE | Empty | LIM and SH3 domain protein 1 OS=Homo sapiens GN=LASP1 PE=1 SV=2                            | LASP1_HUMAN  | ?       |      | 0.371921772 | 0.4         | 0       | 4.1727  | 1.49    | 0.74522 | 0.84713 | 0.93978 |
| 887 | TRUE | Empty | LIM domain and actin-binding protein 1 OS=Homo sapiens GN=LIMA1 PE=1 SV=1                  | LIMA1_HUMAN  | ?       | TRUE | .934110007  | 1.1         | 0       | 2.0863  | 3.98    | 3.61    | 0.84713 | 1.96    |
| 888 | TRUE | Empty | Lipoma-preferred partner OS=Homo sapiens GN=LPP PE=1 SV=1                                  | LPP_HUMAN    | 66 kDa  |      | 0.219562563 | 0.2         | 0       | 3.1295  | 3.98    | 0.74522 | 0       | 0.93978 |
| 889 | TRUE | Empty | L-lactate dehydrogenase A chain OS=Homo sapiens GN=LDHA PE=1 SV=2                          | LDHA_HUMAN   | ?       | TRUE | .627638521  | 1.3         | 61.889  | 2.0863  | 20.947  | 39.497  | 33.885  | 39.471  |
| 890 | TRUE | Empty | Lon protease homolog, mitochondrial OS=Homo sapiens GN=LONP1 PE=1 SV=2                     | LONM_HUMAN   | ?       |      | 0.043065892 | 10.54438273 | 0.99746 | 0       | 0       | 1.04    | 3.85    | 5.87    |
| 891 | TRUE | Empty | Long-chain-fatty-acid--CoA ligase 3 OS=Homo sapiens GN=ACSL3 PE=1 SV=3                     | ACSL3_HUMAN  | 80 kDa  | TRUE | .005539052  | 6.571491589 | 0       | 0.99746 | 0       | 2.09    | 1.43    | 1.96    |
| 892 | TRUE | Empty | Low molecular weight phosphotyrosine protein phosphatase OS=Homo sapiens GN=ACP1 PE=1 SV=3 | PPAC_HUMAN   | ?       | TRUE | .749617151  | 0.9         | 6.631   | 7.22    | 7.97    | 5.65    | 10.166  | 4.89    |
| 893 | TRUE | Empty | Luc7-like protein 3 OS=Homo sapiens GN=LUC7L3 PE=1 SV=2                                    | LC7L3_HUMAN  | ?       | TRUE | .776817561  | 0.8         | 0       | 4.1727  | 6.22    | 2.09    | 2.14    | 3.91    |
| 894 | TRUE | Empty | Lupus La protein OS=Homo sapiens GN=SSB PE=1 SV=2                                          | LA_HUMAN     | 47 kDa  |      | 0.396355964 | 1.5         | 4.06    | 2.0863  | 11.969  | 6.707   | 11.86   | 9.78    |
| 895 | TRUE | Empty | L-xylulose reductase OS=Homo sapiens GN=DCXR PE=1 SV=2                                     | DCXR_HUMAN   | 26 kDa  |      | 0.037589604 | 5.755463957 | 0       | 1.0432  | 0       | 1.04    | 1.43    | 2.94    |
| 896 | TRUE | Empty | Lysine-specific histone demethylase 1A OS=Homo sapiens GN=KDM1A PE=1 SV=2                  | KDM1A_HUMAN  | ?       | TRUE | .034371444  | 12.1316143  | 0       | 0.99746 | 0       | 2.09    | 2.14    | 6.85    |
| 897 | TRUE | Empty | Lysine--tRNA ligase OS=Homo sapiens GN=KARS PE=1 SV=3                                      | SYK_HUMAN    | ?       | TRUE | 0.20079034  | 3.3         | 2.03    | 0       | 3.98    | 6.707   | 11.86   | 1.96    |
| 898 | TRUE | Empty | Lysophosphatidylcholine acyltransferase 1 OS=Homo sapiens GN=LPCAT1 PE=1 SV=2              | PCAT1_HUMAN  | 59 kDa  |      | 0.177767042 | INF         | 0       | 0       | 0       | 2.57    | 0       | 0.93978 |
| 899 | TRUE | Empty | Lysophospholipid acyltransferase 7 OS=Homo sapiens GN=MBOAT7 PE=1 SV=2                     | MBOAT7_HUMAN | ?       |      | 0.794426248 | 0.7         | 15.472  | 0       | 0       | 3.61    | 1.43    | 5.87    |
| 900 | TRUE | Empty | Lysosomal alpha-glucosidase OS=Homo sapiens GN=GAA PE=1 SV=4                               | LYAG_HUMAN   | 105 kDa |      | 0.308046881 | 0.3         | 0       | 18.777  | 10.972  | 1.04    | 5.0828  | 3.91    |
| 901 | TRUE | Empty | Lysosomal alpha-mannosidase OS=Homo sapiens GN=MAN2B1 PE=1 SV=3                            | MA2B1_HUMAN  | ?       |      | 0.664926364 | 0.6         | 0       | 3.1295  | 0.99746 | 0.74522 | 0       | 1.96    |
| 902 | TRUE | Empty | Lysosome-associated membrane glycoprotein 1 OS=Homo sapiens GN=LAMP1 PE=1 SV=3             | LAMP1_HUMAN  | ?       |      | 0.132552182 | INF         | 0       | 0       | 0       | 2.57    | 3.85    | 0       |
| 903 | TRUE | Empty | Lysosome-associated membrane glycoprotein 2 OS=Homo sapiens GN=LAMP2 PE=1 SV=2             | LAMP2_HUMAN  | ?       |      | 0.159551185 | 1.7         | 6.631   | 3.1295  | 1.49    | 5.65    | 6.71    | 8.81    |
| 904 | TRUE | Empty | m7GpppX diphosphatase OS=Homo sapiens GN=DCPS PE=1 SV=2                                    | DCPS_HUMAN   | 39 kDa  |      | 0.056790379 | 5.7         | 0       | 0       | 0.99746 | 2.57    | 2.14    | 0.93978 |
| 905 | TRUE | Empty | Macrophage migration inhibitory factor OS=Homo sapiens GN=MIF PE=1 SV=4                    | MIF_HUMAN    | 12 kDa  |      | 0.326863011 | 0.4         | 8.13    | 129.35  | 70.82   | 23.847  | 31.344  | 36.652  |
| 906 | TRUE | Empty | Macrophage-capping protein OS=Homo sapiens GN=CAPG PE=1 SV=2                               | CAPG_HUMAN   | ?       |      | 0.755173895 | 1.4         | 0       | 0       | 4.73    | 1.04    | 0.84713 | 4.89    |
| 907 | TRUE | Empty | Major vault protein OS=Homo sapiens GN=MVP PE=1 SV=4                                       | MVP_HUMAN    | 99 kDa  | TRUE | .184606477  | INF         | 0       | 0       | 0       | 0.74522 | 0       | 1.96    |
| 908 | TRUE | Empty | Malate dehydrogenase, cytoplasmic OS=Homo sapiens GN=MDH1 PE=1 SV=4                        | MDHC_HUMAN   | ?       |      | 0.349939865 | 0.8         | 13.262  | 15.648  | 9.46    | 13.414  | 9.85    | 9.78    |
| 909 | TRUE | Empty | Malate dehydrogenase, mitochondrial OS=Homo sapiens GN=MDH2 PE=1 SV=3                      | MDHM_HUMAN   | ?       |      | 0.877803289 | 1           | 72.941  | 116.84  | 70.82   | 70.796  | 111.82  | 87.4    |
| 910 | TRUE | Empty | Malectin OS=Homo sapiens GN=MLEC PE=1 SV=1                                                 | MLEC_HUMAN   | 32 kDa  | TRUE | .121392661  | INF         | 0       | 0       | 0       | 2.57    | 0       | 2.94    |
| 911 | TRUE | Empty | Maleylacetoacetate isomerase OS=Homo sapiens GN=GSTZ1 PE=1 SV=3                            | MAAI_HUMAN   | ?       |      | 0.373824557 | 2.7         | 4.06    | 0       | 0       | 5.65    | 6.71    | 0       |
| 912 | TRUE | Empty | Malignant T-cell-amplified sequence 1 OS=Homo sapiens GN=MCTS1 PE=1 SV=1                   | MCTS1_HUMAN  | ?       | TRUE | .754650149  | 0.9         | 2.03    | 10.432  | 10.972  | 10.433  | 5.0828  | 4.89    |

|     |      |       |                                                                                                 |             |        |      |             |             |         |         |         |         |         |         |
|-----|------|-------|-------------------------------------------------------------------------------------------------|-------------|--------|------|-------------|-------------|---------|---------|---------|---------|---------|---------|
| 913 | TRUE | Empty | Manganese-transporting ATPase 13A1 OS=Homo sapiens<br>GN=ATP13A1 PE=1 SV=2                      | AT131_HUMAN | ?      | TRUE | .030400164  | 5.179375614 | 0.99746 | 0       | 0       | 0.74522 | 2.14    | 1.96    |
| 914 | TRUE | Empty | Mannose-1-phosphate guanyltransferase alpha OS=Homo sapiens<br>GN=GMPPA PE=1 SV=1               | GMPPA_HUMAN | ?      |      | 0.201105011 | 2.2         | 2.03    | 1.0432  | 0.99746 | 1.04    | 5.0828  | 2.94    |
| 915 | TRUE | Empty | Mannosyl-oligosaccharide glucosidase OS=Homo sapiens<br>GN=MOGS PE=1 SV=5                       | MOGS_HUMAN  | ?      | TRUE | .064585291  | INF         | 0       | 0       | 0       | 0.74522 | 5.0828  | 4.89    |
| 916 | TRUE | Empty | Matrin-3 OS=Homo sapiens GN=MATR3 PE=1 SV=2                                                     | MATR3_HUMAN | ?      |      | 0.449446767 | 1.1         | 19.893  | 33.382  | 32.916  | 35.025  | 35.58   | 28.194  |
| 917 | TRUE | Empty | Melanophilin OS=Homo sapiens GN=MLPH PE=1 SV=1                                                  | MELPH_HUMAN | ?      | TRUE | .091068278  | 0.08        | 2.03    | 11.475  | 5.47    | 1.04    | 0       | 0       |
| 918 | TRUE | Empty | Membrane-associated progesterone receptor component 2<br>OS=Homo sapiens GN=PGRMC2 PE=1 SV=1    | PGRC2_HUMAN | ?      | TRUE | .337215899  | 2.2         | 8.13    | 0       | 0       | 5.17    | 8.13    | 4.89    |
| 919 | TRUE | Empty | Mesencephalic astrocyte-derived neurotrophic factor OS=Homo<br>sapiens GN=MANF PE=1 SV=3        | MANF_HUMAN  | 21 kDa |      | 0.15359     | 0           | 0       | 1.0432  | 1.49    | 0       | 0       | 0       |
| 920 | TRUE | Empty | Metalloproteinase inhibitor 3 OS=Homo sapiens GN=TIMP3 PE=1<br>SV=2                             | TIMP3_HUMAN | 24 kDa | TRUE | 0.15359     | 0           | 0       | 1.0432  | 1.49    | 0       | 0       | 0       |
| 921 | TRUE | Empty | Metastasis-associated protein MTA1 OS=Homo sapiens GN=MTA1<br>PE=1 SV=2                         | MTA1_HUMAN  | ?      | TRUE | .017663121  | 3.387905279 | 0       | 0.99746 | 0       | 0.74522 | 1.43    | 0.93978 |
| 922 | TRUE | Empty | Methionine adenosyltransferase 2 subunit beta OS=Homo sapiens<br>GN=MAT2B PE=1 SV=1             | MAT2B_HUMAN | ?      |      | 0.82088714  | 1.1         | 0       | 4.1727  | 2.24    | 3.61    | 2.14    | 1.96    |
| 923 | TRUE | Empty | Methionine aminopeptidase 1 OS=Homo sapiens GN=METAP1<br>PE=1 SV=2                              | MAP11_HUMAN | 43 kDa |      | 0.62105497  | 0.7         | 0       | 8.54    | 7.97    | 6.707   | 4.57    | 0       |
| 924 | TRUE | Empty | Methionine aminopeptidase 2 OS=Homo sapiens GN=METAP2<br>PE=1 SV=1                              | MAP2_HUMAN  | ?      | TRUE | .699734897  | 1.9         | 0       | 0       | 1.49    | 0       | 0       | 3.91    |
| 925 | TRUE | Empty | Methionine--tRNA ligase, cytoplasmic OS=Homo sapiens<br>GN=MARS PE=1 SV=2                       | SYMC_HUMAN  | ?      | TRUE | .102840484  | 7.4         | 0       | 0       | 0.99746 | 2.57    | 4.57    | 0.93978 |
| 926 | TRUE | Empty | Methylated-DNA--protein-cysteine methyltransferase OS=Homo<br>sapiens GN=MGMT PE=1 SV=1         | MGMT_HUMAN  | 22 kDa |      | 0.331247655 | 0.2         | 0       | 1.0432  | 3.98    | 0       | 0       | 0.93978 |
| 927 | TRUE | Empty | Methyl-CpG-binding domain protein 3 OS=Homo sapiens<br>GN=MBD3 PE=1 SV=1                        | MBD3_HUMAN  | ?      | TRUE | .373900966  | INF         | 0       | 0       | 0       | 0       | 0       | 1.96    |
| 928 | TRUE | Empty | Methylcrotonoyl-CoA carboxylase beta chain, mitochondrial<br>OS=Homo sapiens GN=MCCC2 PE=1 SV=1 | MCCB_HUMAN  | ?      | TRUE | .001800746  | 15.33364746 | 0       | 0.99746 | 0       | 3.61    | 5.99    | 5.87    |
| 929 | TRUE | Empty | Methylosome protein 50 OS=Homo sapiens GN=WDR77 PE=1<br>SV=1                                    | MEP50_HUMAN | ?      |      | 0.32385374  | 2.4         | 0       | 3.1295  | 4.73    | 4.13    | 2.14    | 12.217  |
| 930 | TRUE | Empty | Methylthioribose-1-phosphate isomerase OS=Homo sapiens<br>GN=MRI1 PE=1 SV=1                     | MTNA_HUMAN  | ?      |      | 0.34494292  | 2.4         | 2.03    | 0       | 0       | 0.74522 | 1.43    | 2.94    |
| 931 | TRUE | Empty | Mevalonate kinase OS=Homo sapiens GN=MVK PE=1 SV=1                                              | KIME_HUMAN  | 42 kDa |      | 0.571575755 | 1.6         | 0       | 0       | 1.49    | 1.04    | 0.84713 | 0.93978 |
| 932 | TRUE | Empty | MICOS complex subunit MIC19 OS=Homo sapiens GN=CHCHD3<br>PE=1 SV=1                              | MIC19_HUMAN | 26 kDa |      | 0.922942221 | 1.1         | 2.03    | 3.1295  | 2.24    | 8.74    | 0       | 0.93978 |
| 933 | TRUE | Empty | MICOS complex subunit MIC60 OS=Homo sapiens GN=IMMT PE=1<br>SV=1                                | MIC60_HUMAN | ?      | TRUE | .012256656  | 6.743654708 | 2.03    | 0       | 0       | 5.65    | 5.99    | 3.91    |
| 934 | TRUE | Empty | Microsomal glutathione S-transferase 1 OS=Homo sapiens<br>GN=MGST1 PE=1 SV=1                    | MGST1_HUMAN | ?      |      | 0.064408264 | INF         | 0       | 0       | 0       | 1.04    | 4.57    | 7.83    |
| 935 | TRUE | Empty | Microtubule-associated protein 4 OS=Homo sapiens GN=MAP4<br>PE=1 SV=3                           | MAP4_HUMAN  | ?      | TRUE | .778794658  | 0.8         | 0       | 8.54    | 2.24    | 1.04    | 1.43    | 5.87    |
| 936 | TRUE | Empty | Microtubule-associated protein RP/EB family member 1<br>OS=Homo sapiens GN=MAPRE1 PE=1 SV=3     | MARE1_HUMAN | 30 kDa | TRUE | .741285641  | 1.3         | 0       | 1.0432  | 3.98    | 2.09    | 2.14    | 0.93978 |
| 937 | TRUE | Empty | Mitogen-activated protein kinase 14 OS=Homo sapiens<br>GN=MAPK14 PE=1 SV=3                      | MK14_HUMAN  | ?      | TRUE | 0.07687344  | INF         | 0       | 0       | 0       | 4.13    | 0.84713 | 6.85    |
| 938 | TRUE | Empty | Mitogen-activated protein kinase 3 OS=Homo sapiens GN=MAPK3<br>PE=1 SV=4                        | MK03_HUMAN  | ?      | TRUE | .122043508  | 5.2         | 0       | 0       | 1.49    | 5.17    | 2.14    | 1.96    |
| 939 | TRUE | Empty | Mitochondrial 2-oxoglutarate/malate carrier protein OS=Homo<br>sapiens GN=SLC25A11 PE=1 SV=3    | M2OM_HUMAN  | ?      |      | 0.041547618 | 5.170061957 | 0.99746 | 0       | 0       | 1.04    | 0.84713 | 2.94    |
| 940 | TRUE | Empty | Mitochondrial antiviral-signaling protein OS=Homo sapiens<br>GN=MAVS PE=1 SV=2                  | MAVS_HUMAN  | ?      |      | 0.220019143 | INF         | 0       | 0       | 0       | 0.74522 | 2.14    | 0       |

|     |      |       |                                                                                                    |              |         |      |             |             |         |         |         |         |         |         |
|-----|------|-------|----------------------------------------------------------------------------------------------------|--------------|---------|------|-------------|-------------|---------|---------|---------|---------|---------|---------|
| 941 | TRUE | Empty | Mitochondrial carrier homolog 2 OS=Homo sapiens GN=MTCH2 PE=1 SV=1                                 | MTCH2_HUMAN  | 33 kDa  |      | 0.019977028 | 18.26248672 | 0       | 0.99746 | 0       | 2.09    | 6.71    | 8.81    |
| 942 | TRUE | Empty | Mitochondrial dicarboxylate carrier OS=Homo sapiens GN=SLC25A10 PE=1 SV=2                          | DIC_HUMAN    | ?       | TRUE | .005353347  | 7.522908187 | 0       | 0       | 0.99746 | 2.57    | 3.85    | 1.96    |
| 943 | TRUE | Empty | Mitochondrial fission 1 protein OS=Homo sapiens GN=FIS1 PE=1 SV=2                                  | FIS1_HUMAN   | 17 kDa  |      | 0.445736559 | 0.7         | 4.06    | 7.22    | 12.967  | 6.707   | 5.99    | 5.87    |
| 944 | TRUE | Empty | Mitochondrial import inner membrane translocase subunit Tim13 OS=Homo sapiens GN=TIMM13 PE=1 SV=1  | TIM13_HUMAN  | 11 kDa  |      | 0.734949237 | 1.2         | 0       | 3.1295  | 4.73    | 4.13    | 2.14    | 2.94    |
| 945 | TRUE | Empty | Mitochondrial import inner membrane translocase subunit TIM50 OS=Homo sapiens GN=TIMM50 PE=1 SV=2  | TIM50_HUMAN  | ?       |      | 0.642280054 | 1.5         | 4.06    | 0       | 0       | 2.57    | 2.14    | 1.96    |
| 946 | TRUE | Empty | Mitochondrial import inner membrane translocase subunit Tim8 A OS=Homo sapiens GN=TIMM8A PE=1 SV=1 | TIM8A_HUMAN  | 11 kDa  |      | 0.715736046 | 0.7         | 0       | 8.54    | 2.24    | 1.04    | 0.84713 | 5.87    |
| 947 | TRUE | Empty | Mitochondrial import receptor subunit TOM22 homolog OS=Homo sapiens GN=TOMM22 PE=1 SV=3            | TOM22_HUMAN  | 16 kDa  |      | 0.911150022 | 1           | 4.06    | 3.1295  | 1.49    | 4.13    | 0.84713 | 3.91    |
| 948 | TRUE | Empty | Mitochondrial import receptor subunit TOM34 OS=Homo sapiens GN=TOMM34 PE=1 SV=2                    | TOM34_HUMAN  | 35 kDa  |      | 0.664294556 | 0.7         | 0       | 7.22    | 1.49    | 0.74522 | 2.14    | 2.94    |
| 949 | TRUE | Empty | Mitochondrial import receptor subunit TOM40 homolog OS=Homo sapiens GN=TOMM40 PE=1 SV=1            | TOM40_HUMAN  | ?       |      | 0.171563696 | INF         | 0       | 0       | 0       | 0.74522 | 1.43    | 6.85    |
| 950 | TRUE | Empty | Mitochondrial import receptor subunit TOM70 OS=Homo sapiens GN=TOMM70A PE=1 SV=1                   | TOM70_HUMAN  | 67 kDa  |      | 0.043064785 | 5.272311672 | 0       | 0.99746 | 0       | 0.74522 | 1.43    | 2.94    |
| 951 | TRUE | Empty | Mitochondrial-processing peptidase subunit alpha OS=Homo sapiens GN=PMPCA PE=1 SV=2                | MPPA_HUMAN   | ?       |      | 0.564332138 | 1.9         | 2.03    | 0       | 0       | 2.57    | 0       | 1.96    |
| 952 | TRUE | Empty | Mitotic checkpoint protein BUB3 OS=Homo sapiens GN=BUB3 PE=1 SV=1                                  | BUB3_HUMAN   | ?       | TRUE | .109007107  | 2.4         | 2.03    | 1.0432  | 0.99746 | 2.57    | 5.0828  | 2.94    |
| 953 | TRUE | Empty | Mitotic-spindle organizing protein 2B OS=Homo sapiens GN=MZT2B PE=1 SV=1                           | MZT2B_HUMAN  | 16 kDa  | TRUE | .341617822  | 0.4         | 0       | 5.59    | 2.24    | 1.04    | 0.84713 | 0.93978 |
| 954 | TRUE | Empty | MMS19 nucleotide excision repair protein homolog OS=Homo sapiens GN=MMS19 PE=1 SV=2                | MMS19_HUMAN  | ?       | TRUE | .004145238  | 11.65791109 | 0.99746 | 0       | 0       | 3.61    | 5.0828  | 2.94    |
| 955 | TRUE | Empty | Monoglyceride lipase OS=Homo sapiens GN=MGLL PE=1 SV=2                                             | MGLL_HUMAN   | ?       |      | 0.724984579 | 0.6         | 0       | 0       | 2.24    | 0       | 1.43    | 0       |
| 956 | TRUE | Empty | mRNA cap guanine-N7 methyltransferase OS=Homo sapiens GN=RNMT PE=1 SV=1                            | MCES_HUMAN   | ?       |      | 0.373900966 | INF         | 0       | 0       | 0       | 1.04    | 0       | 0       |
| 957 | TRUE | Empty | mRNA export factor OS=Homo sapiens GN=RAE1 PE=1 SV=1                                               | RAE1L_HUMAN  | 41 kDa  |      | 0.696449592 | 1.2         | 0       | 6.259   | 6.22    | 3.61    | 5.99    | 6.85    |
| 958 | TRUE | Empty | Mucin-5AC OS=Homo sapiens GN=MUC5AC PE=1 SV=4                                                      | MUC5A_HUMAN  | 586 kDa | TRUE | .000408349  | 3.897928144 | 6.631   | 4.1727  | 3.98    | 18.63   | 21.178  | 17.856  |
| 959 | TRUE | Empty | Mucin-5B OS=Homo sapiens GN=MUC5B PE=1 SV=3                                                        | MUC5B_HUMAN  | 596 kDa | TRUE | 0.20307663  | 5.4         | 0       | 0       | 0.99746 | 0       | 2.14    | 2.94    |
| 960 | TRUE | Empty | Multifunctional methyltransferase subunit TRM112-like protein OS=Homo sapiens GN=TRMT112 PE=1 SV=1 | TR112_HUMAN  | ?       |      | 0.889953256 | 1.1         | 0       | 2.0863  | 0.99746 | 0.74522 | 1.43    | 0.93978 |
| 961 | TRUE | Empty | Multifunctional protein ADE2 OS=Homo sapiens GN=PAICS PE=1 SV=3                                    | PUR6_HUMAN   | ?       | TRUE | 0.06781201  | 3           | 0       | 3.1295  | 5.47    | 12.669  | 8.13    | 6.85    |
| 962 | TRUE | Empty | Multiple myeloma tumor-associated protein 2 OS=Homo sapiens GN=MMTAG2 PE=1 SV=1                    | MMTAG2_HUMAN | ?       | TRUE | .699728631  | 1.9         | 0       | 0       | 0.99746 | 0       | 0       | 1.96    |
| 963 | TRUE | Empty | Muscleblind-like protein 1 OS=Homo sapiens GN=MBNL1 PE=1 SV=2                                      | MBNL1_HUMAN  | ?       | TRUE | .336428859  | 0.4         | 0       | 4.1727  | 2.24    | 0       | 0.84713 | 1.96    |
| 964 | TRUE | Empty | Muscleblind-like protein 2 OS=Homo sapiens GN=MBNL2 PE=1 SV=2                                      | MBNL2_HUMAN  | ?       | TRUE | .304738405  | 0.3         | 0       | 4.1727  | 1.49    | 0       | 0.84713 | 0.93978 |
| 965 | TRUE | Empty | Myb-binding protein 1A OS=Homo sapiens GN=MYBBP1A PE=1 SV=2                                        | MBB1A_HUMAN  | ?       |      | 0.06853503  | INF         | 0       | 0       | 0       | 0.74522 | 2.14    | 0.93978 |
| 966 | TRUE | Empty | Myelin expression factor 2 OS=Homo sapiens GN=MYEF2 PE=1 SV=3                                      | MYEF2_HUMAN  | ?       | TRUE | .867329491  | 0.9         | 0       | 1.0432  | 1.49    | 0       | 1.43    | 0.93978 |
| 967 | TRUE | Empty | Myeloid-derived growth factor OS=Homo sapiens GN=MYDGF PE=1 SV=1                                   | MYDGF_HUMAN  | 19 kDa  | TRUE | 0.53228718  | 1.9         | 0       | 5.59    | 0       | 2.09    | 5.99    | 0.93978 |
| 968 | TRUE | Empty | Myoferlin OS=Homo sapiens GN=MYOF PE=1 SV=1                                                        | MYOF_HUMAN   | ?       | TRUE | .015463896  | 6.924766429 | 4.06    | 0       | 0.99746 | 11.178  | 16.943  | 9.78    |

|     |      |       |                                                                                                                   |             |        |      |             |             |         |         |         |         |         |         |
|-----|------|-------|-------------------------------------------------------------------------------------------------------------------|-------------|--------|------|-------------|-------------|---------|---------|---------|---------|---------|---------|
| 969 | TRUE | Empty | Myoglobin OS=Homo sapiens GN=MB PE=1 SV=2                                                                         | MYG_HUMAN   | 17 kDa |      | 0.485767229 | 0.4         | 0       | 5.59    | 0.99746 | 0.74522 | 0.84713 | 0.93978 |
| 970 | TRUE | Empty | Myosin light polypeptide 6 OS=Homo sapiens GN=MYL6 PE=1 SV=2                                                      | MYL6_HUMAN  | ?      | TRUE | .188235244  | 0.7         | 44.206  | 51.115  | 81.792  | 33.535  | 45.745  | 40.411  |
| 971 | TRUE | Empty | Myosin regulatory light chain 12B OS=Homo sapiens GN=MYL12B PE=1 SV=2                                             | ML12B_HUMAN | 20 kDa |      | 0.362589523 | 0.5         | 6.631   | 17.734  | 39.898  | 14.904  | 11.013  | 7.83    |
| 972 | TRUE | Empty | Myosin-10 OS=Homo sapiens GN=MYH10 PE=1 SV=3                                                                      | MYH10_HUMAN | ?      | TRUE | .159157955  | 3           | 8.13    | 2.0863  | 4.73    | 27.573  | 7.42    | 13.157  |
| 973 | TRUE | Empty | Myosin-14 OS=Homo sapiens GN=MYH14 PE=1 SV=2                                                                      | MYH14_HUMAN | ?      | TRUE | .108512691  | 3           | 28.734  | 4.1727  | 8.71    | 55.891  | 19.484  | 50.748  |
| 974 | TRUE | Empty | Myosin-9 OS=Homo sapiens GN=MYH9 PE=1 SV=4                                                                        | MYH9_HUMAN  | ?      | TRUE | .409542825  | 1.7         | 101.67  | 5.59    | 18.952  | 78.248  | 53.369  | 80.821  |
| 975 | TRUE | Empty | Myotrophin OS=Homo sapiens GN=MTPN PE=1 SV=2                                                                      | MTPN_HUMAN  | 13 kDa |      | 0.259791678 | 1.7         | 2.03    | 2.0863  | 2.24    | 5.17    | 4.57    | 1.96    |
| 976 | TRUE | Empty | Myotubularin-related protein 14 OS=Homo sapiens GN=MTMR14 PE=1 SV=2                                               | MTMRE_HUMAN | ?      | TRUE | .189953018  | INF         | 0       | 0       | 0       | 2.57    | 0.84713 | 0       |
| 977 | TRUE | Empty | Myristoylated alanine-rich C-kinase substrate OS=Homo sapiens GN=MARCKS PE=1 SV=4                                 | MARCS_HUMAN | 32 kDa |      | 0.041547618 | 5.170061957 | 0       | 0       | 0.99746 | 1.04    | 0.84713 | 2.94    |
| 978 | TRUE | Empty | N(G),N(G)-dimethylarginine dimethylaminohydrolase 2 OS=Homo sapiens GN=DDAH2 PE=1 SV=1                            | DDAH2_HUMAN | 30 kDa | TRUE | .490425624  | 0.6         | 0       | 5.59    | 5.47    | 2.09    | 0.84713 | 2.94    |
| 979 | TRUE | Empty | Na(+)/H(+) exchange regulatory cofactor NHE-RF1 OS=Homo sapiens GN=SLC9A3R1 PE=1 SV=4                             | NHRF1_HUMAN | ?      | TRUE | .244573065  | 0.5         | 11.052  | 27.122  | 46.881  | 16.395  | 11.86   | 14.097  |
| 980 | TRUE | Empty | Na(+)/H(+) exchange regulatory cofactor NHE-RF2 OS=Homo sapiens GN=SLC9A3R2 PE=1 SV=2                             | NHRF2_HUMAN | ?      |      | 0.540731665 | 0.3         | 0       | 5.59    | 0       | 0.74522 | 0       | 0.93978 |
| 981 | TRUE | Empty | N-acetyl-D-glucosamine kinase OS=Homo sapiens GN=NAGK PE=1 SV=4                                                   | NAGK_HUMAN  | ?      |      | 0.306830256 | 0.6         | 4.06    | 10.432  | 10.972  | 8.26    | 4.57    | 2.94    |
| 982 | TRUE | Empty | N-acetylglucosamine-6-sulfatase OS=Homo sapiens GN=GNS PE=1 SV=3                                                  | GNS_HUMAN   | ?      |      | 0.919600883 | 0.9         | 0       | 5.59    | 4.73    | 1.04    | 3.85    | 4.89    |
| 983 | TRUE | Empty | N-acetylserotonin O-methyltransferase-like protein OS=Homo sapiens GN=ASMTL PE=1 SV=3                             | ASML_HUMAN  | ?      |      | 0.123359563 | 3           | 2.03    | 0       | 0       | 2.57    | 2.14    | 1.96    |
| 984 | TRUE | Empty | NAD(P)H dehydrogenase [quinone] 1 OS=Homo sapiens GN=NQO1 PE=1 SV=1                                               | NQO1_HUMAN  | ?      |      | 0.01397539  | 21.53910934 | 0       | 0       | 0.99746 | 5.65    | 5.99    | 10.338  |
| 985 | TRUE | Empty | NAD(P)H-hydrate epimerase OS=Homo sapiens GN=APOA1BP PE=1 SV=2                                                    | NNRE_HUMAN  | ?      |      | 0.892714961 | 1.1         | 0       | 3.1295  | 3.98    | 0.74522 | 4.57    | 2.94    |
| 986 | TRUE | Empty | NADH dehydrogenase [ubiquinone] 1 alpha subcomplex subunit 10, mitochondrial OS=Homo sapiens GN=NDUFA10 PE=1 SV=1 | NDUAA_HUMAN | ?      |      | 0.00025994  | 5.824393961 | 0       | 0.99746 | 0       | 2.57    | 1.43    | 1.96    |
| 987 | TRUE | Empty | NADH dehydrogenase [ubiquinone] 1 alpha subcomplex subunit 5 OS=Homo sapiens GN=NDUFA5 PE=1 SV=3                  | NDUA5_HUMAN | ?      |      | 0.005539052 | 6.571491589 | 0       | 0       | 0.99746 | 2.09    | 1.43    | 1.96    |
| 988 | TRUE | Empty | NADH dehydrogenase [ubiquinone] 1 alpha subcomplex subunit 8 OS=Homo sapiens GN=NDUFA8 PE=1 SV=3                  | NDUA8_HUMAN | 20 kDa |      | 0.612541843 | 1.6         | 0       | 2.0863  | 0       | 1.04    | 0.84713 | 0.93978 |
| 989 | TRUE | Empty | NADH dehydrogenase [ubiquinone] 1 alpha subcomplex subunit 9, mitochondrial OS=Homo sapiens GN=NDUFA9 PE=1 SV=2   | NDUA9_HUMAN | 43 kDa |      | 0.063218814 | INF         | 0       | 0       | 0       | 2.09    | 0.84713 | 4.89    |
| 990 | TRUE | Empty | NADH dehydrogenase [ubiquinone] 1 beta subcomplex subunit 10 OS=Homo sapiens GN=NDUFB10 PE=1 SV=3                 | NDUBA_HUMAN | ?      |      | 0.405649664 | 3           | 2.03    | 4.1727  | 2.24    | 22.357  | 2.14    | 2.94    |
| 991 | TRUE | Empty | NADH dehydrogenase [ubiquinone] flavoprotein 2, mitochondrial OS=Homo sapiens GN=NDUFV2 PE=1 SV=2                 | NDUV2_HUMAN | 27 kDa |      | 0.028435388 | 7.379505368 | 0       | 1.0432  | 0       | 1.04    | 3.85    | 2.94    |
| 992 | TRUE | Empty | NADH dehydrogenase [ubiquinone] iron-sulfur protein 8, mitochondrial OS=Homo sapiens GN=NDUFS8 PE=1 SV=1          | NDUS8_HUMAN | 24 kDa |      | 0.111295643 | 3.4         | 2.03    | 0       | 0       | 2.57    | 3.85    | 1.96    |
| 993 | TRUE | Empty | NADH-cytochrome b5 reductase 1 OS=Homo sapiens GN=CYB5R1 PE=1 SV=1                                                | NB5R1_HUMAN | 34 kDa | TRUE | .257234701  | 2.6         | 2.03    | 0       | 0       | 2.57    | 2.14    | 0.93978 |
| 994 | TRUE | Empty | NADH-cytochrome b5 reductase 3 OS=Homo sapiens GN=CYB5R3 PE=1 SV=3                                                | NB5R3_HUMAN | ?      | TRUE | .009521936  | 4.227868787 | 0.99746 | 0       | 0       | 1.04    | 0.84713 | 1.96    |
| 995 | TRUE | Empty | NADH-ubiquinone oxidoreductase 75 kDa subunit, mitochondrial OS=Homo sapiens GN=NDUFS1 PE=1 SV=3                  | NDUS1_HUMAN | ?      |      | 0.005921119 | 6.873637063 | 2.03    | 0       | 0       | 4.13    | 5.0828  | 5.87    |
| 996 | TRUE | Empty | NADP-dependent malic enzyme OS=Homo sapiens GN=ME1 PE=1 SV=1                                                      | MAOX_HUMAN  | ?      | TRUE | .366913381  | 0.4         | 0       | 5.59    | 4.73    | 0       | 0       | 3.91    |

|      |      |       |                                                                                                              |             |         |      |             |             |         |         |         |         |         |         |
|------|------|-------|--------------------------------------------------------------------------------------------------------------|-------------|---------|------|-------------|-------------|---------|---------|---------|---------|---------|---------|
| 997  | TRUE | Empty | NADPH:adrenodoxin oxidoreductase, mitochondrial OS=Homo sapiens GN=FDXR PE=1 SV=3                            | ADRO_HUMAN  | ?       | TRUE | .025516134  | 6.47853548  | 0       | 0.99746 | 0       | 2.09    | 2.14    | 0.93978 |
| 998  | TRUE | Empty | NADPH--cytochrome P450 reductase OS=Homo sapiens GN=POR PE=1 SV=2                                            | NCPR_HUMAN  | 77 kDa  |      | 0.041670966 | 27.09943256 | 0       | 0       | 0.99746 | 5.65    | 6.71    | 15.037  |
| 999  | TRUE | Empty | N-alpha-acetyltransferase 10 OS=Homo sapiens GN=NAA10 PE=1 SV=1                                              | NAA10_HUMAN | ?       | TRUE | .693507807  | 1.6         | 0       | 0       | 1.49    | 2.57    | 0       | 0.93978 |
| 1000 | TRUE | Empty | N-alpha-acetyltransferase 15, NatA auxiliary subunit OS=Homo sapiens GN=NAA15 PE=1 SV=1                      | NAA15_HUMAN | ?       | TRUE | .782182663  | 1.4         | 2.03    | 0       | 0       | 2.57    | 0.84713 | 0       |
| 1001 | TRUE | Empty | N-alpha-acetyltransferase 50 OS=Homo sapiens GN=NAA50 PE=1 SV=1                                              | NAA50_HUMAN | ?       |      | 0.023730014 | 6.571491589 | 0       | 0       | 0.99746 | 2.09    | 1.43    | 1.96    |
| 1002 | TRUE | Empty | Nascent polypeptide-associated complex subunit alpha, muscle-specific form OS=Homo sapiens GN=NACA PE=1 SV=1 | NACAM_HUMAN | ?       | TRUE | .391425709  | 0.8         | 13.262  | 31.295  | 28.926  | 17.885  | 19.484  | 19.735  |
| 1003 | TRUE | Empty | Nck-associated protein 1 OS=Homo sapiens GN=NCKAP1 PE=1 SV=1                                                 | NCKP1_HUMAN | ?       | TRUE | .140218517  | INF         | 0       | 0       | 0       | 0       | 1.43    | 2.94    |
| 1004 | TRUE | Empty | NEDD8-activating enzyme E1 catalytic subunit OS=Homo sapiens GN=UBA3 PE=1 SV=2                               | UBA3_HUMAN  | ?       |      | 0.147672906 | INF         | 0       | 0       | 0       | 0       | 1.43    | 0.93978 |
| 1005 | TRUE | Empty | NEDD8-conjugating enzyme Ubc12 OS=Homo sapiens GN=UBE2M PE=1 SV=1                                            | UBC12_HUMAN | 21 kDa  | TRUE | .894417051  | 0.9         | 6.631   | 2.0863  | 1.49    | 2.09    | 4.57    | 2.94    |
| 1006 | TRUE | Empty | Negative elongation factor B OS=Homo sapiens GN=NELFB PE=1 SV=1                                              | NELFB_HUMAN | 66 kDa  | TRUE | 0.03308591  | 6.961482165 | 0       | 0.99746 | 0       | 1.04    | 1.43    | 3.91    |
| 1007 | TRUE | Empty | Negative elongation factor C/D OS=Homo sapiens GN=NELFCD PE=1 SV=2                                           | NELFD_HUMAN | ?       |      | 0.250318529 | INF         | 0       | 0       | 0       | 0       | 4.57    | 0.93978 |
| 1008 | TRUE | Empty | Nesprin-2 OS=Homo sapiens GN=SYNE2 PE=1 SV=3                                                                 | SYNE2_HUMAN | ?       | TRUE | .388590446  | 3           | 0       | 1.0432  | 0       | 2.57    | 0       | 0.93978 |
| 1009 | TRUE | Empty | Neuroblast differentiation-associated protein AHNK OS=Homo sapiens GN=AHNAK PE=1 SV=2                        | AHNK_HUMAN  | ?       | TRUE | .306890307  | 0.5         | 11.052  | 197.16  | 175.55  | 61.108  | 38.968  | 74.243  |
| 1010 | TRUE | Empty | Neurochondrin OS=Homo sapiens GN=NCDN PE=1 SV=1                                                              | NCDN_HUMAN  | ?       |      | 0.080922552 | INF         | 0       | 0       | 0       | 0.74522 | 1.43    | 3.91    |
| 1011 | TRUE | Empty | Neuronal cell adhesion molecule OS=Homo sapiens GN=NRCAM PE=1 SV=3                                           | NRCAM_HUMAN | ?       | TRUE | .228035754  | 0           | 0       | 14.604  | 3.98    | 0       | 0       | 0       |
| 1012 | TRUE | Empty | Neutral alpha-glucosidase AB OS=Homo sapiens GN=GANAB PE=1 SV=3                                              | GANAB_HUMAN | ?       |      | 0.454141594 | 1.8         | 37.575  | 2.0863  | 0.99746 | 29.064  | 15.248  | 28.194  |
| 1013 | TRUE | Empty | Neutral amino acid transporter B(0) OS=Homo sapiens GN=SLC1A5 PE=1 SV=2                                      | AAAT_HUMAN  | ?       |      | 0.014795304 | 4.798428497 | 4.06    | 3.1295  | 1.49    | 10.433  | 20.331  | 15.037  |
| 1014 | TRUE | Empty | NF-kappa-B essential modulator OS=Homo sapiens GN=IKBKG PE=1 SV=2                                            | NEMO_HUMAN  | ?       | TRUE | 0.2341866   | 0.2         | 0       | 4.1727  | 1.49    | 0       | 0       | 0.93978 |
| 1015 | TRUE | Empty | NHP2-like protein 1 OS=Homo sapiens GN=SNU13 PE=1 SV=3                                                       | NH2L1_HUMAN | 14 kDa  |      | 0.751566327 | 1.2         | 0       | 9.86    | 9.46    | 8.74    | 2.14    | 13.157  |
| 1016 | TRUE | Empty | Niban-like protein 1 OS=Homo sapiens GN=FAM129B PE=1 SV=3                                                    | NIBL1_HUMAN | ?       |      | 0.001659387 | 9.831750423 | 2.03    | 1.0432  | 0       | 8.26    | 12.707  | 10.338  |
| 1017 | TRUE | Empty | Nicotinamide phosphoribosyltransferase OS=Homo sapiens GN=NAMPT PE=1 SV=1                                    | NAMPT_HUMAN | 56 kDa  | TRUE | .001501257  | 11.94584244 | 0       | 0       | 0.99746 | 2.09    | 4.57    | 4.89    |
| 1018 | TRUE | Empty | Nicotinate phosphoribosyltransferase OS=Homo sapiens GN=NAPRT PE=1 SV=2                                      | PNCB_HUMAN  | ?       | TRUE | .189605526  | 0.1         | 0       | 5.59    | 8.71    | 0       | 0.84713 | 0.93978 |
| 1019 | TRUE | Empty | NIF3-like protein 1 OS=Homo sapiens GN=NIF3L1 PE=1 SV=2                                                      | NIF3L_HUMAN | ?       | TRUE | .506553997  | 0.2         | 0       | 0       | 2.24    | 0.74522 | 0       | 0       |
| 1020 | TRUE | Empty | Nitric oxide synthase-interacting protein OS=Homo sapiens GN=NOSIP PE=1 SV=1                                 | NOSIP_HUMAN | 33 kDa  |      | 0.67700455  | 0.7         | 0       | 5.59    | 4.73    | 5.17    | 0.84713 | 0       |
| 1021 | TRUE | Empty | Nodal modulator 1 OS=Homo sapiens GN=NOMO1 PE=1 SV=5                                                         | NOMO1_HUMAN | 134 kDa |      | 0.043064785 | 5.272311672 | 0.99746 | 0       | 0       | 0.74522 | 1.43    | 2.94    |
| 1022 | TRUE | Empty | Non-POU domain-containing octamer-binding protein OS=Homo sapiens GN=NONO PE=1 SV=4                          | NONO_HUMAN  | ?       | TRUE | .837073983  | 1.1         | 15.472  | 18.777  | 7.97    | 14.904  | 11.86   | 17.856  |
| 1023 | TRUE | Empty | Non-specific lipid-transfer protein OS=Homo sapiens GN=SCP2 PE=1 SV=2                                        | NLTP_HUMAN  | ?       |      | 0.92145333  | 1.1         | 0       | 11.475  | 7.97    | 5.65    | 4.57    | 11.277  |

|      |      |       |                                                                                |              |         |      |             |             |         |         |         |         |         |         |
|------|------|-------|--------------------------------------------------------------------------------|--------------|---------|------|-------------|-------------|---------|---------|---------|---------|---------|---------|
| 1024 | TRUE | Empty | Notchless protein homolog 1 OS=Homo sapiens GN=NLE1 PE=1 SV=4                  | NLE1_HUMAN   | ?       |      | 0.303239214 | 0.3         | 0       | 3.1295  | 2.24    | 0       | 0       | 1.96    |
| 1025 | TRUE | Empty | NSFL1 cofactor p47 OS=Homo sapiens GN=NSFL1C PE=1 SV=2                         | NSFL1C_HUMAN | ?       | TRUE | .298120696  | 2.3         | 0       | 0       | 2.24    | 1.04    | 2.14    | 2.94    |
| 1026 | TRUE | Empty | N-sulphoglucosamine sulphohydrolase OS=Homo sapiens GN=SGSH PE=1 SV=1          | SPHM_HUMAN   | 57 kDa  |      | 0.373900966 | 0           | 0       | 2.0863  | 0       | 0       | 0       | 0       |
| 1027 | TRUE | Empty | N-terminal kinase-like protein OS=Homo sapiens GN=SCYL1 PE=1 SV=1              | NTKL_HUMAN   | ?       | TRUE | .373900966  | INF         | 0       | 0       | 0       | 2.57    | 0       | 0       |
| 1028 | TRUE | Empty | Nuclear autoantigenic sperm protein OS=Homo sapiens GN=NASP PE=1 SV=2          | NASP_HUMAN   | ?       |      | 0.658389285 | 0.8         | 13.262  | 14.604  | 10.972  | 18.63   | 3.85    | 10.338  |
| 1029 | TRUE | Empty | Nuclear cap-binding protein subunit 1 OS=Homo sapiens GN=NCBP1 PE=1 SV=1       | NCBP1_HUMAN  | 92 kDa  |      | 0.002480722 | 29.91117438 | 0       | 0       | 0.99746 | 7.22    | 10.166  | 12.217  |
| 1030 | TRUE | Empty | Nuclear factor NF-kappa-B p105 subunit OS=Homo sapiens GN=NFKB1 PE=1 SV=2      | NFKB1_HUMAN  | ?       | TRUE | .884250073  | 1.2         | 0       | 2.0863  | 0.99746 | 3.61    | 0       | 0       |
| 1031 | TRUE | Empty | Nuclear migration protein nudC OS=Homo sapiens GN=NUDC PE=1 SV=1               | NUDC_HUMAN   | 38 kDa  |      | 0.4812811   | 1.6         | 0       | 1.0432  | 4.73    | 4.13    | 2.14    | 2.94    |
| 1032 | TRUE | Empty | Nuclear mitotic apparatus protein 1 OS=Homo sapiens GN=NUMA1 PE=1 SV=2         | NUMA1_HUMAN  | ?       | TRUE | .202792374  | 2.9         | 6.631   | 1.0432  | 2.24    | 18.63   | 6.71    | 5.87    |
| 1033 | TRUE | Empty | Nuclear pore complex protein Nup133 OS=Homo sapiens GN=NUP133 PE=1 SV=2        | NU133_HUMAN  | 129 kDa | TRUE | .003020465  | 5.926453191 | 0       | 0.99746 | 0       | 1.04    | 2.14    | 1.96    |
| 1034 | TRUE | Empty | Nuclear pore complex protein Nup153 OS=Homo sapiens GN=NUP153 PE=1 SV=2        | NU153_HUMAN  | ?       |      | 0.985771666 | 1           | 0       | 1.0432  | 4.73    | 5.65    | 0       | 0.93978 |
| 1035 | TRUE | Empty | Nuclear pore complex protein Nup160 OS=Homo sapiens GN=NUP160 PE=1 SV=3        | NU160_HUMAN  | ?       |      | 0.033085386 | 10.4423235  | 0       | 0.99746 | 0       | 2.57    | 2.14    | 5.87    |
| 1036 | TRUE | Empty | Nuclear pore complex protein Nup205 OS=Homo sapiens GN=NUP205 PE=1 SV=3        | NU205_HUMAN  | 228 kDa |      | 0.12361009  | INF         | 0       | 0       | 0       | 2.57    | 1.43    | 0       |
| 1037 | TRUE | Empty | Nuclear pore complex protein Nup214 OS=Homo sapiens GN=NUP214 PE=1 SV=2        | NU214_HUMAN  | ?       |      | 0.119448566 | INF         | 0       | 0       | 0       | 0       | 3.85    | 2.94    |
| 1038 | TRUE | Empty | Nuclear pore complex protein Nup93 OS=Homo sapiens GN=NUP93 PE=1 SV=2          | NUP93_HUMAN  | ?       |      | 0.082651893 | INF         | 0       | 0       | 0       | 2.57    | 0.84713 | 4.89    |
| 1039 | TRUE | Empty | Nuclear pore glycoprotein p62 OS=Homo sapiens GN=NUP62 PE=1 SV=3               | NUP62_HUMAN  | 53 kDa  |      | 0.976785061 | 1           | 0       | 3.1295  | 0.99746 | 1.04    | 0.84713 | 1.96    |
| 1040 | TRUE | Empty | Nuclear pore membrane glycoprotein 210 OS=Homo sapiens GN=NUP210 PE=1 SV=3     | PO210_HUMAN  | ?       | TRUE | .184606477  | INF         | 0       | 0       | 0       | 0.74522 | 0       | 1.96    |
| 1041 | TRUE | Empty | Nuclear receptor-binding protein OS=Homo sapiens GN=NRBP1 PE=1 SV=1            | NRBP_HUMAN   | 60 kDa  |      | 0.003020465 | 5.926453191 | 0.99746 | 0       | 0       | 1.04    | 2.14    | 1.96    |
| 1042 | TRUE | Empty | Nuclear RNA export factor 1 OS=Homo sapiens GN=NXF1 PE=1 SV=1                  | NXF1_HUMAN   | ?       |      | 0.140218517 | INF         | 0       | 0       | 0       | 0       | 1.43    | 2.94    |
| 1043 | TRUE | Empty | Nuclear transport factor 2 OS=Homo sapiens GN=NUTF2 PE=1 SV=1                  | NTF2_HUMAN   | 14 kDa  |      | 0.920331629 | 0.9         | 0       | 6.259   | 11.969  | 2.09    | 10.166  | 3.91    |
| 1044 | TRUE | Empty | Nuclease-sensitive element-binding protein 1 OS=Homo sapiens GN=YBX1 PE=1 SV=3 | YBOX1_HUMAN  | 36 kDa  | TRUE | .300866003  | 0.7         | 26.524  | 28.166  | 47.878  | 32.79   | 24.567  | 14.097  |
| 1045 | TRUE | Empty | Nucleobindin-1 OS=Homo sapiens GN=NUCB1 PE=1 SV=4                              | NUCB1_HUMAN  | 54 kDa  | TRUE | .172538338  | INF         | 0       | 0       | 0       | 0.74522 | 1.43    | 0       |
| 1046 | TRUE | Empty | Nucleolar and coiled-body phosphoprotein 1 OS=Homo sapiens GN=NOLC1 PE=1 SV=2  | NOLC1_HUMAN  | ?       | TRUE | .387501309  | 0.7         | 13.262  | 10.432  | 4.73    | 6.707   | 10.166  | 1.96    |
| 1047 | TRUE | Empty | Nucleolar GTP-binding protein 1 OS=Homo sapiens GN=GTPBP4 PE=1 SV=3            | NOG1_HUMAN   | ?       | TRUE | .017661144  | 6.775710304 | 0       | 0.99746 | 0       | 1.04    | 3.85    | 1.96    |
| 1048 | TRUE | Empty | Nucleolar protein 11 OS=Homo sapiens GN=NOL11 PE=1 SV=1                        | NOL11_HUMAN  | ?       | TRUE | .094905451  | INF         | 0       | 0       | 0       | 0.74522 | 0.84713 | 2.94    |
| 1049 | TRUE | Empty | Nucleolar protein 16 OS=Homo sapiens GN=NOP16 PE=1 SV=2                        | NOP16_HUMAN  | ?       |      | 0.373900966 | INF         | 0       | 0       | 0       | 0       | 0       | 1.96    |
| 1050 | TRUE | Empty | Nucleolar protein 56 OS=Homo sapiens GN=NOP56 PE=1 SV=4                        | NOP56_HUMAN  | 66 kDa  | TRUE | .145067648  | 4           | 0       | 0       | 0.99746 | 2.57    | 0.84713 | 0.93978 |

|      |      |       |                                                                                    |             |        |      |             |             |         |         |         |        |         |         |
|------|------|-------|------------------------------------------------------------------------------------|-------------|--------|------|-------------|-------------|---------|---------|---------|--------|---------|---------|
| 1051 | TRUE | Empty | Nucleolar protein 58 OS=Homo sapiens GN=NOP58 PE=1 SV=1                            | NOP58_HUMAN | 60 kDa |      | 0.980885008 | 1           | 8.13    | 1.0432  | 3.98    | 6.707  | 5.0828  | 1.96    |
| 1052 | TRUE | Empty | Nucleolar protein 9 OS=Homo sapiens GN=NOP9 PE=1 SV=1                              | NOP9_HUMAN  | ?      | TRUE | .178905938  | 7.8         | 0       | 1.0432  | 0       | 0      | 3.85    | 4.89    |
| 1053 | TRUE | Empty | Nucleolar RNA helicase 2 OS=Homo sapiens GN=DDX21 PE=1 SV=5                        | DDX21_HUMAN | ?      | TRUE | .140218517  | INF         | 0       | 0       | 0       | 0      | 1.43    | 2.94    |
| 1054 | TRUE | Empty | Nucleolar transcription factor 1 OS=Homo sapiens GN=UBTF PE=1 SV=1                 | UBF1_HUMAN  | ?      |      | 0.497773146 | 2.2         | 0       | 1.0432  | 3.98    | 8.74   | 1.43    | 0.93978 |
| 1055 | TRUE | Empty | Nucleolin OS=Homo sapiens GN=NCL PE=1 SV=3                                         | NUCL_HUMAN  | 77 kDa | TRUE | .300530592  | 0.8         | 66.31   | 56.331  | 77.802  | 40.242 | 67.771  | 56.387  |
| 1056 | TRUE | Empty | Nucleolysin TIAR OS=Homo sapiens GN=TIAL1 PE=1 SV=1                                | TIAR_HUMAN  | ?      | TRUE | .348977262  | 0.7         | 4.06    | 3.1295  | 5.47    | 1.04   | 3.85    | 4.89    |
| 1057 | TRUE | Empty | Nucleophosmin OS=Homo sapiens GN=NPM1 PE=1 SV=2                                    | NPM_HUMAN   | ?      | TRUE | .004724601  | 0.292608822 | 64.099  | 90.756  | 81.792  | 28.318 | 29.65   | 11.277  |
| 1058 | TRUE | Empty | Nucleoplasmin-3 OS=Homo sapiens GN=NPM3 PE=1 SV=3                                  | NPM3_HUMAN  | 19 kDa |      | 0.145326302 | 2.3         | 0       | 1.0432  | 1.49    | 1.04   | 2.14    | 2.94    |
| 1059 | TRUE | Empty | Nucleoporin Nup43 OS=Homo sapiens GN=NUP43 PE=1 SV=1                               | NUP43_HUMAN | ?      |      | 0.32064321  | 0.2         | 0       | 3.1295  | 0.99746 | 0      | 0.84713 | 0       |
| 1060 | TRUE | Empty | Nucleoprotein TPR OS=Homo sapiens GN=TPR PE=1 SV=3                                 | TPR_HUMAN   | ?      | TRUE | .503739509  | 0.6         | 0       | 25.036  | 10.972  | 6.707  | 8.13    | 4.89    |
| 1061 | TRUE | Empty | Nucleoside diphosphate kinase A OS=Homo sapiens GN=NME1 PE=1 SV=1                  | NDKA_HUMAN  | ?      | TRUE | .308117282  | 0.8         | 88.413  | 158.56  | 95.756  | 77.503 | 88.102  | 96.798  |
| 1062 | TRUE | Empty | Nucleoside diphosphate kinase B OS=Homo sapiens GN=NME2 PE=1 SV=1                  | NDKB_HUMAN  | ?      | TRUE | .300726417  | 0.7         | 90.623  | 185.68  | 156.6   | 86.445 | 126.22  | 111.83  |
| 1063 | TRUE | Empty | Nucleosome assembly protein 1-like 1 OS=Homo sapiens GN=NAP1L1 PE=1 SV=1           | NP1L1_HUMAN | ?      | TRUE | .461330116  | 0.9         | 13.262  | 14.604  | 22.942  | 15.65  | 14.401  | 13.157  |
| 1064 | TRUE | Empty | Nucleosome assembly protein 1-like 4 OS=Homo sapiens GN=NAP1L4 PE=1 SV=1           | NP1L4_HUMAN | ?      | TRUE | .097169685  | 0.3         | 4.06    | 9.86    | 13.964  | 2.57   | 5.0828  | 0.93978 |
| 1065 | TRUE | Empty | O-acetyl-ADP-ribose deacetylase MACROD1 OS=Homo sapiens GN=MACROD1 PE=1 SV=2       | MACD1_HUMAN | 36 kDa | TRUE | .642647753  | 0.5         | 0       | 2.0863  | 0       | 0      | 0       | 0.93978 |
| 1066 | TRUE | Empty | Obg-like ATPase 1 OS=Homo sapiens GN=OLA1 PE=1 SV=2                                | OLA1_HUMAN  | ?      |      | 0.999376516 | 1           | 15.472  | 16.691  | 28.926  | 13.414 | 27.955  | 19.735  |
| 1067 | TRUE | Empty | OCIA domain-containing protein 1 OS=Homo sapiens GN=OCIA1 PE=1 SV=1                | OCAD1_HUMAN | ?      | TRUE | .024909464  | 5.666602761 | 0       | 1.0432  | 0       | 1.04   | 2.14    | 1.96    |
| 1068 | TRUE | Empty | Omega-amidase NIT2 OS=Homo sapiens GN=NIT2 PE=1 SV=1                               | NIT2_HUMAN  | 31 kDa |      | 0.079448412 | 3           | 0       | 2.0863  | 2.24    | 3.61   | 4.57    | 7.83    |
| 1069 | TRUE | Empty | Opioid growth factor receptor OS=Homo sapiens GN=OGFR PE=1 SV=3                    | OGFR_HUMAN  | ?      | TRUE | 0.01245054  | 4.882180739 | 0       | 0.99746 | 0       | 2.57   | 1.43    | 0.93978 |
| 1070 | TRUE | Empty | Ornithine aminotransferase, mitochondrial OS=Homo sapiens GN=OAT PE=1 SV=1         | OAT_HUMAN   | ?      | TRUE | .003651021  | 8.270005815 | 0       | 0       | 0.99746 | 2.09   | 3.85    | 1.96    |
| 1071 | TRUE | Empty | Osteoclast-stimulating factor 1 OS=Homo sapiens GN=OSTF1 PE=1 SV=2                 | OSTF1_HUMAN | 24 kDa |      | 0.60051185  | 0.7         | 0       | 3.1295  | 6.22    | 2.57   | 2.14    | 1.96    |
| 1072 | TRUE | Empty | OTU domain-containing protein 6B OS=Homo sapiens GN=OTUD6B PE=1 SV=1               | OTU6B_HUMAN | ?      | TRUE | .373900966  | INF         | 0       | 0       | 0       | 1.04   | 0       | 0       |
| 1073 | TRUE | Empty | Oxysterol-binding protein 1 OS=Homo sapiens GN=OSBP PE=1 SV=1                      | OSBP1_HUMAN | 89 kDa | TRUE | .373900966  | INF         | 0       | 0       | 0       | 2.57   | 0       | 0       |
| 1074 | TRUE | Empty | Palladin OS=Homo sapiens GN=PALLD PE=1 SV=3                                        | PALLD_HUMAN | ?      | TRUE | .351961382  | 0.3         | 0       | 2.0863  | 0.99746 | 0      | 0       | 0.93978 |
| 1075 | TRUE | Empty | Parafibromin OS=Homo sapiens GN=CDC73 PE=1 SV=1                                    | CDC73_HUMAN | 61 kDa |      | 0.028213971 | 5.91725984  | 0.99746 | 0       | 0       | 2.57   | 0.84713 | 2.94    |
| 1076 | TRUE | Empty | Paraneoplastic antigen-like protein 6B OS=Homo sapiens GN=PNMA6B PE=3 SV=1         | PNM6B_HUMAN | 44 kDa |      | 0.373900966 | INF         | 0       | 0       | 0       | 0      | 0       | 1.96    |
| 1077 | TRUE | Empty | Paraspeckle component 1 OS=Homo sapiens GN=PSPC1 PE=1 SV=1                         | PSPC1_HUMAN | ?      | TRUE | .640270065  | 0.7         | 0       | 7.22    | 2.24    | 2.57   | 0.84713 | 3.91    |
| 1078 | TRUE | Empty | Parkinson disease 7 domain-containing protein 1 OS=Homo sapiens GN=PDDC1 PE=1 SV=1 | PDDC1_HUMAN | ?      |      | 0.644277704 | 0.7         | 0       | 5.59    | 1.49    | 2.57   | 1.43    | 0.93978 |
| 1079 | TRUE | Empty | Partitioning defective 6 homolog beta OS=Homo sapiens GN=PAR6B PE=1 SV=1           | PAR6B_HUMAN | ?      | TRUE | .940562373  | 1.1         | 0       | 1.0432  | 0.99746 | 2.57   | 0       | 0       |
| 1080 | TRUE | Empty | Partner of Y14 and mago OS=Homo sapiens GN=WIBG PE=1 SV=1                          | WIBG_HUMAN  | ?      |      | 0.588834218 | 0.4         | 0       | 0       | 3.98    | 1.04   | 0       | 0       |
| 1081 | TRUE | Empty | Paxillin OS=Homo sapiens GN=PXN PE=1 SV=3                                          | PAXI_HUMAN  | ?      |      | 0.572783299 | 0.5         | 0       | 2.0863  | 10.972  | 2.57   | 4.57    | 0       |

|      |      |       |                                                                                               |              |         |      |             |             |        |        |         |         |         |         |
|------|------|-------|-----------------------------------------------------------------------------------------------|--------------|---------|------|-------------|-------------|--------|--------|---------|---------|---------|---------|
| 1082 | TRUE | Empty | PCTP-like protein OS=Homo sapiens GN=STARD10 PE=1 SV=2                                        | PCTL_HUMAN   | 33 kDa  | TRUE | .879304869  | 1.1         | 4.06   | 7.22   | 6.22    | 2.57    | 10.166  | 7.83    |
| 1083 | TRUE | Empty | PDZ and LIM domain protein 1 OS=Homo sapiens GN=PDLIM1 PE=1 SV=4                              | PDL11_HUMAN  | 36 kDa  |      | 0.32624249  | 0.4         | 0      | 35.468 | 18.952  | 8.26    | 4.57    | 6.85    |
| 1084 | TRUE | Empty | PDZ and LIM domain protein 5 OS=Homo sapiens GN=PDLIM5 PE=1 SV=5                              | PDLI5_HUMAN  | ?       |      | 0.261032363 | 0.2         | 0      | 11.475 | 4.73    | 0.74522 | 1.43    | 0.93978 |
| 1085 | TRUE | Empty | PDZ and LIM domain protein 7 OS=Homo sapiens GN=PDLIM7 PE=1 SV=1                              | PDLI7_HUMAN  | ?       |      | 0.211887259 | 0.6         | 4.06   | 8.54   | 12.967  | 3.61    | 5.0828  | 5.87    |
| 1086 | TRUE | Empty | PDZ domain-containing protein GIPC1 OS=Homo sapiens GN=GIPC1 PE=1 SV=2                        | GIPC1_HUMAN  | ?       | TRUE | .317180775  | 0.7         | 2.03   | 5.59   | 5.47    | 2.09    | 2.14    | 3.91    |
| 1087 | TRUE | Empty | Peptidyl-prolyl cis-trans isomerase A OS=Homo sapiens GN=PPIA PE=1 SV=2                       | PPIA_HUMAN   | ?       | TRUE | .360411011  | 0.7         | 66.31  | 231.58 | 185.53  | 104.33  | 127.92  | 95.858  |
| 1088 | TRUE | Empty | Peptidyl-prolyl cis-trans isomerase B OS=Homo sapiens GN=PPIB PE=1 SV=2                       | PPIB_HUMAN   | 24 kDa  | TRUE | .202725881  | 1.7         | 17.683 | 14.604 | 3.98    | 13.414  | 22.025  | 27.254  |
| 1089 | TRUE | Empty | Peptidyl-prolyl cis-trans isomerase D OS=Homo sapiens GN=PPID PE=1 SV=3                       | PPID_HUMAN   | 41 kDa  | TRUE | .575026099  | 1.5         | 0      | 2.0863 | 0.99746 | 2.09    | 0.84713 | 0.93978 |
| 1090 | TRUE | Empty | Peptidyl-prolyl cis-trans isomerase F, mitochondrial OS=Homo sapiens GN=PPIF PE=1 SV=1        | PPIF_HUMAN   | ?       | TRUE | .198389237  | 0.1         | 0      | 6.259  | 3.98    | 1.04    | 0       | 0       |
| 1091 | TRUE | Empty | Peptidyl-prolyl cis-trans isomerase FKBP1A OS=Homo sapiens GN=FKBP1A PE=1 SV=2                | FKBP1A_HUMAN | 12 kDa  | TRUE | .213967812  | 0.2         | 0      | 21.907 | 14.962  | 3.61    | 2.14    | 1.96    |
| 1092 | TRUE | Empty | Peptidyl-prolyl cis-trans isomerase FKBP2 OS=Homo sapiens GN=FKBP2 PE=1 SV=2                  | FKBP2_HUMAN  | 16 kDa  |      | 0.635423566 | 0.5         | 0      | 5.59   | 0       | 0.74522 | 1.43    | 0       |
| 1093 | TRUE | Empty | Peptidyl-prolyl cis-trans isomerase FKBP3 OS=Homo sapiens GN=FKBP3 PE=1 SV=1                  | FKBP3_HUMAN  | 25 kDa  |      | 0.496614633 | 0.6         | 4.06   | 8.54   | 23.939  | 8.74    | 7.42    | 7.83    |
| 1094 | TRUE | Empty | Peptidyl-prolyl cis-trans isomerase FKBP4 OS=Homo sapiens GN=FKBP4 PE=1 SV=3                  | FKBP4_HUMAN  | 52 kDa  | TRUE | .309074375  | 1.4         | 19.893 | 19.82  | 13.964  | 16.395  | 33.885  | 22.555  |
| 1095 | TRUE | Empty | Peptidyl-prolyl cis-trans isomerase G OS=Homo sapiens GN=PPIG PE=1 SV=2                       | PPIG_HUMAN   | ?       | TRUE | .699728631  | 1.9         | 0      | 0      | 0.99746 | 0       | 0       | 1.96    |
| 1096 | TRUE | Empty | Peptidyl-prolyl cis-trans isomerase NIMA-interacting 1 OS=Homo sapiens GN=PIN1 PE=1 SV=1      | PIN1_HUMAN   | 18 kDa  |      | 0.230321601 | 0.2         | 0      | 5.59   | 2.24    | 0.74522 | 0       | 0.93978 |
| 1097 | TRUE | Empty | Peptidyl-prolyl cis-trans isomerase NIMA-interacting 4 OS=Homo sapiens GN=PIN4 PE=1 SV=1      | PIN4_HUMAN   | ?       |      | 0.153594946 | 0           | 0      | 2.0863 | 3.98    | 0       | 0       | 0       |
| 1098 | TRUE | Empty | Peptidyl-prolyl cis-trans isomerase-like 1 OS=Homo sapiens GN=PPIL1 PE=1 SV=1                 | PPIL1_HUMAN  | 18 kDa  |      | 0.119086248 | INF         | 0      | 0      | 0       | 2.57    | 0       | 1.96    |
| 1099 | TRUE | Empty | Peptidyl-prolyl cis-trans isomerase-like 3 OS=Homo sapiens GN=PPIL3 PE=1 SV=1                 | PPIL3_HUMAN  | ?       |      | 0.499754298 | 0.2         | 0      | 3.1295 | 0       | 0.74522 | 0       | 0       |
| 1100 | TRUE | Empty | Perilipin-3 OS=Homo sapiens GN=PLIN3 PE=1 SV=3                                                | PLIN3_HUMAN  | ?       | TRUE | .606713185  | 0.7         | 2.03   | 38.597 | 17.954  | 9.78    | 16.096  | 15.037  |
| 1101 | TRUE | Empty | Periplakin OS=Homo sapiens GN=PPL PE=1 SV=4                                                   | PEPL_HUMAN   | 205 kDa | TRUE | 0.70937403  | 0.8         | 4.06   | 19.82  | 14.962  | 5.65    | 15.248  | 12.217  |
| 1102 | TRUE | Empty | Peroxisiredoxin-1 OS=Homo sapiens GN=PRDX1 PE=1 SV=1                                          | PRDX1_HUMAN  | 22 kDa  | TRUE | .022128042  | 0.536773751 | 101.67 | 100.14 | 86.779  | 29.809  | 67.771  | 57.327  |
| 1103 | TRUE | Empty | Peroxisiredoxin-2 OS=Homo sapiens GN=PRDX2 PE=1 SV=5                                          | PRDX2_HUMAN  | ?       | TRUE | .001159416  | 0.506422972 | 50.837 | 50.072 | 54.86   | 21.611  | 26.261  | 31.013  |
| 1104 | TRUE | Empty | Peroxisiredoxin-4 OS=Homo sapiens GN=PRDX4 PE=1 SV=1                                          | PRDX4_HUMAN  | 31 kDa  | TRUE | .043593552  | 2.292194529 | 8.13   | 3.1295 | 3.98    | 9.78    | 11.86   | 15.037  |
| 1105 | TRUE | Empty | Peroxisiredoxin-5, mitochondrial OS=Homo sapiens GN=PRDX5 PE=1 SV=4                           | PRDX5_HUMAN  | ?       |      | 0.395939046 | 0.7         | 8.13   | 45.9   | 38.901  | 19.376  | 22.873  | 18.796  |
| 1106 | TRUE | Empty | Peroxisiredoxin-6 OS=Homo sapiens GN=PRDX6 PE=1 SV=3                                          | PRDX6_HUMAN  | 25 kDa  |      | 0.861128577 | 1           | 26.524 | 38.597 | 36.906  | 31.299  | 38.121  | 30.073  |
| 1107 | TRUE | Empty | Peroxisomal multifunctional enzyme type 2 OS=Homo sapiens GN=HSD17B4 PE=1 SV=3                | DHB4_HUMAN   | ?       | TRUE | .212372811  | 2.3         | 17.683 | 3.1295 | 0.99746 | 23.847  | 15.248  | 11.277  |
| 1108 | TRUE | Empty | PERQ amino acid-rich with GYF domain-containing protein 2 OS=Homo sapiens GN=GIGYF2 PE=1 SV=1 | PERQ2_HUMAN  | ?       | TRUE | .484287573  | 1.7         | 0      | 3.1295 | 0.99746 | 0.74522 | 3.85    | 2.94    |
| 1109 | TRUE | Empty | PEST proteolytic signal-containing nuclear protein OS=Homo sapiens GN=PCNP PE=1 SV=2          | PCNP_HUMAN   | ?       |      | 0.591766252 | 2           | 0      | 0      | 3.98    | 5.17    | 0       | 1.96    |
| 1110 | TRUE | Empty | PHD finger protein 14 OS=Homo sapiens GN=PHF14 PE=1 SV=2                                      | PHF14_HUMAN  | ?       |      | 0.199673922 | 0.2         | 0      | 2.0863 | 1.49    | 0.74522 | 0       | 0       |

|      |      |       |                                                                                                      |             |         |      |             |             |         |         |         |         |         |         |
|------|------|-------|------------------------------------------------------------------------------------------------------|-------------|---------|------|-------------|-------------|---------|---------|---------|---------|---------|---------|
| 1111 | TRUE | Empty | PHD finger-like domain-containing protein 5A OS=Homo sapiens<br>GN=PHF5A PE=1 SV=1                   | PHF5A_HUMAN | 12 kDa  |      | 0.218050734 | 0.2         | 0       | 8.54    | 5.47    | 2.57    | 0.84713 | 0       |
| 1112 | TRUE | Empty | Phenylalanine--tRNA ligase alpha subunit OS=Homo sapiens<br>GN=FARSA PE=1 SV=3                       | SYFA_HUMAN  | ?       | TRUE | .094905451  | INF         | 0       | 0       | 0       | 0.74522 | 0.84713 | 2.94    |
| 1113 | TRUE | Empty | Phenylalanine--tRNA ligase beta subunit OS=Homo sapiens<br>GN=FARSB PE=1 SV=3                        | SYFB_HUMAN  | ?       |      | 0.213714872 | 2.9         | 6.631   | 0       | 0       | 2.09    | 8.13    | 7.83    |
| 1114 | TRUE | Empty | Phosducin-like protein 3 OS=Homo sapiens GN=PDCL3 PE=1 SV=1                                          | PDCL3_HUMAN | 28 kDa  |      | 0.362513878 | 0.4         | 0       | 5.59    | 3.98    | 2.57    | 1.43    | 0       |
| 1115 | TRUE | Empty | Phosphate carrier protein, mitochondrial OS=Homo sapiens<br>GN=SLC25A3 PE=1 SV=2                     | MPCP_HUMAN  | ?       | TRUE | .079724614  | 4.1         | 11.052  | 0       | 0       | 11.178  | 12.707  | 21.615  |
| 1116 | TRUE | Empty | Phosphatidylethanolamine-binding protein 1 OS=Homo sapiens<br>GN=PEBP1 PE=1 SV=3                     | PEBP1_HUMAN | 21 kDa  |      | 0.132389414 | 0.3         | 8.13    | 37.554  | 26.931  | 9.78    | 9.85    | 6.85    |
| 1117 | TRUE | Empty | Phosphatidylinositol 5-phosphate 4-kinase type-2 gamma<br>OS=Homo sapiens GN=PIP4K2C PE=1 SV=3       | PI42C_HUMAN | ?       | TRUE | 0.068535303 | INF         | 0       | 0       | 0       | 0.74522 | 2.14    | 0.93978 |
| 1118 | TRUE | Empty | Phosphatidylinositol-binding clathrin assembly protein OS=Homo<br>sapiens GN=PICALM PE=1 SV=2        | PICAL_HUMAN | ?       | TRUE | .664166928  | 0.7         | 0       | 3.1295  | 6.22    | 1.04    | 5.0828  | 0       |
| 1119 | TRUE | Empty | Phosphoacetylglucosamine mutase OS=Homo sapiens GN=PGM3<br>PE=1 SV=1                                 | AGM1_HUMAN  | ?       |      | 0.152478611 | INF         | 0       | 0       | 0       | 1.04    | 0       | 2.94    |
| 1120 | TRUE | Empty | Phosphoenolpyruvate carboxykinase [GTP], mitochondrial<br>OS=Homo sapiens GN=PCK2 PE=1 SV=3          | PCKGM_HUMAN | ?       | TRUE | .023355892  | 5.071204548 | 0       | 2.0863  | 1.49    | 8.26    | 4.57    | 7.83    |
| 1121 | TRUE | Empty | Phosphoglucomutase-2 OS=Homo sapiens GN=PGM2 PE=1 SV=4                                               | PGM2_HUMAN  | ?       |      | 0.673326908 | 0.7         | 0       | 3.1295  | 5.47    | 4.13    | 1.43    | 0       |
| 1122 | TRUE | Empty | Phosphoglycerate kinase 1 OS=Homo sapiens GN=PGK1 PE=1<br>SV=3                                       | PGK1_HUMAN  | ?       | TRUE | .341500131  | 0.7         | 72.941  | 166.91  | 152.61  | 84.955  | 129.61  | 64.845  |
| 1123 | TRUE | Empty | Phosphoglycerate mutase 1 OS=Homo sapiens GN=PGAM1 PE=1<br>SV=2                                      | PGAM1_HUMAN | 29 kDa  | TRUE | .310998784  | 0.7         | 8.13    | 16.691  | 17.954  | 13.414  | 6.71    | 11.277  |
| 1124 | TRUE | Empty | Phosphoglycolate phosphatase OS=Homo sapiens GN=PGP PE=1<br>SV=1                                     | PGP_HUMAN   | 34 kDa  | TRUE | .765369014  | 1.4         | 0       | 0       | 4.73    | 0.74522 | 4.57    | 1.96    |
| 1125 | TRUE | Empty | Phosphomannomutase 2 OS=Homo sapiens GN=PMM2 PE=1 SV=1                                               | PMM2_HUMAN  | ?       | TRUE | .754117582  | 1.3         | 0       | 1.0432  | 1.49    | 2.57    | 1.43    | 0       |
| 1126 | TRUE | Empty | Phosphoribosyl pyrophosphate synthase-associated protein 1<br>OS=Homo sapiens GN=PRPSA1 PE=1 SV=2    | KPRA_HUMAN  | ?       | TRUE | .110633814  | INF         | 0       | 0       | 0       | 2.57    | 0.84713 | 5.87    |
| 1127 | TRUE | Empty | Phosphoribosyl pyrophosphate synthase-associated protein 2<br>OS=Homo sapiens GN=PRPSA2 PE=1 SV=1    | KPRB_HUMAN  | ?       | TRUE | .047804212  | 16.65670804 | 0       | 0.99746 | 0       | 2.09    | 4.57    | 9.78    |
| 1128 | TRUE | Empty | Phosphoribosylformylglycinamide synthase OS=Homo sapiens<br>GN=PFAS PE=1 SV=4                        | PUR4_HUMAN  | 145 kDa | TRUE | .117667821  | INF         | 0       | 0       | 0       | 0.74522 | 3.85    | 0.93978 |
| 1129 | TRUE | Empty | Pinin OS=Homo sapiens GN=PNN PE=1 SV=4                                                               | PININ_HUMAN | ?       | TRUE | .912639237  | 1.1         | 0       | 6.259   | 8.71    | 4.13    | 2.14    | 9.78    |
| 1130 | TRUE | Empty | Pirin OS=Homo sapiens GN=PIR PE=1 SV=1                                                               | PIR_HUMAN   | 32 kDa  | TRUE | .699728631  | 1.9         | 0       | 0       | 0.99746 | 0       | 0       | 1.96    |
| 1131 | TRUE | Empty | PITH domain-containing protein 1 OS=Homo sapiens GN=PITHD1<br>PE=1 SV=1                              | PITH1_HUMAN | ?       |      | 0.792670078 | 0.8         | 0       | 1.0432  | 2.24    | 1.04    | 0.84713 | 0.93978 |
| 1132 | TRUE | Empty | Plasma membrane calcium-transporting ATPase 1 OS=Homo<br>sapiens GN=ATP2B1 PE=1 SV=3                 | AT2B1_HUMAN | ?       | TRUE | .094905451  | INF         | 0       | 0       | 0       | 0.74522 | 0.84713 | 2.94    |
| 1133 | TRUE | Empty | Plasminogen activator inhibitor 1 RNA-binding protein OS=Homo<br>sapiens GN=SERBP1 PE=1 SV=2         | PAIRB_HUMAN | ?       | TRUE | .822227713  | 0.9         | 0       | 10.432  | 11.969  | 5.65    | 5.99    | 8.81    |
| 1134 | TRUE | Empty | Plastin-1 OS=Homo sapiens GN=PLS1 PE=1 SV=2                                                          | PLS1_HUMAN  | 70 kDa  | TRUE | .014300716  | 7.708680047 | 0.99746 | 0       | 0       | 2.57    | 1.43    | 3.91    |
| 1135 | TRUE | Empty | Platelet-activating factor acetylhydrolase IB subunit alpha<br>OS=Homo sapiens GN=PAFAH1B1 PE=1 SV=2 | LIS1_HUMAN  | ?       |      | 0.445779042 | 0.5         | 0       | 3.1295  | 5.47    | 0.74522 | 0.84713 | 2.94    |
| 1136 | TRUE | Empty | Platelet-activating factor acetylhydrolase IB subunit beta<br>OS=Homo sapiens GN=PAFAH1B2 PE=1 SV=1  | PA1B2_HUMAN | ?       |      | 0.767579459 | 0.8         | 0       | 6.259   | 5.47    | 2.57    | 5.0828  | 2.94    |
| 1137 | TRUE | Empty | Platelet-activating factor acetylhydrolase IB subunit gamma<br>OS=Homo sapiens GN=PAFAH1B3 PE=1 SV=1 | PA1B3_HUMAN | 26 kDa  |      | 0.953673017 | 1           | 0       | 6.259   | 6.22    | 3.61    | 3.85    | 6.85    |
| 1138 | TRUE | Empty | Plectin OS=Homo sapiens GN=PLEC PE=1 SV=3                                                            | PLEC_HUMAN  | ?       | TRUE | .063192899  | 3.1         | 88.413  | 5.59    | 9.46    | 122.22  | 99.962  | 96.798  |

|      |      |       |                                                                                              |             |         |      |             |             |        |         |         |         |         |         |
|------|------|-------|----------------------------------------------------------------------------------------------|-------------|---------|------|-------------|-------------|--------|---------|---------|---------|---------|---------|
| 1139 | TRUE | Empty | Pleiotropic regulator 1 OS=Homo sapiens GN=PLRG1 PE=1 SV=1                                   | PLRG1_HUMAN | ?       |      | 0.657298369 | 0.5         | 0      | 0       | 3.98    | 0       | 0       | 1.96    |
| 1140 | TRUE | Empty | Poly [ADP-ribose] polymerase 1 OS=Homo sapiens GN=PARP1 PE=1 SV=4                            | PARP1_HUMAN | 113 kDa |      | 0.080292299 | 4.1         | 2.03   | 0       | 0.99746 | 2.57    | 4.57    | 6.85    |
| 1141 | TRUE | Empty | Poly(A) polymerase alpha OS=Homo sapiens GN=PAPOLA PE=1 SV=4                                 | PAPOA_HUMAN | ?       | TRUE | .008380466  | 6.019389249 | 0      | 0.99746 | 0       | 1.04    | 1.43    | 2.94    |
| 1142 | TRUE | Empty | Poly(A)-specific ribonuclease PARN OS=Homo sapiens GN=PARN PE=1 SV=1                         | PARN_HUMAN  | ?       |      | 0.817919934 | 1.4         | 0      | 1.0432  | 0       | 1.04    | 0       | 0       |
| 1143 | TRUE | Empty | Poly(rC)-binding protein 1 OS=Homo sapiens GN=PCBP1 PE=1 SV=2                                | PCBP1_HUMAN | 37 kDa  | TRUE | .926750344  | 1           | 15.472 | 40.684  | 51.868  | 32.79   | 45.745  | 32.892  |
| 1144 | TRUE | Empty | Poly(rC)-binding protein 2 OS=Homo sapiens GN=PCBP2 PE=1 SV=1                                | PCBP2_HUMAN | ?       | TRUE | .659157707  | 1.1         | 13.262 | 27.122  | 25.934  | 20.121  | 27.955  | 25.374  |
| 1145 | TRUE | Empty | Poly(U)-binding-splicing factor PUF60 OS=Homo sapiens GN=PUF60 PE=1 SV=1                     | PUF60_HUMAN | ?       |      | 0.757340368 | 0.8         | 8.13   | 2.0863  | 2.24    | 4.13    | 2.14    | 4.89    |
| 1146 | TRUE | Empty | Polyadenylate-binding protein 1 OS=Homo sapiens GN=PABPC1 PE=1 SV=2                          | PABP1_HUMAN | ?       | TRUE | 0.48075554  | 0.8         | 24.314 | 55.288  | 67.827  | 32.79   | 44.898  | 38.531  |
| 1147 | TRUE | Empty | Polyadenylate-binding protein 2 OS=Homo sapiens GN=PABPN1 PE=1 SV=3                          | PABP2_HUMAN | ?       |      | 0.147672906 | INF         | 0      | 0       | 0       | 0       | 1.43    | 0.93978 |
| 1148 | TRUE | Empty | Polyadenylate-binding protein 4 OS=Homo sapiens GN=PABPC4 PE=1 SV=1                          | PABP4_HUMAN | ?       | TRUE | .607004199  | 0.7         | 0      | 21.907  | 26.931  | 12.669  | 14.401  | 7.83    |
| 1149 | TRUE | Empty | Polymerase delta-interacting protein 3 OS=Homo sapiens GN=POLDIP3 PE=1 SV=2                  | PDIP3_HUMAN | ?       |      | 0.373900966 | INF         | 0      | 0       | 0       | 1.04    | 0       | 0       |
| 1150 | TRUE | Empty | Polypeptide N-acetylgalactosaminyltransferase 2 OS=Homo sapiens GN=GALNT2 PE=1 SV=1          | GALT2_HUMAN | ?       | TRUE | .094905451  | INF         | 0      | 0       | 0       | 0.74522 | 0.84713 | 2.94    |
| 1151 | TRUE | Empty | Polypyrimidine tract-binding protein 1 OS=Homo sapiens GN=PTBP1 PE=1 SV=1                    | PTBP1_HUMAN | ?       | TRUE | .633994976  | 0.8         | 15.472 | 39.641  | 60.845  | 36.516  | 28.803  | 30.073  |
| 1152 | TRUE | Empty | Porphobilinogen deaminase OS=Homo sapiens GN=HMBS PE=1 SV=2                                  | HEM3_HUMAN  | ?       |      | 0.817346147 | 1.1         | 2.03   | 6.259   | 7.97    | 4.13    | 6.71    | 6.85    |
| 1153 | TRUE | Empty | Prefoldin subunit 2 OS=Homo sapiens GN=PFDN2 PE=1 SV=1                                       | PFD2_HUMAN  | 17 kDa  | TRUE | .089706545  | 0.4         | 8.13   | 22.95   | 13.964  | 4.13    | 3.85    | 8.81    |
| 1154 | TRUE | Empty | Prefoldin subunit 3 OS=Homo sapiens GN=VBP1 PE=1 SV=3                                        | PFD3_HUMAN  | 23 kDa  | TRUE | .619745948  | 0.7         | 0      | 7.22    | 8.71    | 2.09    | 1.43    | 6.85    |
| 1155 | TRUE | Empty | Prefoldin subunit 4 OS=Homo sapiens GN=PFDN4 PE=1 SV=1                                       | PFD4_HUMAN  | 15 kDa  | TRUE | .364200795  | 0.3         | 0      | 7.22    | 3.98    | 0       | 0       | 3.91    |
| 1156 | TRUE | Empty | Prefoldin subunit 5 OS=Homo sapiens GN=PFDN5 PE=1 SV=2                                       | PFD5_HUMAN  | ?       |      | 0.354643453 | 0.5         | 0      | 11.475  | 9.46    | 2.09    | 3.85    | 3.91    |
| 1157 | TRUE | Empty | Prefoldin subunit 6 OS=Homo sapiens GN=PFDN6 PE=1 SV=1                                       | PFD6_HUMAN  | 15 kDa  |      | 0.216957858 | 0.4         | 2.03   | 8.54    | 2.24    | 1.04    | 1.43    | 1.96    |
| 1158 | TRUE | Empty | Prelamin-A/C OS=Homo sapiens GN=LMNA PE=1 SV=1                                               | LMNA_HUMAN  | ?       | TRUE | .149203928  | 0.6         | 57.468 | 122.05  | 118.7   | 66.324  | 48.287  | 66.725  |
| 1159 | TRUE | Empty | Pre-mRNA 3'-end-processing factor FIP1 OS=Homo sapiens GN=FIP1L1 PE=1 SV=1                   | FIP1_HUMAN  | ?       | TRUE | 0.44053688  | 0.4         | 0      | 10.432  | 3.98    | 2.09    | 2.14    | 0.93978 |
| 1160 | TRUE | Empty | Pre-mRNA-processing factor 19 OS=Homo sapiens GN=PRPF19 PE=1 SV=1                            | PRP19_HUMAN | 55 kDa  |      | 0.529332167 | 1.4         | 0      | 5.59    | 7.97    | 8.26    | 4.57    | 5.87    |
| 1161 | TRUE | Empty | Pre-mRNA-processing factor 40 homolog A OS=Homo sapiens GN=PRPF40A PE=1 SV=2                 | PR40A_HUMAN | ?       | TRUE | .081452559  | 2.3         | 0      | 2.0863  | 2.24    | 3.61    | 3.85    | 4.89    |
| 1162 | TRUE | Empty | Pre-mRNA-processing factor 6 OS=Homo sapiens GN=PRPF6 PE=1 SV=1                              | PRP6_HUMAN  | ?       | TRUE | .189953018  | INF         | 0      | 0       | 0       | 2.57    | 0.84713 | 0       |
| 1163 | TRUE | Empty | Pre-mRNA-processing-splicing factor 8 OS=Homo sapiens GN=PRPF8 PE=1 SV=2                     | PRP8_HUMAN  | 274 kDa |      | 0.006005601 | 5.259592846 | 8.13   | 0       | 1.49    | 19.376  | 16.943  | 20.675  |
| 1164 | TRUE | Empty | Pre-mRNA-splicing factor ATP-dependent RNA helicase DHX15 OS=Homo sapiens GN=DHX15 PE=1 SV=2 | DHX15_HUMAN | 91 kDa  | TRUE | .143342374  | 2.5         | 8.13   | 2.0863  | 1.49    | 5.17    | 11.013  | 15.976  |
| 1165 | TRUE | Empty | Pre-mRNA-splicing factor ISY1 homolog OS=Homo sapiens GN=ISY1 PE=1 SV=3                      | ISY1_HUMAN  | ?       | TRUE | .589707208  | 0.6         | 0      | 3.1295  | 0.99746 | 1.04    | 0.84713 | 0       |

|      |      |       |                                                                                                                 |             |         |      |             |             |         |        |         |         |         |         |
|------|------|-------|-----------------------------------------------------------------------------------------------------------------|-------------|---------|------|-------------|-------------|---------|--------|---------|---------|---------|---------|
| 1166 | TRUE | Empty | Pre-mRNA-splicing factor SPF27 OS=Homo sapiens GN=BCAS2<br>PE=1 SV=1                                            | SPF27_HUMAN | 26 kDa  |      | 0.057553063 | 3.2         | 0       | 2.0863 | 0.99746 | 4.13    | 2.14    | 2.94    |
| 1167 | TRUE | Empty | Pre-mRNA-splicing regulator WTAP OS=Homo sapiens GN=WTAP<br>PE=1 SV=2                                           | FL2D_HUMAN  | ?       |      | 0.351961382 | 0.3         | 0       | 2.0863 | 0.99746 | 0       | 0       | 0.93978 |
| 1168 | TRUE | Empty | Prenylcysteine oxidase 1 OS=Homo sapiens GN=PCYOX1 PE=1<br>SV=3                                                 | PCYOX_HUMAN | ?       |      | 0.19309281  | 3           | 4.06    | 0      | 0       | 3.61    | 6.71    | 2.94    |
| 1169 | TRUE | Empty | Presequence protease, mitochondrial OS=Homo sapiens<br>GN=PITRM1 PE=1 SV=3                                      | PREP_HUMAN  | ?       | TRUE | .002281953  | 6.766587131 | 0       | 0      | 0.99746 | 2.57    | 1.43    | 2.94    |
| 1170 | TRUE | Empty | PRKC apoptosis WT1 regulator protein OS=Homo sapiens<br>GN=PAWR PE=1 SV=1                                       | PAWR_HUMAN  | 37 kDa  |      | 0.232907743 | 0           | 0       | 1.0432 | 3.98    | 0       | 0       | 0       |
| 1171 | TRUE | Empty | Probable 2-oxoglutarate dehydrogenase E1 component DHKTD1,<br>mitochondrial OS=Homo sapiens GN=DHTKD1 PE=1 SV=2 | DHTK1_HUMAN | 103 kDa | TRUE | .084566581  | INF         | 0       | 0      | 0       | 2.09    | 0.84713 | 0.93978 |
| 1172 | TRUE | Empty | Probable aminopeptidase NPEPL1 OS=Homo sapiens GN=NPEPL1<br>PE=1 SV=3                                           | PEPL1_HUMAN | ?       |      | 0.600113173 | 0.7         | 0       | 13.561 | 16.957  | 2.57    | 5.99    | 12.217  |
| 1173 | TRUE | Empty | Probable ATP-dependent RNA helicase DDX17 OS=Homo sapiens<br>GN=DDX17 PE=1 SV=2                                 | DDX17_HUMAN | ?       | TRUE | .345327057  | 0.7         | 26.524  | 61.547 | 64.835  | 45.458  | 33.038  | 32.892  |
| 1174 | TRUE | Empty | Probable ATP-dependent RNA helicase DDX23 OS=Homo sapiens<br>GN=DDX23 PE=1 SV=3                                 | DDX23_HUMAN | ?       | TRUE | .417424624  | 1.7         | 2.03    | 0      | 2.24    | 1.04    | 2.14    | 4.89    |
| 1175 | TRUE | Empty | Probable ATP-dependent RNA helicase DDX46 OS=Homo sapiens<br>GN=DDX46 PE=1 SV=2                                 | DDX46_HUMAN | 117 kDa | TRUE | .351986425  | 1.9         | 11.052  | 0      | 3.98    | 5.65    | 8.13    | 15.037  |
| 1176 | TRUE | Empty | Probable ATP-dependent RNA helicase DDX5 OS=Homo sapiens<br>GN=DDX5 PE=1 SV=1                                   | DDX5_HUMAN  | ?       | TRUE | .097451013  | 0.7         | 41.996  | 56.331 | 54.86   | 25.337  | 45.745  | 33.832  |
| 1177 | TRUE | Empty | Probable ATP-dependent RNA helicase DDX6 OS=Homo sapiens<br>GN=DDX6 PE=1 SV=2                                   | DDX6_HUMAN  | 54 kDa  |      | 0.032878705 | 1.802925646 | 4.06    | 3.1295 | 4.73    | 6.707   | 9.85    | 6.85    |
| 1178 | TRUE | Empty | Probable cytosolic iron-sulfur protein assembly protein CIAO1<br>OS=Homo sapiens GN=CIAO1 PE=1 SV=1             | CIAO1_HUMAN | 38 kDa  |      | 0.693507807 | 1.6         | 0       | 0      | 1.49    | 2.57    | 0       | 0.93978 |
| 1179 | TRUE | Empty | Probable global transcription activator SNF2L2 OS=Homo sapiens<br>GN=SMARCA2 PE=1 SV=2                          | SMCA2_HUMAN | ?       | TRUE | .043064785  | 5.272311672 | 0       | 0      | 0.99746 | 0.74522 | 1.43    | 2.94    |
| 1180 | TRUE | Empty | Probable rRNA-processing protein EBP2 OS=Homo sapiens<br>GN=EBNA1BP2 PE=1 SV=2                                  | EBP2_HUMAN  | 35 kDa  | TRUE | .957772143  | 1           | 0       | 1.0432 | 3.98    | 0.74522 | 1.43    | 2.94    |
| 1181 | TRUE | Empty | Probable tRNA N6-adenosine threonylcarbamoyltransferase<br>OS=Homo sapiens GN=OSGEP PE=1 SV=1                   | OSGEP_HUMAN | 36 kDa  |      | 0.043064785 | 5.272311672 | 0.99746 | 0      | 0       | 0.74522 | 1.43    | 2.94    |
| 1182 | TRUE | Empty | Probable ubiquitin carboxyl-terminal hydrolase FAF-X OS=Homo<br>sapiens GN=USP9X PE=1 SV=3                      | USP9X_HUMAN | ?       | TRUE | .282095346  | 3.4         | 4.06    | 0      | 0       | 0.74522 | 5.0828  | 9.78    |
| 1183 | TRUE | Empty | Pro-cathepsin H OS=Homo sapiens GN=CTSH PE=1 SV=4                                                               | CATH_HUMAN  | 37 kDa  |      | 0.351961382 | 0.3         | 0       | 2.0863 | 0.99746 | 0       | 0       | 0.93978 |
| 1184 | TRUE | Empty | Procollagen-lysine,2-oxoglutarate 5-dioxygenase 2 OS=Homo<br>sapiens GN=PLOD2 PE=1 SV=2                         | PLOD2_HUMAN | ?       |      | 0.130757249 | INF         | 0       | 0      | 0       | 0       | 2.14    | 3.91    |
| 1185 | TRUE | Empty | Profilin-1 OS=Homo sapiens GN=PFN1 PE=1 SV=2                                                                    | PROF1_HUMAN | 15 kDa  |      | 0.370335681 | 0.6         | 53.048  | 285.83 | 215.45  | 84.955  | 140.62  | 114.65  |
| 1186 | TRUE | Empty | Profilin-2 OS=Homo sapiens GN=PFN2 PE=1 SV=3                                                                    | PROF2_HUMAN | ?       |      | 0.662805573 | 0.8         | 2.03    | 5.59   | 10.972  | 2.09    | 6.71    | 4.89    |
| 1187 | TRUE | Empty | Programmed cell death 6-interacting protein OS=Homo sapiens<br>GN=PDCD6IP PE=1 SV=1                             | PDC6I_HUMAN | ?       |      | 0.007705435 | 5.047353903 | 6.631   | 2.0863 | 2.24    | 25.337  | 17.79   | 15.976  |
| 1188 | TRUE | Empty | Programmed cell death protein 10 OS=Homo sapiens GN=PDCD10<br>PE=1 SV=1                                         | PDC10_HUMAN | 25 kDa  | TRUE | .674725081  | 0.5         | 0       | 0      | 2.24    | 0.74522 | 0.84713 | 0       |
| 1189 | TRUE | Empty | Programmed cell death protein 5 OS=Homo sapiens GN=PDCD5<br>PE=1 SV=3                                           | PDCD5_HUMAN | ?       | TRUE | 0.24624684  | 0.3         | 2.03    | 18.777 | 8.71    | 2.57    | 4.57    | 3.91    |
| 1190 | TRUE | Empty | Programmed cell death protein 6 OS=Homo sapiens GN=PDCD6<br>PE=1 SV=1                                           | PDCD6_HUMAN | ?       |      | 0.148471018 | 3.3         | 4.06    | 1.0432 | 5.47    | 3.61    | 14.401  | 19.735  |
| 1191 | TRUE | Empty | Prohibitin OS=Homo sapiens GN=PHB PE=1 SV=1                                                                     | PHB_HUMAN   | ?       | TRUE | .383003249  | 1.5         | 8.13    | 13.561 | 16.957  | 32.79   | 12.707  | 14.097  |
| 1192 | TRUE | Empty | Prohibitin-2 OS=Homo sapiens GN=PHB2 PE=1 SV=2                                                                  | PHB2_HUMAN  | ?       |      | 0.321284871 | 2.2         | 19.893  | 0      | 0.99746 | 17.14   | 20.331  | 8.81    |
| 1193 | TRUE | Empty | Proliferating cell nuclear antigen OS=Homo sapiens GN=PCNA<br>PE=1 SV=1                                         | PCNA_HUMAN  | 29 kDa  |      | 0.163965276 | 2           | 0       | 10.432 | 8.71    | 11.923  | 10.166  | 16.916  |

|      |      |       |                                                                                                 |             |         |      |             |             |        |        |        |         |         |        |
|------|------|-------|-------------------------------------------------------------------------------------------------|-------------|---------|------|-------------|-------------|--------|--------|--------|---------|---------|--------|
| 1194 | TRUE | Empty | Proliferation-associated protein 2G4 OS=Homo sapiens<br>GN=PA2G4 PE=1 SV=3                      | PA2G4_HUMAN | ?       | TRUE | .824188082  | 0.9         | 19.893 | 47.986 | 34.911 | 46.949  | 29.65   | 17.856 |
| 1195 | TRUE | Empty | Proline synthase co-transcribed bacterial homolog protein<br>OS=Homo sapiens GN=PROSC PE=1 SV=1 | PROSC_HUMAN | 30 kDa  |      | 0.702826551 | 0.7         | 0      | 2.0863 | 4.73   | 1.04    | 0.84713 | 2.94   |
| 1196 | TRUE | Empty | Proline-, glutamic acid- and leucine-rich protein 1 OS=Homo<br>sapiens GN=PELP1 PE=1 SV=2       | PELP1_HUMAN | 120 kDa |      | 0.107896076 | 12          | 0      | 1.0432 | 0      | 2.09    | 1.43    | 7.83   |
| 1197 | TRUE | Empty | Proline-rich protein PRCC OS=Homo sapiens GN=PRCC PE=1 SV=1                                     | PRCC_HUMAN  | 52 kDa  |      | 0.373900966 | 0           | 0      | 0      | 1.49   | 0       | 0       | 0      |
| 1198 | TRUE | Empty | Prolyl endopeptidase OS=Homo sapiens GN=PREP PE=1 SV=2                                          | PPCE_HUMAN  | 81 kDa  |      | 0.172534037 | INF         | 0      | 0      | 0      | 2.57    | 5.0828  | 0      |
| 1199 | TRUE | Empty | Prosaposin OS=Homo sapiens GN=PSAP PE=1 SV=2                                                    | SAP_HUMAN   | ?       |      | 0.10411851  | 1.5         | 8.13   | 4.1727 | 4.73   | 8.74    | 9.85    | 10.338 |
| 1200 | TRUE | Empty | Prostaglandin E synthase 2 OS=Homo sapiens GN=PTGES2 PE=1<br>SV=1                               | PGES2_HUMAN | 42 kDa  |      | 0.12361009  | INF         | 0      | 0      | 0      | 2.57    | 1.43    | 0      |
| 1201 | TRUE | Empty | Prostaglandin E synthase 3 OS=Homo sapiens GN=PTGES3 PE=1<br>SV=1                               | TEBP_HUMAN  | ?       |      | 0.751920473 | 0.8         | 0      | 18.777 | 23.939 | 5.65    | 14.401  | 15.037 |
| 1202 | TRUE | Empty | Prostaglandin reductase 1 OS=Homo sapiens GN=PTGR1 PE=1<br>SV=2                                 | PTGR1_HUMAN | ?       | TRUE | .306886912  | 2.8         | 0      | 2.0863 | 2.24   | 5.17    | 0       | 8.81   |
| 1203 | TRUE | Empty | Prostaglandin reductase 2 OS=Homo sapiens GN=PTGR2 PE=1<br>SV=1                                 | PTGR2_HUMAN | ?       |      | 0.232907743 | 0           | 0      | 1.0432 | 3.98   | 0       | 0       | 0      |
| 1204 | TRUE | Empty | Proteasomal ATPase-associated factor 1 OS=Homo sapiens<br>GN=PAAF1 PE=1 SV=2                    | PAAF1_HUMAN | ?       | TRUE | .319930661  | 0.4         | 0      | 2.0863 | 1.49   | 0.74522 | 0.84713 | 0      |
| 1205 | TRUE | Empty | Proteasome activator complex subunit 1 OS=Homo sapiens<br>GN=PSME1 PE=1 SV=1                    | PSME1_HUMAN | ?       |      | 0.002120875 | 2.178926293 | 11.052 | 9.86   | 8.71   | 23.847  | 18.637  | 21.615 |
| 1206 | TRUE | Empty | Proteasome activator complex subunit 2 OS=Homo sapiens<br>GN=PSME2 PE=1 SV=4                    | PSME2_HUMAN | 27 kDa  | TRUE | 0.7966199   | 1.2         | 11.052 | 1.0432 | 3.98   | 5.65    | 6.71    | 6.85   |
| 1207 | TRUE | Empty | Proteasome activator complex subunit 3 OS=Homo sapiens<br>GN=PSME3 PE=1 SV=1                    | PSME3_HUMAN | ?       | TRUE | .184637389  | 2           | 0      | 2.0863 | 4.73   | 5.65    | 4.57    | 4.89   |
| 1208 | TRUE | Empty | Proteasome subunit alpha type-1 OS=Homo sapiens GN=PSMA1<br>PE=1 SV=1                           | PSA1_HUMAN  | ?       |      | 0.198971499 | 0.5         | 4.06   | 15.648 | 12.967 | 7.22    | 5.99    | 2.94   |
| 1209 | TRUE | Empty | Proteasome subunit alpha type-2 OS=Homo sapiens GN=PSMA2<br>PE=1 SV=2                           | PSA2_HUMAN  | 26 kDa  |      | 0.580429758 | 0.7         | 0      | 47.986 | 40.896 | 17.14   | 27.955  | 15.976 |
| 1210 | TRUE | Empty | Proteasome subunit alpha type-3 OS=Homo sapiens GN=PSMA3<br>PE=1 SV=2                           | PSA3_HUMAN  | ?       |      | 0.428553478 | 0.8         | 17.683 | 9.86   | 18.952 | 10.433  | 11.86   | 15.037 |
| 1211 | TRUE | Empty | Proteasome subunit alpha type-4 OS=Homo sapiens GN=PSMA4<br>PE=1 SV=1                           | PSA4_HUMAN  | ?       | TRUE | 0.183114    | 0.3         | 2.03   | 22.95  | 24.936 | 5.65    | 5.99    | 3.91   |
| 1212 | TRUE | Empty | Proteasome subunit alpha type-5 OS=Homo sapiens GN=PSMA5<br>PE=1 SV=3                           | PSA5_HUMAN  | ?       |      | 0.480403508 | 0.7         | 22.103 | 58.418 | 26.931 | 22.357  | 33.038  | 24.434 |
| 1213 | TRUE | Empty | Proteasome subunit alpha type-6 OS=Homo sapiens GN=PSMA6<br>PE=1 SV=1                           | PSA6_HUMAN  | ?       |      | 0.150508864 | 0.4         | 13.262 | 53.202 | 34.911 | 15.65   | 9.85    | 14.097 |
| 1214 | TRUE | Empty | Proteasome subunit alpha type-7 OS=Homo sapiens GN=PSMA7<br>PE=1 SV=1                           | PSA7_HUMAN  | ?       | TRUE | .051893585  | 0.3         | 13.262 | 22.95  | 33.914 | 7.22    | 5.99    | 7.83   |
| 1215 | TRUE | Empty | Proteasome subunit beta type-1 OS=Homo sapiens GN=PSMB1<br>PE=1 SV=2                            | PSB1_HUMAN  | 26 kDa  |      | 0.311300197 | 0.6         | 8.13   | 40.684 | 41.893 | 8.26    | 25.414  | 15.976 |
| 1216 | TRUE | Empty | Proteasome subunit beta type-2 OS=Homo sapiens GN=PSMB2<br>PE=1 SV=1                            | PSB2_HUMAN  | 23 kDa  |      | 0.062919861 | 0.5         | 13.262 | 27.122 | 25.934 | 11.923  | 11.013  | 8.81   |
| 1217 | TRUE | Empty | Proteasome subunit beta type-3 OS=Homo sapiens GN=PSMB3<br>PE=1 SV=2                            | PSB3_HUMAN  | 23 kDa  |      | 0.008184827 | 0.494381006 | 17.683 | 22.95  | 17.954 | 10.433  | 11.013  | 7.83   |
| 1218 | TRUE | Empty | Proteasome subunit beta type-4 OS=Homo sapiens GN=PSMB4<br>PE=1 SV=4                            | PSB4_HUMAN  | 29 kDa  |      | 0.316093054 | 0.6         | 4.06   | 19.82  | 13.964 | 5.65    | 7.42    | 9.78   |
| 1219 | TRUE | Empty | Proteasome subunit beta type-5 OS=Homo sapiens GN=PSMB5<br>PE=1 SV=3                            | PSB5_HUMAN  | ?       |      | 0.433877791 | 0.6         | 8.13   | 30.252 | 14.962 | 3.61    | 8.13    | 20.675 |
| 1220 | TRUE | Empty | Proteasome subunit beta type-6 OS=Homo sapiens GN=PSMB6<br>PE=1 SV=4                            | PSB6_HUMAN  | 25 kDa  |      | 0.474864947 | 0.9         | 6.631  | 5.59   | 6.22   | 5.17    | 5.99    | 5.87   |

|      |      |       |                                                                                                       |             |         |      |             |             |         |         |         |         |         |         |
|------|------|-------|-------------------------------------------------------------------------------------------------------|-------------|---------|------|-------------|-------------|---------|---------|---------|---------|---------|---------|
| 1221 | TRUE | Empty | Proteasome subunit beta type-7 OS=Homo sapiens GN=PSMB7 PE=1 SV=1                                     | PSB7_HUMAN  | ?       |      | 0.368127352 | 0.3         | 0       | 10.432  | 2.24    | 0       | 3.85    | 0       |
| 1222 | TRUE | Empty | Proteasome-associated protein ECM29 homolog OS=Homo sapiens GN=ECM29 PE=1 SV=2                        | ECM29_HUMAN | 204 kDa |      | 0.071487659 | 3.7         | 6.631   | 0       | 0       | 10.433  | 6.71    | 7.83    |
| 1223 | TRUE | Empty | Protein arginine N-methyltransferase 1 OS=Homo sapiens GN=PRMT1 PE=1 SV=2                             | ANM1_HUMAN  | ?       | TRUE | .061023822  | 4.2         | 4.06    | 2.0863  | 0.99746 | 11.178  | 5.0828  | 15.037  |
| 1224 | TRUE | Empty | Protein arginine N-methyltransferase 5 OS=Homo sapiens GN=PRMT5 PE=1 SV=4                             | ANM5_HUMAN  | ?       |      | 0.003318656 | 7.53164807  | 0       | 1.0432  | 1.49    | 6.707   | 6.71    | 9.78    |
| 1225 | TRUE | Empty | Protein argonaute-2 OS=Homo sapiens GN=AGO2 PE=1 SV=3                                                 | AGO2_HUMAN  | ?       | TRUE | .472817258  | 0.5         | 0       | 2.0863  | 6.22    | 1.04    | 1.43    | 0.93978 |
| 1226 | TRUE | Empty | Protein BRICK1 OS=Homo sapiens GN=BRK1 PE=1 SV=1                                                      | BRK1_HUMAN  | ?       |      | 0.245979005 | 0.3         | 0       | 3.1295  | 2.24    | 0       | 0.84713 | 0.93978 |
| 1227 | TRUE | Empty | Protein BUD31 homolog OS=Homo sapiens GN=BUD31 PE=1 SV=2                                              | BUD31_HUMAN | ?       | TRUE | .424502508  | 0.4         | 0       | 1.0432  | 2.24    | 0.74522 | 0.84713 | 0       |
| 1228 | TRUE | Empty | Protein C10 OS=Homo sapiens GN=C12orf57 PE=1 SV=1                                                     | C10_HUMAN   | 13 kDa  |      | 0.312325166 | 0.4         | 0       | 7.22    | 9.46    | 1.04    | 2.14    | 2.94    |
| 1229 | TRUE | Empty | Protein canopy homolog 2 OS=Homo sapiens GN=CNPY2 PE=1 SV=1                                           | CNPY2_HUMAN | ?       |      | 0.279251548 | 4           | 0       | 0       | 0.99746 | 1.04    | 2.14    | 0       |
| 1230 | TRUE | Empty | Protein CDV3 homolog OS=Homo sapiens GN=CDV3 PE=1 SV=1                                                | CDV3_HUMAN  | ?       | TRUE | .154337022  | 0.1         | 0       | 4.1727  | 3.98    | 0       | 0.84713 | 0       |
| 1231 | TRUE | Empty | Protein CutA OS=Homo sapiens GN=CUTA PE=1 SV=2                                                        | CUTA_HUMAN  | ?       |      | 0.38199956  | 0.4         | 0       | 29.209  | 14.962  | 5.17    | 8.13    | 4.89    |
| 1232 | TRUE | Empty | Protein deglycase DJ-1 OS=Homo sapiens GN=PARK7 PE=1 SV=2                                             | PARK7_HUMAN | 20 kDa  | TRUE | .676168381  | 0.7         | 2.03    | 111.62  | 44.886  | 56.637  | 26.261  | 31.013  |
| 1233 | TRUE | Empty | Protein DEK OS=Homo sapiens GN=DEK PE=1 SV=1                                                          | DEK_HUMAN   | ?       |      | 0.123705651 | 0.6         | 4.06    | 6.259   | 4.73    | 3.61    | 4.57    | 0.93978 |
| 1234 | TRUE | Empty | Protein diaphanous homolog 1 OS=Homo sapiens GN=DIAPH1 PE=1 SV=2                                      | DIAP1_HUMAN | ?       | TRUE | .028810692  | 15.72383855 | 0.99746 | 0       | 0       | 2.57    | 5.99    | 7.83    |
| 1235 | TRUE | Empty | Protein disulfide-isomerase A3 OS=Homo sapiens GN=PDIA3 PE=1 SV=4                                     | PDIA3_HUMAN | 57 kDa  | TRUE | 0.05178919  | 3.1         | 15.472  | 3.1295  | 2.24    | 29.809  | 18.637  | 18.796  |
| 1236 | TRUE | Empty | Protein disulfide-isomerase A4 OS=Homo sapiens GN=PDIA4 PE=1 SV=2                                     | PDIA4_HUMAN | 73 kDa  | TRUE | .113987506  | 3.7         | 13.262  | 0       | 0       | 9.78    | 16.096  | 23.495  |
| 1237 | TRUE | Empty | Protein disulfide-isomerase A6 OS=Homo sapiens GN=PDIA6 PE=1 SV=1                                     | PDIA6_HUMAN | ?       |      | 0.551065016 | 1.5         | 37.575  | 4.1727  | 1.49    | 15.65   | 27.108  | 24.434  |
| 1238 | TRUE | Empty | Protein disulfide-isomerase OS=Homo sapiens GN=P4HB PE=1 SV=3                                         | PDIA1_HUMAN | 57 kDa  |      | 0.158188948 | 2.1         | 39.786  | 6.259   | 7.97    | 43.223  | 30.497  | 40.411  |
| 1239 | TRUE | Empty | Protein dopey-2 OS=Homo sapiens GN=DOPEY2 PE=1 SV=5                                                   | DOP2_HUMAN  | ?       | TRUE | .009521936  | 4.227868787 | 0.99746 | 0       | 0       | 1.04    | 0.84713 | 1.96    |
| 1240 | TRUE | Empty | Protein dpy-30 homolog OS=Homo sapiens GN=DPY30 PE=1 SV=1                                             | DPY30_HUMAN | 11 kDa  |      | 0.051417907 | 0.4         | 19.893  | 39.641  | 26.931  | 11.923  | 13.554  | 13.157  |
| 1241 | TRUE | Empty | Protein FAM49B OS=Homo sapiens GN=FAM49B PE=1 SV=1                                                    | FA49B_HUMAN | ?       | TRUE | .005165388  | 8.735511017 | 2.03    | 0       | 0       | 6.707   | 5.0828  | 7.83    |
| 1242 | TRUE | Empty | Protein FAM83H OS=Homo sapiens GN=FAM83H PE=1 SV=3                                                    | FA83H_HUMAN | 127 kDa | TRUE | .040067787  | 18.10849558 | 0       | 0       | 0.99746 | 8.26    | 2.14    | 6.85    |
| 1243 | TRUE | Empty | Protein FAM91A1 OS=Homo sapiens GN=FAM91A1 PE=1 SV=3                                                  | F91A1_HUMAN | 94 kDa  | TRUE | .172538338  | INF         | 0       | 0       | 0       | 0.74522 | 1.43    | 0       |
| 1244 | TRUE | Empty | Protein FAM98A OS=Homo sapiens GN=FAM98A PE=1 SV=1                                                    | FA98A_HUMAN | ?       | TRUE | .373900966  | 0           | 0       | 0       | 1.49    | 0       | 0       | 0       |
| 1245 | TRUE | Empty | Protein FAM98B OS=Homo sapiens GN=FAM98B PE=1 SV=1                                                    | FA98B_HUMAN | ?       | TRUE | .207751452  | 2.9         | 0       | 0       | 1.49    | 2.57    | 2.14    | 0.93978 |
| 1246 | TRUE | Empty | Protein flightless-1 homolog OS=Homo sapiens GN=FLII PE=1 SV=2                                        | FLII_HUMAN  | ?       |      | 0.007619046 | 10.91081347 | 0       | 0.99746 | 0       | 2.09    | 5.0828  | 2.94    |
| 1247 | TRUE | Empty | Protein HID1 OS=Homo sapiens GN=HID1 PE=1 SV=1                                                        | HID1_HUMAN  | ?       |      | 0.152633534 | INF         | 0       | 0       | 0       | 2.57    | 4.57    | 0       |
| 1248 | TRUE | Empty | Protein Hikeshi OS=Homo sapiens GN=C11orf73 PE=1 SV=2                                                 | HIKES_HUMAN | 22 kDa  |      | 0.010315957 | 7.717903475 | 0       | 0.99746 | 0       | 1.04    | 3.85    | 2.94    |
| 1249 | TRUE | Empty | Protein kinase C and casein kinase substrate in neurons protein 2 OS=Homo sapiens GN=PACIN2 PE=1 SV=2 | PACN2_HUMAN | ?       | TRUE | .387537566  | 3           | 0       | 1.0432  | 0.99746 | 1.04    | 0       | 4.89    |

|      |      |       |                                                                                      |             |        |      |             |             |         |         |         |         |         |         |
|------|------|-------|--------------------------------------------------------------------------------------|-------------|--------|------|-------------|-------------|---------|---------|---------|---------|---------|---------|
| 1250 | TRUE | Empty | Protein kinase C delta type OS=Homo sapiens GN=PRKCD PE=1 SV=2                       | KPCD_HUMAN  | ?      | TRUE | .063437116  | INF         | 0       | 0       | 0       | 3.61    | 1.43    | 0.93978 |
| 1251 | TRUE | Empty | Protein kinase C-binding protein 1 OS=Homo sapiens GN=ZMYND8 PE=1 SV=2               | PKCB1_HUMAN | ?      | TRUE | .003020465  | 5.926453191 | 0       | 0.99746 | 0       | 1.04    | 2.14    | 1.96    |
| 1252 | TRUE | Empty | Protein lin-7 homolog C OS=Homo sapiens GN=LIN7C PE=1 SV=1                           | LIN7C_HUMAN | 22 kDa | TRUE | .914036816  | 1.1         | 0       | 2.0863  | 1.49    | 0.74522 | 0.84713 | 2.94    |
| 1253 | TRUE | Empty | Protein LYRIC OS=Homo sapiens GN=MTDH PE=1 SV=2                                      | LYRIC_HUMAN | 64 kDa |      | 0.231711402 | INF         | 0       | 0       | 0       | 0.74522 | 0       | 2.94    |
| 1254 | TRUE | Empty | Protein MAK16 homolog OS=Homo sapiens GN=MAK16 PE=1 SV=2                             | MAK16_HUMAN | 35 kDa |      | 0.657291243 | 0.5         | 0       | 0       | 1.49    | 0       | 0       | 0.93978 |
| 1255 | TRUE | Empty | Protein MEMO1 OS=Homo sapiens GN=MEMO1 PE=1 SV=1                                     | MEMO1_HUMAN | ?      |      | 0.001524133 | 7.420748702 | 0       | 0.99746 | 0       | 2.09    | 2.14    | 1.96    |
| 1256 | TRUE | Empty | Protein MON2 homolog OS=Homo sapiens GN=MON2 PE=1 SV=3                               | MON2_HUMAN  | ?      | TRUE | .009521936  | 4.227868787 | 0.99746 | 0       | 0       | 1.04    | 0.84713 | 1.96    |
| 1257 | TRUE | Empty | Protein NDRG1 OS=Homo sapiens GN=NDRG1 PE=1 SV=1                                     | NDRG1_HUMAN | ?      |      | 0.741876826 | 1.3         | 0       | 7.22    | 1.49    | 8.74    | 3.85    | 0.93978 |
| 1258 | TRUE | Empty | Protein NOXP20 OS=Homo sapiens GN=FAM114A1 PE=1 SV=2                                 | NXP20_HUMAN | ?      | TRUE | .388505473  | 3.5         | 0       | 1.0432  | 0       | 0       | 0.84713 | 2.94    |
| 1259 | TRUE | Empty | Protein O-GlcNAcase OS=Homo sapiens GN=MGEA5 PE=1 SV=2                               | OGA_HUMAN   | ?      |      | 0.03308882  | 3.48079121  | 0       | 0.99746 | 0       | 0.74522 | 0.84713 | 1.96    |
| 1260 | TRUE | Empty | Protein PAXX OS=Homo sapiens GN=C9orf142 PE=1 SV=2                                   | PAXX_HUMAN  | ?      |      | 0.465991698 | 1.5         | 0       | 2.0863  | 1.49    | 1.04    | 1.43    | 2.94    |
| 1261 | TRUE | Empty | Protein PBDC1 OS=Homo sapiens GN=PBDC1 PE=1 SV=1                                     | PBDC1_HUMAN | 26 kDa |      | 0.431683163 | 1.9         | 2.03    | 1.0432  | 1.49    | 0.74522 | 2.14    | 6.85    |
| 1262 | TRUE | Empty | Protein phosphatase 1 regulatory subunit 12A OS=Homo sapiens GN=PPP1R12A PE=1 SV=1   | MYPT1_HUMAN | ?      | TRUE | .649199059  | 0.7         | 0       | 4.1727  | 1.49    | 0.74522 | 1.43    | 1.96    |
| 1263 | TRUE | Empty | Protein phosphatase 1 regulatory subunit 7 OS=Homo sapiens GN=PPP1R7 PE=1 SV=1       | PP1R7_HUMAN | ?      | TRUE | .030278029  | 7.7411342   | 0       | 2.0863  | 0.99746 | 11.178  | 4.57    | 8.81    |
| 1264 | TRUE | Empty | Protein phosphatase 1A OS=Homo sapiens GN=PPM1A PE=1 SV=1                            | PPM1A_HUMAN | ?      | TRUE | .887561457  | 1.2         | 0       | 0       | 2.24    | 0.74522 | 0.84713 | 1.96    |
| 1265 | TRUE | Empty | Protein phosphatase 1B OS=Homo sapiens GN=PPM1B PE=1 SV=1                            | PPM1B_HUMAN | ?      | TRUE | 0.37532752  | 3.2         | 0       | 0       | 0.99746 | 2.57    | 0       | 0.93978 |
| 1266 | TRUE | Empty | Protein phosphatase 1G OS=Homo sapiens GN=PPM1G PE=1 SV=1                            | PPM1G_HUMAN | 59 kDa |      | 0.536766153 | 1.2         | 6.631   | 4.1727  | 5.47    | 10.433  | 6.71    | 3.91    |
| 1267 | TRUE | Empty | Protein phosphatase 1H OS=Homo sapiens GN=PPM1H PE=1 SV=2                            | PPM1H_HUMAN | 56 kDa | TRUE | .373900966  | INF         | 0       | 0       | 0       | 1.04    | 0       | 0       |
| 1268 | TRUE | Empty | Protein phosphatase inhibitor 2-like protein 3 OS=Homo sapiens GN=PPP1R2P3 PE=1 SV=1 | IPP2M_HUMAN | 23 kDa | TRUE | .364606702  | 3.6         | 0       | 0       | 1.49    | 5.65    | 0       | 1.96    |
| 1269 | TRUE | Empty | Protein phosphatase methylesterase 1 OS=Homo sapiens GN=PPME1 PE=1 SV=3              | PPME1_HUMAN | ?      |      | 0.009491394 | 8.260782387 | 0       | 0.99746 | 0       | 3.61    | 1.43    | 2.94    |
| 1270 | TRUE | Empty | Protein phosphatase Slingshot homolog 3 OS=Homo sapiens GN=SSH3 PE=1 SV=2            | SSH3_HUMAN  | ?      | TRUE | 0.00734386  | 8.16784633  | 0       | 0       | 0.99746 | 3.61    | 2.14    | 1.96    |
| 1271 | TRUE | Empty | Protein PML OS=Homo sapiens GN=PML PE=1 SV=3                                         | PML_HUMAN   | ?      | TRUE | .298511407  | INF         | 0       | 0       | 0       | 7.22    | 0       | 0.93978 |
| 1272 | TRUE | Empty | Protein PRRC1 OS=Homo sapiens GN=PRRC1 PE=1 SV=1                                     | PRRC1_HUMAN | ?      |      | 0.339350852 | 0.3         | 2.03    | 22.95   | 3.98    | 3.61    | 0.84713 | 2.94    |
| 1273 | TRUE | Empty | Protein PRRC2A OS=Homo sapiens GN=PRRC2A PE=1 SV=3                                   | PRC2A_HUMAN | ?      | TRUE | .373900966  | 0           | 0       | 0       | 1.49    | 0       | 0       | 0       |
| 1274 | TRUE | Empty | Protein PRRC2B OS=Homo sapiens GN=PRRC2B PE=1 SV=2                                   | PRC2B_HUMAN | ?      | TRUE | .999738023  | 1           | 0       | 2.0863  | 0.99746 | 2.57    | 0.84713 | 0       |
| 1275 | TRUE | Empty | Protein RCC2 OS=Homo sapiens GN=RCC2 PE=1 SV=2                                       | RCC2_HUMAN  | 56 kDa |      | 0.245505962 | 1.8         | 17.683  | 2.0863  | 6.22    | 14.159  | 20.331  | 13.157  |
| 1276 | TRUE | Empty | Protein RTF2 homolog OS=Homo sapiens GN=RTFDC1 PE=1 SV=3                             | RTF2_HUMAN  | 34 kDa |      | 0.506553997 | 0.2         | 0       | 0       | 2.24    | 0.74522 | 0       | 0       |
| 1277 | TRUE | Empty | Protein S100-A11 OS=Homo sapiens GN=S100A11 PE=1 SV=2                                | S10AB_HUMAN | 12 kDa |      | 0.623086548 | 0.8         | 110.52  | 232.63  | 224.43  | 299.58  | 70.312  | 57.327  |
| 1278 | TRUE | Empty | Protein S100-A13 OS=Homo sapiens GN=S100A13 PE=1 SV=1                                | S10AD_HUMAN | 11 kDa |      | 0.87014305  | 0.9         | 2.03    | 10.432  | 15.959  | 9.78    | 10.166  | 6.85    |
| 1279 | TRUE | Empty | Protein S100-A16 OS=Homo sapiens GN=S100A16 PE=1 SV=1                                | S10AG_HUMAN | 12 kDa |      | 0.885364353 | 1.1         | 2.03    | 2.0863  | 4.73    | 6.707   | 2.14    | 0.93978 |
| 1280 | TRUE | Empty | Protein S100-P OS=Homo sapiens GN=S100P PE=1 SV=2                                    | S10OP_HUMAN | 10 kDa |      | 0.005108112 | 0.290191484 | 15.472  | 15.648  | 20.947  | 3.61    | 7.42    | 3.91    |
| 1281 | TRUE | Empty | Protein SEC13 homolog OS=Homo sapiens GN=SEC13 PE=1 SV=3                             | SEC13_HUMAN | ?      |      | 0.292665146 | 26          | 0       | 0       | 0.99746 | 22.357  | 1.43    | 1.96    |

|      |      |       |                                                                                                  |             |        |      |             |             |        |         |         |         |         |         |
|------|------|-------|--------------------------------------------------------------------------------------------------|-------------|--------|------|-------------|-------------|--------|---------|---------|---------|---------|---------|
| 1282 | TRUE | Empty | Protein sel-1 homolog 1 OS=Homo sapiens GN=SEL1L PE=1 SV=3                                       | SE1L1_HUMAN | ?      |      | 0.184606477 | INF         | 0      | 0       | 0       | 0.74522 | 0       | 1.96    |
| 1283 | TRUE | Empty | Protein SET OS=Homo sapiens GN=SET PE=1 SV=3                                                     | SET_HUMAN   | ?      | TRUE | .533267968  | 1.2         | 17.683 | 30.252  | 24.936  | 17.885  | 35.58   | 32.892  |
| 1284 | TRUE | Empty | Protein SGT1 homolog OS=Homo sapiens GN=SUGT1 PE=1 SV=3                                          | SGT1_HUMAN  | ?      |      | 0.092150156 | 2.9         | 0      | 2.0863  | 0.99746 | 2.09    | 4.57    | 1.96    |
| 1285 | TRUE | Empty | Protein SON OS=Homo sapiens GN=SON PE=1 SV=4                                                     | SON_HUMAN   | ?      | TRUE | .177767042  | INF         | 0      | 0       | 0       | 2.57    | 0       | 0.93978 |
| 1286 | TRUE | Empty | Protein TBRG4 OS=Homo sapiens GN=TBRG4 PE=1 SV=1                                                 | TBRG4_HUMAN | ?      |      | 0.136122783 | INF         | 0      | 0       | 0       | 2.09    | 0       | 1.96    |
| 1287 | TRUE | Empty | Protein TFG OS=Homo sapiens GN=TFG PE=1 SV=2                                                     | TFG_HUMAN   | ?      |      | 0.153594946 | 0           | 0      | 2.0863  | 3.98    | 0       | 0       | 0       |
| 1288 | TRUE | Empty | Protein transport protein Sec16A OS=Homo sapiens GN=SEC16A PE=1 SV=3                             | SC16A_HUMAN | ?      | TRUE | .024287925  | 4.98423997  | 0      | 0.99746 | 0       | 1.04    | 2.14    | 0.93978 |
| 1289 | TRUE | Empty | Protein transport protein Sec23A OS=Homo sapiens GN=SEC23A PE=1 SV=2                             | SC23A_HUMAN | ?      | TRUE | .671687192  | 1.4         | 19.893 | 4.1727  | 0.99746 | 7.22    | 7.42    | 19.735  |
| 1290 | TRUE | Empty | Protein transport protein Sec23B OS=Homo sapiens GN=SEC23B PE=1 SV=2                             | SC23B_HUMAN | 86 kDa | TRUE | .001900304  | 17.56581718 | 0      | 0.99746 | 0       | 6.707   | 4.57    | 6.85    |
| 1291 | TRUE | Empty | Protein transport protein Sec24C OS=Homo sapiens GN=SEC24C PE=1 SV=3                             | SC24C_HUMAN | ?      | TRUE | .002199069  | 21.04655826 | 0      | 0.99746 | 0       | 7.22    | 5.0828  | 8.81    |
| 1292 | TRUE | Empty | Protein transport protein Sec31A OS=Homo sapiens GN=SEC31A PE=1 SV=3                             | SC31A_HUMAN | ?      | TRUE | .087730141  | 4.8         | 2.03   | 0       | 1.49    | 2.57    | 8.13    | 9.78    |
| 1293 | TRUE | Empty | Protein unc-45 homolog A OS=Homo sapiens GN=UNC45A PE=1 SV=1                                     | UN45A_HUMAN | ?      |      | 0.931959935 | 1.1         | 13.262 | 0       | 0.99746 | 2.57    | 7.42    | 5.87    |
| 1294 | TRUE | Empty | Protein VPRBP OS=Homo sapiens GN=VPRBP PE=1 SV=3                                                 | VPRBP_HUMAN | ?      | TRUE | .136121777  | INF         | 0      | 0       | 0       | 1.04    | 0       | 0.93978 |
| 1295 | TRUE | Empty | Protein-glutamate O-methyltransferase OS=Homo sapiens GN=ARMT1 PE=1 SV=1                         | ARMT1_HUMAN | 51 kDa |      | 0.136121777 | INF         | 0      | 0       | 0       | 1.04    | 0       | 0.93978 |
| 1296 | TRUE | Empty | Protein-glutamine gamma-glutamyltransferase 2 OS=Homo sapiens GN=TGM2 PE=1 SV=2                  | TGM2_HUMAN  | ?      | TRUE | .036726114  | 4.302764331 | 4.06   | 0       | 0       | 7.22    | 5.99    | 5.87    |
| 1297 | TRUE | Empty | Protein-L-isoaspartate(D-aspartate) O-methyltransferase OS=Homo sapiens GN=PCMT1 PE=1 SV=4       | PIMT_HUMAN  | ?      |      | 0.529563838 | 0.8         | 4.06   | 7.22    | 4.73    | 6.707   | 5.0828  | 0.93978 |
| 1298 | TRUE | Empty | Pseudouridine-5'-phosphatase OS=Homo sapiens GN=HDHD1 PE=1 SV=3                                  | HDHD1_HUMAN | ?      |      | 0.84210842  | 1.1         | 0      | 1.0432  | 1.49    | 0.74522 | 0.84713 | 1.96    |
| 1299 | TRUE | Empty | Pseudouridylyl synthase 7 homolog OS=Homo sapiens GN=PUS7 PE=1 SV=2                              | PUS7_HUMAN  | 75 kDa |      | 0.335303639 | 1.6         | 2.03   | 0       | 1.49    | 2.57    | 1.43    | 2.94    |
| 1300 | TRUE | Empty | Pterin-4-alpha-carbinolamine dehydratase OS=Homo sapiens GN=PCBD1 PE=1 SV=2                      | PHS_HUMAN   | 12 kDa |      | 0.443382579 | 0.5         | 0      | 6.259   | 5.47    | 2.09    | 3.85    | 0       |
| 1301 | TRUE | Empty | Purine nucleoside phosphorylase OS=Homo sapiens GN=PNP PE=1 SV=2                                 | PNPH_HUMAN  | 32 kDa | TRUE | .909133008  | 0.9         | 4.06   | 31.295  | 17.954  | 12.669  | 22.025  | 15.976  |
| 1302 | TRUE | Empty | Puromycin-sensitive aminopeptidase OS=Homo sapiens GN=NPEPPS PE=1 SV=2                           | PSA_HUMAN   | ?      | TRUE | .154484089  | 2.1         | 19.893 | 2.0863  | 4.73    | 16.395  | 22.025  | 18.796  |
| 1303 | TRUE | Empty | Putative deoxyribonuclease TATDN1 OS=Homo sapiens GN=TATDN1 PE=1 SV=2                            | TATD1_HUMAN | ?      |      | 0.895168508 | 1.1         | 0      | 3.1295  | 6.22    | 2.09    | 4.57    | 3.91    |
| 1304 | TRUE | Empty | Putative elongation factor 1-alpha-like 3 OS=Homo sapiens GN=EEF1A1P5 PE=5 SV=1                  | EF1A3_HUMAN | 50 kDa | TRUE | .394209207  | 1.4         | 258.61 | 163.78  | 57.853  | 315.23  | 168.58  | 204.87  |
| 1305 | TRUE | Empty | Putative helicase MOV-10 OS=Homo sapiens GN=MOV10 PE=1 SV=2                                      | MOV10_HUMAN | ?      |      | 0.08423303  | 7.9         | 0      | 0       | 0.99746 | 0.74522 | 3.85    | 3.91    |
| 1306 | TRUE | Empty | Putative oxidoreductase GLYR1 OS=Homo sapiens GN=GLYR1 PE=1 SV=3                                 | GLYR1_HUMAN | ?      | TRUE | .373900966  | INF         | 0      | 0       | 0       | 0       | 3.85    | 0       |
| 1307 | TRUE | Empty | Putative RNA-binding protein 15 OS=Homo sapiens GN=RBM15 PE=1 SV=2                               | RBM15_HUMAN | ?      | TRUE | .273088108  | 0.4         | 2.03   | 2.0863  | 3.98    | 0       | 3.85    | 0       |
| 1308 | TRUE | Empty | Putative RNA-binding protein Luc7-like 1 OS=Homo sapiens GN=LUC7L PE=1 SV=1                      | LUC7L_HUMAN | ?      | TRUE | .836458914  | 0.9         | 2.03   | 2.0863  | 5.47    | 2.57    | 3.85    | 3.91    |
| 1309 | TRUE | Empty | Putative RNA-binding protein Luc7-like 2 OS=Homo sapiens GN=LUC7L2 PE=1 SV=2                     | LC7L2_HUMAN | ?      | TRUE | .590404329  | 1.3         | 2.03   | 10.432  | 5.47    | 5.65    | 6.71    | 12.217  |
| 1310 | TRUE | Empty | Putative small nuclear ribonucleoprotein G-like protein 15 OS=Homo sapiens GN=SNRPGP15 PE=5 SV=2 | RUXGL_HUMAN | 9 kDa  | TRUE | .409914111  | 0.6         | 2.03   | 10.432  | 3.98    | 2.57    | 5.0828  | 1.96    |

|      |      |       |                                                                                                                   |             |         |      |             |             |        |        |         |         |         |         |
|------|------|-------|-------------------------------------------------------------------------------------------------------------------|-------------|---------|------|-------------|-------------|--------|--------|---------|---------|---------|---------|
| 1311 | TRUE | Empty | Pyridoxal kinase OS=Homo sapiens GN=PDXK PE=1 SV=1                                                                | PDXK_HUMAN  | ?       |      | 0.053434523 | 0.8         | 15.472 | 17.734 | 19.949  | 12.669  | 15.248  | 12.217  |
| 1312 | TRUE | Empty | Pyridoxal-dependent decarboxylase domain-containing protein 1 OS=Homo sapiens GN=PDXDC1 PE=1 SV=2                 | PDXD1_HUMAN | ?       |      | 0.058249636 | 16          | 2.03   | 0      | 0       | 6.707   | 8.13    | 19.735  |
| 1313 | TRUE | Empty | Pyridoxine-5'-phosphate oxidase OS=Homo sapiens GN=PNPO PE=1 SV=1                                                 | PNPO_HUMAN  | ?       |      | 0.282866176 | 0.2         | 0      | 9.86   | 23.939  | 2.09    | 2.14    | 1.96    |
| 1314 | TRUE | Empty | Pyrroline-5-carboxylate reductase 3 OS=Homo sapiens GN=PYCRL PE=1 SV=3                                            | P5CR3_HUMAN | ?       |      | 0.75684189  | 1.2         | 0      | 5.59   | 2.24    | 4.13    | 1.43    | 3.91    |
| 1315 | TRUE | Empty | Pyruvate carboxylase, mitochondrial OS=Homo sapiens GN=PC PE=1 SV=2                                               | PYC_HUMAN   | ?       | TRUE | .117185082  | INF         | 0      | 0      | 0       | 0       | 2.14    | 2.94    |
| 1316 | TRUE | Empty | Pyruvate dehydrogenase E1 component subunit alpha, somatic form, mitochondrial OS=Homo sapiens GN=PDHA1 PE=1 SV=3 | ODPA_HUMAN  | ?       | TRUE | .036881472  | 1.81383015  | 2.03   | 3.1295 | 1.49    | 5.65    | 3.85    | 4.89    |
| 1317 | TRUE | Empty | Pyruvate dehydrogenase E1 component subunit beta, mitochondrial OS=Homo sapiens GN=PDHB PE=1 SV=3                 | ODPB_HUMAN  | ?       |      | 0.349076148 | 2.3         | 4.06   | 1.0432 | 0       | 2.09    | 7.42    | 1.96    |
| 1318 | TRUE | Empty | Pyruvate kinase PKM OS=Homo sapiens GN=PKM PE=1 SV=4                                                              | KPYM_HUMAN  | ?       | TRUE | .009968533  | 1.716801796 | 174.62 | 109.53 | 116.7   | 234     | 229.57  | 224.61  |
| 1319 | TRUE | Empty | Rab GDP dissociation inhibitor alpha OS=Homo sapiens GN=GDI1 PE=1 SV=2                                            | GDIA_HUMAN  | 51 kDa  | TRUE | .944735626  | 1           | 37.575 | 9.86   | 22.942  | 20.121  | 26.261  | 25.374  |
| 1320 | TRUE | Empty | Rab GDP dissociation inhibitor beta OS=Homo sapiens GN=GDI2 PE=1 SV=2                                             | GDIB_HUMAN  | ?       | TRUE | 0.16259127  | 1.6         | 50.837 | 16.691 | 36.906  | 46.204  | 64.382  | 51.688  |
| 1321 | TRUE | Empty | Rab GTPase-activating protein 1 OS=Homo sapiens GN=RABGAP1 PE=1 SV=3                                              | RBGP1_HUMAN | ?       | TRUE | .059107988  | INF         | 0      | 0      | 0       | 1.04    | 3.85    | 0.93978 |
| 1322 | TRUE | Empty | Rab9 effector protein with kelch motifs OS=Homo sapiens GN=RABEPK PE=1 SV=1                                       | RABEK_HUMAN | ?       |      | 0.373900966 | 0           | 0      | 5.59   | 0       | 0       | 0       | 0       |
| 1323 | TRUE | Empty | Rab-like protein 6 OS=Homo sapiens GN=RABL6 PE=1 SV=2                                                             | RABL6_HUMAN | ?       |      | 0.491737711 | 0.6         | 0      | 2.0863 | 1.49    | 0.74522 | 0.84713 | 0.93978 |
| 1324 | TRUE | Empty | RAC-alpha serine/threonine-protein kinase OS=Homo sapiens GN=AKT1 PE=1 SV=2                                       | AKT1_HUMAN  | ?       | TRUE | .373900966  | INF         | 0      | 0      | 0       | 2.57    | 0       | 0       |
| 1325 | TRUE | Empty | Radixin OS=Homo sapiens GN=RDYX PE=1 SV=1                                                                         | RADI_HUMAN  | ?       | TRUE | .614564278  | 0.9         | 33.155 | 14.604 | 24.936  | 15.65   | 26.261  | 20.675  |
| 1326 | TRUE | Empty | Regulator complex protein LAMTOR1 OS=Homo sapiens GN=LAMTOR1 PE=1 SV=2                                            | LTOR1_HUMAN | 18 kDa  |      | 0.261417449 | INF         | 0      | 0      | 0       | 0.74522 | 0       | 3.91    |
| 1327 | TRUE | Empty | Regulator complex protein LAMTOR2 OS=Homo sapiens GN=LAMTOR2 PE=1 SV=1                                            | LTOR2_HUMAN | ?       |      | 0.605622517 | 0.7         | 0      | 4.1727 | 5.47    | 1.04    | 1.43    | 3.91    |
| 1328 | TRUE | Empty | Ran GTPase-activating protein 1 OS=Homo sapiens GN=RANGAP1 PE=1 SV=1                                              | RAGP1_HUMAN | 64 kDa  | TRUE | .000505265  | 1.862973854 | 2.03   | 2.0863 | 1.49    | 3.61    | 4.57    | 3.91    |
| 1329 | TRUE | Empty | Ran-specific GTPase-activating protein OS=Homo sapiens GN=RANBP1 PE=1 SV=1                                        | RANG_HUMAN  | ?       |      | 0.269361398 | 0.7         | 4.06   | 8.54   | 4.73    | 3.61    | 2.14    | 5.87    |
| 1330 | TRUE | Empty | Ras GTPase-activating protein-binding protein 1 OS=Homo sapiens GN=G3BP1 PE=1 SV=1                                | G3BP1_HUMAN | ?       | TRUE | .399202426  | 0.6         | 2.03   | 25.036 | 16.957  | 7.22    | 10.166  | 7.83    |
| 1331 | TRUE | Empty | Ras GTPase-activating protein-binding protein 2 OS=Homo sapiens GN=G3BP2 PE=1 SV=2                                | G3BP2_HUMAN | ?       | TRUE | .596029125  | 0.6         | 0      | 2.0863 | 1.49    | 0       | 1.43    | 0.93978 |
| 1332 | TRUE | Empty | Ras GTPase-activating-like protein IQGAP1 OS=Homo sapiens GN=IQGAP1 PE=1 SV=1                                     | IQGA1_HUMAN | 189 kDa | TRUE | .014424286  | 2.662446077 | 11.052 | 3.1295 | 7.97    | 16.395  | 22.873  | 19.735  |
| 1333 | TRUE | Empty | Ras-related C3 botulinum toxin substrate 1 OS=Homo sapiens GN=RAC1 PE=1 SV=1                                      | RAC1_HUMAN  | ?       | TRUE | .002569388  | 13.84930982 | 0      | 1.0432 | 0       | 3.61    | 5.0828  | 5.87    |
| 1334 | TRUE | Empty | Ras-related GTP-binding protein A OS=Homo sapiens GN=RRAGA PE=1 SV=1                                              | RRAGA_HUMAN | 37 kDa  | TRUE | .889987491  | 0.9         | 0      | 3.1295 | 3.98    | 2.09    | 1.43    | 1.96    |
| 1335 | TRUE | Empty | Ras-related protein Rab-10 OS=Homo sapiens GN=RAB10 PE=1 SV=1                                                     | RAB10_HUMAN | 23 kDa  | TRUE | .514775693  | 1.8         | 17.683 | 0      | 1.49    | 5.17    | 7.42    | 22.555  |
| 1336 | TRUE | Empty | Ras-related protein Rab-11A OS=Homo sapiens GN=RAB11A PE=1 SV=3                                                   | RB11A_HUMAN | ?       |      | 0.005441067 | 2.233254261 | 4.06   | 2.0863 | 3.98    | 7.22    | 8.13    | 7.83    |
| 1337 | TRUE | Empty | Ras-related protein Rab-14 OS=Homo sapiens GN=RAB14 PE=1 SV=4                                                     | RAB14_HUMAN | 24 kDa  | TRUE | .192368921  | 3.3         | 19.893 | 0      | 0.99746 | 13.414  | 16.943  | 39.471  |

|      |      |       |                                                                                                 |                |        |      |             |             |        |         |         |         |         |         |
|------|------|-------|-------------------------------------------------------------------------------------------------|----------------|--------|------|-------------|-------------|--------|---------|---------|---------|---------|---------|
| 1338 | TRUE | Empty | Ras-related protein Rab-18 OS=Homo sapiens GN=RAB18 PE=1 SV=1                                   | RAB18_HUMAN    | ?      |      | 0.055057501 | INF         | 0      | 0       | 0       | 0.74522 | 2.14    | 3.91    |
| 1339 | TRUE | Empty | Ras-related protein Rab-1A OS=Homo sapiens GN=RAB1A PE=1 SV=3                                   | RAB1A_HUMAN    | ?      | TRUE | .371623559  | 2.2         | 15.472 | 0       | 0.99746 | 7.22    | 8.13    | 19.735  |
| 1340 | TRUE | Empty | Ras-related protein Rab-1B OS=Homo sapiens GN=RAB1B PE=1 SV=1                                   | RAB1B_HUMAN    | 22 kDa | TRUE | .251700357  | 2.7         | 15.472 | 0       | 0       | 12.669  | 7.42    | 21.615  |
| 1341 | TRUE | Empty | Ras-related protein Rab-21 OS=Homo sapiens GN=RAB21 PE=1 SV=3                                   | RAB21_HUMAN    | 24 kDa | TRUE | .082848332  | INF         | 0      | 0       | 0       | 1.04    | 0.84713 | 3.91    |
| 1342 | TRUE | Empty | Ras-related protein Rab-2A OS=Homo sapiens GN=RAB2A PE=1 SV=1                                   | RAB2A_HUMAN    | ?      | TRUE | .033087169  | 13.92306458 | 0      | 0.99746 | 0       | 2.09    | 3.85    | 7.83    |
| 1343 | TRUE | Empty | Ras-related protein Rab-5A OS=Homo sapiens GN=RAB5A PE=1 SV=2                                   | RAB5A_HUMAN    | ?      | TRUE | .293072575  | 2.5         | 6.631  | 0       | 0       | 2.09    | 5.0828  | 8.81    |
| 1344 | TRUE | Empty | Ras-related protein Rab-5C OS=Homo sapiens GN=RAB5C PE=1 SV=2                                   | RAB5C_HUMAN    | ?      | TRUE | 0.22467013  | 2.7         | 8.13   | 0       | 0       | 4.13    | 11.013  | 8.81    |
| 1345 | TRUE | Empty | Ras-related protein Rab-6A OS=Homo sapiens GN=RAB6A PE=1 SV=3                                   | RAB6A_HUMAN    | ?      | TRUE | .410600111  | 2.9         | 11.052 | 0       | 0       | 3.61    | 4.57    | 24.434  |
| 1346 | TRUE | Empty | Ras-related protein Rab-7a OS=Homo sapiens GN=RAB7A PE=1 SV=1                                   | RAB7A_HUMAN    | 23 kDa |      | 0.013735804 | 6.749129078 | 4.06   | 0       | 0       | 7.22    | 10.166  | 12.217  |
| 1347 | TRUE | Empty | Ras-related protein Rap-1b OS=Homo sapiens GN=RAP1B PE=1 SV=1                                   | RAP1B_HUMAN    | ?      | TRUE | .689973084  | 1.2         | 8.13   | 2.0863  | 7.97    | 4.13    | 9.85    | 8.81    |
| 1348 | TRUE | Empty | Receptor expression-enhancing protein 5 OS=Homo sapiens GN=REEP5 PE=1 SV=3                      | REEP5_HUMAN    | ?      | TRUE | .204979476  | 3.2         | 4.06   | 0       | 0       | 6.707   | 1.43    | 5.87    |
| 1349 | TRUE | Empty | Receptor expression-enhancing protein 6 OS=Homo sapiens GN=REEP6 PE=1 SV=1                      | REEP6_HUMAN    | 21 kDa |      | 0.983254095 | 1           | 4.06   | 0       | 0       | 0.74522 | 1.43    | 1.96    |
| 1350 | TRUE | Empty | Receptor-type tyrosine-protein phosphatase F OS=Homo sapiens GN=PTPRF PE=1 SV=2                 | PTPRF_HUMAN    | ?      | TRUE | .178329558  | 0           | 0      | 2.0863  | 4.73    | 0       | 0       | 0       |
| 1351 | TRUE | Empty | Receptor-type tyrosine-protein phosphatase kappa OS=Homo sapiens GN=PTPRK PE=1 SV=2             | PTPRK_HUMAN    | ?      | TRUE | 0.32064321  | 0.2         | 0      | 3.1295  | 0.99746 | 0       | 0.84713 | 0       |
| 1352 | TRUE | Empty | Regulation of nuclear pre-mRNA domain-containing protein 1B OS=Homo sapiens GN=RPRD1B PE=1 SV=1 | RPR1B_HUMAN    | 37 kDa | TRUE | .112328326  | 2.2         | 0      | 2.0863  | 3.98    | 3.61    | 5.0828  | 4.89    |
| 1353 | TRUE | Empty | Regulation of nuclear pre-mRNA domain-containing protein 2 OS=Homo sapiens GN=RPRD2 PE=1 SV=1   | RPRD2_HUMAN    | ?      |      | 0.002281953 | 6.766587131 | 0      | 0.99746 | 0       | 2.57    | 1.43    | 2.94    |
| 1354 | TRUE | Empty | Regulator of chromosome condensation OS=Homo sapiens GN=RCC1 PE=1 SV=1                          | RCC1_HUMAN     | ?      |      | 0.509594459 | 0.8         | 4.06   | 7.22    | 6.22    | 6.707   | 5.99    | 2.94    |
| 1355 | TRUE | Empty | Regulator of microtubule dynamics protein 1 OS=Homo sapiens GN=RMDN1 PE=1 SV=1                  | RMD1_HUMAN     | ?      | TRUE | .036028473  | 3.329176746 | 2.03   | 0       | 0.99746 | 4.13    | 3.85    | 2.94    |
| 1356 | TRUE | Empty | Regulator of nonsense transcripts 1 OS=Homo sapiens GN=UPF1 PE=1 SV=2                           | RENT1_HUMAN    | ?      |      | 0.060183159 | 2.6         | 0      | 9.86    | 11.969  | 14.159  | 22.873  | 18.796  |
| 1357 | TRUE | Empty | RelA-associated inhibitor OS=Homo sapiens GN=PPP1R13L PE=1 SV=4                                 | IASPP_HUMAN    | 89 kDa | TRUE | .116315977  | 0           | 0      | 2.0863  | 1.49    | 0       | 0       | 0       |
| 1358 | TRUE | Empty | Replication factor C subunit 5 OS=Homo sapiens GN=RFC5 PE=1 SV=1                                | RFC5_HUMAN     | ?      | TRUE | .136121777  | INF         | 0      | 0       | 0       | 1.04    | 0       | 0.93978 |
| 1359 | TRUE | Empty | Replication protein A 14 kDa subunit OS=Homo sapiens GN=RPA3 PE=1 SV=1                          | RFA3_HUMAN     | 14 kDa |      | 0.73851057  | 0.8         | 0      | 15.648  | 5.47    | 5.65    | 6.71    | 4.89    |
| 1360 | TRUE | Empty | Replication protein A 70 kDa DNA-binding subunit OS=Homo sapiens GN=RPA1 PE=1 SV=2              | RFA1_HUMAN     | 68 kDa | TRUE | .285577572  | INF         | 0      | 0       | 0       | 0       | 0.84713 | 5.87    |
| 1361 | TRUE | Empty | Reticulocalbin-2 OS=Homo sapiens GN=RCN2 PE=1 SV=1                                              | RCN2_HUMAN     | ?      |      | 0.177767042 | INF         | 0      | 0       | 0       | 2.57    | 0       | 0.93978 |
| 1362 | TRUE | Empty | Reticulon-4 OS=Homo sapiens GN=RTN4 PE=1 SV=2                                                   | RTN4_HUMAN     | ?      |      | 0.108419887 | 3.6         | 6.631  | 0       | 0       | 11.178  | 5.99    | 6.85    |
| 1363 | TRUE | Empty | Retinoblastoma-binding protein 5 OS=Homo sapiens GN=RBBP5 PE=1 SV=2                             | RBBP5_HUMAN    | ?      |      | 0.098392517 | 0.4         | 2.03   | 4.1727  | 2.24    | 0.74522 | 2.14    | 0       |
| 1364 | TRUE | Empty | RHG30_HUMAN-DECOY                                                                               | RHG30_HUMAN-DE | ?      | TRUE | .440918012  | 0.6         | 4.06   | 2.0863  | 1.49    | 0       | 3.85    | 1.96    |
| 1365 | TRUE | Empty | Rho GDP-dissociation inhibitor 1 OS=Homo sapiens GN=ARHGDI1 PE=1 SV=3                           | GDIR1_HUMAN    | ?      |      | 0.510421604 | 0.7         | 13.262 | 4.1727  | 8.71    | 2.57    | 8.13    | 8.81    |

|      |      |       |                                                                                                |             |         |      |             |             |        |         |         |         |         |         |
|------|------|-------|------------------------------------------------------------------------------------------------|-------------|---------|------|-------------|-------------|--------|---------|---------|---------|---------|---------|
| 1366 | TRUE | Empty | Rho GTPase-activating protein 1 OS=Homo sapiens GN=ARHGAP1<br>PE=1 SV=1                        | RHG01_HUMAN | 50 kDa  | TRUE | .003698302  | 15.58849478 | 0      | 0.99746 | 0       | 6.707   | 5.0828  | 3.91    |
| 1367 | TRUE | Empty | Rho-associated protein kinase 2 OS=Homo sapiens GN=ROCK2<br>PE=1 SV=4                          | ROCK2_HUMAN | 161 kDa | TRUE | .169759736  | INF         | 0      | 0       | 0       | 0       | 0.84713 | 1.96    |
| 1368 | TRUE | Empty | Rhomboid domain-containing protein 2 OS=Homo sapiens<br>GN=RHBD2 PE=2 SV=2                     | RHBD2_HUMAN | ?       | TRUE | .896568956  | 0.8         | 6.631  | 0       | 0       | 2.57    | 3.85    | 0       |
| 1369 | TRUE | Empty | Ribonuclease inhibitor OS=Homo sapiens GN=RNH1 PE=1 SV=2                                       | RINI_HUMAN  | 50 kDa  | TRUE | .008070508  | 1.805263787 | 11.052 | 10.432  | 6.22    | 15.65   | 16.943  | 18.796  |
| 1370 | TRUE | Empty | Ribonuclease P protein subunit p40 OS=Homo sapiens GN=RPP40<br>PE=1 SV=3                       | RPP40_HUMAN | ?       |      | 0.172538338 | INF         | 0      | 0       | 0       | 0.74522 | 1.43    | 0       |
| 1371 | TRUE | Empty | Ribonuclease UK114 OS=Homo sapiens GN=HRSP12 PE=1 SV=1                                         | UK114_HUMAN | 14 kDa  |      | 0.003809927 | 0.3238427   | 6.631  | 6.259   | 7.97    | 1.04    | 3.85    | 1.96    |
| 1372 | TRUE | Empty | Ribonucleoprotein PTB-binding 1 OS=Homo sapiens GN=RAVER1<br>PE=1 SV=1                         | RAVR1_HUMAN | ?       |      | 0.151042322 | 2.4         | 0      | 4.1727  | 1.49    | 2.09    | 5.0828  | 6.85    |
| 1373 | TRUE | Empty | Ribonucleoside-diphosphate reductase large subunit OS=Homo<br>sapiens GN=RRM1 PE=1 SV=1        | RIR1_HUMAN  | 90 kDa  | TRUE | .147672906  | INF         | 0      | 0       | 0       | 0       | 1.43    | 0.93978 |
| 1374 | TRUE | Empty | Ribonucleoside-diphosphate reductase subunit M2 B OS=Homo<br>sapiens GN=RRM2B PE=1 SV=1        | RIR2B_HUMAN | ?       | TRUE | .652238853  | 1.4         | 0      | 3.1295  | 7.97    | 2.57    | 8.13    | 4.89    |
| 1375 | TRUE | Empty | Ribonucleoside-diphosphate reductase subunit M2 OS=Homo<br>sapiens GN=RRM2 PE=1 SV=1           | RIR2_HUMAN  | ?       | TRUE | 0.69841102  | 1.4         | 0      | 1.0432  | 6.22    | 1.04    | 5.99    | 3.91    |
| 1376 | TRUE | Empty | Ribose-phosphate pyrophosphokinase 1 OS=Homo sapiens<br>GN=PRPS1 PE=1 SV=2                     | PRPS1_HUMAN | ?       | TRUE | .080775509  | INF         | 0      | 0       | 0       | 5.65    | 2.14    | 0.93978 |
| 1377 | TRUE | Empty | Ribose-phosphate pyrophosphokinase 2 OS=Homo sapiens<br>GN=PRPS2 PE=1 SV=2                     | PRPS2_HUMAN | ?       | TRUE | .029630168  | 15.38407555 | 0      | 0       | 0.99746 | 8.74    | 3.85    | 3.91    |
| 1378 | TRUE | Empty | Ribosomal L1 domain-containing protein 1 OS=Homo sapiens<br>GN=RSL1D1 PE=1 SV=3                | RL1D1_HUMAN | ?       | TRUE | .088050338  | 3.3         | 0      | 0       | 1.49    | 2.57    | 2.14    | 1.96    |
| 1379 | TRUE | Empty | Ribosomal protein S6 kinase beta-1 OS=Homo sapiens<br>GN=RPS6KB1 PE=1 SV=2                     | KS6B1_HUMAN | ?       | TRUE | .040108886  | 3.081788843 | 2.03   | 1.0432  | 0       | 3.61    | 2.14    | 3.91    |
| 1380 | TRUE | Empty | Ribosome biogenesis protein BRX1 homolog OS=Homo sapiens<br>GN=BRX1 PE=1 SV=2                  | BRX1_HUMAN  | 41 kDa  |      | 0.121394667 | INF         | 0      | 0       | 0       | 1.04    | 0       | 1.96    |
| 1381 | TRUE | Empty | Ribosome-binding protein 1 OS=Homo sapiens GN=RRBP1 PE=1<br>SV=4                               | RRBP1_HUMAN | ?       | TRUE | 0.21599088  | 5.1         | 0      | 0       | 0.99746 | 2.57    | 0       | 2.94    |
| 1382 | TRUE | Empty | RING finger protein 113A OS=Homo sapiens GN=RNF113A PE=1<br>SV=1                               | R113A_HUMAN | 39 kDa  | TRUE | .943452794  | 0.9         | 0      | 2.0863  | 1.49    | 2.09    | 0.84713 | 0       |
| 1383 | TRUE | Empty | RNA-binding motif protein, X chromosome OS=Homo sapiens<br>GN=RBMX PE=1 SV=3                   | RBMX_HUMAN  | ?       | TRUE | .312246472  | 1.7         | 2.03   | 5.59    | 20.947  | 14.159  | 17.79   | 16.916  |
| 1384 | TRUE | Empty | RNA-binding motif, single-stranded-interacting protein 1<br>OS=Homo sapiens GN=RBMS1 PE=1 SV=3 | RBMS1_HUMAN | ?       | TRUE | .443532528  | 0.4         | 0      | 1.0432  | 2.24    | 0.74522 | 0       | 0.93978 |
| 1385 | TRUE | Empty | RNA-binding protein 10 OS=Homo sapiens GN=RBM10 PE=1 SV=3                                      | RBM10_HUMAN | ?       | TRUE | .527021212  | 0.6         | 0      | 3.1295  | 4.73    | 2.09    | 0.84713 | 0.93978 |
| 1386 | TRUE | Empty | RNA-binding protein 12 OS=Homo sapiens GN=RBM12 PE=1 SV=1                                      | RBM12_HUMAN | 97 kDa  |      | 0.997985727 | 1           | 0      | 5.59    | 0.99746 | 0.74522 | 1.43    | 3.91    |
| 1387 | TRUE | Empty | RNA-binding protein 14 OS=Homo sapiens GN=RBM14 PE=1 SV=2                                      | RBM14_HUMAN | ?       |      | 0.837727931 | 0.9         | 0      | 15.648  | 17.954  | 10.433  | 11.86   | 7.83    |
| 1388 | TRUE | Empty | RNA-binding protein 25 OS=Homo sapiens GN=RBM25 PE=1 SV=3                                      | RBM25_HUMAN | ?       | TRUE | 0.03298905  | 4.932903028 | 2.03   | 1.0432  | 0       | 3.61    | 7.42    | 4.89    |
| 1389 | TRUE | Empty | RNA-binding protein 3 OS=Homo sapiens GN=RBM3 PE=1 SV=1                                        | RBM3_HUMAN  | 17 kDa  | TRUE | .867356704  | 1.1         | 6.631  | 19.82   | 0.99746 | 8.26    | 9.85    | 12.217  |
| 1390 | TRUE | Empty | RNA-binding protein 39 OS=Homo sapiens GN=RBM39 PE=1 SV=2                                      | RBM39_HUMAN | ?       | TRUE | .847477452  | 1.1         | 4.06   | 12.518  | 11.969  | 14.904  | 5.99    | 10.338  |
| 1391 | TRUE | Empty | RNA-binding protein 4 OS=Homo sapiens GN=RBM4 PE=1 SV=1                                        | RBM4_HUMAN  | ?       | TRUE | .383231094  | 1.7         | 0      | 6.259   | 6.22    | 11.178  | 5.0828  | 5.87    |

|      |      |       |                                                                                         |              |         |      |             |             |         |        |         |         |         |         |
|------|------|-------|-----------------------------------------------------------------------------------------|--------------|---------|------|-------------|-------------|---------|--------|---------|---------|---------|---------|
| 1392 | TRUE | Empty | RNA-binding protein 8A OS=Homo sapiens GN=RBM8A PE=1 SV=1                               | RBM8A_HUMAN  | ?       |      | 0.745622251 | 0.8         | 0       | 4.1727 | 4.73    | 2.09    | 1.43    | 2.94    |
| 1393 | TRUE | Empty | RNA-binding protein EWS OS=Homo sapiens GN=EWSR1 PE=1 SV=1                              | EWS_HUMAN    | ?       | TRUE | .454951932  | 0.7         | 4.06    | 5.59   | 9.46    | 1.04    | 8.13    | 2.94    |
| 1394 | TRUE | Empty | RNA-binding protein FUS OS=Homo sapiens GN=FUS PE=1 SV=1                                | FUS_HUMAN    | ?       | TRUE | .366023187  | 0.5         | 6.631   | 30.252 | 48.875  | 18.63   | 8.13    | 19.735  |
| 1395 | TRUE | Empty | RNA-binding protein Musashi homolog 2 OS=Homo sapiens GN=MSI2 PE=1 SV=1                 | MSI2H_HUMAN  | ?       | TRUE | .386382921  | 0.4         | 0       | 6.259  | 3.98    | 0.74522 | 3.85    | 0       |
| 1396 | TRUE | Empty | RNA-binding protein Raly OS=Homo sapiens GN=RALY PE=1 SV=1                              | RALY_HUMAN   | ?       |      | 0.093700402 | 1.2         | 4.06    | 6.259  | 5.47    | 7.22    | 6.71    | 6.85    |
| 1397 | TRUE | Empty | RNA-binding protein with serine-rich domain 1 OS=Homo sapiens GN=RNPS1 PE=1 SV=1        | RNPS1_HUMAN  | ?       | TRUE | .589536314  | 0.6         | 0       | 6.259  | 2.24    | 1.04    | 3.85    | 0.93978 |
| 1398 | TRUE | Empty | rRNA 2'-O-methyltransferase fibrillarin OS=Homo sapiens GN=FBRL PE=1 SV=2               | FBRL_HUMAN   | 34 kDa  | TRUE | .150322159  | 3.5         | 0       | 1.0432 | 0.99746 | 0.74522 | 2.14    | 3.91    |
| 1399 | TRUE | Empty | RUN and FYVE domain-containing protein 1 OS=Homo sapiens GN=RUFY1 PE=1 SV=2             | RUFY1_HUMAN  | ?       | TRUE | .373900966  | INF         | 0       | 0      | 0       | 0       | 0       | 3.91    |
| 1400 | TRUE | Empty | RuvB-like 1 OS=Homo sapiens GN=RUVBL1 PE=1 SV=1                                         | RUVB1_HUMAN  | ?       | TRUE | .009126578  | 1.85236109  | 13.262  | 14.604 | 10.972  | 20.121  | 24.567  | 27.254  |
| 1401 | TRUE | Empty | RuvB-like 2 OS=Homo sapiens GN=RUVBL2 PE=1 SV=3                                         | RUVB2_HUMAN  | ?       |      | 0.018063231 | 3.414961062 | 6.631   | 1.0432 | 1.49    | 8.26    | 11.86   | 12.217  |
| 1402 | TRUE | Empty | Saccharopine dehydrogenase-like oxidoreductase OS=Homo sapiens GN=SCCPDH PE=1 SV=1      | SCPDL_HUMAN  | 47 kDa  | TRUE | .868541699  | 1.1         | 0       | 1.0432 | 1.49    | 0.74522 | 1.43    | 0.93978 |
| 1403 | TRUE | Empty | S-adenosylmethionine synthase isoform type-2 OS=Homo sapiens GN=MAT2A PE=1 SV=1         | METK2_HUMAN  | ?       | TRUE | .312675811  | 1.4         | 6.631   | 4.1727 | 3.98    | 5.65    | 10.166  | 5.87    |
| 1404 | TRUE | Empty | SAP domain-containing ribonucleoprotein OS=Homo sapiens GN=SARNP PE=1 SV=3              | SARNP_HUMAN  | 24 kDa  |      | 0.647890202 | 0.6         | 0       | 2.0863 | 7.97    | 0       | 3.85    | 2.94    |
| 1405 | TRUE | Empty | SAP30-binding protein OS=Homo sapiens GN=SAP30BP PE=1 SV=1                              | S30BP_HUMAN  | ?       | TRUE | .297675591  | 0.2         | 0       | 2.0863 | 0.99746 | 0.74522 | 0       | 0       |
| 1406 | TRUE | Empty | Sarcoplasmic/endoplasmic reticulum calcium ATPase 2 OS=Homo sapiens GN=ATP2A2 PE=1 SV=1 | AT2A2_HUMAN  | ?       | TRUE | .123070893  | 5.2         | 4.06    | 0      | 0       | 8.74    | 2.14    | 12.217  |
| 1407 | TRUE | Empty | Sarcoplasmic/endoplasmic reticulum calcium ATPase 3 OS=Homo sapiens GN=ATP2A3 PE=1 SV=2 | AT2A3_HUMAN  | ?       | TRUE | .289763189  | 2.5         | 4.06    | 0      | 0       | 4.13    | 1.43    | 4.89    |
| 1408 | TRUE | Empty | Scaffold attachment factor B1 OS=Homo sapiens GN=SAFB PE=1 SV=4                         | SAFB1_HUMAN  | ?       | TRUE | .516029961  | 0.6         | 0       | 16.691 | 9.46    | 3.61    | 6.71    | 5.87    |
| 1409 | TRUE | Empty | Scaffold attachment factor B2 OS=Homo sapiens GN=SAFB2 PE=1 SV=1                        | SAFB2_HUMAN  | ?       | TRUE | .426409312  | 0.5         | 0       | 8.54   | 4.73    | 2.09    | 0.84713 | 2.94    |
| 1410 | TRUE | Empty | SCY1-like protein 2 OS=Homo sapiens GN=SCYL2 PE=1 SV=1                                  | SCYL2_HUMAN  | 104 kDa | TRUE | .147672906  | INF         | 0       | 0      | 0       | 0       | 1.43    | 0.93978 |
| 1411 | TRUE | Empty | SEC23-interacting protein OS=Homo sapiens GN=SEC23IP PE=1 SV=1                          | S23IP_HUMAN  | ?       | TRUE | .358410794  | 9.9         | 0       | 0      | 0.99746 | 8.26    | 0       | 0.93978 |
| 1412 | TRUE | Empty | Secernin-1 OS=Homo sapiens GN=SCRN1 PE=1 SV=2                                           | SCRN1_HUMAN  | ?       |      | 0.698039406 | 1.4         | 0       | 2.0863 | 1.49    | 2.09    | 2.14    | 0       |
| 1413 | TRUE | Empty | Secretory carrier-associated membrane protein 3 OS=Homo sapiens GN=SCAMP3 PE=1 SV=3     | SCAM3_HUMAN  | ?       |      | 0.010315957 | 7.717903475 | 0       | 0      | 0.99746 | 1.04    | 3.85    | 2.94    |
| 1414 | TRUE | Empty | Selenide, water dikinase 1 OS=Homo sapiens GN=SEPHS1 PE=1 SV=2                          | SPS1_HUMAN   | ?       | TRUE | .290484135  | 0.3         | 0       | 23.993 | 14.962  | 4.13    | 4.57    | 4.89    |
| 1415 | TRUE | Empty | Selenide, water dikinase 2 OS=Homo sapiens GN=SEPHS2 PE=1 SV=3                          | SPS2_HUMAN   | 47 kDa  | TRUE | .483821997  | 0.5         | 0       | 6.259  | 2.24    | 2.57    | 0.84713 | 1.96    |
| 1416 | TRUE | Empty | Selenium-binding protein 1 OS=Homo sapiens GN=SELENBP1 PE=1 SV=2                        | SBP1_HUMAN   | ?       |      | 0.178972218 | 0.3         | 4.06    | 58.418 | 56.855  | 11.178  | 8.13    | 13.157  |
| 1417 | TRUE | Empty | Sentrin-specific protease 3 OS=Homo sapiens GN=SENPP3 PE=1 SV=2                         | SENPP3_HUMAN | 65 kDa  | TRUE | .040274969  | 4.032853448 | 0.99746 | 0      | 0       | 2.57    | 0.84713 | 0.93978 |
| 1418 | TRUE | Empty | Sepiapterin reductase OS=Homo sapiens GN=SPR PE=1 SV=1                                  | SPRE_HUMAN   | 28 kDa  |      | 0.127250026 | 4           | 0       | 1.0432 | 3.98    | 3.61    | 5.0828  | 11.277  |
| 1419 | TRUE | Empty | Septin-11 OS=Homo sapiens GN=SEPT11 PE=1 SV=3                                           | SEP11_HUMAN  | ?       | TRUE | .805278135  | 0.8         | 0       | 5.59   | 2.24    | 2.57    | 0.84713 | 3.91    |
| 1420 | TRUE | Empty | Septin-2 OS=Homo sapiens GN=SEPT2 PE=1 SV=1                                             | SEPT2_HUMAN  | ?       |      | 0.010632285 | 0.437212309 | 11.052  | 13.561 | 10.972  | 5.17    | 6.71    | 2.94    |

|      |      |       |                                                                                                                        |             |         |      |             |             |        |         |         |         |         |         |
|------|------|-------|------------------------------------------------------------------------------------------------------------------------|-------------|---------|------|-------------|-------------|--------|---------|---------|---------|---------|---------|
| 1421 | TRUE | Empty | Septin-7 OS=Homo sapiens GN=SEPT7 PE=1 SV=2                                                                            | SEPT7_HUMAN | ?       | TRUE | .776559456  | 1.2         | 0      | 7.22    | 9.46    | 9.78    | 5.99    | 4.89    |
| 1422 | TRUE | Empty | Septin-8 OS=Homo sapiens GN=SEPT8 PE=1 SV=4                                                                            | SEPT8_HUMAN | ?       | TRUE | .400765353  | 1.8         | 0      | 2.0863  | 2.24    | 4.13    | 0.84713 | 3.91    |
| 1423 | TRUE | Empty | Septin-9 OS=Homo sapiens GN=SEPT9 PE=1 SV=2                                                                            | SEPT9_HUMAN | ?       | TRUE | .177837452  | 2.2         | 0      | 7.22    | 4.73    | 9.78    | 5.0828  | 12.217  |
| 1424 | TRUE | Empty | Sequestosome-1 OS=Homo sapiens GN=SQSTM1 PE=1 SV=1                                                                     | SQSTM_HUMAN | ?       | TRUE | .943452794  | 0.9         | 0      | 2.0863  | 1.49    | 2.09    | 0.84713 | 0       |
| 1425 | TRUE | Empty | Serine beta-lactamase-like protein LACTB, mitochondrial OS=Homo sapiens GN=LACTB PE=1 SV=2                             | LACTB_HUMAN | ?       |      | 0.050597357 | INF         | 0      | 0       | 0       | 2.57    | 6.71    | 2.94    |
| 1426 | TRUE | Empty | Serine dehydratase-like OS=Homo sapiens GN=SDSL PE=1 SV=1                                                              | SDSL_HUMAN  | 35 kDa  | TRUE | .211482915  | 0.2         | 0      | 7.22    | 4.73    | 0.74522 | 1.43    | 0       |
| 1427 | TRUE | Empty | Serine hydroxymethyltransferase, cytosolic OS=Homo sapiens GN=SHMT1 PE=1 SV=1                                          | GLYC_HUMAN  | ?       | TRUE | .001799291  | 3.165816141 | 2.03   | 3.1295  | 0.99746 | 6.707   | 6.71    | 6.85    |
| 1428 | TRUE | Empty | Serine hydroxymethyltransferase, mitochondrial OS=Homo sapiens GN=SHMT2 PE=1 SV=3                                      | GLYM_HUMAN  | ?       | TRUE | .013656834  | 4.391084199 | 4.06   | 2.0863  | 4.73    | 12.669  | 15.248  | 22.555  |
| 1429 | TRUE | Empty | Serine palmitoyltransferase 2 OS=Homo sapiens GN=SPTLC2 PE=1 SV=1                                                      | SPTC2_HUMAN | 63 kDa  | TRUE | .117184678  | INF         | 0      | 0       | 0       | 0       | 1.43    | 1.96    |
| 1430 | TRUE | Empty | Serine protease 23 OS=Homo sapiens GN=PRSS23 PE=1 SV=1                                                                 | PRS23_HUMAN | ?       | TRUE | 0.24820164  | 0.04        | 0      | 4.1727  | 15.959  | 0.74522 | 0       | 0       |
| 1431 | TRUE | Empty | Serine/arginine repetitive matrix protein 1 OS=Homo sapiens GN=SRRM1 PE=1 SV=2                                         | SRRM1_HUMAN | ?       | TRUE | .846250418  | 0.9         | 0      | 5.59    | 8.71    | 4.13    | 3.85    | 4.89    |
| 1432 | TRUE | Empty | Serine/arginine repetitive matrix protein 2 OS=Homo sapiens GN=SRRM2 PE=1 SV=2                                         | SRRM2_HUMAN | ?       | TRUE | .485858436  | 0.7         | 2.03   | 17.734  | 16.957  | 8.74    | 7.42    | 9.78    |
| 1433 | TRUE | Empty | Serine/arginine-rich splicing factor 1 OS=Homo sapiens GN=SRSF1 PE=1 SV=2                                              | SRSF1_HUMAN | ?       | TRUE | .133908648  | 0.6         | 41.996 | 78.238  | 39.898  | 24.592  | 33.038  | 31.013  |
| 1434 | TRUE | Empty | Serine/arginine-rich splicing factor 11 OS=Homo sapiens GN=SRSF11 PE=1 SV=1                                            | SRS11_HUMAN | ?       | TRUE | .555485241  | 0.6         | 0      | 1.0432  | 1.49    | 0       | 0.84713 | 0.93978 |
| 1435 | TRUE | Empty | Serine/arginine-rich splicing factor 3 OS=Homo sapiens GN=SRSF3 PE=1 SV=1                                              | SRSF3_HUMAN | ?       | TRUE | .331126616  | 0.4         | 0      | 28.166  | 40.896  | 11.923  | 10.166  | 6.85    |
| 1436 | TRUE | Empty | Serine/arginine-rich splicing factor 6 OS=Homo sapiens GN=SRSF6 PE=1 SV=2                                              | SRSF6_HUMAN | ?       | TRUE | .684915003  | 1.3         | 0      | 4.1727  | 8.71    | 5.17    | 5.99    | 4.89    |
| 1437 | TRUE | Empty | Serine/arginine-rich splicing factor 7 OS=Homo sapiens GN=SRSF7 PE=1 SV=1                                              | SRSF7_HUMAN | ?       | TRUE | .006240727  | 0.196308743 | 22.103 | 20.863  | 32.916  | 5.17    | 4.57    | 4.89    |
| 1438 | TRUE | Empty | Serine/arginine-rich splicing factor 9 OS=Homo sapiens GN=SRSF9 PE=1 SV=1                                              | SRSF9_HUMAN | 26 kDa  | TRUE | .257173348  | 0.5         | 2.03   | 10.432  | 8.71    | 1.04    | 3.85    | 5.87    |
| 1439 | TRUE | Empty | Serine/threonine-protein kinase 24 OS=Homo sapiens GN=STK24 PE=1 SV=1                                                  | STK24_HUMAN | ?       | TRUE | .067655025  | 4.6         | 0      | 0       | 1.49    | 2.09    | 4.57    | 1.96    |
| 1440 | TRUE | Empty | Serine/threonine-protein kinase MARK2 OS=Homo sapiens GN=MARK2 PE=1 SV=2                                               | MARK2_HUMAN | ?       | TRUE | .373900966  | INF         | 0      | 0       | 0       | 2.57    | 0       | 0       |
| 1441 | TRUE | Empty | Serine/threonine-protein kinase MRCK beta OS=Homo sapiens GN=CDC42BPB PE=1 SV=2                                        | MRCKB_HUMAN | 194 kDa | TRUE | .373900966  | INF         | 0      | 0       | 0       | 2.57    | 0       | 0       |
| 1442 | TRUE | Empty | Serine/threonine-protein kinase mTOR OS=Homo sapiens GN=MTOR PE=1 SV=1                                                 | MTOR_HUMAN  | 289 kDa | TRUE | .000114504  | 5.077196078 | 0      | 0.99746 | 0       | 1.04    | 1.43    | 1.96    |
| 1443 | TRUE | Empty | Serine/threonine-protein kinase OSR1 OS=Homo sapiens GN=OSR1 PE=1 SV=1                                                 | OXSR1_HUMAN | 58 kDa  | TRUE | .111295643  | 3.4         | 2.03   | 0       | 0       | 2.57    | 3.85    | 1.96    |
| 1444 | TRUE | Empty | Serine/threonine-protein kinase PAK 2 OS=Homo sapiens GN=PAK2 PE=1 SV=3                                                | PAK2_HUMAN  | 58 kDa  | TRUE | 0.1240126   | 3.9         | 2.03   | 3.1295  | 0.99746 | 14.159  | 6.71    | 3.91    |
| 1445 | TRUE | Empty | Serine/threonine-protein kinase PRP4 homolog OS=Homo sapiens GN=PRPF4B PE=1 SV=3                                       | PRP4B_HUMAN | 117 kDa | TRUE | 0.06853503  | INF         | 0      | 0       | 0       | 0.74522 | 2.14    | 0.93978 |
| 1446 | TRUE | Empty | Serine/threonine-protein phosphatase 1 regulatory subunit 10 OS=Homo sapiens GN=PPP1R10 PE=1 SV=1                      | PP1RA_HUMAN | 99 kDa  | TRUE | .373900966  | 0           | 0      | 0       | 2.24    | 0       | 0       | 0       |
| 1447 | TRUE | Empty | Serine/threonine-protein phosphatase 2A 55 kDa regulatory subunit B alpha isoform OS=Homo sapiens GN=PPP2R2A PE=1 SV=1 | 2ABA_HUMAN  | ?       | TRUE | .106985915  | 5.2         | 0      | 0       | 0.99746 | 1.04    | 0.84713 | 2.94    |

|      |      |       |                                                                                                                        |                 |        |      |             |             |        |         |         |         |         |         |
|------|------|-------|------------------------------------------------------------------------------------------------------------------------|-----------------|--------|------|-------------|-------------|--------|---------|---------|---------|---------|---------|
| 1448 | TRUE | Empty | Serine/threonine-protein phosphatase 2A 56 kDa regulatory subunit delta isoform OS=Homo sapiens GN=PPP2R5D PE=1 SV=1   | 2A5D_HUMAN      | ?      | TRUE | .116540141  | INF         | 0      | 0       | 0       | 0.74522 | 1.43    | 4.89    |
| 1449 | TRUE | Empty | Serine/threonine-protein phosphatase 2A 65 kDa regulatory subunit A alpha isoform OS=Homo sapiens GN=PPP2R1A PE=1 SV=4 | 2AAA_HUMAN      | 65 kDa | TRUE | .068567243  | 3.3         | 35.365 | 3.1295  | 0.99746 | 33.535  | 46.592  | 49.809  |
| 1450 | TRUE | Empty | Serine/threonine-protein phosphatase 2A activator OS=Homo sapiens GN=PPP2R4 PE=1 SV=3                                  | PTPA_HUMAN      | ?      |      | 0.092355765 | 2.8         | 4.06   | 2.0863  | 0       | 3.61    | 7.42    | 6.85    |
| 1451 | TRUE | Empty | Serine/threonine-protein phosphatase 2A catalytic subunit alpha isoform OS=Homo sapiens GN=PPP2CA PE=1 SV=1            | PP2AA_HUMAN     | ?      | TRUE | 0.56982463  | 0.7         | 2.03   | 19.82   | 14.962  | 8.26    | 12.707  | 4.89    |
| 1452 | TRUE | Empty | Serine/threonine-protein phosphatase 2B catalytic subunit alpha isoform OS=Homo sapiens GN=PPP3CA PE=1 SV=1            | PP2BA_HUMAN     | ?      | TRUE | 0.29541841  | 2.8         | 0      | 0       | 2.24    | 1.04    | 5.0828  | 1.96    |
| 1453 | TRUE | Empty | Serine/threonine-protein phosphatase 5 OS=Homo sapiens GN=PPP5C PE=1 SV=1                                              | PPP5_HUMAN      | 57 kDa | TRUE | .028710087  | 2.846922074 | 0      | 1.0432  | 0.99746 | 2.57    | 1.43    | 1.96    |
| 1454 | TRUE | Empty | Serine/threonine-protein phosphatase 6 catalytic subunit OS=Homo sapiens GN=PPP6C PE=1 SV=1                            | PPP6_HUMAN      | ?      |      | 0.929780221 | 1.1         | 0      | 2.0863  | 5.47    | 2.57    | 1.43    | 4.89    |
| 1455 | TRUE | Empty | Serine/threonine-protein phosphatase 6 regulatory subunit 3 OS=Homo sapiens GN=PPP6R3 PE=1 SV=2                        | PP6R3_HUMAN     | ?      | TRUE | .000678736  | 10.90138953 | 0      | 0.99746 | 0       | 3.61    | 3.85    | 3.91    |
| 1456 | TRUE | Empty | Serine/threonine-protein phosphatase CPPED1 OS=Homo sapiens GN=CPPED1 PE=1 SV=3                                        | CPPED_HUMAN     | ?      |      | 0.954378702 | 1           | 0      | 2.0863  | 1.49    | 1.04    | 0.84713 | 1.96    |
| 1457 | TRUE | Empty | Serine/threonine-protein phosphatase PP1-alpha catalytic subunit OS=Homo sapiens GN=PPP1CA PE=1 SV=1                   | PP1A_HUMAN      | ?      | TRUE | .447182751  | 0.8         | 22.103 | 21.907  | 28.926  | 14.159  | 20.331  | 27.254  |
| 1458 | TRUE | Empty | Serine/threonine-protein phosphatase PP1-beta catalytic subunit OS=Homo sapiens GN=PPP1CB PE=1 SV=3                    | PP1B_HUMAN      | 37 kDa | TRUE | .704986412  | 0.9         | 15.472 | 14.604  | 27.929  | 12.669  | 15.248  | 23.495  |
| 1459 | TRUE | Empty | Serine-threonine kinase receptor-associated protein OS=Homo sapiens GN=STRAP PE=1 SV=1                                 | STRAP_HUMAN     | ?      |      | 0.79694798  | 1.2         | 0      | 4.1727  | 3.98    | 1.04    | 4.57    | 3.91    |
| 1460 | TRUE | Empty | Serine--tRNA ligase, cytoplasmic OS=Homo sapiens GN=SARS PE=1 SV=3                                                     | SYSC_HUMAN      | 59 kDa |      | 0.075797828 | 5.6         | 2.03   | 2.0863  | 1.49    | 19.376  | 10.166  | 5.87    |
| 1461 | TRUE | Empty | Serine--tRNA ligase, mitochondrial OS=Homo sapiens GN=SARS2 PE=1 SV=1                                                  | SYSM_HUMAN      | ?      | TRUE | .373900966  | INF         | 0      | 0       | 0       | 2.57    | 0       | 0       |
| 1462 | TRUE | Empty | Serpin B6 OS=Homo sapiens GN=SERPINB6 PE=1 SV=3                                                                        | SPB6_HUMAN      | 43 kDa |      | 0.018109053 | 5.077196078 | 0      | 0       | 0.99746 | 1.04    | 1.43    | 1.96    |
| 1463 | TRUE | Empty | Serpin H1 OS=Homo sapiens GN=SERPINH1 PE=1 SV=2                                                                        | SERPH_HUMAN     | 46 kDa |      | 0.340897831 | 2.9         | 41.996 | 4.1727  | 0       | 93.898  | 17.79   | 24.434  |
| 1464 | TRUE | Empty | Serrate RNA effector molecule homolog OS=Homo sapiens GN=SRRT PE=1 SV=1                                                | SRRT_HUMAN      | ?      | TRUE | .169759736  | INF         | 0      | 0       | 0       | 0       | 0.84713 | 1.96    |
| 1465 | TRUE | Empty | Serum albumin OS=Homo sapiens GN=ALB PE=1 SV=2                                                                         | ALBU_HUMAN      | ?      |      | 0.156396892 | 0.3         | 148.09 | 37.554  | 226.42  | 34.28   | 19.484  | 63.905  |
| 1466 | TRUE | Empty | SET1B_HUMAN-DECOY                                                                                                      | SET1B_HUMAN-DEC | ?      | TRUE | .862024923  | 0.8         | 2.03   | 0       | 0       | 0       | 1.43    | 0       |
| 1467 | TRUE | Empty | S-formylglutathione hydrolase OS=Homo sapiens GN=ESD PE=1 SV=2                                                         | ESTD_HUMAN      | 31 kDa |      | 0.365410258 | 1.8         | 0      | 4.1727  | 5.47    | 4.13    | 10.166  | 3.91    |
| 1468 | TRUE | Empty | SH3 domain-binding glutamic acid-rich-like protein OS=Homo sapiens GN=SH3BGRL PE=1 SV=1                                | SH3L1_HUMAN     | 13 kDa |      | 0.359997146 | 0.5         | 0      | 25.036  | 19.949  | 3.61    | 7.42    | 9.78    |
| 1469 | TRUE | Empty | SHC-transforming protein 1 OS=Homo sapiens GN=SHC1 PE=1 SV=4                                                           | SHC1_HUMAN      | ?      | TRUE | .198391549  | 0.1         | 0      | 3.1295  | 1.49    | 0.74522 | 0       | 0       |
| 1470 | TRUE | Empty | Shootin-1 OS=Homo sapiens GN=SHTN1 PE=1 SV=4                                                                           | SHOT1_HUMAN     | ?      | TRUE | .675517486  | 1.7         | 0      | 2.0863  | 0       | 0.74522 | 0       | 2.94    |
| 1471 | TRUE | Empty | Short/branched chain specific acyl-CoA dehydrogenase, mitochondrial OS=Homo sapiens GN=ACDSB PE=1 SV=1                 | ACDSB_HUMAN     | ?      |      | 0.036450182 | 6.580694965 | 0      | 0       | 0.99746 | 2.57    | 3.85    | 0.93978 |
| 1472 | TRUE | Empty | Sialate O-acetyltransferase OS=Homo sapiens GN=SIAE PE=1 SV=1                                                          | SIAE_HUMAN      | ?      |      | 0.128620701 | 0           | 0      | 2.0863  | 2.24    | 0       | 0       | 0       |
| 1473 | TRUE | Empty | Sialic acid synthase OS=Homo sapiens GN=NANS PE=1 SV=2                                                                 | SIAS_HUMAN      | 40 kDa |      | 0.434433138 | 1.2         | 8.13   | 14.604  | 17.954  | 20.866  | 15.248  | 14.097  |
| 1474 | TRUE | Empty | Sideroflexin-1 OS=Homo sapiens GN=SFXN1 PE=1 SV=4                                                                      | SFXN1_HUMAN     | 36 kDa | TRUE | .003860013  | 4.173344125 | 4.06   | 0       | 2.24    | 10.433  | 10.166  | 10.338  |

|      |      |       |                                                                                                          |             |        |      |             |             |        |         |         |        |         |         |
|------|------|-------|----------------------------------------------------------------------------------------------------------|-------------|--------|------|-------------|-------------|--------|---------|---------|--------|---------|---------|
| 1475 | TRUE | Empty | Signal peptidase complex catalytic subunit SEC11A OS=Homo sapiens GN=SEC11A PE=1 SV=1                    | SC11A_HUMAN | ?      | TRUE | .935581317  | 0.9         | 6.631  | 0       | 0       | 2.57   | 0       | 3.91    |
| 1476 | TRUE | Empty | Signal recognition particle 14 kDa protein OS=Homo sapiens GN=SRP14 PE=1 SV=2                            | SRP14_HUMAN | 15 kDa |      | 0.482338413 | 1.4         | 2.03   | 7.22    | 7.97    | 3.61   | 11.013  | 9.78    |
| 1477 | TRUE | Empty | Signal recognition particle 19 kDa protein OS=Homo sapiens GN=SRP19 PE=1 SV=3                            | SRP19_HUMAN | ?      |      | 0.412765041 | 1.9         | 0      | 1.0432  | 4.73    | 1.04   | 4.57    | 5.87    |
| 1478 | TRUE | Empty | Signal recognition particle 54 kDa protein OS=Homo sapiens GN=SRP54 PE=1 SV=1                            | SRP54_HUMAN | ?      |      | 0.117184738 | INF         | 0      | 0       | 0       | 0      | 3.85    | 3.91    |
| 1479 | TRUE | Empty | Signal recognition particle 9 kDa protein OS=Homo sapiens GN=SRP9 PE=1 SV=2                              | SRP09_HUMAN | ?      |      | 0.287079299 | 0.3         | 0      | 17.734  | 9.46    | 1.04   | 3.85    | 3.91    |
| 1480 | TRUE | Empty | Signal recognition particle receptor subunit beta OS=Homo sapiens GN=SRPRB PE=1 SV=3                     | SRPRB_HUMAN | 30 kDa |      | 0.447938824 | 1.9         | 2.03   | 0       | 0       | 1.04   | 0.84713 | 1.96    |
| 1481 | TRUE | Empty | Signal recognition particle subunit SRP68 OS=Homo sapiens GN=SRP68 PE=1 SV=2                             | SRP68_HUMAN | ?      | TRUE | .084566581  | INF         | 0      | 0       | 0       | 2.09   | 0.84713 | 0.93978 |
| 1482 | TRUE | Empty | Signal recognition particle subunit SRP72 OS=Homo sapiens GN=SRP72 PE=1 SV=3                             | SRP72_HUMAN | ?      | TRUE | .008125151  | 20.59651515 | 0      | 0       | 0.99746 | 5.65   | 5.99    | 9.78    |
| 1483 | TRUE | Empty | Signal transducer and activator of transcription 1-alpha/beta OS=Homo sapiens GN=STAT1 PE=1 SV=2         | STAT1_HUMAN | ?      |      | 0.017884039 | 5.360126678 | 6.631  | 0       | 0       | 10.433 | 11.013  | 14.097  |
| 1484 | TRUE | Empty | Signal transducer and activator of transcription 3 OS=Homo sapiens GN=STAT3 PE=1 SV=2                    | STAT3_HUMAN | ?      |      | 0.06534674  | 4.8         | 2.03   | 0       | 0       | 4.13   | 4.57    | 1.96    |
| 1485 | TRUE | Empty | Single-stranded DNA-binding protein, mitochondrial OS=Homo sapiens GN=SSBP1 PE=1 SV=1                    | SSBP_HUMAN  | 17 kDa |      | 0.136394625 | 2.4         | 0      | 3.1295  | 2.24    | 6.707  | 5.0828  | 2.94    |
| 1486 | TRUE | Empty | Small glutamine-rich tetratricopeptide repeat-containing protein alpha OS=Homo sapiens GN=SGTA PE=1 SV=1 | SGTA_HUMAN  | 34 kDa |      | 0.334828316 | 0.4         | 0      | 12.518  | 6.22    | 2.57   | 3.85    | 1.96    |
| 1487 | TRUE | Empty | Small nuclear ribonucleoprotein E OS=Homo sapiens GN=SNRPE PE=1 SV=1                                     | RUXE_HUMAN  | 11 kDa |      | 0.41336916  | 0.5         | 30.944 | 1.0432  | 13.964  | 3.61   | 7.42    | 10.338  |
| 1488 | TRUE | Empty | Small nuclear ribonucleoprotein F OS=Homo sapiens GN=SNRPF PE=1 SV=1                                     | RUXF_HUMAN  | 10 kDa |      | 0.277803163 | 0.6         | 2.03   | 6.259   | 7.97    | 3.61   | 3.85    | 2.94    |
| 1489 | TRUE | Empty | Small nuclear ribonucleoprotein Sm D1 OS=Homo sapiens GN=SNRPD1 PE=1 SV=1                                | SMD1_HUMAN  | 13 kDa |      | 0.262058897 | 0.6         | 4.06   | 7.22    | 4.73    | 4.13   | 5.0828  | 0       |
| 1490 | TRUE | Empty | Small nuclear ribonucleoprotein Sm D2 OS=Homo sapiens GN=SNRPD2 PE=1 SV=1                                | SMD2_HUMAN  | ?      |      | 0.021425574 | 2.545556805 | 4.06   | 1.0432  | 6.22    | 11.178 | 10.166  | 10.338  |
| 1491 | TRUE | Empty | Small nuclear ribonucleoprotein Sm D3 OS=Homo sapiens GN=SNRPD3 PE=1 SV=1                                | SMD3_HUMAN  | ?      | TRUE | .183979726  | 0.6         | 26.524 | 11.475  | 13.964  | 7.22   | 10.166  | 11.277  |
| 1492 | TRUE | Empty | Small nuclear ribonucleoprotein-associated protein N OS=Homo sapiens GN=SNRPN PE=1 SV=1                  | RSMN_HUMAN  | ?      | TRUE | .625608496  | 0.8         | 6.631  | 18.777  | 11.969  | 8.26   | 9.85    | 13.157  |
| 1493 | TRUE | Empty | SMC5-SMC6 complex localization factor protein 1 OS=Homo sapiens GN=SLF1 PE=1 SV=2                        | SLF1_HUMAN  | ?      | TRUE | .373900966  | INF         | 0      | 0       | 0       | 0      | 1.43    | 0       |
| 1494 | TRUE | Empty | SNARE-associated protein Snapin OS=Homo sapiens GN=SNAPIN PE=1 SV=1                                      | SNAPN_HUMAN | 15 kDa |      | 0.064564664 | 2.5         | 0      | 1.0432  | 1.49    | 2.57   | 2.14    | 2.94    |
| 1495 | TRUE | Empty | Sodium/hydrogen exchanger 2 OS=Homo sapiens GN=SLC9A2 PE=2 SV=1                                          | SL9A2_HUMAN | 92 kDa | TRUE | .373900966  | 0           | 0      | 2.0863  | 0       | 0      | 0       | 0       |
| 1496 | TRUE | Empty | Sodium/potassium-transporting ATPase subunit alpha-1 OS=Homo sapiens GN=ATP1A1 PE=1 SV=1                 | AT1A1_HUMAN | ?      | TRUE | .015973542  | 12.22558891 | 4.06   | 1.0432  | 1.49    | 42.477 | 18.637  | 30.073  |
| 1497 | TRUE | Empty | Sodium/potassium-transporting ATPase subunit beta-1 OS=Homo sapiens GN=ATP1B1 PE=1 SV=1                  | AT1B1_HUMAN | ?      | TRUE | .006625109  | 10.24722796 | 0      | 0.99746 | 0       | 2.09   | 2.14    | 4.89    |
| 1498 | TRUE | Empty | Solute carrier family 12 member 2 OS=Homo sapiens GN=SLC12A2 PE=1 SV=1                                   | S12A2_HUMAN | ?      | TRUE | .036450182  | 6.580694965 | 0      | 0.99746 | 0       | 2.57   | 3.85    | 0.93978 |
| 1499 | TRUE | Empty | Solute carrier family 35 member E1 OS=Homo sapiens GN=SLC35E1 PE=1 SV=2                                  | S35E1_HUMAN | ?      |      | 0.373900966 | INF         | 0      | 0       | 0       | 0      | 1.43    | 0       |
| 1500 | TRUE | Empty | Sorbitol dehydrogenase OS=Homo sapiens GN=SORD PE=1 SV=4                                                 | DHSO_HUMAN  | ?      |      | 0.9752922   | 1           | 2.03   | 2.0863  | 4.73    | 2.09   | 3.85    | 2.94    |
| 1501 | TRUE | Empty | Sorcin OS=Homo sapiens GN=SRI PE=1 SV=1                                                                  | SORCN_HUMAN | ?      |      | 0.575795448 | 0.7         | 4.06   | 30.252  | 10.972  | 5.17   | 5.99    | 17.856  |

|      |      |       |                                                                                            |             |         |      |             |             |        |         |         |         |         |         |
|------|------|-------|--------------------------------------------------------------------------------------------|-------------|---------|------|-------------|-------------|--------|---------|---------|---------|---------|---------|
| 1502 | TRUE | Empty | Sorting nexin-1 OS=Homo sapiens GN=SNX1 PE=1 SV=3                                          | SNX1_HUMAN  | ?       | TRUE | .118047874  | INF         | 0      | 0       | 0       | 5.65    | 1.43    | 0.93978 |
| 1503 | TRUE | Empty | Sorting nexin-2 OS=Homo sapiens GN=SNX2 PE=1 SV=2                                          | SNX2_HUMAN  | ?       | TRUE | .018397496  | 14.17781164 | 0      | 0       | 0.99746 | 5.17    | 2.14    | 5.87    |
| 1504 | TRUE | Empty | Sorting nexin-3 OS=Homo sapiens GN=SNX3 PE=1 SV=3                                          | SNX3_HUMAN  | ?       | TRUE | .866351863  | 1.2         | 0      | 0       | 1.49    | 0.74522 | 1.43    | 0       |
| 1505 | TRUE | Empty | Sorting nexin-5 OS=Homo sapiens GN=SNX5 PE=1 SV=1                                          | SNX5_HUMAN  | ?       | TRUE | .092878935  | 5.5         | 0      | 1.0432  | 0       | 2.09    | 0.84713 | 1.96    |
| 1506 | TRUE | Empty | Sorting nexin-6 OS=Homo sapiens GN=SNX6 PE=1 SV=1                                          | SNX6_HUMAN  | ?       | TRUE | .155248768  | INF         | 0      | 0       | 0       | 4.13    | 0.84713 | 0.93978 |
| 1507 | TRUE | Empty | Spectrin alpha chain, erythrocytic 1 OS=Homo sapiens GN=SPTA1 PE=1 SV=5                    | SPTA1_HUMAN | ?       | TRUE | .373900966  | 0           | 0      | 0       | 6.22    | 0       | 0       | 0       |
| 1508 | TRUE | Empty | Spectrin alpha chain, non-erythrocytic 1 OS=Homo sapiens GN=SPTAN1 PE=1 SV=3               | SPTN1_HUMAN | ?       | TRUE | .471977501  | 0.7         | 11.052 | 64.677  | 72.814  | 32.79   | 33.885  | 35.712  |
| 1509 | TRUE | Empty | Spectrin beta chain, erythrocytic OS=Homo sapiens GN=SPTB PE=1 SV=5                        | SPTB1_HUMAN | ?       | TRUE | .587433298  | 0.4         | 0      | 0       | 3.98    | 0.74522 | 0.84713 | 0       |
| 1510 | TRUE | Empty | Spectrin beta chain, non-erythrocytic 1 OS=Homo sapiens GN=SPTBN1 PE=1 SV=2                | SPTB2_HUMAN | ?       | TRUE | .066532934  | 3.1         | 0      | 3.1295  | 7.97    | 14.904  | 7.42    | 12.217  |
| 1511 | TRUE | Empty | Spectrin beta chain, non-erythrocytic 2 OS=Homo sapiens GN=SPTBN2 PE=1 SV=3                | SPTN2_HUMAN | ?       | TRUE | .001524133  | 7.420748702 | 0      | 0.99746 | 0       | 2.09    | 2.14    | 1.96    |
| 1512 | TRUE | Empty | Spermatid perinuclear RNA-binding protein OS=Homo sapiens GN=STRBP PE=1 SV=1               | STRBP_HUMAN | ?       | TRUE | .384338753  | 1.4         | 2.03   | 3.1295  | 1.49    | 3.61    | 1.43    | 4.89    |
| 1513 | TRUE | Empty | Spermatogenesis-defective protein 39 homolog OS=Homo sapiens GN=VIPAS39 PE=1 SV=1          | SPE39_HUMAN | ?       |      | 0.373900966 | INF         | 0      | 0       | 0       | 2.09    | 0       | 0       |
| 1514 | TRUE | Empty | Spermidine synthase OS=Homo sapiens GN=SRM PE=1 SV=1                                       | SPEE_HUMAN  | 34 kDa  |      | 0.022694969 | 6.069357101 | 2.03   | 0       | 0       | 3.61    | 5.99    | 3.91    |
| 1515 | TRUE | Empty | S-phase kinase-associated protein 1 OS=Homo sapiens GN=SKP1 PE=1 SV=2                      | SKP1_HUMAN  | ?       | TRUE | .215983346  | 2.7         | 0      | 3.1295  | 0       | 2.09    | 1.43    | 3.91    |
| 1516 | TRUE | Empty | Sphingosine-1-phosphate lyase 1 OS=Homo sapiens GN=SGPL1 PE=1 SV=3                         | SGPL1_HUMAN | 64 kDa  |      | 0.822789008 | 1.2         | 6.631  | 0       | 0       | 2.09    | 3.85    | 1.96    |
| 1517 | TRUE | Empty | Spliceosome RNA helicase DDX39B OS=Homo sapiens GN=DDX39B PE=1 SV=1                        | DX39B_HUMAN | ?       | TRUE | .018571105  | 1.771415362 | 19.893 | 13.561  | 11.969  | 24.592  | 30.497  | 25.374  |
| 1518 | TRUE | Empty | Splicing factor 1 OS=Homo sapiens GN=SF1 PE=1 SV=4                                         | SF01_HUMAN  | ?       | TRUE | .844297138  | 0.9         | 4.06   | 13.561  | 11.969  | 7.22    | 9.85    | 11.277  |
| 1519 | TRUE | Empty | Splicing factor 3A subunit 1 OS=Homo sapiens GN=SF3A1 PE=1 SV=1                            | SF3A1_HUMAN | ?       | TRUE | .732683096  | 1.1         | 2.03   | 11.475  | 10.972  | 10.433  | 10.166  | 7.83    |
| 1520 | TRUE | Empty | Splicing factor 3A subunit 3 OS=Homo sapiens GN=SF3A3 PE=1 SV=1                            | SF3A3_HUMAN | 59 kDa  |      | 0.01159133  | 5.148480958 | 0      | 1.0432  | 1.49    | 6.707   | 4.57    | 4.89    |
| 1521 | TRUE | Empty | Splicing factor 3B subunit 1 OS=Homo sapiens GN=SF3B1 PE=1 SV=3                            | SF3B1_HUMAN | ?       | TRUE | .012864893  | 8.909612939 | 2.03   | 0       | 0.99746 | 10.433  | 5.99    | 12.217  |
| 1522 | TRUE | Empty | Splicing factor 3B subunit 2 OS=Homo sapiens GN=SF3B2 PE=1 SV=2                            | SF3B2_HUMAN | 100 kDa |      | 0.211640432 | 0.8         | 11.052 | 15.648  | 15.959  | 7.22    | 12.707  | 12.217  |
| 1523 | TRUE | Empty | Splicing factor 3B subunit 3 OS=Homo sapiens GN=SF3B3 PE=1 SV=4                            | SF3B3_HUMAN | ?       | TRUE | .285563888  | 1.7         | 26.524 | 6.259   | 8.71    | 15.65   | 23.72   | 31.013  |
| 1524 | TRUE | Empty | Splicing factor 3B subunit 4 OS=Homo sapiens GN=SF3B4 PE=1 SV=1                            | SF3B4_HUMAN | 44 kDa  |      | 0.239842021 | 0.6         | 6.631  | 9.86    | 10.972  | 2.09    | 10.166  | 1.96    |
| 1525 | TRUE | Empty | Splicing factor 3B subunit 5 OS=Homo sapiens GN=SF3B5 PE=1 SV=1                            | SF3B5_HUMAN | 10 kDa  |      | 0.974219573 | 1           | 0      | 3.1295  | 0       | 2.09    | 0       | 0       |
| 1526 | TRUE | Empty | Splicing factor 3B subunit 6 OS=Homo sapiens GN=SF3B6 PE=1 SV=1                            | SF3B6_HUMAN | 15 kDa  |      | 0.503679695 | 2.2         | 0      | 0       | 1.49    | 1.04    | 0       | 2.94    |
| 1527 | TRUE | Empty | Splicing factor U2AF 35 kDa subunit OS=Homo sapiens GN=U2AF1 PE=1 SV=3                     | U2AF1_HUMAN | ?       | TRUE | .227372921  | 0.3         | 0      | 5.59    | 4.73    | 0       | 1.43    | 0.93978 |
| 1528 | TRUE | Empty | Splicing factor U2AF 65 kDa subunit OS=Homo sapiens GN=U2AF2 PE=1 SV=4                     | U2AF2_HUMAN | ?       |      | 0.444435751 | 0.7         | 6.631  | 21.907  | 22.942  | 11.178  | 10.166  | 15.976  |
| 1529 | TRUE | Empty | Splicing factor, proline- and glutamine-rich OS=Homo sapiens GN=SFPQ PE=1 SV=2             | SFPQ_HUMAN  | ?       | TRUE | .112783319  | 0.5         | 11.052 | 27.122  | 30.921  | 9.78    | 11.86   | 10.338  |
| 1530 | TRUE | Empty | Squamous cell carcinoma antigen recognized by T-cells 3 OS=Homo sapiens GN=SART3 PE=1 SV=1 | SART3_HUMAN | ?       | TRUE | .074940238  | 4.2         | 0      | 0       | 0.99746 | 1.04    | 0.84713 | 1.96    |

|      |      |       |                                                                                                                                    |             |         |      |             |             |         |         |         |         |         |         |
|------|------|-------|------------------------------------------------------------------------------------------------------------------------------------|-------------|---------|------|-------------|-------------|---------|---------|---------|---------|---------|---------|
| 1531 | TRUE | Empty | SRA stem-loop-interacting RNA-binding protein, mitochondrial OS=Homo sapiens GN=SLIRP PE=1 SV=1                                    | SLIRP_HUMAN | ?       | TRUE | .056361213  | 1.8         | 2.03    | 1.0432  | 1.49    | 2.09    | 2.14    | 3.91    |
| 1532 | TRUE | Empty | Src substrate cactactin OS=Homo sapiens GN=CTTN PE=1 SV=2                                                                          | SRC8_HUMAN  | ?       | TRUE | .887759393  | 1.1         | 6.631   | 28.166  | 43.888  | 52.911  | 15.248  | 17.856  |
| 1533 | TRUE | Empty | Staphylococcal nuclease domain-containing protein 1 OS=Homo sapiens GN=SND1 PE=1 SV=1                                              | SND1_HUMAN  | 102 kDa |      | 0.004245828 | 17.81681266 | 2.03    | 1.0432  | 0       | 15.65   | 16.943  | 25.374  |
| 1534 | TRUE | Empty | Stathmin OS=Homo sapiens GN=STMN1 PE=1 SV=3                                                                                        | STMN1_HUMAN | ?       | TRUE | 0.17222739  | 0.4         | 4.06    | 23.993  | 19.949  | 4.13    | 3.85    | 9.78    |
| 1535 | TRUE | Empty | STE20/SPS1-related proline-alanine-rich protein kinase OS=Homo sapiens GN=STK39 PE=1 SV=3                                          | STK39_HUMAN | ?       | TRUE | .010897438  | 12.04800192 | 0.99746 | 0       | 0       | 2.57    | 5.0828  | 4.89    |
| 1536 | TRUE | Empty | Stomatin-like protein 2, mitochondrial OS=Homo sapiens GN=STOML2 PE=1 SV=1                                                         | STML2_HUMAN | ?       |      | 0.014996461 | 12.14093798 | 0       | 0.99746 | 0       | 2.57    | 4.57    | 5.87    |
| 1537 | TRUE | Empty | Stress-70 protein, mitochondrial OS=Homo sapiens GN=HSPA9 PE=1 SV=2                                                                | GRP75_HUMAN | 74 kDa  | TRUE | .747671868  | 0.9         | 110.52  | 87.626  | 50.87   | 66.324  | 82.172  | 81.761  |
| 1538 | TRUE | Empty | Stress-induced-phosphoprotein 1 OS=Homo sapiens GN=STIP1 PE=1 SV=1                                                                 | STIP1_HUMAN | ?       |      | 0.102834031 | 0.7         | 37.575  | 54.245  | 48.875  | 35.025  | 39.815  | 30.073  |
| 1539 | TRUE | Empty | Striatin OS=Homo sapiens GN=STRN PE=1 SV=4                                                                                         | STRN_HUMAN  | ?       | TRUE | .318527546  | 0.3         | 0       | 1.0432  | 1.49    | 0       | 0.84713 | 0       |
| 1540 | TRUE | Empty | Striatin-4 OS=Homo sapiens GN=STRN4 PE=1 SV=2                                                                                      | STRN4_HUMAN | ?       | TRUE | .544033882  | 0.4         | 0       | 1.0432  | 3.98    | 2.57    | 0       | 0       |
| 1541 | TRUE | Empty | Structural maintenance of chromosomes protein 1A OS=Homo sapiens GN=SMC1A PE=1 SV=2                                                | SMC1A_HUMAN | 143 kDa |      | 0.610797588 | 1.9         | 0       | 0       | 1.49    | 2.09    | 0.84713 | 0       |
| 1542 | TRUE | Empty | Succinate dehydrogenase [ubiquinone] flavoprotein subunit, mitochondrial OS=Homo sapiens GN=SDHA PE=1 SV=2                         | SDHA_HUMAN  | ?       |      | 0.21589594  | 1.9         | 8.13    | 2.0863  | 0.99746 | 8.26    | 7.42    | 6.85    |
| 1543 | TRUE | Empty | Succinate-semialdehyde dehydrogenase, mitochondrial OS=Homo sapiens GN=ALDH5A1 PE=1 SV=2                                           | SSDH_HUMAN  | ?       |      | 0.035403751 | 7.37068635  | 0       | 1.0432  | 0       | 2.57    | 1.43    | 3.91    |
| 1544 | TRUE | Empty | Succinyl-CoA ligase [ADP/GDP-forming] subunit alpha, mitochondrial OS=Homo sapiens GN=SUCLG1 PE=1 SV=4                             | SUCA_HUMAN  | 36 kDa  |      | 0.295651198 | 1.8         | 0       | 1.0432  | 2.24    | 2.09    | 2.14    | 1.96    |
| 1545 | TRUE | Empty | Succinyl-CoA ligase [GDP-forming] subunit beta, mitochondrial OS=Homo sapiens GN=SUCLG2 PE=1 SV=2                                  | SUCB2_HUMAN | ?       |      | 0.184058619 | 4           | 2.03    | 0       | 0       | 0.74522 | 3.85    | 4.89    |
| 1546 | TRUE | Empty | Sulfatase-modifying factor 2 OS=Homo sapiens GN=SUMF2 PE=1 SV=2                                                                    | SUMF2_HUMAN | ?       | TRUE | .373900966  | INF         | 0       | 0       | 0       | 1.04    | 0       | 0       |
| 1547 | TRUE | Empty | SUMO-activating enzyme subunit 1 OS=Homo sapiens GN=SAE1 PE=1 SV=1                                                                 | SAE1_HUMAN  | ?       | TRUE | .061814651  | 4.9         | 0       | 0       | 0.99746 | 2.57    | 1.43    | 0.93978 |
| 1548 | TRUE | Empty | SUMO-activating enzyme subunit 2 OS=Homo sapiens GN=UBA2 PE=1 SV=2                                                                 | SAE2_HUMAN  | ?       | TRUE | .047982325  | 2.596305764 | 2.03    | 0       | 2.24    | 3.61    | 5.0828  | 4.89    |
| 1549 | TRUE | Empty | SUMO-conjugating enzyme UBC9 OS=Homo sapiens GN=UBE2I PE=1 SV=1                                                                    | UBC9_HUMAN  | 18 kDa  |      | 0.802212827 | 1.1         | 2.03    | 6.259   | 3.98    | 4.13    | 4.57    | 4.89    |
| 1550 | TRUE | Empty | Superkiller viralicidic activity 2-like 2 OS=Homo sapiens GN=SKIV2L2 PE=1 SV=3                                                     | SK2L2_HUMAN | 118 kDa | TRUE | .040274969  | 4.032853448 | 0       | 0.99746 | 0       | 2.57    | 0.84713 | 0.93978 |
| 1551 | TRUE | Empty | Superoxide dismutase [Cu-Zn] OS=Homo sapiens GN=SOD1 PE=1 SV=2                                                                     | SODC_HUMAN  | 16 kDa  |      | 0.06598773  | 0.4         | 13.262  | 18.777  | 8.71    | 8.74    | 3.85    | 5.87    |
| 1552 | TRUE | Empty | Surfeit locus protein 4 OS=Homo sapiens GN=SURF4 PE=1 SV=3                                                                         | SURF4_HUMAN | ?       | TRUE | .114689101  | 4.2         | 8.13    | 0       | 0       | 8.74    | 9.85    | 19.735  |
| 1553 | TRUE | Empty | Survival motor neuron protein OS=Homo sapiens GN=SMN1 PE=1 SV=1                                                                    | SMN_HUMAN   | ?       |      | 0.44897503  | 0.4         | 0       | 6.259   | 1.49    | 2.09    | 0       | 0       |
| 1554 | TRUE | Empty | SWI/SNF complex subunit SMARCC2 OS=Homo sapiens GN=SMARCC2 PE=1 SV=1                                                               | SMRC2_HUMAN | ?       | TRUE | 0.37532752  | 3.2         | 0       | 0       | 0.99746 | 2.57    | 0       | 0.93978 |
| 1555 | TRUE | Empty | SWI/SNF-related matrix-associated actin-dependent regulator of chromatin subfamily A member 5 OS=Homo sapiens GN=SMARCA5 PE=1 SV=1 | SMCA5_HUMAN | 122 kDa | TRUE | .077979801  | INF         | 0       | 0       | 0       | 8.74    | 3.85    | 1.96    |
| 1556 | TRUE | Empty | Symplekin OS=Homo sapiens GN=SYMPK PE=1 SV=2                                                                                       | SYMPK_HUMAN | ?       | TRUE | .189953018  | INF         | 0       | 0       | 0       | 2.57    | 0.84713 | 0       |
| 1557 | TRUE | Empty | Synapse-associated protein 1 OS=Homo sapiens GN=SYAP1 PE=1 SV=1                                                                    | SYAP1_HUMAN | 40 kDa  |      | 0.369663378 | 1.7         | 0       | 3.1295  | 4.73    | 2.57    | 5.99    | 5.87    |

|      |      |       |                                                                                              |             |         |             |             |             |         |         |         |         |         |         |
|------|------|-------|----------------------------------------------------------------------------------------------|-------------|---------|-------------|-------------|-------------|---------|---------|---------|---------|---------|---------|
| 1558 | TRUE | Empty | Synaptic vesicle membrane protein VAT-1 homolog OS=Homo sapiens GN=VAT1 PE=1 SV=2            | VAT1_HUMAN  | ?       | 0.03651796  | 3.680294278 | 0           | 3.1295  | 1.49    | 4.13    | 5.99    | 8.81    |         |
| 1559 | TRUE | Empty | Synaptosomal-associated protein 29 OS=Homo sapiens GN=SNAP29 PE=1 SV=1                       | SNP29_HUMAN | 29 kDa  | 0.948205042 | 1           | 0           | 6.259   | 3.98    | 3.61    | 4.57    | 1.96    |         |
| 1560 | TRUE | Empty | Syntaxin-12 OS=Homo sapiens GN=STX12 PE=1 SV=1                                               | STX12_HUMAN | 32 kDa  | 0.373900966 | INF         | 0           | 0       | 0       | 1.04    | 0       | 0       |         |
| 1561 | TRUE | Empty | Syntaxin-16 OS=Homo sapiens GN=STX16 PE=1 SV=3                                               | STX16_HUMAN | ?       | 0.043064785 | 5.272311672 | 0.99746     | 0       | 0       | 0.74522 | 1.43    | 2.94    |         |
| 1562 | TRUE | Empty | Syntaxin-17 OS=Homo sapiens GN=STX17 PE=1 SV=2                                               | STX17_HUMAN | 33 kDa  | TRUE        | .028213971  | 5.91725984  | 0.99746 | 0       | 0       | 2.57    | 0.84713 | 2.94    |
| 1563 | TRUE | Empty | Syntaxin-binding protein 3 OS=Homo sapiens GN=STXBP3 PE=1 SV=2                               | STXB3_HUMAN | 68 kDa  | 0.0398156   | 11.35133238 | 0           | 0       | 0.99746 | 5.17    | 2.14    | 2.94    |         |
| 1564 | TRUE | Empty | Syntenin-1 OS=Homo sapiens GN=SDCBP PE=1 SV=1                                                | SDCB1_HUMAN | ?       | 0.068305638 | 4           | 0           | 1.0432  | 0       | 1.04    | 1.43    | 0.93978 |         |
| 1565 | TRUE | Empty | Talin-1 OS=Homo sapiens GN=TLN1 PE=1 SV=3                                                    | TLN1_HUMAN  | 270 kDa | TRUE        | .050972045  | 3           | 4.06    | 3.1295  | 15.959  | 20.866  | 18.637  | 31.953  |
| 1566 | TRUE | Empty | Taperin OS=Homo sapiens GN=TPRN PE=1 SV=2                                                    | TPRN_HUMAN  | ?       | TRUE        | 0.15359     | 0           | 0       | 1.0432  | 1.49    | 0       | 0       | 0       |
| 1567 | TRUE | Empty | TAR DNA-binding protein 43 OS=Homo sapiens GN=TARDBP PE=1 SV=1                               | TADBP_HUMAN | ?       | 0.096356337 | 1.7         | 6.631       | 7.22    | 2.24    | 8.74    | 11.86   | 8.81    |         |
| 1568 | TRUE | Empty | Tax1-binding protein 3 OS=Homo sapiens GN=TAX1BP3 PE=1 SV=2                                  | TX1B3_HUMAN | 14 kDa  | 0.319927212 | 0.4         | 0           | 4.1727  | 3.98    | 1.04    | 1.43    | 0       |         |
| 1569 | TRUE | Empty | T-complex protein 1 subunit alpha OS=Homo sapiens GN=TCP1 PE=1 SV=1                          | TCPA_HUMAN  | 60 kDa  | TRUE        | .017626406  | 2.307611931 | 6.631   | 4.1727  | 4.73    | 14.904  | 9.85    | 12.217  |
| 1570 | TRUE | Empty | T-complex protein 1 subunit beta OS=Homo sapiens GN=CCT2 PE=1 SV=4                           | TCPB_HUMAN  | ?       | TRUE        | 0.13827394  | 1.6         | 48.627  | 16.691  | 23.939  | 47.694  | 45.745  | 49.809  |
| 1571 | TRUE | Empty | T-complex protein 1 subunit delta OS=Homo sapiens GN=CCT4 PE=1 SV=4                          | TCPD_HUMAN  | ?       | 0.073112599 | 2.1         | 19.893      | 8.54    | 7.97    | 27.573  | 17.79   | 29.133  |         |
| 1572 | TRUE | Empty | T-complex protein 1 subunit epsilon OS=Homo sapiens GN=CCT5 PE=1 SV=1                        | TCPE_HUMAN  | ?       | 0.489256994 | 1.2         | 30.944      | 14.604  | 20.947  | 23.102  | 24.567  | 31.013  |         |
| 1573 | TRUE | Empty | T-complex protein 1 subunit eta OS=Homo sapiens GN=CCT7 PE=1 SV=2                            | TCPH_HUMAN  | ?       | 0.068476522 | 2.7         | 8.13        | 0       | 7.97    | 11.178  | 14.401  | 20.675  |         |
| 1574 | TRUE | Empty | T-complex protein 1 subunit gamma OS=Homo sapiens GN=CCT3 PE=1 SV=4                          | TCPG_HUMAN  | ?       | TRUE        | .918010276  | 0.9         | 64.099  | 10.432  | 7.97    | 28.318  | 23.72   | 24.434  |
| 1575 | TRUE | Empty | T-complex protein 1 subunit theta OS=Homo sapiens GN=CCT8 PE=1 SV=4                          | TCPO_HUMAN  | ?       | 0.059221701 | 2.3         | 17.683      | 10.432  | 6.22    | 20.121  | 23.72   | 35.712  |         |
| 1576 | TRUE | Empty | T-complex protein 1 subunit zeta OS=Homo sapiens GN=CCT6A PE=1 SV=3                          | TCPZ_HUMAN  | ?       | TRUE        | .347861381  | 1.5         | 17.683  | 10.432  | 16.957  | 33.535  | 22.025  | 11.277  |
| 1577 | TRUE | Empty | Telomeric repeat-binding factor 2-interacting protein 1 OS=Homo sapiens GN=TERF2IP PE=1 SV=1 | TE2IP_HUMAN | 44 kDa  | 0.181120449 | 0.2         | 0           | 3.1295  | 2.24    | 0       | 0       | 0.93978 |         |
| 1578 | TRUE | Empty | Testin OS=Homo sapiens GN=TES PE=1 SV=1                                                      | TES_HUMAN   | ?       | 0.518941455 | 1.4         | 0           | 9.86    | 4.73    | 5.65    | 7.42    | 7.83    |         |
| 1579 | TRUE | Empty | Testis-expressed sequence 10 protein OS=Homo sapiens GN=TEX10 PE=1 SV=2                      | TEX10_HUMAN | ?       | TRUE        | 0.06853503  | INF         | 0       | 0       | 0       | 0.74522 | 2.14    | 0.93978 |
| 1580 | TRUE | Empty | Tether containing UBX domain for GLUT4 OS=Homo sapiens GN=ASPSR1 PE=1 SV=1                   | ASPC1_HUMAN | ?       | 0.668228187 | 0.6         | 0           | 2.0863  | 0.99746 | 0       | 0       | 1.96    |         |
| 1581 | TRUE | Empty | Tetratricopeptide repeat protein 1 OS=Homo sapiens GN=TTC1 PE=1 SV=1                         | TTC1_HUMAN  | 34 kDa  | 0.377741859 | 0.4         | 0           | 8.54    | 4.73    | 0       | 4.57    | 0.93978 |         |
| 1582 | TRUE | Empty | Tetratricopeptide repeat protein 37 OS=Homo sapiens GN=TTC37 PE=1 SV=1                       | TTC37_HUMAN | 175 kDa | TRUE        | .184606477  | INF         | 0       | 0       | 0       | 0.74522 | 0       | 1.96    |
| 1583 | TRUE | Empty | Thioredoxin domain-containing protein 12 OS=Homo sapiens GN=TXNDC12 PE=1 SV=1                | TXD12_HUMAN | 19 kDa  | 0.388505473 | 3.5         | 0           | 1.0432  | 0       | 0       | 0.84713 | 2.94    |         |
| 1584 | TRUE | Empty | Thioredoxin domain-containing protein 17 OS=Homo sapiens GN=TXNDC17 PE=1 SV=1                | TXD17_HUMAN | 14 kDa  | 0.605837867 | 1.4         | 0           | 7.22    | 10.972  | 3.61    | 8.13    | 13.157  |         |
| 1585 | TRUE | Empty | Thioredoxin domain-containing protein 5 OS=Homo sapiens GN=TXNDC5 PE=1 SV=2                  | TXND5_HUMAN | ?       | 0.075412414 | 2.4         | 0           | 4.1727  | 8.71    | 10.433  | 11.013  | 10.338  |         |
| 1586 | TRUE | Empty | Thioredoxin OS=Homo sapiens GN=TXN PE=1 SV=3                                                 | THIO_HUMAN  | ?       | 0.960421376 | 1           | 11.052      | 86.583  | 57.853  | 45.458  | 68.618  | 45.11   |         |
| 1587 | TRUE | Empty | Thioredoxin reductase 1, cytoplasmic OS=Homo sapiens GN=TXNRD1 PE=1 SV=3                     | TRXR1_HUMAN | ?       | TRUE        | .828342834  | 1.1         | 4.06    | 22.95   | 5.47    | 12.669  | 13.554  | 11.277  |

|      |      |       |                                                                                                             |                   |         |      |             |             |      |        |         |         |         |         |
|------|------|-------|-------------------------------------------------------------------------------------------------------------|-------------------|---------|------|-------------|-------------|------|--------|---------|---------|---------|---------|
| 1588 | TRUE | Empty | Thioredoxin-dependent peroxide reductase, mitochondrial OS=Homo sapiens GN=PRDX3 PE=1 SV=3                  | PRDX3_HUMAN       | ?       | TRUE | .026384816  | 1.77125276  | 4.06 | 9.86   | 5.47    | 11.923  | 11.86   | 11.277  |
| 1589 | TRUE | Empty | Thioredoxin-like protein 1 OS=Homo sapiens GN=TXNL1 PE=1 SV=3                                               | TXNL1_HUMAN       | 32 kDa  |      | 0.950197635 | 1.1         | 2.03 | 2.0863 | 0       | 0       | 1.43    | 2.94    |
| 1590 | TRUE | Empty | Thioredoxin-related transmembrane protein 1 OS=Homo sapiens GN=TMX1 PE=1 SV=1                               | TMX1_HUMAN        | 32 kDa  |      | 0.1959113   | INF         | 0    | 0      | 0       | 10.433  | 0       | 3.91    |
| 1591 | TRUE | Empty | Thiosulfate sulfurtransferase/rhodanese-like domain-containing protein 1 OS=Homo sapiens GN=TSTD1 PE=1 SV=3 | TSTD1_HUMAN       | ?       |      | 0.373900966 | 0           | 0    | 2.0863 | 0       | 0       | 0       | 0       |
| 1592 | TRUE | Empty | THO complex subunit 4 OS=Homo sapiens GN=ALYREF PE=1 SV=3                                                   | THOC4_HUMAN       | 27 kDa  | TRUE | .433898909  | 1.5         | 2.03 | 1.0432 | 1.49    | 0.74522 | 3.85    | 3.91    |
| 1593 | TRUE | Empty | Threonine--tRNA ligase, cytoplasmic OS=Homo sapiens GN=TARS PE=1 SV=3                                       | SYTC_HUMAN        | ?       | TRUE | .180029522  | 2.3         | 0    | 5.59   | 9.46    | 5.17    | 13.554  | 15.976  |
| 1594 | TRUE | Empty | Thrombomodulin OS=Homo sapiens GN=THBD PE=1 SV=2                                                            | TRBM_HUMAN        | 60 kDa  |      | 0.373900966 | INF         | 0    | 0      | 0       | 1.04    | 0       | 0       |
| 1595 | TRUE | Empty | Thrombospondin-1 OS=Homo sapiens GN=THBS1 PE=1 SV=2                                                         | TSP1_HUMAN        | ?       | TRUE | .373900966  | 0           | 0    | 0      | 2.24    | 0       | 0       | 0       |
| 1596 | TRUE | Empty | THUMP domain-containing protein 1 OS=Homo sapiens GN=THUMPD1 PE=1 SV=2                                      | THUM1_HUMAN       | 39 kDa  |      | 0.803629916 | 0.9         | 0    | 2.0863 | 2.24    | 0.74522 | 1.43    | 1.96    |
| 1597 | TRUE | Empty | Thymidine kinase, cytosolic OS=Homo sapiens GN=TK1 PE=1 SV=2                                                | KITH_HUMAN        | 25 kDa  |      | 0.295249008 | 6.6         | 0    | 0      | 0.99746 | 1.04    | 5.0828  | 0       |
| 1598 | TRUE | Empty | Thymidylate kinase OS=Homo sapiens GN=DTYMK PE=1 SV=4                                                       | KTHY_HUMAN        | ?       |      | 0.228112223 | 2.1         | 0    | 3.1295 | 0.99746 | 2.57    | 2.14    | 3.91    |
| 1599 | TRUE | Empty | Thymosin beta-4 OS=Homo sapiens GN=TMSB4X PE=1 SV=2                                                         | TYB4_HUMAN        | 5 kDa   |      | 0.321611456 | 0.1         | 8.13 | 5.59   | 80.794  | 8.74    | 0       | 2.94    |
| 1600 | TRUE | Empty | Thyroid hormone receptor-associated protein 3 OS=Homo sapiens GN=THRAP3 PE=1 SV=2                           | TR150_HUMAN       | 109 kDa | TRUE | .839829928  | 0.9         | 0    | 5.59   | 4.73    | 4.13    | 1.43    | 2.94    |
| 1601 | TRUE | Empty | Thyroid receptor-interacting protein 11 OS=Homo sapiens GN=TRIP11 PE=1 SV=3                                 | TRIPB_HUMAN       | 228 kDa | TRUE | .204964682  | 4.4         | 0    | 0      | 0.99746 | 0.74522 | 0.84713 | 2.94    |
| 1602 | TRUE | Empty | Thyroid receptor-interacting protein 6 OS=Homo sapiens GN=TRIP6 PE=1 SV=3                                   | TRIP6_HUMAN       | ?       |      | 0.924061527 | 0.9         | 0    | 10.432 | 4.73    | 8.26    | 2.14    | 2.94    |
| 1603 | TRUE | Empty | Thyroxine-binding globulin OS=Homo sapiens GN=SERPINA7 PE=1 SV=2                                            | THBG_HUMAN        | 46 kDa  |      | 0.373900966 | 0           | 0    | 0      | 2.24    | 0       | 0       | 0       |
| 1604 | TRUE | Empty | Tight junction protein ZO-1 OS=Homo sapiens GN=TJP1 PE=1 SV=3                                               | ZO1_HUMAN         | ?       | TRUE | .145035574  | 0.3         | 2.03 | 11.475 | 12.967  | 2.09    | 3.85    | 1.96    |
| 1605 | TRUE | Empty | Tight junction protein ZO-2 OS=Homo sapiens GN=TJP2 PE=1 SV=2                                               | ZO2_HUMAN         | ?       | TRUE | .446758635  | 2           | 0    | 0      | 1.49    | 2.57    | 0.84713 | 0.93978 |
| 1606 | TRUE | Empty | Tissue alpha-L-fucosidase OS=Homo sapiens GN=FUCA1 PE=1 SV=4                                                | FUCO_HUMAN        | 54 kDa  | TRUE | .289681027  | 3.4         | 0    | 1.0432 | 0       | 0       | 1.43    | 1.96    |
| 1607 | TRUE | Empty | Titin OS=Homo sapiens GN=TTN PE=1 SV=4                                                                      | TITIN_HUMAN       | ?       | TRUE | .660953421  | 0.5         | 0    | 3.1295 | 0       | 1.04    | 0       | 0       |
| 1608 | TRUE | Empty | TITIN_HUMAN-DECOY                                                                                           | TITIN_HUMAN-DECOY | ?       | TRUE | .003651919  | 4.134982856 | 0    | 0      | 0.99746 | 1.04    | 1.43    | 0.93978 |
| 1609 | TRUE | Empty | Torsin-1A-interacting protein 1 OS=Homo sapiens GN=TOR1AIP1 PE=1 SV=2                                       | TOIP1_HUMAN       | ?       | TRUE | .141140807  | INF         | 0    | 0      | 0       | 2.57    | 0       | 3.91    |
| 1610 | TRUE | Empty | Trafficking protein particle complex subunit 3 OS=Homo sapiens GN=TRAPPC3 PE=1 SV=1                         | TPPC3_HUMAN       | ?       |      | 0.373900966 | INF         | 0    | 0      | 0       | 0       | 2.14    | 0       |
| 1611 | TRUE | Empty | TRAF-type zinc finger domain-containing protein 1 OS=Homo sapiens GN=TRAFF1 PE=1 SV=1                       | TRAD1_HUMAN       | ?       |      | 0.373900966 | INF         | 0    | 0      | 0       | 2.57    | 0       | 0       |
| 1612 | TRUE | Empty | Transaldolase OS=Homo sapiens GN=TALDO1 PE=1 SV=2                                                           | TALDO_HUMAN       | 38 kDa  | TRUE | .038552668  | 2.471274364 | 2.03 | 5.59   | 10.972  | 14.904  | 12.707  | 17.856  |
| 1613 | TRUE | Empty | Transcription elongation factor A protein 1 OS=Homo sapiens GN=TCEA1 PE=1 SV=2                              | TCEA1_HUMAN       | ?       | TRUE | .743633189  | 0.7         | 0    | 1.0432 | 8.71    | 1.04    | 1.43    | 3.91    |
| 1614 | TRUE | Empty | Transcription elongation factor A protein-like 4 OS=Homo sapiens GN=TCEAL4 PE=1 SV=2                        | TCAL4_HUMAN       | ?       | TRUE | .660925434  | 0.7         | 0    | 3.1295 | 1.49    | 0       | 1.43    | 1.96    |
| 1615 | TRUE | Empty | Transcription elongation factor SPT5 OS=Homo sapiens GN=SUPT5H PE=1 SV=1                                    | SPT5H_HUMAN       | ?       | TRUE | .005538615  | 3.285655565 | 0    | 0      | 0.99746 | 1.04    | 0.84713 | 0.93978 |

|      |      |       |                                                                                             |              |         |      |             |             |         |         |         |         |         |         |
|------|------|-------|---------------------------------------------------------------------------------------------|--------------|---------|------|-------------|-------------|---------|---------|---------|---------|---------|---------|
| 1616 | TRUE | Empty | Transcription elongation factor SPT6 OS=Homo sapiens<br>GN=SUPT6H PE=1 SV=2                 | SPT6H_HUMAN  | ?       | TRUE | .145322396  | INF         | 0       | 0       | 0       | 1.04    | 0.84713 | 0       |
| 1617 | TRUE | Empty | Transcription elongation regulator 1 OS=Homo sapiens<br>GN=TCERG1 PE=1 SV=2                 | TCERG1_HUMAN | ?       | TRUE | 0.91323029  | 0.9         | 0       | 3.1295  | 2.24    | 3.61    | 0       | 1.96    |
| 1618 | TRUE | Empty | Transcription factor 25 OS=Homo sapiens GN=TCF25 PE=1 SV=1                                  | TCF25_HUMAN  | 77 kDa  | TRUE | .023730014  | 6.571491589 | 0       | 0       | 0.99746 | 2.09    | 1.43    | 1.96    |
| 1619 | TRUE | Empty | Transcription factor BTF3 homolog 4 OS=Homo sapiens<br>GN=BTF3L4 PE=1 SV=1                  | BT3L4_HUMAN  | ?       | TRUE | .373900966  | INF         | 0       | 0       | 0       | 1.04    | 0       | 0       |
| 1620 | TRUE | Empty | Transcription factor BTF3 OS=Homo sapiens GN=BTF3 PE=1 SV=1                                 | BTF3_HUMAN   | ?       | TRUE | 0.71542278  | 0.8         | 0       | 8.54    | 5.47    | 4.13    | 0.84713 | 5.87    |
| 1621 | TRUE | Empty | Transcription factor jun-B OS=Homo sapiens GN=JUNB PE=1 SV=1                                | JUNB_HUMAN   | 36 kDa  |      | 0.163162035 | 0           | 0       | 2.0863  | 0.99746 | 0       | 0       | 0       |
| 1622 | TRUE | Empty | Transcription intermediary factor 1-beta OS=Homo sapiens<br>GN=TRIM28 PE=1 SV=5             | TIF1B_HUMAN  | ?       |      | 0.05275731  | 2.2         | 28.734  | 10.432  | 7.97    | 33.535  | 31.344  | 38.531  |
| 1623 | TRUE | Empty | Transcriptional activator protein Pur-alpha OS=Homo sapiens<br>GN=PURA PE=1 SV=2            | PURA_HUMAN   | 35 kDa  | TRUE | 0.41446157  | 0.5         | 2.03    | 1.0432  | 5.47    | 1.04    | 2.14    | 0.93978 |
| 1624 | TRUE | Empty | Transcriptional repressor p66-alpha OS=Homo sapiens<br>GN=GATAD2A PE=1 SV=1                 | P66A_HUMAN   | ?       | TRUE | .397222029  | 0.2         | 0       | 1.0432  | 4.73    | 1.04    | 0       | 0       |
| 1625 | TRUE | Empty | Transducin beta-like protein 2 OS=Homo sapiens GN=TBL2 PE=1<br>SV=1                         | TBL2_HUMAN   | 50 kDa  | TRUE | .005538615  | 3.285655565 | 0.99746 | 0       | 0       | 1.04    | 0.84713 | 0.93978 |
| 1626 | TRUE | Empty | Transferrin receptor protein 1 OS=Homo sapiens GN=TFRC PE=1<br>SV=2                         | TFR1_HUMAN   | 85 kDa  |      | 0.001271201 | 13.99396773 | 6.631   | 0       | 0       | 33.535  | 33.885  | 25.374  |
| 1627 | TRUE | Empty | Transformer-2 protein homolog alpha OS=Homo sapiens<br>GN=TRA2A PE=1 SV=1                   | TRA2A_HUMAN  | ?       | TRUE | .485393711  | 0.7         | 2.03    | 5.59    | 1.49    | 1.04    | 2.14    | 2.94    |
| 1628 | TRUE | Empty | Transformer-2 protein homolog beta OS=Homo sapiens<br>GN=TRA2B PE=1 SV=1                    | TRA2B_HUMAN  | ?       | TRUE | .010181353  | 0,0         | 2.03    | 2.0863  | 0.99746 | 0       | 0.84713 | 0       |
| 1629 | TRUE | Empty | Transforming protein RhoA OS=Homo sapiens GN=RHOA PE=1<br>SV=1                              | RHOA_HUMAN   | 22 kDa  | TRUE | .021213739  | 18.89800092 | 0       | 0       | 0.99746 | 5.65    | 4.57    | 9.78    |
| 1630 | TRUE | Empty | Transgelin-2 OS=Homo sapiens GN=TAGLN2 PE=1 SV=3                                            | TAGL2_HUMAN  | ?       | TRUE | .805582053  | 1.1         | 19.893  | 76.152  | 66.83   | 44.713  | 55.911  | 78.002  |
| 1631 | TRUE | Empty | Transitional endoplasmic reticulum ATPase OS=Homo sapiens<br>GN=VCP PE=1 SV=4               | TERA_HUMAN   | 89 kDa  | TRUE | .260783834  | 0.6         | 53.048  | 156.48  | 113.71  | 59.617  | 83.866  | 57.327  |
| 1632 | TRUE | Empty | Transketolase OS=Homo sapiens GN=TKT PE=1 SV=3                                              | TKT_HUMAN    | ?       | TRUE | .182938374  | 0.5         | 72.941  | 187.77  | 155.6   | 111.78  | 69.465  | 45.11   |
| 1633 | TRUE | Empty | Translation initiation factor eIF-2B subunit alpha OS=Homo<br>sapiens GN=EIF2B1 PE=1 SV=1   | EI2BA_HUMAN  | ?       | TRUE | .009521936  | 4.227868787 | 0       | 0.99746 | 0       | 1.04    | 0.84713 | 1.96    |
| 1634 | TRUE | Empty | Translation initiation factor eIF-2B subunit epsilon OS=Homo<br>sapiens GN=EIF2B5 PE=1 SV=3 | EI2BE_HUMAN  | 80 kDa  | TRUE | .000114504  | 5.077196078 | 0.99746 | 0       | 0       | 1.04    | 1.43    | 1.96    |
| 1635 | TRUE | Empty | Translational activator GCN1 OS=Homo sapiens GN=GCN1L1 PE=1<br>SV=6                         | GCN1L_HUMAN  | 293 kDa | TRUE | .007958061  | 9.413228375 | 11.052  | 0       | 0       | 29.064  | 44.898  | 30.073  |
| 1636 | TRUE | Empty | Translational activator of cytochrome c oxidase 1 OS=Homo<br>sapiens GN=TACO1 PE=1 SV=1     | TACO1_HUMAN  | 32 kDa  |      | 0.06335845  | INF         | 0       | 0       | 0       | 5.65    | 0.84713 | 3.91    |
| 1637 | TRUE | Empty | Translationaly-controlled tumor protein OS=Homo sapiens<br>GN=TPT1 PE=1 SV=1                | TCTP_HUMAN   | ?       | TRUE | .962596211  | 1           | 8.13    | 8.54    | 11.969  | 5.17    | 5.0828  | 18.796  |
| 1638 | TRUE | Empty | Translin OS=Homo sapiens GN=TSN PE=1 SV=1                                                   | TSN_HUMAN    | ?       |      | 0.241857663 | 5.7         | 0       | 1.0432  | 0       | 0.74522 | 4.57    | 0.93978 |
| 1639 | TRUE | Empty | Translin-associated protein X OS=Homo sapiens GN=TSNAX PE=1<br>SV=1                         | TSNAX_HUMAN  | 33 kDa  |      | 0.270866    | 2.3         | 2.03    | 0       | 0       | 1.04    | 1.43    | 1.96    |
| 1640 | TRUE | Empty | Translocon-associated protein subunit delta OS=Homo sapiens<br>GN=SSR4 PE=1 SV=1            | SSRD_HUMAN   | 19 kDa  |      | 0.016503714 | 4.975066669 | 0       | 0.99746 | 0       | 2.57    | 0.84713 | 1.96    |
| 1641 | TRUE | Empty | Transmembrane emp24 domain-containing protein 10 OS=Homo<br>sapiens GN=TMED10 PE=1 SV=2     | TMEDA_HUMAN  | 25 kDa  | TRUE | 0.0263936   | 8.865402886 | 2.03    | 0       | 0       | 5.17    | 4.57    | 9.78    |
| 1642 | TRUE | Empty | Transmembrane emp24 domain-containing protein 2 OS=Homo<br>sapiens GN=TMED2 PE=1 SV=1       | TMED2_HUMAN  | 23 kDa  |      | 0.003020465 | 5.926453191 | 0       | 0       | 0.99746 | 1.04    | 2.14    | 1.96    |
| 1643 | TRUE | Empty | Transmembrane emp24 domain-containing protein 7 OS=Homo<br>sapiens GN=TMED7 PE=1 SV=2       | TMED7_HUMAN  | ?       | TRUE | .291574741  | 2.6         | 2.03    | 0       | 0       | 2.09    | 0.84713 | 1.96    |

|      |      |       |                                                                                         |             |        |      |             |             |         |         |        |         |         |         |
|------|------|-------|-----------------------------------------------------------------------------------------|-------------|--------|------|-------------|-------------|---------|---------|--------|---------|---------|---------|
| 1644 | TRUE | Empty | Transmembrane emp24 domain-containing protein 9 OS=Homo sapiens GN=TMED9 PE=1 SV=2      | TMED9_HUMAN | 27 kDa | TRUE | .013989976  | 7.724019364 | 2.03    | 0       | 0      | 4.13    | 5.0828  | 7.83    |
| 1645 | TRUE | Empty | Transmembrane protein 14C OS=Homo sapiens GN=TMEM14C PE=1 SV=1                          | TM14C_HUMAN | 12 kDa |      | 0.000720974 | 12.60000401 | 0.99746 | 0       | 0      | 3.61    | 5.0828  | 3.91    |
| 1646 | TRUE | Empty | Transmembrane protein 205 OS=Homo sapiens GN=TMEM205 PE=1 SV=1                          | TM205_HUMAN | 21 kDa |      | 0.103134221 | 3.9         | 2.03    | 0       | 0      | 1.04    | 3.85    | 3.91    |
| 1647 | TRUE | Empty | Transmembrane protein 263 OS=Homo sapiens GN=TMEM263 PE=1 SV=1                          | TM263_HUMAN | 12 kDa |      | 0.215724507 | 0.1         | 0       | 4.1727  | 1.49   | 0.74522 | 0       | 0       |
| 1648 | TRUE | Empty | Transmembrane protein 33 OS=Homo sapiens GN=TMEM33 PE=1 SV=2                            | TMM33_HUMAN | 28 kDa |      | 0.009521936 | 4.227868787 | 0       | 0.99746 | 0      | 1.04    | 0.84713 | 1.96    |
| 1649 | TRUE | Empty | Transportin-1 OS=Homo sapiens GN=TNPO1 PE=1 SV=2                                        | TNPO1_HUMAN | ?      | TRUE | 0.15131275  | INF         | 0       | 0       | 0      | 1.04    | 0.84713 | 5.87    |
| 1650 | TRUE | Empty | Transportin-2 OS=Homo sapiens GN=TNPO2 PE=1 SV=3                                        | TNPO2_HUMAN | ?      | TRUE | .152473369  | INF         | 0       | 0       | 0      | 2.09    | 0       | 5.87    |
| 1651 | TRUE | Empty | Transportin-3 OS=Homo sapiens GN=TNPO3 PE=1 SV=3                                        | TNPO3_HUMAN | ?      |      | 0.008380466 | 6.019389249 | 0       | 0.99746 | 0      | 1.04    | 1.43    | 2.94    |
| 1652 | TRUE | Empty | Treacle protein OS=Homo sapiens GN=TCOF1 PE=1 SV=3                                      | TCOF_HUMAN  | ?      | TRUE | .474214831  | 0.5         | 0       | 5.59    | 3.98   | 0       | 0.84713 | 3.91    |
| 1653 | TRUE | Empty | Tricarboxylate transport protein, mitochondrial OS=Homo sapiens GN=SLC25A1 PE=1 SV=2    | TXTP_HUMAN  | 34 kDa | TRUE | .000034285  | 20.11368877 | 0       | 0.99746 | 0      | 6.707   | 6.71    | 6.85    |
| 1654 | TRUE | Empty | Trifunctional enzyme subunit alpha, mitochondrial OS=Homo sapiens GN=HADHA PE=1 SV=2    | ECHA_HUMAN  | ?      |      | 0.096816221 | 3.2         | 17.683  | 0       | 0      | 18.63   | 21.178  | 16.916  |
| 1655 | TRUE | Empty | Trifunctional enzyme subunit beta, mitochondrial OS=Homo sapiens GN=HADHB PE=1 SV=3     | ECHB_HUMAN  | ?      |      | 0.122067973 | 2.8         | 6.631   | 1.0432  | 1.49   | 11.178  | 4.57    | 11.277  |
| 1656 | TRUE | Empty | Trifunctional purine biosynthetic protein adenosine-3 OS=Homo sapiens GN=GART PE=1 SV=1 | PUR2_HUMAN  | ?      | TRUE | .000558724  | 23.78942514 | 0       | 0.99746 | 0      | 6.707   | 7.42    | 9.78    |
| 1657 | TRUE | Empty | Triokinase/FMN cyclase OS=Homo sapiens GN=TKFC PE=1 SV=2                                | TKFC_HUMAN  | ?      |      | 0.006836668 | 17.97445512 | 0       | 0.99746 | 0      | 3.61    | 7.42    | 6.85    |
| 1658 | TRUE | Empty | Triosephosphate isomerase OS=Homo sapiens GN=TP1 PE=1 SV=3                              | TPIS_HUMAN  | ?      |      | 0.210925012 | 0.6         | 112.73  | 306.69  | 197.5  | 105.08  | 122.83  | 135.33  |
| 1659 | TRUE | Empty | Tripartite motif-containing protein 16 OS=Homo sapiens GN=TRIM16 PE=1 SV=3              | TRI16_HUMAN | ?      | TRUE | .000114422  | 7.615844244 | 0       | 0.99746 | 0      | 2.57    | 2.14    | 2.94    |
| 1660 | TRUE | Empty | tRNA (cytosine(34)-C(5))-methyltransferase OS=Homo sapiens GN=NSUN2 PE=1 SV=2           | NSUN2_HUMAN | ?      |      | 0.532669165 | 1.7         | 2.03    | 1.0432  | 1.49   | 0.74522 | 1.43    | 6.85    |
| 1661 | TRUE | Empty | tRNA pseudouridine synthase A, mitochondrial OS=Homo sapiens GN=PUS1 PE=1 SV=3          | TRUA_HUMAN  | ?      |      | 0.136121777 | INF         | 0       | 0       | 0      | 1.04    | 0       | 0.93978 |
| 1662 | TRUE | Empty | tRNA-splicing ligase RtcB homolog OS=Homo sapiens GN=RTCB PE=1 SV=1                     | RTCB_HUMAN  | 55 kDa |      | 0.524532376 | 0.7         | 2.03    | 13.561  | 17.954 | 4.13    | 8.13    | 10.338  |
| 1663 | TRUE | Empty | Trophoblast glycoprotein OS=Homo sapiens GN=TPBG PE=1 SV=1                              | TPBG_HUMAN  | 46 kDa | TRUE | .311098858  | 3           | 2.03    | 5.59    | 0      | 5.65    | 15.248  | 1.96    |
| 1664 | TRUE | Empty | Tropomodulin-3 OS=Homo sapiens GN=TMOD3 PE=1 SV=1                                       | TMOD3_HUMAN | 40 kDa | TRUE | .890400991  | 1.1         | 0       | 3.1295  | 7.97   | 1.04    | 3.85    | 7.83    |
| 1665 | TRUE | Empty | Tropomyosin alpha-1 chain OS=Homo sapiens GN=TPM1 PE=1 SV=2                             | TPM1_HUMAN  | ?      | TRUE | .313354953  | 0.6         | 13.262  | 14.604  | 39.898 | 11.923  | 12.707  | 13.157  |
| 1666 | TRUE | Empty | Tropomyosin alpha-3 chain OS=Homo sapiens GN=TPM3 PE=1 SV=2                             | TPM3_HUMAN  | ?      | TRUE | .486832596  | 0.6         | 15.472  | 10.432  | 51.868 | 14.904  | 17.79   | 15.037  |
| 1667 | TRUE | Empty | Tropomyosin alpha-4 chain OS=Homo sapiens GN=TPM4 PE=1 SV=3                             | TPM4_HUMAN  | ?      | TRUE | 0.20339762  | 0.4         | 41.996  | 32.338  | 107.73 | 27.573  | 26.261  | 19.735  |
| 1668 | TRUE | Empty | Tropomyosin beta chain OS=Homo sapiens GN=TPM2 PE=1 SV=1                                | TPM2_HUMAN  | ?      | TRUE | .206851653  | 0.4         | 26.524  | 25.036  | 79.797 | 18.63   | 18.637  | 12.217  |
| 1669 | TRUE | Empty | Tryptophan--tRNA ligase, cytoplasmic OS=Homo sapiens GN=WARS PE=1 SV=2                  | SYWC_HUMAN  | ?      |      | 0.427578962 | 1.7         | 0       | 14.604  | 2.24   | 11.923  | 9.85    | 8.81    |
| 1670 | TRUE | Empty | Tubulin alpha-1A chain OS=Homo sapiens GN=TUBA1A PE=1 SV=1                              | TBA1A_HUMAN | ?      | TRUE | .722320238  | 1.2         | 243.14  | 56.331  | 62.84  | 128.92  | 177.05  | 128.75  |
| 1671 | TRUE | Empty | Tubulin alpha-1B chain OS=Homo sapiens GN=TUBA1B PE=1 SV=1                              | TBA1B_HUMAN | ?      | TRUE | .997543402  | 1           | 495.11  | 67.806  | 69.822 | 176.62  | 284.64  | 172.92  |
| 1672 | TRUE | Empty | Tubulin beta chain OS=Homo sapiens GN=TUBB PE=1 SV=2                                    | TBB5_HUMAN  | 50 kDa | TRUE | .930302619  | 1           | 320.5   | 167.95  | 179.54 | 251.14  | 218.56  | 212.39  |

|      |      |       |                                                                                                 |             |        |      |             |             |         |         |         |         |         |         |
|------|------|-------|-------------------------------------------------------------------------------------------------|-------------|--------|------|-------------|-------------|---------|---------|---------|---------|---------|---------|
| 1673 | TRUE | Empty | Tubulin beta-2B chain OS=Homo sapiens GN=TUBB2B PE=1 SV=1                                       | TBB2B_HUMAN | 50 kDa | TRUE | .966707905  | 1           | 249.77  | 129.35  | 126.68  | 210.9   | 160.96  | 140.03  |
| 1674 | TRUE | Empty | Tubulin beta-3 chain OS=Homo sapiens GN=TUBB3 PE=1 SV=2                                         | TBB3_HUMAN  | ?      | TRUE | .913679859  | 1           | 134.83  | 119.96  | 108.72  | 107.31  | 129.61  | 123.11  |
| 1675 | TRUE | Empty | Tubulin beta-4B chain OS=Homo sapiens GN=TUBB4B PE=1 SV=1                                       | TBB4B_HUMAN | 50 kDa | TRUE | .975531506  | 1           | 305.02  | 172.12  | 183.53  | 242.94  | 216.02  | 197.35  |
| 1676 | TRUE | Empty | Tubulin beta-6 chain OS=Homo sapiens GN=TUBB6 PE=1 SV=1                                         | TBB6_HUMAN  | 50 kDa | TRUE | .680724659  | 0.9         | 128.2   | 74.065  | 86.779  | 70.051  | 105.89  | 87.4    |
| 1677 | TRUE | Empty | Tubulin-folding cofactor B OS=Homo sapiens GN=TBCB PE=1 SV=2                                    | TBCB_HUMAN  | ?      |      | 0.864004896 | 1.2         | 0       | 0       | 1.49    | 1.04    | 0       | 0.93978 |
| 1678 | TRUE | Empty | Tubulin-specific chaperone A OS=Homo sapiens GN=TBCA PE=1 SV=3                                  | TBCA_HUMAN  | ?      |      | 0.450034554 | 0.6         | 4.06    | 8.54    | 18.952  | 8.26    | 5.99    | 5.87    |
| 1679 | TRUE | Empty | Tubulin-specific chaperone D OS=Homo sapiens GN=TBCE PE=1 SV=2                                  | TBCD_HUMAN  | ?      |      | 0.011102006 | 8.685447892 | 0       | 0       | 1.49    | 7.22    | 4.57    | 5.87    |
| 1680 | TRUE | Empty | Tubulin-specific chaperone E OS=Homo sapiens GN=TBCE PE=1 SV=1                                  | TBCE_HUMAN  | ?      |      | 0.384988624 | 3.7         | 0       | 1.0432  | 0       | 2.09    | 0.84713 | 0       |
| 1681 | TRUE | Empty | Tubulin--tyrosine ligase-like protein 12 OS=Homo sapiens GN=TTLL12 PE=1 SV=2                    | TTL12_HUMAN | 74 kDa | TRUE | .119086248  | INF         | 0       | 0       | 0       | 2.57    | 0       | 1.96    |
| 1682 | TRUE | Empty | Tumor protein D52 OS=Homo sapiens GN=TPD52 PE=1 SV=2                                            | TPD52_HUMAN | ?      | TRUE | .503208195  | 0.6         | 0       | 20.863  | 11.969  | 5.65    | 7.42    | 6.85    |
| 1683 | TRUE | Empty | Tumor protein D53 OS=Homo sapiens GN=TPD52L1 PE=1 SV=1                                          | TPD53_HUMAN | ?      | TRUE | .453013153  | 0.5         | 0       | 14.604  | 6.22    | 3.61    | 2.14    | 4.89    |
| 1684 | TRUE | Empty | Tumor protein D54 OS=Homo sapiens GN=TPD52L2 PE=1 SV=2                                          | TPD54_HUMAN | ?      |      | 0.9484979   | 1           | 13.262  | 35.468  | 19.949  | 17.885  | 28.803  | 23.495  |
| 1685 | TRUE | Empty | Tumor-associated calcium signal transducer 2 OS=Homo sapiens GN=TACSTD2 PE=1 SV=3               | TACD2_HUMAN | 36 kDa | TRUE | .009521936  | 4.227868787 | 0.99746 | 0       | 0       | 1.04    | 0.84713 | 1.96    |
| 1686 | TRUE | Empty | Twinfilin-1 OS=Homo sapiens GN=TWF1 PE=1 SV=3                                                   | TWF1_HUMAN  | ?      | TRUE | .017661144  | 6.775710304 | 0       | 0.99746 | 0       | 1.04    | 3.85    | 1.96    |
| 1687 | TRUE | Empty | Twinfilin-2 OS=Homo sapiens GN=TWF2 PE=1 SV=2                                                   | TWF2_HUMAN  | 40 kDa | TRUE | .943595292  | 0.9         | 0       | 1.0432  | 0.99746 | 0       | 0       | 1.96    |
| 1688 | TRUE | Empty | Type 1 phosphatidylinositol 4,5-bisphosphate 4-phosphatase OS=Homo sapiens GN=TMEM55B PE=1 SV=1 | TM55B_HUMAN | ?      |      | 0.080922552 | INF         | 0       | 0       | 0       | 0.74522 | 1.43    | 3.91    |
| 1689 | TRUE | Empty | Type II inositol 3,4-bisphosphate 4-phosphatase OS=Homo sapiens GN=INPP4B PE=2 SV=4             | INP4B_HUMAN | ?      | TRUE | .000160132  | 16.76565425 | 0       | 1.0432  | 0.99746 | 11.923  | 11.013  | 11.277  |
| 1690 | TRUE | Empty | Tyrosine-protein phosphatase non-receptor type 1 OS=Homo sapiens GN=PTPN1 PE=1 SV=1             | PTN1_HUMAN  | 50 kDa |      | 0.143783106 | 3.9         | 2.03    | 0       | 0       | 1.04    | 2.14    | 4.89    |
| 1691 | TRUE | Empty | Tyrosine-protein phosphatase non-receptor type 11 OS=Homo sapiens GN=PTPN11 PE=1 SV=2           | PTN11_HUMAN | ?      | TRUE | .231711402  | INF         | 0       | 0       | 0       | 0.74522 | 0       | 2.94    |
| 1692 | TRUE | Empty | Tyrosine--tRNA ligase, cytoplasmic OS=Homo sapiens GN=YARS PE=1 SV=4                            | SYYC_HUMAN  | 59 kDa | TRUE | 0.16325979  | 1.7         | 2.03    | 4.1727  | 7.97    | 6.707   | 7.42    | 10.338  |
| 1693 | TRUE | Empty | U1 small nuclear ribonucleoprotein 70 kDa OS=Homo sapiens GN=SNRNP70 PE=1 SV=2                  | RU17_HUMAN  | ?      |      | 0.556868603 | 0.6         | 4.06    | 4.1727  | 0.99746 | 1.04    | 0       | 4.89    |
| 1694 | TRUE | Empty | U2 small nuclear ribonucleoprotein A' OS=Homo sapiens GN=SNRPA1 PE=1 SV=2                       | RU2A_HUMAN  | 28 kDa |      | 0.791336004 | 1.2         | 0       | 9.86    | 8.71    | 3.61    | 10.166  | 7.83    |
| 1695 | TRUE | Empty | U2 small nuclear ribonucleoprotein B'' OS=Homo sapiens GN=SNRPB2 PE=1 SV=1                      | RU2B_HUMAN  | 25 kDa | TRUE | .212051675  | 3.4         | 0       | 1.0432  | 0.99746 | 0.74522 | 4.57    | 1.96    |
| 1696 | TRUE | Empty | U2 snRNP-associated SURP motif-containing protein OS=Homo sapiens GN=U2SURP PE=1 SV=2           | SR140_HUMAN | ?      | TRUE | .000114504  | 5.077196078 | 0       | 0.99746 | 0       | 1.04    | 1.43    | 1.96    |
| 1697 | TRUE | Empty | U4/U6 small nuclear ribonucleoprotein Prp31 OS=Homo sapiens GN=PRPF31 PE=1 SV=2                 | PRP31_HUMAN | ?      | TRUE | .105819574  | INF         | 0       | 0       | 0       | 0.74522 | 2.14    | 5.87    |
| 1698 | TRUE | Empty | U4/U6 small nuclear ribonucleoprotein Prp4 OS=Homo sapiens GN=PRPF4 PE=1 SV=2                   | PRP4_HUMAN  | ?      | TRUE | .017276814  | 4.37728617  | 0       | 2.0863  | 0.99746 | 4.13    | 3.85    | 5.87    |
| 1699 | TRUE | Empty | U4/U6.U5 tri-snRNP-associated protein 1 OS=Homo sapiens GN=SART1 PE=1 SV=1                      | SNUT1_HUMAN | 90 kDa | TRUE | .963269819  | 1           | 0       | 5.59    | 4.73    | 4.13    | 1.43    | 3.91    |

|      |      |       |                                                                                              |             |        |      |             |             |         |        |         |         |         |         |
|------|------|-------|----------------------------------------------------------------------------------------------|-------------|--------|------|-------------|-------------|---------|--------|---------|---------|---------|---------|
| 1700 | TRUE | Empty | U4/U6.U5 tri-snRNP-associated protein 2 OS=Homo sapiens<br>GN=USP39 PE=1 SV=2                | SNUT2_HUMAN | ?      |      | 0.601935698 | 2.5         | 0       | 0      | 0.99746 | 0       | 2.14    | 0       |
| 1701 | TRUE | Empty | U5 small nuclear ribonucleoprotein 200 kDa helicase OS=Homo sapiens<br>GN=SNRNP200 PE=1 SV=2 | U520_HUMAN  | ?      | TRUE | .034946445  | 6.036216394 | 8.13    | 0      | 0       | 24.592  | 11.86   | 16.916  |
| 1702 | TRUE | Empty | U5 small nuclear ribonucleoprotein 40 kDa protein OS=Homo sapiens<br>GN=SNRNP40 PE=1 SV=1    | SNR40_HUMAN | ?      |      | 0.10952434  | 2.8         | 0       | 1.0432 | 0.99746 | 2.57    | 2.14    | 0.93978 |
| 1703 | TRUE | Empty | U6 snRNA-associated Sm-like protein LSm2 OS=Homo sapiens<br>GN=LSM2 PE=1 SV=1                | LSM2_HUMAN  | 11 kDa |      | 0.196672229 | 0.4         | 2.03    | 2.0863 | 0.99746 | 0       | 0       | 1.96    |
| 1704 | TRUE | Empty | U6 snRNA-associated Sm-like protein LSm8 OS=Homo sapiens<br>GN=LSM8 PE=1 SV=3                | LSM8_HUMAN  | 10 kDa |      | 0.229657678 | 0.2         | 4.06    | 0      | 2.24    | 1.04    | 0       | 0       |
| 1705 | TRUE | Empty | Ubiquilin-1 OS=Homo sapiens GN=UBQLN1 PE=1 SV=2                                              | UBQL1_HUMAN | ?      | TRUE | .175169842  | 0.5         | 8.13    | 30.252 | 21.944  | 11.178  | 11.013  | 7.83    |
| 1706 | TRUE | Empty | Ubiquilin-4 OS=Homo sapiens GN=UBQLN4 PE=1 SV=2                                              | UBQL4_HUMAN | ?      | TRUE | .218811624  | 0.5         | 4.06    | 11.475 | 13.964  | 8.74    | 2.14    | 4.89    |
| 1707 | TRUE | Empty | Ubiquitin carboxyl-terminal hydrolase 10 OS=Homo sapiens<br>GN=USP10 PE=1 SV=2               | UBP10_HUMAN | ?      | TRUE | .000114504  | 5.077196078 | 0       | 0      | 0.99746 | 1.04    | 1.43    | 1.96    |
| 1708 | TRUE | Empty | Ubiquitin carboxyl-terminal hydrolase 14 OS=Homo sapiens<br>GN=USP14 PE=1 SV=3               | UBP14_HUMAN | ?      | TRUE | .096081604  | 2.2         | 4.06    | 1.0432 | 2.24    | 5.17    | 4.57    | 8.81    |
| 1709 | TRUE | Empty | Ubiquitin carboxyl-terminal hydrolase 15 OS=Homo sapiens<br>GN=USP15 PE=1 SV=3               | UBP15_HUMAN | ?      | TRUE | .137246924  | 3.1         | 0       | 1.0432 | 0       | 1.04    | 0.84713 | 0.93978 |
| 1710 | TRUE | Empty | Ubiquitin carboxyl-terminal hydrolase 5 OS=Homo sapiens<br>GN=USP5 PE=1 SV=2                 | UBP5_HUMAN  | ?      | TRUE | .026849742  | 2.686749288 | 2.03    | 3.1295 | 1.49    | 4.13    | 6.71    | 8.81    |
| 1711 | TRUE | Empty | Ubiquitin carboxyl-terminal hydrolase 7 OS=Homo sapiens<br>GN=USP7 PE=1 SV=2                 | UBP7_HUMAN  | ?      |      | 0.030399489 | 15.53806669 | 0.99746 | 0      | 0       | 2.57    | 7.42    | 5.87    |
| 1712 | TRUE | Empty | Ubiquitin carboxyl-terminal hydrolase isozyme L3 OS=Homo sapiens<br>GN=UCHL3 PE=1 SV=1       | UCHL3_HUMAN | 26 kDa |      | 0.898254512 | 1.1         | 0       | 1.0432 | 1.49    | 1.04    | 0       | 1.96    |
| 1713 | TRUE | Empty | Ubiquitin conjugation factor E4 A OS=Homo sapiens GN=UBE4A<br>PE=1 SV=2                      | UBE4A_HUMAN | ?      |      | 0.031963678 | 6.664357468 | 0       | 0      | 0.99746 | 2.09    | 0.84713 | 2.94    |
| 1714 | TRUE | Empty | Ubiquitin conjugation factor E4 B OS=Homo sapiens GN=UBE4B<br>PE=1 SV=1                      | UBE4B_HUMAN | ?      |      | 0.124952625 | INF         | 0       | 0      | 0       | 0       | 2.14    | 1.96    |
| 1715 | TRUE | Empty | Ubiquitin domain-containing protein UBD1 OS=Homo sapiens<br>GN=UBFD1 PE=1 SV=2               | UBFD1_HUMAN | 33 kDa |      | 0.925926432 | 0.9         | 0       | 5.59   | 0.99746 | 2.57    | 2.14    | 0.93978 |
| 1716 | TRUE | Empty | Ubiquitin fusion degradation protein 1 homolog OS=Homo sapiens<br>GN=UFD1L PE=1 SV=3         | UFD1_HUMAN  | ?      |      | 0.862139202 | 1.1         | 0       | 5.59   | 4.73    | 1.04    | 3.85    | 6.85    |
| 1717 | TRUE | Empty | Ubiquitin thioesterase OTUB1 OS=Homo sapiens GN=OTUB1 PE=1<br>SV=2                           | OTUB1_HUMAN | ?      |      | 0.059167149 | 2.2         | 6.631   | 1.0432 | 4.73    | 10.433  | 9.85    | 7.83    |
| 1718 | TRUE | Empty | Ubiquitin-40S ribosomal protein S27a OS=Homo sapiens<br>GN=RPS27A PE=1 SV=2                  | RS27A_HUMAN | 18 kDa | TRUE | .527101643  | 0.6         | 50.837  | 13.561 | 23.939  | 42.477  | 5.99    | 5.87    |
| 1719 | TRUE | Empty | Ubiquitin-associated protein 2 OS=Homo sapiens GN=UBAP2 PE=1<br>SV=1                         | UBAP2_HUMAN | ?      | TRUE | 0.15359     | 0           | 0       | 1.0432 | 1.49    | 0       | 0       | 0       |
| 1720 | TRUE | Empty | Ubiquitin-associated protein 2-like OS=Homo sapiens GN=UBAP2L<br>PE=1 SV=2                   | UBP2L_HUMAN | ?      | TRUE | .859924228  | 0.9         | 2.03    | 6.259  | 8.71    | 3.61    | 5.99    | 6.85    |
| 1721 | TRUE | Empty | Ubiquitin-conjugating enzyme E2 A OS=Homo sapiens GN=UBE2A<br>PE=1 SV=2                      | UBE2A_HUMAN | ?      | TRUE | 0.63309427  | 1.5         | 0       | 1.0432 | 1.49    | 0.74522 | 0.84713 | 2.94    |
| 1722 | TRUE | Empty | Ubiquitin-conjugating enzyme E2 D3 OS=Homo sapiens<br>GN=UBE2D3 PE=1 SV=1                    | UB2D3_HUMAN | ?      |      | 0.132510102 | 4.1         | 0       | 2.0863 | 0       | 2.57    | 1.43    | 4.89    |
| 1723 | TRUE | Empty | Ubiquitin-conjugating enzyme E2 K OS=Homo sapiens GN=UBE2K<br>PE=1 SV=3                      | UBE2K_HUMAN | ?      |      | 0.098502269 | 2.7         | 2.03    | 5.59   | 0       | 7.22    | 4.57    | 8.81    |
| 1724 | TRUE | Empty | Ubiquitin-conjugating enzyme E2 L3 OS=Homo sapiens<br>GN=UBE2L3 PE=1 SV=1                    | UB2L3_HUMAN | ?      |      | 0.036904884 | 0.632915255 | 11.052  | 15.648 | 11.969  | 7.22    | 7.42    | 9.78    |
| 1725 | TRUE | Empty | Ubiquitin-conjugating enzyme E2 N OS=Homo sapiens GN=UBE2N<br>PE=1 SV=1                      | UBE2N_HUMAN | 17 kDa |      | 0.062348734 | 0.6         | 11.052  | 9.86   | 10.972  | 4.13    | 9.85    | 5.87    |
| 1726 | TRUE | Empty | Ubiquitin-conjugating enzyme E2 variant 1 OS=Homo sapiens<br>GN=UBE2V1 PE=1 SV=2             | UB2V1_HUMAN | ?      | TRUE | .754889106  | 1.1         | 4.06    | 10.432 | 12.967  | 8.74    | 6.71    | 16.916  |

|      |      |       |                                                                                             |                  |         |      |             |             |         |         |         |         |         |         |
|------|------|-------|---------------------------------------------------------------------------------------------|------------------|---------|------|-------------|-------------|---------|---------|---------|---------|---------|---------|
| 1727 | TRUE | Empty | Ubiquitin-fold modifier 1 OS=Homo sapiens GN=UFM1 PE=1 SV=1                                 | UFM1_HUMAN       | ?       |      | 0.985338155 | 1           | 0       | 5.59    | 5.47    | 4.13    | 5.99    | 0.93978 |
| 1728 | TRUE | Empty | Ubiquitin-like modifier-activating enzyme 1 OS=Homo sapiens GN=UBA1 PE=1 SV=3               | UBA1_HUMAN       | ?       | TRUE | .037461083  | 2.26131865  | 35.365  | 9.86    | 14.962  | 41.732  | 49.134  | 44.17   |
| 1729 | TRUE | Empty | Ubiquitin-like protein ISG15 OS=Homo sapiens GN=ISG15 PE=1 SV=5                             | ISG15_HUMAN      | 18 kDa  |      | 0.857764027 | 0.8         | 35.365  | 3.1295  | 0       | 14.159  | 9.85    | 8.81    |
| 1730 | TRUE | Empty | Ubiquitin-protein ligase E3A OS=Homo sapiens GN=UBE3A PE=1 SV=4                             | UBE3A_HUMAN      | ?       | TRUE | .169759736  | INF         | 0       | 0       | 0       | 0       | 0.84713 | 1.96    |
| 1731 | TRUE | Empty | UBP8_HUMAN-DECOY                                                                            | UBP8_HUMAN-DECOY | ?       | TRUE | .373900966  | INF         | 0       | 0       | 0       | 0       | 1.43    | 0       |
| 1732 | TRUE | Empty | UBX domain-containing protein 7 OS=Homo sapiens GN=UBXN7 PE=1 SV=2                          | UBXN7_HUMAN      | 55 kDa  |      | 0.92881698  | 0.9         | 0       | 0       | 1.49    | 0       | 0.84713 | 0.93978 |
| 1733 | TRUE | Empty | UDP-glucose 6-dehydrogenase OS=Homo sapiens GN=UGDH PE=1 SV=1                               | UGDH_HUMAN       | ?       |      | 0.241076102 | 0.8         | 132.62  | 154.39  | 102.74  | 114.02  | 115.21  | 90.219  |
| 1734 | TRUE | Empty | UDP-glucose:glycoprotein glucosyltransferase 1 OS=Homo sapiens GN=UGGT1 PE=1 SV=3           | UGGT1_HUMAN      | ?       | TRUE | .136603418  | 3.1         | 8.13    | 0       | 0       | 12.669  | 7.42    | 7.83    |
| 1735 | TRUE | Empty | UDP-N-acetylhexosamine pyrophosphorylase-like protein 1 OS=Homo sapiens GN=UAP1L1 PE=1 SV=2 | UAP1L_HUMAN      | ?       | TRUE | .094905451  | INF         | 0       | 0       | 0       | 0.74522 | 0.84713 | 2.94    |
| 1736 | TRUE | Empty | UMP-CMP kinase OS=Homo sapiens GN=CMPK1 PE=1 SV=3                                           | KCY_HUMAN        | ?       |      | 0.572371231 | 0.7         | 2.03    | 16.691  | 6.22    | 2.57    | 7.42    | 7.83    |
| 1737 | TRUE | Empty | Unconventional myosin-Ib OS=Homo sapiens GN=MYO1B PE=1 SV=3                                 | MYO1B_HUMAN      | ?       | TRUE | .005155173  | 3.720367683 | 6.631   | 3.1295  | 6.22    | 17.14   | 25.414  | 19.735  |
| 1738 | TRUE | Empty | Unconventional myosin-Ic OS=Homo sapiens GN=MYO1C PE=1 SV=4                                 | MYO1C_HUMAN      | ?       | TRUE | .036752639  | 2.880033302 | 2.03    | 1.0432  | 2.24    | 7.22    | 6.71    | 3.91    |
| 1739 | TRUE | Empty | Unconventional myosin-IId OS=Homo sapiens GN=MYO1D PE=1 SV=2                                | MYO1D_HUMAN      | 116 kDa | TRUE | .017663121  | 3.387905279 | 0       | 0       | 0.99746 | 0.74522 | 1.43    | 0.93978 |
| 1740 | TRUE | Empty | Unconventional myosin-Vc OS=Homo sapiens GN=MYO5C PE=1 SV=2                                 | MYO5C_HUMAN      | ?       | TRUE | .118904525  | 6.2         | 0       | 1.0432  | 0       | 3.61    | 0.84713 | 1.96    |
| 1741 | TRUE | Empty | Unconventional myosin-VI OS=Homo sapiens GN=MYO6 PE=1 SV=4                                  | MYO6_HUMAN       | ?       | TRUE | .081266401  | 4.8         | 2.03    | 0       | 0.99746 | 8.74    | 4.57    | 2.94    |
| 1742 | TRUE | Empty | UPF0160 protein MYG1, mitochondrial OS=Homo sapiens GN=C12orf10 PE=1 SV=2                   | MYG1_HUMAN       | 42 kDa  |      | 0.583741844 | 0.6         | 0       | 12.518  | 4.73    | 2.09    | 4.57    | 3.91    |
| 1743 | TRUE | Empty | UPF0568 protein C14orf166 OS=Homo sapiens GN=C14orf166 PE=1 SV=1                            | CN166_HUMAN      | 28 kDa  | TRUE | .751050258  | 0.9         | 13.262  | 18.777  | 10.972  | 14.159  | 8.13    | 16.916  |
| 1744 | TRUE | Empty | Up-regulated during skeletal muscle growth protein 5 OS=Homo sapiens GN=USMG5 PE=1 SV=1     | USMG5_HUMAN      | 6 kDa   |      | 0.140218517 | INF         | 0       | 0       | 0       | 0       | 1.43    | 2.94    |
| 1745 | TRUE | Empty | Uridine 5'-monophosphate synthase OS=Homo sapiens GN=UMPS PE=1 SV=1                         | UMPS_HUMAN       | ?       |      | 0.017662632 | 22.17883424 | 0       | 0       | 0.99746 | 8.74    | 10.166  | 3.91    |
| 1746 | TRUE | Empty | UTP--glucose-1-phosphate uridylyltransferase OS=Homo sapiens GN=UGP2 PE=1 SV=5              | UGPA_HUMAN       | ?       | TRUE | .022551025  | 11.66564417 | 0       | 1.0432  | 0       | 5.17    | 3.85    | 2.94    |
| 1747 | TRUE | Empty | UV excision repair protein RAD23 homolog A OS=Homo sapiens GN=RAD23A PE=1 SV=1              | RD23A_HUMAN      | ?       | TRUE | .823046031  | 0.8         | 0       | 7.22    | 0.99746 | 2.57    | 2.14    | 1.96    |
| 1748 | TRUE | Empty | UV excision repair protein RAD23 homolog B OS=Homo sapiens GN=RAD23B PE=1 SV=1              | RD23B_HUMAN      | ?       | TRUE | .194505642  | 0.3         | 22.103  | 91.799  | 30.921  | 14.904  | 14.401  | 13.157  |
| 1749 | TRUE | Empty | Vacuolar protein sorting-associated protein 26A OS=Homo sapiens GN=VPS26A PE=1 SV=2         | VP26A_HUMAN      | ?       | TRUE | .303769855  | 1.8         | 0       | 4.1727  | 1.49    | 3.61    | 2.14    | 4.89    |
| 1750 | TRUE | Empty | Vacuolar protein sorting-associated protein 29 OS=Homo sapiens GN=VPS29 PE=1 SV=1           | VPS29_HUMAN      | ?       |      | 0.194576287 | 3.2         | 0       | 2.0863  | 0       | 2.09    | 0.84713 | 2.94    |
| 1751 | TRUE | Empty | Vacuolar protein sorting-associated protein 35 OS=Homo sapiens GN=VPS35 PE=1 SV=2           | VPS35_HUMAN      | 92 kDa  | TRUE | .000234508  | 19.91859323 | 0.99746 | 0       | 0       | 7.22    | 6.71    | 5.87    |
| 1752 | TRUE | Empty | Vacuolar protein sorting-associated protein 45 OS=Homo sapiens GN=VPS45 PE=1 SV=1           | VPS45_HUMAN      | ?       |      | 0.022682884 | 24.374411   | 0       | 0.99746 | 0       | 4.13    | 7.42    | 12.217  |
| 1753 | TRUE | Empty | Vacuolar protein sorting-associated protein 4A OS=Homo sapiens GN=VPS4A PE=1 SV=1           | VPS4A_HUMAN      | 49 kDa  | TRUE | 0.82243974  | 0.7         | 0       | 0       | 3.98    | 0       | 0       | 2.94    |

|      |      |       |                                                                                                       |              |         |      |             |             |         |         |         |         |         |         |
|------|------|-------|-------------------------------------------------------------------------------------------------------|--------------|---------|------|-------------|-------------|---------|---------|---------|---------|---------|---------|
| 1754 | TRUE | Empty | Valine--tRNA ligase OS=Homo sapiens GN=VARS PE=1 SV=4                                                 | SYVC_HUMAN   | ?       |      | 0.009093586 | 4.729429522 | 4.06    | 0       | 4.73    | 18.63   | 12.707  | 13.157  |
| 1755 | TRUE | Empty | Vasodilator-stimulated phosphoprotein OS=Homo sapiens<br>GN=VASP PE=1 SV=3                            | VASP_HUMAN   | 40 kDa  |      | 0.971364092 | 1           | 2.03    | 8.54    | 2.24    | 9.78    | 2.14    | 0.93978 |
| 1756 | TRUE | Empty | Very long-chain specific acyl-CoA dehydrogenase, mitochondrial<br>OS=Homo sapiens GN=ACADVL PE=1 SV=1 | ACADV_HUMAN  | ?       |      | 0.007855217 | 2.001247569 | 8.13    | 10.432  | 7.97    | 20.866  | 18.637  | 15.037  |
| 1757 | TRUE | Empty | Very-long-chain (3R)-3-hydroxyacyl-CoA dehydratase 3 OS=Homo<br>sapiens GN=HACD3 PE=1 SV=2            | HACD3_HUMAN  | ?       |      | 0.140218517 | INF         | 0       | 0       | 0       | 0       | 1.43    | 2.94    |
| 1758 | TRUE | Empty | Very-long-chain enoyl-CoA reductase OS=Homo sapiens GN=TECR<br>PE=1 SV=1                              | TECR_HUMAN   | ?       |      | 0.197570015 | 2.6         | 6.631   | 0       | 0       | 6.707   | 4.57    | 6.85    |
| 1759 | TRUE | Empty | Vesicle-associated membrane protein 7 OS=Homo sapiens<br>GN=VAMP7 PE=1 SV=3                           | VAMP7_HUMAN  | ?       |      | 0.094905451 | INF         | 0       | 0       | 0       | 0.74522 | 0.84713 | 2.94    |
| 1760 | TRUE | Empty | Vesicle-associated membrane protein 8 OS=Homo sapiens<br>GN=VAMP8 PE=1 SV=1                           | VAMP8_HUMAN  | 11 kDa  |      | 0.281714709 | INF         | 0       | 0       | 0       | 5.17    | 0       | 0.93978 |
| 1761 | TRUE | Empty | Vesicle-associated membrane protein-associated protein B/C<br>OS=Homo sapiens GN=VAPB PE=1 SV=3       | VAPB_HUMAN   | ?       | TRUE | .009163088  | 5.318766828 | 6.631   | 0       | 0.99746 | 15.65   | 12.707  | 12.217  |
| 1762 | TRUE | Empty | Vesicle-fusing ATPase OS=Homo sapiens GN=NSF PE=1 SV=3                                                | NSF_HUMAN    | ?       | TRUE | .003617465  | 23.78050248 | 0       | 0.99746 | 0       | 7.22    | 5.99    | 10.338  |
| 1763 | TRUE | Empty | Vesicle-trafficking protein SEC22b OS=Homo sapiens GN=SEC22B<br>PE=1 SV=4                             | SEC22B_HUMAN | 25 kDa  |      | 0.665592284 | 1.5         | 4.06    | 0       | 0       | 2.09    | 1.43    | 1.96    |
| 1764 | TRUE | Empty | Vesicular integral-membrane protein VIP36 OS=Homo sapiens<br>GN=LMAN2 PE=1 SV=1                       | LMAN2_HUMAN  | 40 kDa  |      | 0.080775509 | INF         | 0       | 0       | 0       | 5.65    | 2.14    | 0.93978 |
| 1765 | TRUE | Empty | Vigilin OS=Homo sapiens GN=HDLBP PE=1 SV=2                                                            | VIGLN_HUMAN  | ?       |      | 0.332263297 | 1.8         | 2.03    | 0       | 5.47    | 6.707   | 3.85    | 4.89    |
| 1766 | TRUE | Empty | Vimentin OS=Homo sapiens GN=VIM PE=1 SV=4                                                             | VIME_HUMAN   | 54 kDa  | TRUE | .785762157  | 0.8         | 2.03    | 0       | 4.73    | 1.04    | 2.14    | 1.96    |
| 1767 | TRUE | Empty | Vinculin OS=Homo sapiens GN=VCL PE=1 SV=4                                                             | VINC_HUMAN   | ?       |      | 0.890700939 | 1.1         | 0       | 23.993  | 30.921  | 16.395  | 22.025  | 20.675  |
| 1768 | TRUE | Empty | Voltage-dependent anion-selective channel protein 1 OS=Homo<br>sapiens GN=VDAC1 PE=1 SV=2             | VDAC1_HUMAN  | 31 kDa  | TRUE | .589113084  | 1.4         | 4.06    | 26.079  | 5.47    | 13.414  | 15.248  | 20.675  |
| 1769 | TRUE | Empty | Voltage-dependent anion-selective channel protein 2 OS=Homo<br>sapiens GN=VDAC2 PE=1 SV=2             | VDAC2_HUMAN  | ?       | TRUE | .925278289  | 1           | 6.631   | 4.1727  | 1.49    | 5.65    | 3.85    | 3.91    |
| 1770 | TRUE | Empty | Voltage-dependent anion-selective channel protein 3 OS=Homo<br>sapiens GN=VDAC3 PE=1 SV=1             | VDAC3_HUMAN  | ?       | TRUE | .017349763  | 4.427541894 | 0       | 4.1727  | 0.99746 | 5.17    | 8.13    | 8.81    |
| 1771 | TRUE | Empty | von Willebrand factor A domain-containing protein 9 OS=Homo<br>sapiens GN=VWA9 PE=1 SV=2              | VWA9_HUMAN   | ?       |      | 0.000114504 | 5.077196078 | 0       | 0.99746 | 0       | 1.04    | 1.43    | 1.96    |
| 1772 | TRUE | Empty | V-type proton ATPase catalytic subunit A OS=Homo sapiens<br>GN=ATP6V1A PE=1 SV=2                      | VATA_HUMAN   | ?       | TRUE | .011499868  | 5.27858634  | 0       | 1.0432  | 0.99746 | 4.13    | 2.14    | 3.91    |
| 1773 | TRUE | Empty | V-type proton ATPase subunit B, brain isoform OS=Homo sapiens<br>GN=ATP6V1B2 PE=1 SV=3                | VATB2_HUMAN  | 57 kDa  | TRUE | .052200604  | INF         | 0       | 0       | 0       | 5.17    | 1.43    | 2.94    |
| 1774 | TRUE | Empty | V-type proton ATPase subunit d 1 OS=Homo sapiens<br>GN=ATP6V0D1 PE=1 SV=1                             | VA0D1_HUMAN  | 40 kDa  |      | 0.005538615 | 3.285655565 | 0.99746 | 0       | 0       | 1.04    | 0.84713 | 0.93978 |
| 1775 | TRUE | Empty | V-type proton ATPase subunit G 1 OS=Homo sapiens<br>GN=ATP6V1G1 PE=1 SV=3                             | VATG1_HUMAN  | 14 kDa  |      | 0.990696861 | 1           | 0       | 6.259   | 2.24    | 3.61    | 1.43    | 3.91    |
| 1776 | TRUE | Empty | V-type proton ATPase subunit H OS=Homo sapiens GN=ATP6V1H<br>PE=1 SV=1                                | VATH_HUMAN   | ?       | TRUE | 0.00025994  | 5.824393961 | 0.99746 | 0       | 0       | 2.57    | 1.43    | 1.96    |
| 1777 | TRUE | Empty | WASH complex subunit FAM21C OS=Homo sapiens GN=FAM21C<br>PE=1 SV=3                                    | FA21C_HUMAN  | ?       | TRUE | .534861273  | 0.5         | 0       | 1.0432  | 1.49    | 1.04    | 0       | 0       |
| 1778 | TRUE | Empty | WASH complex subunit strumpellin OS=Homo sapiens<br>GN=KIAA0196 PE=1 SV=1                             | STRUM_HUMAN  | 134 kDa |      | 0.06853503  | INF         | 0       | 0       | 0       | 0.74522 | 2.14    | 0.93978 |
| 1779 | TRUE | Empty | WD repeat-containing protein 1 OS=Homo sapiens GN=WDR1<br>PE=1 SV=4                                   | WDR1_HUMAN   | ?       |      | 0.025625731 | 2.985886677 | 0       | 4.1727  | 3.98    | 8.74    | 6.71    | 9.78    |
| 1780 | TRUE | Empty | WD repeat-containing protein 18 OS=Homo sapiens GN=WDR18<br>PE=1 SV=2                                 | WDR18_HUMAN  | 47 kDa  |      | 0.250282168 | 3.1         | 0       | 1.0432  | 1.49    | 5.17    | 2.14    | 0.93978 |
| 1781 | TRUE | Empty | WD repeat-containing protein 26 OS=Homo sapiens GN=WDR26<br>PE=1 SV=3                                 | WDR26_HUMAN  | ?       |      | 0.147672906 | INF         | 0       | 0       | 0       | 0       | 1.43    | 0.93978 |

|      |      |       |                                                                                      |                 |         |      |             |     |        |        |         |         |         |         |
|------|------|-------|--------------------------------------------------------------------------------------|-----------------|---------|------|-------------|-----|--------|--------|---------|---------|---------|---------|
| 1782 | TRUE | Empty | WD repeat-containing protein 5 OS=Homo sapiens GN=WDR5<br>PE=1 SV=1                  | WDR5_HUMAN      | 37 kDa  | TRUE | 0.52907428  | 0.4 | 0      | 5.59   | 0.99746 | 0       | 0.84713 | 1.96    |
| 1783 | TRUE | Empty | WD40 repeat-containing protein SMU1 OS=Homo sapiens<br>GN=SMU1 PE=1 SV=2             | SMU1_HUMAN      | ?       |      | 0.131893048 | INF | 0      | 0      | 0       | 0       | 4.57    | 2.94    |
| 1784 | TRUE | Empty | WW domain-binding protein 11 OS=Homo sapiens GN=WBP11<br>PE=1 SV=1                   | WBP11_HUMAN     | 70 kDa  | TRUE | .693507807  | 1.6 | 0      | 0      | 1.49    | 2.57    | 0       | 0.93978 |
| 1785 | TRUE | Empty | WW domain-binding protein 2 OS=Homo sapiens GN=WBP2 PE=1<br>SV=1                     | WBP2_HUMAN      | 28 kDa  |      | 0.2341866   | 0.2 | 0      | 4.1727 | 1.49    | 0       | 0       | 0.93978 |
| 1786 | TRUE | Empty | Xaa-Pro aminopeptidase 1 OS=Homo sapiens GN=XPNPEP1 PE=1<br>SV=3                     | XPP1_HUMAN      | ?       |      | 0.098928091 | 3.4 | 0      | 0      | 1.49    | 2.57    | 1.43    | 2.94    |
| 1787 | TRUE | Empty | Xaa-Pro dipeptidase OS=Homo sapiens GN=PEPD PE=1 SV=3                                | PEPD_HUMAN      | ?       |      | 0.875156665 | 1.1 | 0      | 2.0863 | 2.24    | 2.09    | 1.43    | 0.93978 |
| 1788 | TRUE | Empty | X-ray repair cross-complementing protein 5 OS=Homo sapiens<br>GN=XRCC5 PE=1 SV=3     | XRCC5_HUMAN     | 83 kDa  |      | 0.112146708 | 3.2 | 6.631  | 1.0432 | 2.24    | 17.885  | 5.99    | 10.338  |
| 1789 | TRUE | Empty | X-ray repair cross-complementing protein 6 OS=Homo sapiens<br>GN=XRCC6 PE=1 SV=2     | XRCC6_HUMAN     | ?       |      | 0.074706697 | 2.5 | 15.472 | 2.0863 | 3.98    | 17.885  | 22.025  | 15.037  |
| 1790 | TRUE | Empty | Y-box-binding protein 3 OS=Homo sapiens GN=YBX3 PE=1 SV=4                            | YBOX3_HUMAN     | ?       | TRUE | .803807751  | 1.1 | 13.262 | 9.86   | 18.952  | 20.866  | 12.707  | 11.277  |
| 1791 | TRUE | Empty | YLP motif-containing protein 1 OS=Homo sapiens GN=YLPM1 PE=1<br>SV=3                 | YLPM1_HUMAN     | ?       | TRUE | .373900966  | 0   | 0      | 0      | 1.49    | 0       | 0       | 0       |
| 1792 | TRUE | Empty | YTH domain-containing family protein 1 OS=Homo sapiens<br>GN=YTHDF1 PE=1 SV=1        | YTHD1_HUMAN     | ?       | TRUE | .209754271  | 3.9 | 0      | 2.0863 | 0.99746 | 7.22    | 0.84713 | 3.91    |
| 1793 | TRUE | Empty | YTH domain-containing family protein 2 OS=Homo sapiens<br>GN=YTHDF2 PE=1 SV=2        | YTHD2_HUMAN     | ?       | TRUE | .534861273  | 0.5 | 0      | 1.0432 | 1.49    | 1.04    | 0       | 0       |
| 1794 | TRUE | Empty | YTH domain-containing family protein 3 OS=Homo sapiens<br>GN=YTHDF3 PE=1 SV=1        | YTHD3_HUMAN     | 64 kDa  | TRUE | .264790325  | 7.4 | 0      | 1.0432 | 0       | 5.17    | 0.84713 | 0.93978 |
| 1795 | TRUE | Empty | ZC3H1_HUMAN-DECOY                                                                    | ZC3H1_HUMAN-DEC | ?       | TRUE | .373900966  | INF | 0      | 0      | 0       | 0       | 0       | 1.96    |
| 1796 | TRUE | Empty | Zinc finger CCCH domain-containing protein 14 OS=Homo sapiens<br>GN=ZC3H14 PE=1 SV=1 | ZC3HE_HUMAN     | ?       |      | 0.169759736 | INF | 0      | 0      | 0       | 0       | 0.84713 | 1.96    |
| 1797 | TRUE | Empty | Zinc finger CCCH domain-containing protein 15 OS=Homo sapiens<br>GN=ZC3H15 PE=1 SV=1 | ZC3HF_HUMAN     | ?       | TRUE | .110753917  | 3.1 | 0      | 0      | 2.24    | 2.09    | 3.85    | 2.94    |
| 1798 | TRUE | Empty | Zinc finger CCCH domain-containing protein 4 OS=Homo sapiens<br>GN=ZC3H4 PE=1 SV=3   | ZC3H4_HUMAN     | 140 kDa | TRUE | .588834218  | 0.4 | 0      | 0      | 3.98    | 1.04    | 0       | 0       |
| 1799 | TRUE | Empty | Zinc finger protein 106 OS=Homo sapiens GN=ZNF106 PE=1 SV=1                          | ZN106_HUMAN     | ?       | TRUE | .253272622  | 2.5 | 0      | 2.0863 | 0.99746 | 0.74522 | 4.57    | 2.94    |
| 1800 | TRUE | Empty | Zinc finger protein 185 OS=Homo sapiens GN=ZNF185 PE=1 SV=3                          | ZN185_HUMAN     | ?       |      | 0.174882284 | 0.4 | 4.06   | 11.475 | 17.954  | 6.707   | 3.85    | 3.91    |
| 1801 | TRUE | Empty | Zinc finger protein 428 OS=Homo sapiens GN=ZNF428 PE=1 SV=2                          | ZN428_HUMAN     | 20 kDa  |      | 0.555391835 | 0.6 | 0      | 2.0863 | 0.99746 | 0       | 0.84713 | 0.93978 |
| 1802 | TRUE | Empty | Zinc phosphodiesterase ELAC protein 2 OS=Homo sapiens<br>GN=ELAC2 PE=1 SV=2          | RNZ2_HUMAN      | ?       |      | 0.935347937 | 1.1 | 2.03   | 0      | 0       | 0.74522 | 1.43    | 0       |
| 1803 | TRUE | Empty | Zyxin OS=Homo sapiens GN=ZYGX PE=1 SV=1                                              | ZYGX_HUMAN      | ?       |      | 0.198161774 | 0.2 | 2.03   | 21.907 | 7.97    | 1.04    | 1.43    | 1.96    |

END OF FILE
